# Supplementary material for: Yeast cells with impaired drug resistance accumulate glycerol and glucose
Source: Royal Society of Chemistry journal article supplement (doi:10.1039/c2mb25512j), 2013-10-22
Supplement: c2mb25512j.xlsx [file c2mb25512j.xlsx]

## Sheet: Transcriptome
Expression data
ORF	C-lim-Δqdr3/Δqdr3	C-lim-Δpdr3/Δpdr3	C-lim-Δho/Δho	N-lim-Δqdr3/Δqdr3	N-lim-Δpdr3/Δpdr3	N-lim -Δho/Δho
YAL001C	9.1607	9.19861	8.94572	8.97516	8.86815	9.26272
YAL002W	8.5708	9.04183	9.29238	8.59356	7.84328	8.58814
YAL003W	12.2334	11.4706	11.8568	12.3592	12.5684	12.3826
YAL005C	12.634	12.4201	12.0653	11.8416	11.6569	12.2469
YAL007C	9.70476	8.83237	9.27845	10.4919	10.6378	10.354
YAL008W	9.34596	8.75273	9.11461	8.56041	7.42471	8.61509
YAL009W	7.56731	7.45936	7.9876	7.52325	7.15977	7.63018
YAL010C	7.93055	8.00942	8.40386	7.73477	7.71604	7.88677
YAL011W	7.71613	7.77587	7.68191	7.55178	7.73016	7.75672
YAL012W	10.853	9.94612	9.52909	11.1253	11.5082	10.8816
YAL013W	8.52932	8.863	7.76429	9.13187	9.05415	8.94054
YAL014C	8.4457	8.18213	8.13928	9.21076	8.66711	9.00749
YAL015C	6.64195	8.21284	7.09887	7.00776	6.631	6.54353
YAL016C-B	6.9499	9.39892	9.68637	5.88584	6.78892	8.18817
YAL016W	10.3881	10.2039	10.4956	10.2381	10.1361	10.5025
YAL017W	10.2738	9.87328	9.85307	9.42136	9.01316	9.79252
YAL018C	5.76356	7.56198	7.73086	5.0446	4.75426	4.49641
YAL019W	8.10842	7.95797	7.71662	8.34254	8.97254	8.28918
YAL020C	7.43753	6.95527	6.21537	7.84752	7.47633	7.30196
YAL021C	9.43591	8.41855	8.46422	9.77757	8.79439	9.08477
YAL022C	9.00963	8.86337	8.38598	9.07386	8.55696	8.78236
YAL023C	10.7967	9.70382	9.54838	11.3028	10.7579	10.9537
YAL024C	8.58408	7.76191	7.79033	8.41896	9.13498	8.49284
YAL025C	8.04092	7.58197	6.73363	8.6234	9.59215	8.06487
YAL026C	9.00537	8.5481	8.3337	9.2186	9.13718	9.13097
YAL027W	7.20141	7.76324	7.35219	7.0525	7.05361	7.09851
YAL028W	5.70288	7.52117	7.71986	5.9421	5.53367	7.22963
YAL029C	10.0077	9.39176	9.27887	9.97465	10.0228	9.95739
YAL030W	9.10112	9.14862	9.15836	9.19117	7.69604	8.82789
YAL031C	8.68568	9.11613	8.92187	8.46481	8.02023	8.60373
YAL032C	7.90582	7.21269	7.18552	7.57181	7.46608	7.70033
YAL033W	8.44931	7.79593	8.08392	8.68178	9.07273	8.2949
YAL034C	8.16922	8.23918	8.11243	8.85538	9.07072	9.10176
YAL034W-A	6.86818	6.83088	6.77568	6.82981	7.72818	7.09327
YAL035W	11.5424	11.1172	10.9692	11.47	11.514	11.2022
YAL036C	9.31536	10.9646	9.57298	9.72264	10.0718	8.95972
YAL037C-A	4.65052	7.30438	7.73921	5.40365	6.06945	5.42973
YAL037W	6.00322	7.03906	7.22819	7.02976	7.4126	6.96451
YAL038W	12.6374	12.3298	12.0604	13.3706	13.0537	13.3501
YAL039C	8.50051	7.5	8.00957	9.05974	8.42624	8.86842
YAL040C	6.96041	8.32961	8.26349	9.85001	8.71712	9.64472
YAL041W	8.80288	8.5886	9.02825	9.0768	8.73863	9.17464
YAL042W	9.94404	9.25148	9.20603	10.1333	9.5485	9.89309
YAL043C	8.44623	8.24502	8.0628	8.93685	8.42828	8.55572
YAL044C	11.1117	9.88124	10.5478	11.0663	10.5652	10.7191
YAL044W-A	9.44279	9.24945	9.38347	9.34915	8.87804	9.01059
YAL046C	8.43407	8.4493	8.1369	8.25652	7.69956	7.17529
YAL047C	6.89226	7.04386	7.01121	7.10555	7.42662	7.20456
YAL048C	7.37057	7.86199	8.46974	7.42731	7.36163	7.26707
YAL049C	10.0821	9.66999	9.95333	9.74567	8.97158	9.7314
YAL051W	9.08947	9.05347	8.89129	9.28346	8.73944	9.20712
YAL053W	9.51704	9.15595	9.48482	10.0284	10.1904	9.92202
YAL054C	12.4287	12.3602	12.7653	8.04348	7.91282	7.65582
YAL055W	8.56071	8.84166	9.06794	8.0837	7.8473	8.36592
YAL056W	9.2784	8.8828	8.70101	8.95425	8.66976	9.11777
YAL058W	7.37577	7.37605	7.55897	7.85382	7.60353	7.48019
YAL059W	7.59494	8.22709	7.49201	8.44649	9.3353	8.05248
YAL060W	10.9685	10.4502	10.4899	9.2251	9.56491	9.70351
YAL061W	11.1932	10.524	10.4244	7.2013	8.59903	8.27981
YAL062W	10.6236	9.88431	10.2637	7.88319	9.16506	9.35416
YAL063C-A	5.91034	7.68795	8.32388	5.47942	5.48915	5.81891
YAL063C	7.41734	8.61668	9.26907	8.05951	7.44888	7.81478
YAL064C-A	3.17364	5.80221	6.69155	3.09693	2.89481	3.77293
YAL064W-B	6.17879	8.52636	8.74974	5.11317	4.85868	5.08729
YAL064W	6.92265	9.54995	9.05294	6.08973	4.72099	4.95643
YAL065C	3.4819	4.96805	5.30431	3.72405	3.26116	3.55964
YAL067C	10.0422	9.47549	9.65228	7.54711	8.24394	7.67683
YAL067W-A	4.40695	7.38356	7.69681	3.94793	3.03803	3.70845
YAL068C	5.76905	8.12357	8.82666	7.21054	6.01508	6.89056
YAR002C-A	10.2761	10.2018	9.81544	10.5971	10.6052	10.3804
YAR002W	9.42552	9.72893	9.71498	9.95552	10.1139	9.83907
YAR003W	6.7653	6.61303	6.97054	7.28111	7.54995	7.26774
YAR007C	9.71951	9.49388	9.23998	8.91841	10.0595	9.37685
YAR008W	7.89385	7.92572	7.89415	7.55826	9.12246	7.7165
YAR009C	8.81277	8.12325	8.43718	8.8599	8.20812	9.85014
YAR010C	9.41346	11.6105	12.0812	10.4412	9.70497	10.3292
YAR014C	8.92209	9.26385	9.18941	9.41881	9.73631	9.40888
YAR015W	10.6177	10.1849	10.2013	11.0015	11.7687	11.3126
YAR018C	7.50003	8.35647	7.72201	7.51639	7.4131	7.58914
YAR019C	8.77748	8.94497	9.20124	8.34422	7.93165	8.52191
YAR020C	5.60691	7.63512	7.16796	6.67887	5.37589	6.70042
YAR023C	4.84584	5.88804	5.7563	5.16224	5.55954	5.6755
YAR027W	9.03476	8.94775	9.4813	9.19402	8.65117	9.91376
YAR028W	6.47792	7.29415	7.27597	8.12761	7.91735	8.07555
YAR029W	4.21252	4.9755	4.87309	5.36243	5.15247	5.62261
YAR031W	4.96011	6.39993	7.24535	4.85252	4.24695	5.21684
YAR033W	5.18335	6.52634	7.4384	6.04831	5.30136	6.38787
YAR035C-A	5.56217	9.14178	9.31929	5.02735	5.11328	4.99628
YAR035W	9.06181	8.62858	8.33992	7.08053	7.79554	6.81729
YAR042W	9.05903	8.96415	8.14887	8.68715	8.5467	8.62476
YAR050W	4.47742	4.4666	4.76181	4.7811	3.85191	5.26584
YAR064W	5.64628	8.49769	7.24633	4.45377	4.2825	4.08113
YAR066W	4.14215	7.43482	7.50936	4.15429	3.7976	3.94861
YAR068W	5.87219	7.65927	7.87819	6.09221	5.45412	6.03149
YAR071W	6.99011	8.15941	8.44225	7.72498	7.13942	7.36399
YAR073W	10.4931	8.34434	8.57994	9.60995	9.32387	9.6866
YAR075W	12.6085	12.4188	12.1531	12.549	12.5329	12.5026
YBL001C	10.7645	10.7016	11.0813	10.3804	9.74496	10.3178
YBL002W	11.6931	11.7482	11.4323	11.8938	12.0763	11.8816
YBL003C	12.7215	12.3205	12.5326	12.6021	12.7564	12.744
YBL004W	10.0483	9.52904	8.95342	10.2964	10.7132	10.1907
YBL005W-A	6.02506	7.98968	8.75029	6.68044	5.89357	6.29371
YBL005W	7.74695	3.45596	8.11243	7.69837	3.42982	7.75987
YBL006C	8.57244	7.69653	7.82691	8.85913	8.75395	8.90341
YBL007C	10.5291	9.95327	9.3374	10.1846	9.42269	9.99997
YBL008W-A	5.50622	6.6987	7.15692	3.8761	3.9742	3.43623
YBL008W	8.40373	8.06567	8.39415	8.33737	8.38118	8.08303
YBL009W	7.84274	7.94678	8.20947	7.93704	9.34733	8.0422
YBL010C	7.37633	7.85003	8.33293	7.72447	8.03517	7.91471
YBL011W	9.62527	9.455	9.18803	9.21805	8.7939	9.18913
YBL013W	4.12684	5.36312	5.12231	3.71201	3.76806	4.26342
YBL014C	8.47327	8.1181	7.63083	8.61233	8.69644	8.22996
YBL015W	11.2569	11.4783	11.0108	9.15803	9.31868	9.18211
YBL016W	4.70075	6.38594	6.62737	5.38136	5.45515	5.78885
YBL017C	10.133	9.87549	9.77456	10.5542	9.78064	10.627
YBL018C	8.5647	8.5924	8.34332	8.19377	9.29648	8.4934
YBL019W	7.56255	8.40907	8.2606	7.6266	7.35851	7.83499
YBL020W	9.13376	9.3284	9.01758	9.00149	9.3086	8.9173
YBL021C	7.5943	6.79267	6.74176	7.27282	7.34424	6.74999
YBL022C	10.0818	9.3802	9.58302	9.82614	8.67688	9.78781
YBL023C	9.26488	9.27304	9.2966	9.28275	8.75603	9.38766
YBL024W	9.45131	10.7099	9.81271	9.95128	10.207	9.63054
YBL025W	6.46759	6.07649	6.80304	7.12583	7.64171	7.22195
YBL026W	10.1785	10.4941	10.6408	10.2872	10.5248	10.4759
YBL027W	11.8542	11.6725	11.9171	11.9401	12.0442	11.912
YBL028C	7.84353	9.25148	8.57009	9.29519	9.70235	8.80939
YBL029C-A	9.08346	9.03291	9.51375	9.37649	8.99311	9.96792
YBL029W	6.14849	7.70187	7.69207	7.69582	7.03524	8.21714
YBL030C	12.4115	12.1876	12.1773	12.2234	11.9449	12.026
YBL031W	6.18151	7.30612	7.77904	6.74989	7.59909	6.84126
YBL032W	8.70337	7.78939	7.8457	8.9964	9.24345	8.54875
YBL033C	10.009	9.46845	8.9701	10.2702	10.0194	9.83865
YBL034C	9.08477	8.82094	9.25987	9.20692	9.54895	9.26986
YBL035C	8.285	8.29872	8.07325	7.69616	9.03266	8.12349
YBL036C	8.82856	8.30745	8.22039	8.87656	9.0587	8.91376
YBL037W	8.63773	8.38226	8.40399	7.97058	7.83213	7.91162
YBL038W	9.75743	8.99716	9.68032	9.20585	9.45024	9.5251
YBL039C	9.92827	9.62746	8.77588	10.7077	11.3552	10.0551
YBL039W-A	9.2164	9.15599	10.5793	8.54995	7.80412	9.3365
YBL040C	8.93804	8.50136	9.24714	9.48985	9.43097	9.60665
YBL041W	10.3529	9.72863	10.1127	10.2576	9.9836	10.3221
YBL042C	9.82811	10.88	9.62935	10.1422	10.523	8.5399
YBL043W	10.584	10.1894	9.56912	8.84555	9.03005	9.04211
YBL044W	4.39848	6.27618	6.69777	4.42403	4.38325	4.29772
YBL045C	11.6076	11.569	11.2745	11.0026	10.8179	10.3436
YBL046W	7.18312	7.65198	6.68651	7.37579	7.98832	7.43209
YBL047C	10.7591	10.6648	10.2547	10.5141	9.71093	10.5768
YBL049W	7.01202	7.47721	8.42949	7.90287	7.76785	8.1428
YBL050W	10.1622	9.16448	9.2789	9.94951	9.64179	10.2274
YBL051C	8.20485	8.87398	8.73984	8.73052	8.34192	8.33493
YBL052C	8.25691	8.51258	8.10337	8.03421	8.43727	7.91812
YBL054W	7.60874	8.2671	8.15577	8.9004	10.1024	8.19196
YBL055C	7.1848	7.86597	7.93664	8.10941	8.63709	8.02965
YBL056W	8.66562	8.73039	7.973	8.84372	8.93509	9.03499
YBL057C	8.43633	7.92866	8.57994	9.75742	9.46207	9.46079
YBL058W	9.68099	9.1729	8.9687	9.16011	9.0155	9.65333
YBL059C-A	8.79758	8.26105	9.10009	8.14966	8.1457	8.29193
YBL059W	7.94173	7.98859	8.02446	7.11744	7.2401	6.93888
YBL060W	7.04749	7.58873	7.5414	6.93662	7.02651	7.07662
YBL061C	8.0105	8.51075	7.81853	8.04655	8.29914	8.19147
YBL063W	7.33779	7.91458	8.1281	7.24614	8.31148	7.65771
YBL064C	10.956	9.98765	10.598	9.34598	8.2357	9.10211
YBL066C	8.87856	8.44786	8.39165	8.19115	8.13329	7.64264
YBL067C	9.6645	9.02394	8.59832	8.83625	8.84006	8.78025
YBL068W	9.48835	9.18216	8.96735	9.79611	9.95396	9.36214
YBL069W	7.56487	6.77804	7.2342	9.31881	9.18694	7.90971
YBL071C-B	3.79655	5.69331	5.95298	3.83836	3.64892	3.65012
YBL071W-A	8.63732	7.68538	8.5022	9.27363	9.67708	8.93616
YBL072C	12.3684	11.7759	12.4817	12.3114	12.8337	12.3834
YBL074C	4.847	6.40132	6.56893	4.63212	4.23551	4.82715
YBL075C	7.63056	8.03833	7.67373	7.3142	8.94326	8.37443
YBL076C	11.4291	10.6865	10.9106	11.3803	11.5146	11.4432
YBL078C	9.24727	10.82	10.135	9.15575	9.30353	9.97868
YBL079W	10.22	9.66711	9.82915	10.1159	10.2557	10.2419
YBL080C	5.77049	5.86252	6.39516	6.39528	6.18832	6.75536
YBL081W	7.70938	7.54716	7.5633	8.52334	8.5255	7.33927
YBL082C	8.61618	7.65504	7.58691	8.31918	8.8948	8.34872
YBL084C	8.57536	8.59483	8.56661	8.45121	8.49652	8.26131
YBL085W	9.17357	9.18509	8.841	9.31874	9.44241	9.10714
YBL086C	6.59117	7.13322	7.2469	5.98886	7.0995	7.00748
YBL087C	11.8001	11.1091	11.7366	11.8321	12.2094	11.542
YBL088C	8.84983	8.31713	7.97925	8.13029	7.90529	8.24301
YBL089W	8.3117	8.54838	8.83679	8.18817	8.13401	8.43121
YBL090W	7.94524	7.79132	8.31716	7.84005	7.92357	7.87446
YBL091C-A	7.61166	7.75822	7.97203	7.50626	7.16977	8.18108
YBL091C	10.1462	9.45109	9.10513	10.256	9.91887	10.2028
YBL092W	12.2527	12.1901	12.5475	12.4054	12.6607	12.4641
YBL093C	7.4691	7.47626	7.76029	8.97141	8.94964	8.87722
YBL095W	8.61706	9.35663	9.22629	8.93933	8.90789	9.17479
YBL097W	3.77209	6.09882	6.05137	3.31483	3.62599	3.51257
YBL098W	9.02152	8.74596	8.58149	8.44923	8.86519	8.80656
YBL099W	12.7574	13.0032	12.6462	12.4181	12.145	12.2561
YBL101C	9.48535	8.86787	9.20528	9.5736	8.42604	10.0261
YBL101W-A	8.409	10.9885	11.46	10.1917	7.54107	8.7357
YBL101W-B	10.2633	10.0177	10.4436	11.1933	9.76589	11.0533
YBL101W-C	2.76575	3.82481	4.10313	2.84431	2.74016	2.90977
YBL102W	9.35572	9.23119	9.46553	8.54655	8.70253	9.14569
YBL103C	7.75849	6.79796	7.67318	8.12099	8.15282	8.54923
YBL104C	8.8813	8.64232	8.3437	8.96112	8.79711	8.82799
YBL105C	9.41706	8.96236	8.73596	9.05313	9.00158	9.27304
YBL106C	6.81405	6.71027	6.08087	7.18685	6.64666	6.74522
YBL107C	8.39374	8.53118	8.47645	9.13736	8.67341	8.70799
YBL108C-A	8.01432	10.8181	11.1287	8.24598	7.90787	7.82884
YBL111C	7.43557	9.89535	10.1756	7.62386	7.23394	7.4825
YBL112C	8.69905	10.4898	11.307	9.11225	8.91172	9.03364
YBL113C	10.4728	10.371	10.4232	10.7404	10.4049	11.0002
YBR001C	9.75744	8.50948	8.61727	8.21156	8.29522	8.45107
YBR002C	8.57995	7.71926	7.66964	9.31837	9.26899	8.56543
YBR003W	9.01963	8.5263	8.95627	8.79319	8.19208	8.90922
YBR004C	8.12153	8.82064	8.61763	9.1703	8.7644	9.23222
YBR005W	8.30035	9.1421	7.66013	8.96513	8.13099	9.28539
YBR006W	8.55519	8.50695	8.47312	7.93727	7.26208	8.24173
YBR007C	8.51604	8.06197	7.952	9.21709	9.75032	9.58809
YBR008C	6.89018	7.60732	7.33782	7.10956	6.87037	7.13147
YBR009C	12.1619	12.5516	12.5645	12.1267	12.366	12.35
YBR010W	12.1905	12.4912	12.4518	12.2736	12.5843	12.5306
YBR011C	12.3462	11.9528	12.0244	12.4136	12.2997	12.4162
YBR013C	6.70805	5.28946	6.38567	6.34281	6.15806	6.13618
YBR014C	9.39554	8.77637	9.3894	9.39645	9.1099	9.67206
YBR015C	10.0501	9.39935	9.49585	10.1013	10.4607	9.91762
YBR016W	9.2902	10.5069	9.84635	9.97007	8.59036	9.66953
YBR017C	9.54882	9.69178	9.67374	10.2885	10.0213	10.1148
YBR018C	4.90338	7.30699	7.36922	5.14889	4.6778	4.64587
YBR019C	4.95285	5.85607	6.78647	4.18278	4.04452	4.05434
YBR020W	6.51547	8.52012	7.57408	6.44939	5.70145	6.11377
YBR021W	7.46868	7.16054	6.87016	7.17218	7.91886	6.6211
YBR022W	8.00622	7.45036	7.86727	7.86566	8.0329	7.94609
YBR023C	10.2711	9.59214	9.72501	10.1536	10.4375	10.0962
YBR024W	8.22839	10.0551	8.93565	7.92711	6.9341	8.08067
YBR025C	11.5584	11.416	11.2244	11.3149	11.5446	11.4554
YBR026C	10.509	9.92493	9.86356	9.47271	7.65526	9.45129
YBR028C	9.10611	8.76717	8.63417	8.9713	8.9903	8.77962
YBR029C	9.81064	9.31285	9.44524	8.91376	9.74211	9.04467
YBR030W	7.79215	8.48869	7.96015	7.96475	8.40052	8.00541
YBR031W	12.5512	11.9636	11.728	12.5596	12.5903	12.3812
YBR033W	8.54378	8.40016	8.56006	7.14163	6.96293	7.45721
YBR034C	9.52042	8.77217	8.97271	10.4567	11.0472	9.55443
YBR035C	9.51341	9.12875	9.44307	9.33642	9.22094	9.69462
YBR036C	10.5596	9.63283	9.26416	10.1828	10.0952	10.4067
YBR037C	8.77441	8.46255	9.05121	7.83012	7.62856	8.18047
YBR038W	9.2117	8.26157	8.314	8.46531	8.42499	8.5731
YBR039W	11.9956	11.2579	11.7514	11.7284	11.5657	11.5055
YBR040W	6.16183	7.94923	8.56467	5.81218	5.86085	5.39263
YBR041W	9.00472	9.16114	9.16782	9.24244	9.25284	9.22261
YBR042C	7.38669	8.20292	7.77258	8.18426	8.96859	8.32205
YBR043C	3.90778	8.24924	8.60071	4.01821	8.63836	9.38796
YBR044C	8.50396	8.19991	8.43806	7.9606	7.77667	8.26439
YBR045C	6.61596	7.50661	8.02091	6.78145	6.44844	6.50336
YBR046C	10.1818	9.38082	9.13314	8.33872	7.707	9.02323
YBR047W	7.81401	8.60628	8.65446	7.33589	6.30831	8.48872
YBR048W	12.2292	11.8592	12.3439	12.2183	12.4739	12.2689
YBR049C	9.10471	8.30763	8.94702	9.08141	9.25148	9.12278
YBR050C	7.1691	8.56188	8.34737	5.98337	7.42561	6.58745
YBR052C	10.4698	10.2748	10.3323	9.95715	8.98444	10.4102
YBR053C	9.81074	9.47891	10.0302	9.20481	7.79657	9.27933
YBR054W	7.25734	7.24383	8.15042	10.5622	9.48448	9.66288
YBR055C	8.69027	9.07948	8.80025	9.36995	9.34429	9.35425
YBR056W-A	7.90201	7.72618	7.22943	9.91033	9.27848	10.0886
YBR056W	9.23312	9.15465	9.27359	9.0812	7.60047	9.57683
YBR057C	7.66525	8.69768	8.12478	7.97043	8.29409	8.01494
YBR058C-A	9.62794	9.08857	9.65041	9.30779	9.85927	9.519
YBR058C	8.32614	8.7171	8.27732	8.06729	8.34759	8.18699
YBR059C	9.5291	9.21605	9.39858	9.36887	8.40271	9.40648
YBR060C	8.63429	8.34506	8.03625	8.55752	8.82745	8.2638
YBR061C	8.53145	7.50648	8.16574	8.58623	9.10067	8.09107
YBR062C	9.5657	10.1177	10.2164	8.75859	8.37729	9.24634
YBR063C	7.46506	6.8765	8.00659	8.58702	8.57511	8.4327
YBR065C	5.29407	6.94192	7.15648	6.38144	6.83997	6.42031
YBR066C	8.50416	8.86473	8.89319	10.0095	7.45316	10.0047
YBR067C	12.7182	12.7546	12.8394	11.6885	9.6428	11.3317
YBR068C	11.6368	10.7862	10.8499	9.05632	8.16001	10.3739
YBR069C	10.0213	9.26642	9.75517	8.53612	8.02577	7.24128
YBR070C	8.60448	8.43463	8.73541	7.83908	8.66981	8.07453
YBR071W	8.00807	7.35053	7.65633	7.93816	9.40921	8.53008
YBR072C-A	3.70709	5.89943	6.28176	3.3073	3.53456	3.53456
YBR072W	10.4859	10.402	10.8542	10.3332	12.1331	11.9917
YBR073W	7.60406	8.1138	7.73921	7.30395	8.28921	7.48344
YBR074W	9.19343	8.94863	8.83277	9.20295	9.24527	9.20748
YBR076W	4.8332	7.03046	7.63541	4.72742	5.07341	5.6952
YBR077C	8.8174	8.7982	8.71655	8.84364	8.70541	9.32979
YBR078W	11.8141	11.2065	11.4972	11.9479	12.312	12.1215
YBR079C	10.6457	10.338	10.2495	10.9132	10.9091	10.4988
YBR080C	9.96567	9.86309	9.61646	10.139	9.61874	10.196
YBR081C	9.41433	9.13359	8.76092	9.10923	9.04848	9.24144
YBR082C	10.8975	10.5446	11.3611	11.359	11.2686	11.6014
YBR083W	7.82442	8.46042	8.49018	8.12957	7.79007	7.84664
YBR084C-A	11.5553	11.4182	11.2358	11.5116	11.8158	11.3881
YBR084W	9.43153	9.06831	8.90048	9.96553	10.6613	9.60253
YBR085C-A	9.89632	9.83057	10.1354	9.9761	9.65165	10.055
YBR085W	6.4729	8.62753	7.98217	6.96	6.63096	6.3616
YBR086C	10.4991	9.91238	10.1536	10.4301	10.2431	10.4478
YBR087W	8.56041	8.16574	8.08436	8.41152	9.19745	8.40483
YBR088C	10.329	10.3217	10.6006	9.9268	11.4264	10.2062
YBR089C-A	9.97189	9.6387	9.88489	9.67897	9.619	9.94444
YBR090C	4.39548	4.30501	4.25071	4.16135	3.92754	4.30346
YBR091C	8.32773	8.26244	8.51109	8.50994	8.52752	7.94386
YBR092C	5.8976	6.5941	6.9046	6.73467	6.87207	6.19969
YBR093C	6.535	7.53342	7.93233	7.14715	6.93852	7.26486
YBR094W	8.42179	8.77535	8.59403	8.41224	8.35755	8.37335
YBR095C	8.58347	8.83862	8.66922	9.2019	9.26248	9.2624
YBR096W	9.66935	9.31276	9.59978	10.089	9.46992	10.144
YBR097W	8.94493	8.6317	9.1654	8.68895	7.75396	8.76882
YBR098W	7.53194	8.11309	8.40383	7.19667	7.73909	7.56796
YBR101C	10.1796	10.5462	9.99282	10.2812	11.5973	11.4177
YBR102C	8.09279	7.86808	7.77258	7.59189	8.03537	8.00961
YBR103W	9.17255	9.47516	8.73148	9.05837	9.57201	9.49456
YBR104W	8.72524	8.64265	9.03085	9.59977	9.74929	9.46722
YBR105C	9.2236	8.23947	8.84291	11.1144	10.7612	9.98849
YBR106W	10.6945	9.82563	10.453	11.2963	11.4725	11.2054
YBR107C	7.25369	7.36184	7.71293	7.59628	7.714	7.82883
YBR108W	7.30828	7.03348	6.97857	7.1059	6.19515	7.27576
YBR109C	10.912	9.8798	10.7946	11.1044	10.9621	11.2602
YBR110W	8.67491	8.55666	8.57994	9.18352	8.68969	9.58664
YBR111C	11.1054	10.8455	11.3658	10.8587	10.0322	10.9438
YBR111W-A	7.53915	7.29676	7.91362	8.15392	7.67087	8.16865
YBR112C	9.32308	8.7773	8.21957	9.12049	8.82288	8.91085
YBR114W	7.2599	7.46469	7.71501	8.58255	8.20998	8.1169
YBR115C	10.1043	9.45573	9.35272	10.1978	10.1397	10.3318
YBR117C	7.47015	7.8927	9.14857	7.44218	5.66043	5.82789
YBR118W	13.3763	13.3225	13.3323	13.3823	13.4258	13.4629
YBR119W	8.57602	8.9124	8.48724	9.12055	8.89914	9.22029
YBR120C	8.51853	9.10499	9.29031	7.72475	7.95868	7.97573
YBR121C	11.4083	11.2527	11.172	11.3425	11.7375	11.4565
YBR122C	9.17284	9.03436	9.14808	8.95996	9.07416	9.2792
YBR123C	8.76167	8.85781	8.1202	8.4986	8.67243	8.58518
YBR125C	8.46819	7.98308	8.04835	8.15691	7.76802	8.14552
YBR126C	10.8277	10.5454	11.0438	10.222	9.40933	10.7797
YBR127C	11.6844	10.2563	10.5862	11.943	11.8594	12.0091
YBR128C	5.4932	7.24575	7.06768	5.30428	4.60643	6.34593
YBR129C	7.82296	8.82401	8.11992	7.66146	7.54038	7.7992
YBR130C	8.91761	8.74286	8.92719	9.18895	9.59066	9.16959
YBR131W	8.0378	9.8069	8.35302	8.02912	7.9879	7.8161
YBR132C	7.9568	8.67845	9.36007	7.11679	6.66333	8.02178
YBR133C	8.2234	7.9104	8.1512	8.12411	8.2257	8.05102
YBR135W	8.29536	7.04893	7.76311	8.92005	8.69812	8.33768
YBR136W	8.84479	7.84635	8.10009	8.33113	8.11634	8.30215
YBR137W	10.1093	9.93573	10.4155	9.7611	9.16951	9.85683
YBR138C	7.00684	7.51832	7.85963	6.28514	6.99674	7.11199
YBR139W	9.94835	9.18221	9.40571	9.6127	8.54204	9.89492
YBR140C	10.6952	10.6976	10.5215	10.4925	9.96001	10.7335
YBR141C	7.07705	7.64592	7.62358	8.34113	9.11567	7.64487
YBR142W	9.39554	9.89817	9.20986	9.81194	10.4526	9.38077
YBR143C	10.8803	10.0059	10.455	10.9107	11.555	11.0509
YBR145W	9.34002	8.68905	8.68351	9.12232	8.68943	10.0593
YBR146W	9.56586	9.38215	9.72642	9.16837	9.254	9.31177
YBR147W	9.19194	9.48304	9.77367	8.78043	8.46858	10.1502
YBR148W	6.92368	7.86165	7.64047	6.48111	6.88267	6.79223
YBR149W	11.2228	11.3431	11.0764	10.4248	9.16379	10.5686
YBR150C	9.54253	9.72008	9.04489	8.84939	8.42845	9.09847
YBR151W	9.05879	8.36298	8.95777	8.5229	8.58512	8.98299
YBR152W	5.24282	6.96006	7.06241	5.63371	5.50252	5.46826
YBR153W	7.74728	7.64996	7.42748	7.75766	7.9406	7.68669
YBR154C	9.73306	9.53365	10.0719	9.99517	10.6944	9.55932
YBR155W	8.58468	8.74974	8.1404	9.17061	9.69063	8.59121
YBR156C	7.40514	8.03053	7.81612	7.43251	8.3839	7.52355
YBR157C	6.70042	7.00897	7.57067	5.63731	5.76642	6.2796
YBR158W	10.2536	9.69383	9.56777	10.1223	9.78329	9.77318
YBR159W	10.2505	9.35279	9.60918	9.99001	9.96041	10.0471
YBR160W	8.41929	8.5301	8.65969	8.65969	9.51868	8.98672
YBR161W	6.62691	7.97132	8.07175	7.41221	7.39436	7.55124
YBR162C	10.6453	10.5457	10.0874	10.852	11.3999	11.1784
YBR162W-A	8.95229	8.43671	9.30478	9.58347	9.66178	9.42408
YBR163W	8.30372	8.2528	8.9933	8.55945	8.67	8.73345
YBR164C	9.15093	9.05966	9.06212	9.16087	9.58195	9.36482
YBR165W	7.28115	7.57997	7.80412	7.20524	7.81553	7.78035
YBR166C	8.95335	9.33693	9.85088	9.53791	9.62342	9.50603
YBR167C	8.25526	9.41765	9.01959	8.28224	8.54038	8.58723
YBR168W	7.85343	7.7678	7.76866	7.26627	7.40405	7.51592
YBR169C	8.60883	8.39801	8.09305	8.25502	9.7157	9.5546
YBR170C	8.59275	8.78196	8.43576	8.34695	7.99189	8.60552
YBR171W	9.46949	9.11412	9.23276	9.74446	9.8614	9.55975
YBR172C	9.28713	9.24697	9.16419	9.66399	9.76082	8.90225
YBR173C	8.78222	8.97334	9.13461	9.31364	8.55352	9.1404
YBR175W	7.40377	7.59184	7.39117	7.47479	7.31034	7.31517
YBR176W	7.98672	7.78904	8.16131	7.91871	7.14767	7.86933
YBR177C	9.67595	9.25148	8.69947	10.12	9.76282	10.3144
YBR179C	8.3635	8.34163	8.1079	8.21085	8.16028	8.28424
YBR180W	4.37024	6.78353	7.37696	4.44402	4.19898	4.13445
YBR181C	12.6457	12.4636	12.4996	12.5137	12.7796	12.589
YBR182C-A	3.29264	5.62614	5.62755	2.92649	2.94688	3.41898
YBR182C	6.64624	7.36419	7.7443	7.45741	6.53184	7.31367
YBR183W	8.27162	8.98536	8.37141	7.61768	8.31268	8.56619
YBR184W	5.5639	7.46527	7.0349	5.2069	5.53512	4.63842
YBR185C	9.12576	8.73348	9.11303	8.26015	8.28274	8.27977
YBR186W	3.97073	7.21113	6.75264	3.41921	3.45965	3.72666
YBR187W	9.4081	9.24998	9.01504	9.37911	10.1191	9.15182
YBR188C	8.09673	8.79436	8.54783	8.31569	8.01888	8.00468
YBR189W	11.9399	11.9976	11.7634	11.8398	12.3859	11.8818
YBR191W	12.3388	11.9523	12.102	12.4252	12.6031	12.4116
YBR192W	7.46435	7.35905	7.45778	7.56985	7.75205	6.97234
YBR193C	7.43626	7.4164	7.77388	7.61862	7.42347	7.56091
YBR194W	7.9648	8.09086	8.7431	7.30071	7.73626	7.60466
YBR195C	8.12798	8.06223	8.0869	8.23326	8.14365	8.10719
YBR196C-A	5.69319	7.1661	6.51305	5.78901	4.96164	5.84614
YBR196C-B	4.39509	5.29407	5.49362	5.04594	4.91095	5.26236
YBR196C	12.2367	12.2526	12.0547	12.6374	11.9682	12.5274
YBR197C	6.20591	6.33983	6.63902	6.91206	6.77697	6.90667
YBR198C	9.5904	8.82537	8.82716	9.46314	9.73328	9.44855
YBR199W	10.0964	9.42746	9.86108	9.88722	9.64265	10.3411
YBR200W-A	5.08929	6.99981	7.51426	5.47849	4.6543	5.36882
YBR200W	8.31387	8.32493	8.16805	8.58753	8.1703	8.66297
YBR201W	7.89149	7.81087	8.01611	9.49958	7.96306	9.13145
YBR202W	9.65318	8.98268	9.25367	10.0486	8.7039	9.78708
YBR203W	9.04798	7.62857	8.184	8.02206	8.21742	8.34081
YBR204C	7.66631	8.51547	8.52368	7.96629	7.3068	8.50562
YBR205W	9.24105	8.93345	9.1097	9.27544	9.30578	9.21404
YBR207W	9.80252	9.84365	9.5082	10.1462	9.37037	10.9477
YBR208C	7.94116	7.89986	8.68619	10.0257	10.2377	10.2147
YBR210W	8.53458	9.38536	8.9148	8.27379	8.30438	8.60379
YBR211C	7.2963	7.36033	7.23499	7.26303	7.69928	7.63678
YBR212W	8.9039	8.70579	8.43597	8.46531	8.17861	8.47607
YBR213W	8.58308	8.09212	8.0148	8.11779	8.35049	7.96481
YBR214W	8.16039	7.7556	8.34708	7.82848	7.59416	8.6567
YBR215W	8.08216	8.45754	8.11122	7.90086	8.40362	8.04326
YBR216C	7.45401	7.54925	7.2982	7.30717	7.37213	7.35411
YBR217W	6.82913	7.81479	8.16686	7.24492	7.38333	7.19018
YBR218C	11.4384	11.3049	11.2382	11.3594	10.5397	11.3356
YBR219C	7.19286	8.94667	8.01824	6.56012	6.46406	6.21659
YBR220C	7.95042	6.93615	7.15751	8.12923	8.33381	7.91456
YBR221C	11.3963	10.9173	10.4794	11.0321	10.6723	10.9615
YBR221W-A	3.19023	5.1293	4.7146	2.81375	2.66057	3.09601
YBR222C	8.12813	6.82171	7.29387	8.49184	7.83979	8.02587
YBR223C	6.74742	6.81224	6.63902	6.60485	6.20622	6.88367
YBR225W	8.2426	8.05032	8.3145	7.8898	7.67568	8.16408
YBR227C	8.67566	8.77429	8.78022	9.10602	8.66608	9.00424
YBR228W	7.25462	8.02677	7.86116	7.88877	7.8705	8.18735
YBR229C	9.0812	9.04385	9.10211	8.90329	8.02581	8.94998
YBR230C	11.1947	10.843	11.4239	9.42479	8.38118	9.13159
YBR230W-A	10.6923	10.2135	10.6133	8.57442	8.05236	8.94598
YBR231C	6.7452	5.83367	5.64552	6.65987	6.7698	6.66544
YBR233W-A	7.84936	9.34654	8.2519	7.10836	8.20988	7.30681
YBR233W	7.5133	8.03186	7.70224	7.75776	7.55842	7.69416
YBR234C	10.3245	10.7177	10.0837	10.203	9.39914	10.2465
YBR235W	8.34946	7.63103	8.00844	8.37273	7.97207	8.45052
YBR236C	8.72419	8.29136	8.80212	8.75199	8.94319	8.84191
YBR237W	8.36383	8.57256	8.23375	8.38232	8.29192	8.36888
YBR238C	5.96103	6.75021	6.93805	8.75426	8.64064	7.74448
YBR239C	7.81933	8.03422	7.84565	8.04959	7.73591	7.72576
YBR240C	6.334	7.30063	7.74327	6.68651	5.92906	6.45084
YBR241C	8.35928	8.23682	7.53002	7.8273	6.92026	7.73535
YBR242W	7.67074	8.00483	7.66008	8.37954	8.93699	8.25465
YBR243C	9.22208	9.16684	8.69944	8.89765	9.43671	8.47688
YBR244W	7.69872	8.37498	7.94526	7.58005	8.63873	7.64739
YBR245C	9.15797	8.62872	8.79289	9.03611	9.47814	9.10688
YBR246W	8.141	7.96481	8.04134	8.51317	8.74988	8.23691
YBR247C	8.98224	8.83626	8.4875	9.28005	10.0836	8.57842
YBR248C	10.1391	9.33099	9.21492	10.5189	10.3617	10.7376
YBR249C	10.8765	9.68593	9.54443	10.8968	10.7546	10.894
YBR250W	4.98903	5.71197	6.78716	5.40186	5.20392	5.6464
YBR251W	8.10666	6.62585	7.8254	7.41738	8.18433	7.64363
YBR252W	9.34054	8.21909	9.03875	9.71567	10.3247	9.28389
YBR253W	7.23421	9.88867	8.09801	8.34352	7.95051	8.31584
YBR254C	6.11485	5.76023	6.50811	7.11765	7.23196	7.06737
YBR255C-A	10.175	10.2392	10.4166	8.90547	8.98039	9.01686
YBR255W	8.27411	8.3925	8.34531	8.08834	7.72175	8.32925
YBR256C	9.82837	9.35952	9.42903	10.3181	9.40016	10.5109
YBR257W	7.6101	8.36807	8.0882	8.36264	8.51175	8.14432
YBR258C	5.66424	6.22924	6.52355	5.76905	6.09379	6.3793
YBR259W	6.59134	6.62901	7.03945	6.96662	7.18231	7.06238
YBR260C	8.83449	8.73084	8.82338	9.17684	8.8505	9.21287
YBR261C	8.64717	8.15478	8.03087	9.45847	9.12962	8.70191
YBR262C	9.79408	9.6989	10.1487	9.35965	9.34868	9.33934
YBR263W	11.0103	10.2315	10.168	10.7452	10.6346	10.6733
YBR264C	8.07595	7.81471	8.02048	8.60327	8.69717	8.52708
YBR265W	9.5146	8.79087	8.51109	9.28848	9.52497	9.32183
YBR267W	8.51241	8.41406	7.91138	9.67631	9.90969	8.50752
YBR268W	8.87154	8.42416	8.98449	8.09782	8.1312	8.09508
YBR269C	10.8308	9.99228	10.9676	9.80854	9.37327	10.106
YBR270C	6.96222	7.96661	7.75809	7.00391	6.63898	7.11753
YBR271W	7.55716	7.39035	7.53028	8.08465	8.86345	7.51405
YBR272C	7.87381	6.53799	7.59422	7.84052	7.80942	8.0303
YBR273C	8.36238	8.99439	8.73675	8.61391	8.19625	8.83553
YBR274W	7.80627	9.99833	8.90137	8.33501	8.09874	8.24623
YBR275C	6.81803	7.5028	6.94737	7.17587	8.34278	7.7349
YBR276C	9.43242	10.2095	9.36704	9.47526	9.65913	9.37233
YBR278W	7.75174	8.06714	8.39598	8.3644	8.48314	8.46872
YBR279W	9.2337	9.18867	9.11675	9.26406	9.43547	9.38909
YBR280C	8.03116	7.25559	7.60797	6.94438	5.88309	7.11801
YBR281C	8.42197	8.10896	7.59742	7.86745	8.73245	7.96
YBR282W	9.18169	8.95773	9.83483	9.25699	8.95751	9.1895
YBR283C	10.3758	10.4711	10.1102	10.5127	10.7145	10.5655
YBR284W	5.25208	6.25253	6.83564	6.54633	4.52328	5.94702
YBR285W	8.68351	8.95542	9.72376	9.87509	6.66576	10.0089
YBR286W	11.8767	11.9255	11.8128	11.9521	11.0575	12.0156
YBR287W	8.75744	7.94979	8.50278	9.70159	9.19836	10.1925
YBR288C	8.44086	8.60002	8.77237	8.89636	9.34611	8.96688
YBR289W	8.86751	8.68309	8.84204	8.68189	8.88837	8.47953
YBR290W	8.47969	8.72916	8.44567	9.618	9.38631	9.86189
YBR291C	9.66703	9.32213	8.65951	10.0611	10.4856	9.6736
YBR293W	6.69688	7.35951	7.55969	6.79359	6.59367	6.84772
YBR294W	12.368	12.2748	11.9839	11.5924	11.9167	11.9669
YBR295W	9.16474	8.4202	8.73619	9.35174	8.41535	10.2885
YBR296C-A	4.41627	8.36413	7.43509	3.93685	3.38468	4.37523
YBR296C	7.34124	8.18125	8.20277	8.16238	8.32922	10.0499
YBR297W	8.87377	7.86876	7.50407	5.79245	6.73893	6.95074
YBR298C-A	3.96455	6.57176	6.93204	3.61163	3.86521	3.55235
YBR298C	7.78835	7.98826	8.13169	6.52362	7.86396	7.94933
YBR299W	8.38124	9.00944	9.18904	5.82344	6.57705	5.71804
YBR301W	5.05492	7.90933	8.15275	5.96858	4.89954	5.58596
YBR302C	11.072	12.0857	12.0406	11.1554	10.8908	11.3586
YCL001W-A	3.51867	6.15029	5.58537	3.64199	3.80585	3.76002
YCL001W-B	3.06734	5.32704	5.37297	2.8222	2.85892	3.11524
YCL001W	10.2098	10.8377	10.4695	10.308	10.432	10.417
YCL002C	8.12243	8.64232	8.90091	9.13243	9.43435	9.00676
YCL004W	7.52622	8.42445	8.59696	7.84537	7.36108	7.91364
YCL005W-A	10.8304	10.0736	10.9065	10.7667	10.9645	10.9217
YCL005W	8.116	8.24622	7.93565	8.27458	8.37832	8.07739
YCL008C	7.30072	7.43215	7.41902	8.14111	7.38369	7.80414
YCL009C	11.1451	11.1466	10.3704	11.4513	10.6412	11.2691
YCL010C	5.94514	6.79892	6.45992	8.03223	7.12145	7.81111
YCL011C	9.79021	9.64291	9.31793	10.1763	10.043	10.2074
YCL012C	8.39377	7.90733	8.86569	8.48985	8.48083	8.7956
YCL014W	9.13571	8.57126	8.00832	8.94005	9.23091	8.95667
YCL016C	6.99103	6.81285	7.37679	7.32944	7.33206	7.13386
YCL017C	9.52413	8.05799	8.17324	9.45282	9.00534	9.73299
YCL018W	4.9167	4.66211	4.47849	5.39074	4.87971	5.17331
YCL021W-A	5.67993	6.26671	6.84424	6.08842	5.41324	5.84481
YCL024W	8.14703	8.00385	7.65058	7.51448	8.03594	7.78151
YCL025C	12.0012	11.7572	11.596	12.0713	12.2201	11.9595
YCL026C-A	5.60363	7.24372	7.63541	5.60244	5.60494	5.91918
YCL026C-B	9.31961	8.8944	8.7001	8.2633	7.5069	8.79717
YCL027W	5.82757	7.18055	7.5229	5.53603	5.13511	5.38271
YCL028W	10.1084	10.1842	9.84312	9.57076	9.42519	9.61882
YCL029C	7.09022	7.24564	7.19895	7.77129	7.9477	7.67611
YCL030C	11.7982	11.0749	11.2105	11.9764	11.6358	12.3154
YCL031C	8.51524	8.21448	8.08899	9.40549	9.73059	8.88354
YCL032W	7.40446	7.3931	7.6964	7.29611	7.36434	7.31005
YCL033C	9.02311	8.52903	8.99897	8.53321	7.32303	8.20655
YCL034W	8.93665	8.06235	7.90162	8.94444	8.65622	9.38103
YCL035C	10.3661	10.1448	10.828	10.5535	10.0067	10.4041
YCL036W	6.90286	6.45469	6.53194	6.85715	8.13613	5.81457
YCL037C	6.13243	8.06669	7.82509	7.25633	6.52989	6.55908
YCL038C	8.14645	8.6531	8.64647	7.99131	6.97455	8.11926
YCL039W	8.2553	7.94013	8.27488	8.05976	7.15927	8.50951
YCL040W	12.5295	12.4107	11.8293	11.0521	10.0436	11.6432
YCL042W	4.76982	5.52384	5.44674	5.14763	4.94626	4.75426
YCL043C	11.3215	11.4515	10.7232	12.4491	11.0494	12.0767
YCL044C	8.0921	8.03692	8.19439	9.19038	7.63443	8.31006
YCL045C	10.5804	10.3521	10.3401	10.4322	10.4812	10.4686
YCL047C	7.74483	7.49494	7.73719	8.10153	7.3166	7.94504
YCL048W	4.69151	5.93199	5.93199	3.9628	3.91243	4.53312
YCL049C	8.54529	8.35665	8.64928	8.61103	7.28416	8.5855
YCL050C	9.95395	9.66664	10.0801	10.4015	10.6767	10.4593
YCL051W	8.27083	8.29359	8.27695	8.23307	8.23337	8.3434
YCL052C	8.60993	8.26834	8.59287	8.62266	8.50221	9.05775
YCL054W	8.57766	8.60718	8.08266	8.95236	9.83975	8.36174
YCL055W	7.56588	7.72524	8.03993	7.75766	8.06634	7.82379
YCL056C	9.41302	10.4234	10.6003	8.88738	9.51963	9.51069
YCL057C-A	11.8381	11.636	12.0922	11.3342	11.2794	11.0436
YCL057W	10.2444	9.52517	9.72276	9.64265	8.2822	9.61132
YCL058C	5.78094	7.4045	7.7972	5.96975	6.9455	6.102
YCL059C	8.43941	8.28915	7.93448	9.08292	9.90523	8.85551
YCL061C	8.14058	8.34278	8.26905	7.76795	8.81584	8.14679
YCL063W	7.95207	8.24607	8.31053	7.83849	8.6631	8.07086
YCL064C	6.06103	5.27971	6.33023	6.1772	6.93273	6.39316
YCL066W	5.4194	7.25242	8.20498	5.18529	5.81955	5.59831
YCL068C	5.906	7.69259	8.18678	5.76701	5.40747	5.42631
YCL069W	3.86956	7.07643	7.79837	3.27294	3.95353	4.73552
YCL073C	5.6123	7.69614	8.31329	5.79794	5.37753	5.89897
YCR002C	9.83878	10.6321	10.2315	9.74522	9.85332	9.98802
YCR003W	8.46288	8.72772	8.86601	8.51272	8.56696	8.71241
YCR004C	11.209	10.4768	10.8773	10.4808	9.79705	10.6991
YCR005C	12.0671	12.196	12.2874	12.2769	12.4026	12.5864
YCR007C	5.7517	6.63191	6.81048	6.23398	5.54702	6.6166
YCR008W	9.40476	8.63746	8.67649	9.73852	10.4397	9.58141
YCR009C	10.1277	9.59121	10.0662	10.5904	10.4477	10.914
YCR010C	11.0396	11.0316	12.3712	5.77031	8.23329	6.07419
YCR011C	10.3474	9.76716	10.1099	10.307	9.56178	10.3518
YCR012W	13.0511	12.3668	12.1041	13.2875	12.5218	13.2296
YCR014C	6.16892	5.76902	5.92014	6.28034	6.54415	6.5657
YCR015C	7.23065	8.37751	8.31074	7.27441	7.98901	7.26012
YCR016W	8.03115	8.26092	7.89249	8.87837	9.67861	8.58197
YCR017C	9.52429	9.1428	9.28505	9.52496	9.07328	9.56433
YCR018C	5.31642	6.79172	7.06531	5.16707	4.67564	5.40723
YCR019W	7.39231	7.67556	8.07701	7.74442	7.71678	7.78606
YCR020C-A	8.46616	7.55219	8.13635	7.82305	8.45279	8.03525
YCR020C	6.96637	8.18003	7.93565	7.04438	7.2854	6.95827
YCR020W-B	5.54683	5.53651	6.11899	6.56915	7.26255	6.90688
YCR021C	5.35229	8.32486	8.1709	7.65172	11.8984	10.8011
YCR023C	8.2544	8.1944	8.31702	7.94757	8.28386	8.44398
YCR024C-A	11.2041	10.9398	11.1874	11.5888	11.5171	11.8094
YCR024C-B	11.4019	11.6784	11.6981	11.6581	11.4261	11.8017
YCR024C	7.33561	7.87036	8.27224	7.63714	6.51698	7.3008
YCR026C	7.82646	7.39904	7.83913	7.95585	8.50408	7.98161
YCR027C	7.44859	6.73007	7.33284	7.75199	8.33813	7.62769
YCR028C-A	11.4893	10.9148	11.6762	11.0063	11.1947	11.1122
YCR028C	8.09537	8.30106	7.66689	7.86458	8.13503	7.85855
YCR030C	9.34926	8.50515	7.96375	8.82406	7.49851	8.78025
YCR031C	12.2881	11.7111	12.1	12.2789	12.3642	12.228
YCR032W	8.6865	8.7983	8.51247	8.39252	7.87306	8.16413
YCR033W	9.9245	9.45874	9.55138	9.47268	10.1067	10.1131
YCR034W	9.83457	9.34285	8.98943	9.03173	10.1808	8.57388
YCR035C	8.51135	8.2155	8.8967	9.42024	9.81097	9.06935
YCR036W	8.7324	8.03667	8.01217	8.18986	8.39767	8.54689
YCR037C	8.49	8.40016	8.09354	8.39206	8.51048	8.19291
YCR038C	7.265	7.86802	7.95129	7.21269	6.97968	7.1306
YCR042C	9.07943	9.47624	8.96495	9.0203	8.57457	9.10834
YCR043C	8.45839	9.02215	8.33227	9.06606	9.37449	8.65147
YCR044C	8.74973	9.11893	8.80711	9.37006	8.75766	9.19798
YCR045C	4.78301	7.38225	7.11025	4.2485	4.63369	4.52143
YCR046C	9.39	8.82704	9.11698	9.27749	8.51974	8.71686
YCR047C	8.27305	7.39862	7.29544	8.91239	9.31498	8.23012
YCR048W	8.36983	8.17606	7.55104	8.30589	7.55488	8.01026
YCR051W	9.01235	8.36413	8.02839	9.12221	8.89601	8.34115
YCR052W	8.20392	8.28848	7.36286	8.87046	8.92109	8.51079
YCR053W	11.3427	10.921	10.7251	11.361	11.3162	11.2923
YCR054C	7.04613	7.26361	6.76529	6.7806	7.40745	6.79428
YCR057C	8.83077	7.80657	7.91367	9.39898	9.84365	8.47172
YCR059C	7.30783	6.8182	7.12762	8.41522	8.80948	8.198
YCR060W	7.8283	7.3841	7.42334	7.86725	8.27285	7.77885
YCR061W	9.51922	8.67918	7.94798	8.3069	6.4941	7.6258
YCR063W	6.76075	7.18516	7.21687	7.47164	7.59104	6.95915
YCR065W	7.91469	7.1167	7.53078	7.86988	8.59945	8.44452
YCR066W	7.19007	7.45934	7.55969	7.16555	7.378	7.14833
YCR067C	9.1032	8.93816	8.70833	8.7627	8.08427	8.64262
YCR068W	5.98036	6.00393	6.01213	5.90721	5.71475	5.9744
YCR069W	9.1112	8.85782	8.93764	9.4189	8.57007	9.55516
YCR071C	8.5327	8.03525	8.32065	8.62778	8.36739	8.5937
YCR072C	9.37912	9.98074	9.11809	9.93562	10.4519	8.94884
YCR073C	7.69928	7.28232	7.01464	7.92481	7.62209	7.98583
YCR073W-A	9.50832	9.15038	8.91428	9.32645	8.70045	9.01761
YCR075C	7.24633	6.06977	6.51119	6.39369	7.07514	7.32876
YCR075W-A	8.66115	8.07138	8.98806	8.11886	8.1221	8.30022
YCR076C	7.71195	7.68236	7.1838	7.83183	7.53677	7.66829
YCR077C	9.83351	9.08081	8.86921	9.8297	9.843	9.90974
YCR079W	8.64225	8.58101	8.00656	8.30236	7.82095	8.35143
YCR081W	8.02702	7.58915	8.13703	8.10523	7.81113	7.89683
YCR082W	9.93907	9.57462	9.71673	9.80537	9.5353	9.76702
YCR083W	9.60687	9.0759	10.1556	8.88301	8.49608	8.9527
YCR084C	10.549	9.88751	9.36886	10.4214	10.4645	10.0722
YCR086W	8.17706	8.02992	8.27266	8.2217	8.96288	8.22176
YCR087C-A	8.30073	8.09373	7.81457	8.79724	10.1411	8.22784
YCR088W	10.1618	9.7272	9.65015	10.0032	8.78998	9.85734
YCR089W	7.38832	7.59274	7.76902	8.04217	7.49938	7.50091
YCR090C	8.92463	9.06209	9.33892	9.10762	9.15343	9.02266
YCR091W	6.94311	6.95414	7.31333	5.92624	6.02434	6.53692
YCR092C	7.70661	8.01355	8.60135	7.70643	8.22506	7.79717
YCR093W	10.3087	10.0434	10.2654	10.093	9.93609	9.99105
YCR094W	8.80073	8.25138	8.1404	8.76952	8.99274	8.70732
YCR095C	7.57616	8.39716	8.18241	8.37324	8.37269	8.56487
YCR096C	8.4688	10.3496	10.2677	9.17229	9.42575	9.67632
YCR097W	8.19562	8.76943	9.10885	7.83566	8.1683	8.34484
YCR098C	5.28869	7.21194	7.81867	5.57231	5.02895	4.99667
YCR099C	4.41669	4.90142	5.08168	5.29882	3.67269	5.39482
YCR100C	4.54822	6.13037	7.01121	5.35727	4.31303	5.52025
YCR101C	3.97512	5.65818	6.20304	3.8705	3.18371	4.02826
YCR102C	5.76715	6.56941	7.16726	6.24994	5.89136	6.3923
YCR104W	4.02148	6.75714	7.15643	4.26617	3.3787	4.1865
YCR105W	5.26504	6.82694	7.09305	5.49875	5.34374	5.05548
YCR106W	5.75999	7.40693	7.63541	5.97143	5.8396	6.16448
YCR107W	7.76723	7.90089	8.45725	7.79899	7.62749	8.16549
YCR108C	4.99689	8.50155	9.56254	5.83056	4.52763	4.78124
YDL001W	7.66738	8.324	7.92606	7.96628	8.41732	8.27341
YDL002C	7.97939	8.79945	8.05828	8.15553	8.33372	8.25812
YDL003W	8.40711	8.87424	8.70101	8.26321	9.96877	8.60917
YDL004W	12.1256	11.462	11.9147	11.6028	11.661	11.4406
YDL005C	8.18925	8.10773	7.94469	8.01029	8.02124	8.15383
YDL006W	7.95092	8.88957	8.47137	7.75563	8.48902	8.06569
YDL007W	9.52127	9.028	9.08211	9.61125	9.05113	9.64172
YDL008W	8.45417	8.48705	9.27639	8.24389	8.3772	8.31838
YDL010W	8.47657	9.94066	8.95802	8.33438	9.12644	9.127
YDL012C	9.40775	8.82858	8.86061	9.60614	9.45742	9.45619
YDL013W	8.81258	8.61482	8.44225	8.54512	8.92134	8.72593
YDL014W	11.1207	10.015	9.79433	11.5107	11.7318	10.8148
YDL015C	10.582	10.3267	10.5727	10.5623	10.6554	10.7463
YDL017W	7.31548	8.04517	7.79727	7.14436	8.37339	7.70443
YDL018C	8.27788	8.42596	8.33062	7.17491	8.31553	7.75259
YDL019C	9.81831	9.66872	9.82708	9.31518	7.69383	9.175
YDL020C	9.99923	9.69576	9.85679	9.07883	9.7488	9.9219
YDL021W	7.68882	8.25451	8.29997	7.73507	6.81615	8.02846
YDL022W	9.86882	9.19103	9.73438	9.68857	7.76191	10.2384
YDL024C	5.89262	7.55823	7.48502	6.83709	6.04082	6.85574
YDL025C	8.72052	8.1079	8.40572	8.41946	8.07461	8.95487
YDL027C	7.91731	7.26617	8.26765	7.43425	6.63808	7.93633
YDL028C	8.28384	8.09802	8.22299	8.10247	8.63291	8.23939
YDL029W	10.7974	9.96478	10.3303	10.3105	9.84752	10.4773
YDL030W	7.40671	7.1327	6.75924	7.42004	7.81056	7.27211
YDL031W	9.55283	9.71001	9.14179	9.88313	10.1998	9.41663
YDL033C	7.64109	7.7846	7.58733	7.73013	7.79007	7.42419
YDL035C	9.54978	9.17085	9.22597	9.54312	9.74438	9.78676
YDL036C	7.64107	7.41982	7.01891	7.56985	8.11026	7.33449
YDL037C	3.38879	5.89469	6.65321	4.59754	6.38194	3.54248
YDL038C	4.34507	6.31205	7.5229	7.41221	9.04733	5.81656
YDL039C	6.12683	6.67145	7.18973	8.78953	10.3467	7.26705
YDL040C	9.80235	9.75911	9.21857	9.59583	9.62284	9.61936
YDL042C	8.19562	8.23463	8.12267	8.34503	8.53664	7.95613
YDL043C	8.29977	8.65557	8.5867	8.71538	9.23744	8.28479
YDL044C	8.44221	8.53721	9.12118	8.37685	8.37141	8.21801
YDL045C	8.85375	8.80482	8.44265	8.4072	8.28817	8.65141
YDL045W-A	8.78879	9.05395	8.93246	8.95128	8.50611	8.58272
YDL046W	11.2285	10.0156	10.7047	10.8962	10.2411	10.8334
YDL047W	9.22156	8.59385	7.98889	9.53579	9.83499	9.32028
YDL048C	8.3308	7.75061	7.68641	11.5325	10.8838	10.5443
YDL049C	9.35474	9.12334	9.61132	7.64985	8.01471	7.96106
YDL051W	9.61901	9.59628	8.95736	9.76131	10.8426	9.55813
YDL052C	9.87564	9.1879	9.26774	9.45196	9.40442	9.323
YDL053C	9.46062	9.11379	9.42556	9.53929	10.0572	9.82607
YDL054C	8.52799	8.03776	8.25676	8.83067	8.84163	9.35008
YDL055C	11.7333	12.5682	11.605	11.9279	12.3612	11.8144
YDL056W	8.02833	7.98528	7.92426	7.86892	8.15059	7.8961
YDL057W	7.24787	7.09917	7.32031	7.4399	7.16198	7.51414
YDL058W	9.31933	9.33912	8.68065	9.10649	9.0321	9.31779
YDL059C	6.85438	8.02261	7.50638	6.97114	7.31606	7.27389
YDL060W	9.42638	9.2247	8.87485	9.63768	10.2773	9.0976
YDL061C	12.3745	11.9088	12.3802	12.3424	12.5848	12.3428
YDL063C	8.51782	7.77715	7.95956	9.134	10.085	8.55761
YDL064W	9.37254	8.75196	8.95089	9.11627	9.66147	8.8616
YDL065C	9.33998	11.8414	10.7396	9.12892	9.27412	9.22218
YDL066W	10.7976	9.69663	10.2413	10.5584	10.4237	11.1408
YDL067C	11.3089	9.9583	10.4576	10.8316	10.7767	10.5896
YDL069C	6.52709	7.58915	7.82063	6.74968	7.02047	6.81931
YDL070W	8.35685	10.2379	9.62092	9.80691	9.12292	9.81661
YDL072C	9.71839	9.42001	9.73043	9.51398	8.83947	9.63633
YDL073W	8.43849	8.56493	8.14111	8.3425	8.52274	8.33973
YDL074C	10.239	10.2249	10.2087	10.0258	10.4455	10.2176
YDL075W	12.2772	12.2684	12.6864	12.3178	12.5322	12.3265
YDL076C	7.84799	7.6526	8.00321	7.57273	7.50082	8.22346
YDL077C	8.27369	7.85548	8.23412	8.27869	7.93143	8.27422
YDL078C	11.1557	11.0282	11.0117	10.2964	9.75886	10.5751
YDL079C	8.77322	9.33544	8.7465	5.93153	7.05888	7.00881
YDL080C	7.7093	7.64425	7.97258	8.02722	8.02794	8.127
YDL081C	11.46	10.8442	10.9828	11.6066	12.0091	11.871
YDL082W	11.0646	9.5015	9.94227	11.189	11.8166	10.9356
YDL083C	11.6573	11.2571	11.4214	11.8442	12.2634	11.8626
YDL084W	11.8211	11.6921	11.6089	11.6082	11.7936	11.912
YDL085C-A	6.12392	5.89542	6.00722	6.28088	6.30784	7.01335
YDL085W	8.60775	9.03408	9.54367	7.11548	6.18474	6.80974
YDL086W	10.239	10.0847	9.65015	10.1156	8.47576	9.68447
YDL087C	5.65827	7.09507	7.11302	6.52641	6.5606	6.53096
YDL088C	8.5153	8.51219	8.13026	8.92096	9.18114	9.02157
YDL089W	8.02946	8.16262	8.71057	8.15262	7.91431	8.2135
YDL090C	8.33043	8.02725	8.28874	8.0329	7.76039	8.01636
YDL091C	7.99811	8.69253	8.49118	8.06611	7.49525	8.21389
YDL092W	8.79608	8.30628	8.72155	9.12541	9.52374	9.26876
YDL093W	8.20391	7.75658	7.83733	7.95775	8.22526	7.91057
YDL095W	10.3308	9.25424	9.53411	10.7518	10.4798	10.5949
YDL097C	9.85649	10.0089	9.82257	9.96836	9.41201	10.1847
YDL098C	7.00748	7.04377	7.14944	7.61481	7.95552	7.64781
YDL099W	9.47621	9.86613	9.72279	9.51197	9.48403	9.51814
YDL100C	10.5433	9.95565	9.70305	10.5288	10.3657	10.2695
YDL101C	8.92725	8.86937	9.09062	8.02444	9.63336	8.19034
YDL102W	9.0189	8.12052	8.00929	8.67478	9.36242	8.78432
YDL103C	9.52263	8.79677	8.95956	9.14418	9.35279	9.19877
YDL104C	7.18406	10.4275	8.80335	7.49048	6.74118	7.10282
YDL105W	5.67814	7.91163	7.94685	5.71172	6.14359	6.48545
YDL106C	8.23819	8.19066	7.7477	7.93102	8.48532	8.611
YDL107W	7.51543	8.09027	7.89263	6.47933	6.53559	7.07817
YDL108W	7.81653	8.2913	7.88926	8.29231	8.50061	8.27922
YDL109C	5.37928	6.45002	6.44426	6.2867	5.81506	5.57735
YDL110C	9.3402	8.4929	9.41999	8.26741	7.56415	9.34966
YDL111C	8.47493	8.40939	8.43337	9.64498	9.91355	9.09173
YDL112W	9.32241	9.20079	8.86606	9.39553	9.89406	9.05801
YDL113C	7.89209	7.4166	7.85947	7.66231	7.13652	8.50845
YDL114W	5.09413	7.44136	7.21421	4.13995	3.92311	4.70094
YDL115C	8.07298	8.29367	8.40036	8.38928	8.61816	8.76947
YDL116W	9.15237	9.34234	8.9827	9.02984	9.37818	9.10805
YDL117W	8.64943	7.93948	8.64205	8.79441	8.70878	8.44805
YDL119C	6.52189	6.96935	7.03526	6.42515	5.81288	6.48648
YDL120W	8.14805	7.08548	7.8798	7.28039	8.07833	7.33287
YDL121C	8.95028	8.92134	8.82751	8.87622	9.54552	8.70797
YDL122W	9.63928	9.0358	9.74616	9.65076	10.1727	9.47344
YDL123W	7.20882	7.12554	7.31748	9.03434	8.08868	9.06825
YDL124W	11.3339	11.2766	11.5591	12.4176	10.8448	12.4429
YDL125C	11.2839	10.9522	11.0727	12.1686	10.7029	11.7845
YDL126C	11.7602	11.824	11.4297	11.6353	10.7592	11.6781
YDL127W	6.48404	7.38225	7.70708	6.90149	8.81526	7.36922
YDL128W	10.0516	9.92379	9.60795	10.1181	9.31377	9.76291
YDL129W	5.28219	5.93883	6.03859	6.56433	7.00102	6.35404
YDL130W-A	10.8536	10.7477	11.4434	9.7296	8.78451	9.7759
YDL130W	12.3332	11.384	12.241	12.0277	12.2494	12.0241
YDL131W	11.168	11.1495	11.0026	11.2028	11.0252	11.3117
YDL132W	8.85625	8.3724	8.17762	8.44659	7.74385	8.76214
YDL133W	8.12965	8.24093	8.25779	7.5378	7.61939	8.04254
YDL134C	8.88744	8.86573	8.42262	9.37066	9.04439	9.33612
YDL135C	9.73635	9.59487	9.67626	9.19764	9.89272	9.6483
YDL137W	11.5845	11.4844	11.537	11.3473	11.0048	11.5331
YDL138W	9.53265	9.57734	9.02864	9.00793	7.98866	8.54672
YDL139C	6.70456	7.16328	7.55575	7.11586	7.0933	7.34221
YDL140C	10.1848	9.99342	9.33315	11.129	9.57752	9.53155
YDL141W	9.1602	8.27534	8.17946	8.76164	8.66757	8.56722
YDL142C	6.93269	6.6394	7.15143	7.12261	6.91526	7.46895
YDL143W	10.8701	10.2754	10.3775	10.7271	10.7783	10.629
YDL144C	9.18287	8.60459	8.91836	9.0757	8.4365	8.59101
YDL145C	10.4404	10.6456	10.5316	10.77	10.7012	10.7814
YDL146W	7.02336	7.38225	7.89106	6.96704	6.79223	7.83499
YDL147W	10.5778	9.86297	10.3314	10.7547	10.4319	10.9447
YDL148C	8.94836	8.78486	8.60499	9.26638	10.1583	9.01297
YDL149W	8.09807	7.98269	8.42752	7.46217	6.70752	7.75129
YDL150W	7.58913	7.39207	7.15143	7.86959	8.90291	7.57721
YDL153C	9.15612	8.84316	8.61056	9.29519	10.4392	9.38309
YDL154W	6.4254	7.04683	7.22991	6.12918	6.69257	6.26362
YDL155W	9.12971	8.56985	9.10219	8.95407	9.4001	8.97106
YDL156W	6.60154	7.43093	7.17057	6.86217	7.07145	6.72612
YDL157C	9.6426	9.64261	9.89455	8.72706	9.96779	8.99595
YDL159W-A	5.67391	8.3286	7.97741	4.34033	3.83916	4.28588
YDL159W	8.10236	8.22805	8.14553	8.03183	7.99559	7.91051
YDL160C-A	7.39705	7.52112	7.96442	7.19206	8.1362	7.60438
YDL160C	7.9141	8.40749	9.00429	8.5161	8.18215	9.02098
YDL161W	8.45561	8.39055	8.30912	8.33892	8.47384	8.56327
YDL164C	8.19081	8.68409	7.94404	7.70718	9.16559	8.17175
YDL165W	8.67483	8.31789	8.77456	8.75255	9.14012	9.01986
YDL166C	9.52617	9.43102	9.04532	9.82009	10.4378	9.50556
YDL167C	8.61178	7.97376	7.8095	8.6582	9.24836	7.88667
YDL168W	9.49851	9.03468	8.52079	9.16805	9.04169	9.17919
YDL169C	6.55414	6.51492	6.74728	6.43991	6.35649	7.50752
YDL170W	7.90617	7.12317	8.12227	9.6256	9.40016	9.83528
YDL171C	11.1418	10.571	10.7974	11.3462	11.026	10.5362
YDL173W	9.52294	9.14525	8.86087	9.69955	9.3858	9.74538
YDL174C	10.5429	10.6411	9.68838	9.42093	9.09605	9.76879
YDL175C	8.04176	8.99925	8.78809	8.08265	8.10238	8.32899
YDL176W	7.27884	7.8966	7.21246	7.30656	7.69995	7.5995
YDL177C	6.96772	7.25547	7.0868	7.32022	7.62373	7.29181
YDL178W	9.60007	9.11387	8.83127	9.53202	9.54367	9.29907
YDL179W	8.03292	8.69372	9.01953	8.65273	8.19578	8.37503
YDL180W	8.4898	8.43562	8.51109	7.97574	8.56342	8.40536
YDL181W	11.1742	10.1849	10.6525	10.0836	9.56219	9.94937
YDL182W	11.4072	11.8723	11.3526	11.5307	11.3419	11.6453
YDL183C	7.38929	7.48752	7.38912	7.23575	7.12378	7.2933
YDL184C	8.3485	8.12933	8.63011	7.95003	8.39193	8.13277
YDL185W	11.7058	11.5541	11.4558	12.028	11.7186	12.0814
YDL186W	3.23661	6.57237	6.76892	3.34039	3.05394	3.98189
YDL188C	9.14798	8.17875	8.66059	9.00562	8.56795	9.03705
YDL189W	8.57967	8.29647	8.47098	8.98759	9.09929	9.0149
YDL190C	9.31628	9.41592	8.93181	9.01717	8.8354	9.10824
YDL191W	12.0825	12.3674	12.4485	12.1758	12.4022	12.1064
YDL192W	11.7462	11.0496	11.7202	11.6284	11.8838	11.785
YDL193W	8.13171	7.92416	7.73961	8.47967	8.12403	8.47123
YDL194W	9.44393	9.1604	9.26366	7.90943	7.87367	8.04582
YDL195W	10.0402	10.0198	9.32575	10.4533	9.6	9.90362
YDL197C	6.88	6.83919	6.75034	7.25181	7.72161	7.50774
YDL198C	10.6045	9.62362	9.54765	10.8223	10.1246	11.0371
YDL199C	7.32862	7.89406	7.9158	6.92218	5.95387	7.21533
YDL200C	8.393	8.97274	8.91058	7.82781	7.7405	7.93957
YDL201W	8.92029	9.16555	8.64127	8.93019	9.55558	8.46572
YDL202W	8.94592	8.49543	9.07665	8.66224	8.59438	8.4419
YDL203C	7.83075	7.49112	7.50637	8.20432	8.20864	8.00676
YDL204W	7.34522	7.70041	8.77827	6.63929	6.74439	6.95389
YDL205C	4.24695	5.7151	6.11899	4.00976	3.19051	4.66198
YDL206W	7.68257	8.05799	8.34338	7.13122	6.31476	7.66852
YDL207W	8.26799	7.61476	7.6216	8.60419	8.77341	8.67916
YDL208W	10.3698	10.5498	10.4681	10.9914	11.7535	10.4859
YDL209C	7.86507	7.70038	7.97503	7.70518	8.23272	7.91861
YDL210W	7.17918	8.91924	8.23897	8.05555	7.90471	8.36518
YDL211C	7.75839	8.31185	8.51421	7.25307	8.16992	6.97562
YDL212W	10.711	9.54193	10.2044	10.7555	10.8437	10.5352
YDL213C	8.97278	9.69966	9.23656	9.52823	10.1759	9.02665
YDL214C	9.83213	10.2083	9.65012	6.21092	5.74205	6.21092
YDL215C	11.1657	10.7175	11.0939	9.09007	9.21012	9.3246
YDL216C	6.05538	5.86252	6.3091	5.67245	5.71278	6.77598
YDL217C	7.30026	6.32704	6.97692	7.58618	7.76159	7.43693
YDL218W	4.74532	6.28318	6.73067	4.07067	3.95959	4.2012
YDL219W	7.71653	7.89626	7.73728	7.91106	7.98444	7.8745
YDL220C	6.82901	7.36872	7.09824	6.55821	6.58836	6.51348
YDL222C	5.96628	6.7193	7.5229	6.49617	6.22042	5.99968
YDL223C	7.22446	6.89896	8.2463	8.13018	6.79015	7.21446
YDL224C	9.06172	8.45601	8.58779	9.43971	9.17537	9.38532
YDL225W	8.53269	9.2012	8.77205	8.54333	8.62074	8.8511
YDL226C	8.53425	7.8857	7.65748	8.41011	8.4262	8.39329
YDL227C	5.02715	6.66277	3.23514	4.86102	4.61714	3.1093
YDL229W	12.5338	12.5223	12.2291	12.6251	12.7967	12.5814
YDL230W	7.64845	8.06835	7.96379	7.9564	7.49961	8.09868
YDL231C	8.17003	9.43158	9.21777	9.25148	9.3028	9.44768
YDL232W	8.83753	8.24381	8.9542	9.2154	9.25564	9.06395
YDL233W	7.41644	7.4719	7.15143	7.32472	7.38439	7.3566
YDL234C	8.62989	7.74483	8.03427	8.31363	8.16881	8.8933
YDL235C	8.66192	7.89395	7.86727	9.36298	9.27657	9.25989
YDL236W	10.3627	9.25934	9.3317	10.5588	10.4717	10.2728
YDL237W	9.7116	8.76307	9.0363	9.40151	8.5298	9.35465
YDL238C	6.17802	7.21737	7.35837	5.9268	5.18125	6.22581
YDL239C	6.75848	7.71675	8.11243	7.02416	6.10562	7.34698
YDL240W	8.60351	7.27364	8.07906	8.24422	8.30222	8.26807
YDL241W	6.22883	7.39541	7.34764	6.66801	5.36522	5.93214
YDL243C	7.74945	8.6634	8.70382	7.97866	7.49262	8.24594
YDL244W	7.17491	8.46298	9.09743	6.29145	5.05898	5.96288
YDL245C	3.12749	5.99191	6.63729	3.31884	2.98045	3.20207
YDL246C	5.81806	7.40631	7.43326	5.66026	5.39363	5.64575
YDL247W	5.02304	6.14297	7.35889	5.15986	4.84308	5.44564
YDL248W	7.31872	7.51162	8.20179	7.27898	7.1309	7.64768
YDR001C	9.79806	9.3363	9.51865	9.47269	9.34239	9.94983
YDR002W	10.9838	10.373	10.6442	11.2796	11.7869	11.2673
YDR003W-A	8.46654	8.67442	8.32372	8.09442	8.36221	9.08188
YDR003W	7.90789	8.97566	8.19532	7.87339	8.28291	8.56237
YDR004W	8.07425	9.06513	8.61034	7.89549	8.17424	7.89961
YDR005C	8.7111	9.38534	9.39308	8.78688	8.98077	9.13155
YDR006C	8.86395	9.17154	9.40292	9.90503	9.98038	9.64478
YDR009W	7.24412	7.38225	6.98382	5.65099	4.73121	5.53183
YDR011W	10.6124	10.2986	10.0944	10.6689	9.73843	10.5158
YDR012W	11.4415	11.9757	11.9984	11.4178	11.3739	11.2487
YDR013W	8.0336	7.98182	8.04039	7.91555	8.80105	8.18835
YDR014W	6.66207	6.80296	6.94087	6.5519	7.29293	6.52538
YDR016C	8.14805	7.90315	8.75965	7.97775	8.48763	8.49803
YDR017C	9.56987	9.67153	9.42571	9.3757	9.50849	9.41446
YDR018C	8.11416	8.24632	8.32842	6.3923	6.18238	6.89405
YDR019C	9.46416	9.73038	9.38026	9.87955	10.1581	10.1913
YDR020C	6.30337	6.51305	7.13215	7.15291	7.66296	6.96849
YDR021W	7.06101	7.37539	7.36849	7.77621	8.88732	7.40862
YDR022C	7.00066	7.4003	8.29997	7.44	6.94011	7.57105
YDR023W	11.3509	10.9543	10.9183	11.0027	11.4324	10.994
YDR025W	11.8122	11.5025	12.0964	11.8536	12.1706	11.7335
YDR026C	7.80916	7.86717	7.87608	8.4909	8.51616	8.38705
YDR027C	8.77854	8.55395	8.71106	8.79274	8.26609	8.93606
YDR028C	9.26986	8.72764	8.59003	8.58339	8.76605	8.88029
YDR030C	7.44366	8.83904	8.78556	7.95187	7.84815	8.0582
YDR031W	8.05298	7.72306	8.30212	7.66491	7.44476	8.27144
YDR032C	11.8854	10.9518	11.4008	11.0028	10.2481	11.1614
YDR033W	9.98092	9.0346	9.72916	12.2051	11.8519	11.9886
YDR034C-A	6.96923	10.3535	10.7529	6.70561	7.40748	7.55004
YDR034C	9.48072	9.44167	9.5116	9.84802	9.89131	10.0045
YDR034W-B	8.00577	8.53368	9.09288	7.16673	7.36128	7.85968
YDR035W	10.368	9.4651	9.85475	10.938	10.0535	11.1219
YDR036C	8.73379	8.93871	9.18744	8.34569	7.98793	8.17071
YDR037W	11.2404	10.4936	10.7062	11.8364	11.8634	11.7165
YDR038C	10.6601	10.6393	10.5441	10.4548	10.3762	10.9148
YDR041W	9.55121	8.93169	9.48197	10.32	9.63364	10.4328
YDR042C	5.49284	7.25995	7.50636	6.33618	6.85296	6.09539
YDR043C	5.92745	7.16124	7.9278	8.28815	7.57111	9.09149
YDR044W	8.56025	7.43441	7.64176	8.70667	8.20707	7.9175
YDR045C	8.70433	7.93695	8.60115	9.29818	10.0219	9.24772
YDR046C	9.335	8.91444	8.5496	10.2698	10.0857	9.00569
YDR047W	9.46062	8.91276	9.13821	9.61349	9.37854	9.30671
YDR049W	7.40732	8.45782	8.25373	8.04029	8.2637	7.88315
YDR050C	12.9154	12.765	12.6304	13.0954	12.7286	13.1067
YDR051C	8.66047	8.92387	8.38188	8.82245	8.70027	8.84833
YDR052C	8.09158	8.16383	8.37785	8.33724	8.88494	8.32747
YDR054C	8.62035	8.64189	8.4794	9.07176	9.53544	9.25088
YDR055W	9.52826	8.98257	9.33252	10.3501	10.1246	10.4369
YDR056C	9.23657	8.7982	8.9719	9.61183	9.28546	9.41607
YDR057W	6.94393	6.95089	7.29768	7.30302	7.30302	7.5027
YDR058C	8.08883	8.13288	8.06847	8.28246	8.25246	8.55347
YDR059C	10.2116	9.33938	10.2258	9.42521	8.19924	9.16567
YDR060W	9.68763	10.6558	9.64113	9.66693	10.4605	9.23697
YDR061W	8.13379	7.8131	7.69336	8.17153	8.15244	8.38109
YDR062W	9.99043	9.84302	9.48407	10.1784	10.4508	10.2161
YDR063W	9.73429	9.7657	10.1523	10.0528	9.18685	10.0586
YDR064W	12.5001	12.1438	12.4284	12.4331	12.7594	12.4412
YDR065W	5.9575	6.6007	7.20112	6.51861	6.76511	6.31006
YDR066C	6.78822	8.15647	8.19546	7.33835	7.34277	7.13612
YDR067C	7.72727	8.08582	8.51876	8.49473	8.7292	8.77147
YDR068W	8.81241	9.31779	8.98397	8.62266	8.96288	8.66772
YDR069C	8.53203	8.22343	8.31362	8.93475	8.12501	9.14244
YDR070C	8.28377	9.02019	10.1417	8.6749	7.66636	7.85278
YDR071C	10.3563	9.81244	10.0991	10.5257	10.3816	10.6808
YDR072C	9.68599	9.49472	9.084	10.1977	9.68837	10.0567
YDR073W	8.72195	9.35375	9.42381	8.75152	8.88223	9.15368
YDR074W	10.3622	9.69345	10.3109	9.16911	8.06257	9.77271
YDR075W	8.40435	9.0984	8.36485	8.33415	8.72689	7.78321
YDR076W	6.56265	8.02845	8.25377	6.52786	6.37212	6.82139
YDR077W	12.7221	12.4967	12.5404	12.6738	12.5124	12.7973
YDR078C	7.78244	8.47229	8.76545	7.79657	7.47918	7.89729
YDR079C-A	8.32981	8.08443	7.99939	8.12991	7.81017	7.97415
YDR079W	8.48779	8.38157	8.75197	8.016	7.75028	7.94491
YDR080W	7.34751	9.07625	7.90117	7.41845	7.28231	7.14702
YDR081C	8.46785	8.51956	8.47217	8.70708	8.84591	8.54362
YDR082W	6.74984	7.42714	8.0052	7.21016	7.73706	7.66189
YDR083W	8.57674	8.60037	7.90242	8.69148	9.68143	8.3025
YDR084C	9.76985	9.43389	10.1485	9.72364	9.27147	9.86384
YDR085C	7.97188	8.31746	8.13087	7.10835	6.8733	7.44067
YDR086C	10.4724	10.1689	10.9067	10.939	11.1071	11.1093
YDR087C	8.07916	7.8392	7.66427	8.95576	9.76056	8.44808
YDR088C	7.68458	7.86798	7.84114	8.23289	8.39223	8.33796
YDR089W	9.0168	9.04339	9.16071	9.04854	9.69552	9.82329
YDR090C	8.79608	8.59125	8.96461	9.15006	9.20956	9.33261
YDR091C	10.1691	9.17585	9.38245	10.3333	11.0476	9.62122
YDR092W	9.27057	9.77753	9.97237	10.193	9.94442	10.09
YDR093W	9.34214	9.27185	8.30443	9.50408	9.53496	9.29447
YDR096W	9.50679	9.51824	9.69808	8.75377	8.24475	9.22462
YDR097C	9.22642	9.27308	8.77582	8.40432	9.63315	8.78834
YDR098C	9.88348	9.41338	9.69682	10.0833	10.4854	10.1819
YDR099W	11.7268	11.4747	11.6585	11.3443	11.0798	11.6105
YDR100W	9.47659	8.89615	9.29966	8.44125	8.04314	8.70487
YDR101C	9.4519	8.74596	8.70101	9.87788	10.4215	9.20029
YDR103W	7.3945	9.10857	8.27714	7.02102	7.01341	7.09278
YDR104C	7.86001	7.36643	6.75487	7.87282	7.58746	7.61594
YDR105C	9.05849	9.18324	8.95628	8.97019	8.93552	9.14674
YDR106W	4.62582	6.18389	7.04319	4.02634	4.59663	4.75528
YDR107C	7.71183	8.46797	8.5629	7.2521	7.00302	7.63219
YDR108W	7.58148	7.44786	7.09838	7.52311	7.69714	7.66509
YDR109C	7.0069	6.68424	7.16859	7.2653	7.37294	6.83671
YDR110W	8.1798	8.46747	8.08392	8.85364	9.12247	8.45391
YDR111C	8.87139	9.41901	8.97235	8.37251	8.28976	7.81864
YDR113C	8.5308	8.52842	8.68495	8.30542	9.53784	8.75978
YDR115W	8.66219	8.64497	9.18451	8.1404	8.27999	8.07859
YDR116C	8.70908	8.43487	8.62044	8.0604	8.11966	8.29394
YDR117C	8.96803	9.26138	9.26366	9.22664	9.41857	9.3667
YDR118W	7.21831	7.63835	7.36529	6.85173	7.37019	7.04671
YDR119W	9.97372	9.55913	9.02676	9.78761	10.1797	9.47527
YDR120C	9.53398	8.08486	8.5666	9.80668	10.3464	9.48389
YDR121W	8.30924	7.93698	7.68007	8.95296	9.14765	8.92499
YDR122W	9.54988	9.35035	9.38694	9.55046	8.04211	9.59311
YDR123C	6.70273	6.89257	7.03496	7.62584	7.73824	7.46637
YDR124W	7.1597	8.04131	7.40586	6.48754	6.31227	6.23786
YDR125C	5.24393	6.96769	7.2728	5.42245	5.24564	5.7459
YDR126W	6.70273	7.0567	7.92358	6.80236	7.14965	7.30551
YDR127W	12.0491	11.9318	11.8676	12.1345	11.5045	12.1457
YDR128W	9.00157	8.97782	8.35375	8.94704	8.95633	9.06069
YDR129C	11.4069	10.8038	10.8177	11.0988	10.5012	11.1333
YDR130C	7.26521	7.50618	7.5985	7.08984	7.86594	7.51832
YDR131C	6.84664	7.32847	7.44759	7.00681	6.78248	7.11993
YDR132C	8.37096	8.10348	8.39924	7.50657	7.7082	7.8135
YDR135C	10.3259	10.4466	10.0516	11.1745	10.1015	10.9913
YDR137W	9.49472	9.17177	9.95855	9.09528	9.36377	9.35298
YDR138W	7.26664	7.04728	7.12253	7.0413	7.41608	7.48474
YDR139C	9.15945	8.94322	9.2318	9.16641	9.3057	9.295
YDR140W	7.90828	8.6813	8.44764	8.33986	8.78968	8.27998
YDR141C	9.48717	8.49829	8.63215	9.23011	8.90685	9.26103
YDR142C	8.02704	8.35904	8.60967	8.60478	8.76636	8.71856
YDR143C	8.43809	8.48638	8.27224	8.72204	8.62728	8.4569
YDR144C	8.10696	8.43316	8.18689	8.13827	8.37223	7.5438
YDR145W	8.39696	8.41993	8.19707	8.62697	9.00065	8.74135
YDR146C	8.41489	9.16796	8.826	8.32572	8.54323	8.791
YDR147W	7.43276	7.72805	7.77759	7.45376	7.90299	7.91578
YDR148C	11.7559	11.2567	11.2407	10.4488	10.406	10.3539
YDR150W	11.1711	10.8611	11.0948	10.9314	10.7362	10.9881
YDR151C	7.158	7.29142	7.68762	8.02379	8.28049	8.38058
YDR152W	9.57018	9.65376	9.14592	9.90463	10.5089	9.86733
YDR153C	8.9442	9.10643	8.95797	9.4238	9.61471	9.68565
YDR155C	12.2657	11.3026	12.1371	12.7201	11.8636	12.5885
YDR156W	8.73257	8.06312	8.37816	9.42978	9.84346	9.18564
YDR158W	12.1187	11.5896	11.808	12.3006	11.7615	12.2884
YDR159W	8.72254	9.18549	9.05865	9.18399	8.7838	9.01999
YDR160W	6.93662	7.20814	6.90939	7.16112	6.5626	6.80422
YDR161W	9.08531	8.93015	8.15284	9.52143	10.0885	9.16387
YDR162C	7.46247	6.94478	7.72778	7.68966	8.03437	7.9743
YDR163W	7.62696	7.84264	7.8996	8.40322	8.59554	8.50734
YDR164C	8.35023	8.41855	7.82958	8.13746	7.99598	8.21764
YDR165W	8.47883	9.15959	9.44777	9.31176	10.2483	8.8414
YDR166C	8.32107	7.92494	7.71315	7.91293	8.15059	8.00797
YDR167W	9.0322	9.32868	9.524	9.37059	9.83118	9.53092
YDR168W	9.37349	10.8519	9.38694	9.7223	9.18013	9.68181
YDR169C-A	3.44782	5.53599	5.9871	3.70492	3.59808	3.90125
YDR169C	8.6929	9.66474	9.00946	8.90861	8.58919	9.14932
YDR170C	10.6972	10.2846	9.94027	10.7268	10.5294	10.7014
YDR171W	8.80125	9.02245	9.81425	8.70993	11.3572	11.7709
YDR172W	10.7702	9.94272	10.2589	10.6251	11.0168	10.6874
YDR173C	6.66108	6.95562	7.32792	5.44122	5.97409	6.25424
YDR174W	10.9153	9.94701	9.95846	10.7854	10.5002	10.4527
YDR175C	8.52465	7.90827	7.9341	8.33447	8.24999	8.53711
YDR176W	8.98726	9.71955	9.22765	9.37377	9.30289	9.44931
YDR177W	10.5863	9.90263	10.4485	10.1157	10.3072	10.3781
YDR178W	11.7693	10.7987	11.2323	10.4959	10.1316	9.89467
YDR179C	7.55662	7.61551	7.57831	7.1811	8.75023	7.56401
YDR179W-A	7.48452	8.30199	8.5717	7.77109	8.54688	7.91022
YDR180W	9.44509	9.31643	9.41796	9.01555	9.38873	9.04894
YDR181C	8.22163	8.95456	8.6274	8.0254	8.80156	8.39012
YDR182W-A	4.72112	6.7308	6.33687	5.04436	5.04771	5.00671
YDR182W	9.60424	8.88124	9.32507	9.70594	9.84209	9.71685
YDR183W	7.75101	7.93403	8.38396	8.13512	8.57244	8.26198
YDR184C	7.20871	7.66452	8.2873	8.44134	9.75182	7.45493
YDR185C	6.40732	7.40846	7.67868	6.88923	7.23531	7.45961
YDR186C	9.63701	9.90294	9.41871	10.287	10.043	10.1018
YDR188W	10.9533	10.0977	10.1125	10.8905	10.869	10.6994
YDR189W	9.17268	9.25576	9.10713	9.42639	9.4412	9.41116
YDR190C	10.409	9.70217	9.78165	10.4613	10.861	10.4212
YDR191W	7.41193	8.12233	7.96481	7.29445	6.70276	7.26389
YDR192C	6.81803	7.28076	7.6986	7.03483	7.13389	6.91714
YDR194C	9.5286	8.09245	9.16071	9.80862	9.52094	9.70996
YDR194W-A	4.73911	7.91497	6.98756	4.18984	3.69545	3.3724
YDR195W	8.78708	8.9201	9.18875	8.83489	8.90608	8.76044
YDR196C	8.67595	8.64776	8.48051	8.53694	8.48664	8.68622
YDR197W	8.09714	7.8085	8.30235	7.7576	7.91295	8.12524
YDR198C	8.00849	8.26866	8.4885	8.50515	8.48985	8.35065
YDR200C	8.58023	8.74697	8.60115	8.28902	8.59294	8.76862
YDR201W	8.77828	8.96653	9.03561	8.07888	8.48172	8.32149
YDR202C	8.55614	8.54688	9.06749	8.69628	7.91886	8.6775
YDR204W	9.60729	9.12685	9.33235	8.97537	8.19155	9.1528
YDR205W	8.54862	8.76169	8.2787	9.19494	8.66438	9.26675
YDR206W	8.06405	7.94251	7.64387	8.50649	8.75867	8.2429
YDR207C	8.41615	9.17103	8.90598	8.34207	8.50633	8.54
YDR208W	9.79039	9.46567	9.52581	9.63639	9.77997	9.7056
YDR210W	9.03812	9.67507	9.40126	9.97329	9.9175	10.125
YDR211W	9.61141	8.90519	9.26867	9.52383	10.238	9.61613
YDR212W	10.319	9.95902	9.8104	10.315	10.5491	10.2267
YDR213W	6.41522	7.60222	7.22374	7.74533	6.87972	7.41689
YDR214W	9.69408	9.68971	9.54709	9.17659	9.07263	9.24872
YDR216W	10.2328	9.20926	9.27845	7.71771	8.15053	8.48035
YDR217C	8.03395	8.4885	7.63331	8.08373	8.25353	8.07766
YDR218C	4.8429	7.12613	7.21419	4.10586	4.28564	4.14312
YDR219C	7.83906	8.00765	7.45463	7.89683	8.47963	8.2617
YDR221W	7.13453	7.44528	7.14514	6.85594	7.07145	7.01981
YDR222W	7.00195	8.20782	8.23043	9.80901	9.96629	8.27254
YDR223W	5.89054	7.07769	7.18302	4.89311	4.60295	5.25734
YDR224C	12.6152	12.6456	12.9206	12.7191	12.8499	12.8357
YDR225W	12.332	12.1188	12.1674	12.3864	12.4741	12.5546
YDR226W	11.4259	10.9945	11.2125	11.526	11.5608	11.3681
YDR227W	8.42777	9.21789	8.70101	8.5229	8.69663	8.54165
YDR228C	8.47574	8.45172	8.55485	8.10759	8.02398	8.19754
YDR229W	8.05062	8.30543	8.21348	8.04451	7.84647	8.41007
YDR231C	9.49623	8.55845	9.07781	8.56256	8.28747	8.65463
YDR232W	10.3086	9.90624	10.0943	10.7066	10.7594	10.1972
YDR233C	11.3361	10.4668	10.6839	11.473	10.8203	11.1609
YDR234W	10.4688	9.84409	9.32954	10.4628	10.9475	9.818
YDR235W	8.02375	8.42074	8.39517	8.24982	8.5285	8.76083
YDR236C	8.02051	7.52059	7.42357	7.82863	7.44598	7.58119
YDR237W	8.89867	8.6732	9.05528	8.7273	8.59532	8.68473
YDR238C	10.5493	10.1352	10.2538	10.3969	10.445	10.5418
YDR239C	8.25097	8.39146	8.20613	8.23679	8.42314	8.09434
YDR240C	6.94642	7.1013	7.1961	8.05153	8.34954	8.02876
YDR242W	7.99055	9.26742	8.91449	8.64235	9.13669	9.07002
YDR243C	7.67916	8.29492	8.44006	8.0516	8.52225	8.10066
YDR244W	8.90992	9.0879	8.35005	8.08629	8.17695	8.60739
YDR245W	9.4625	8.41941	8.42767	9.63144	10.2177	9.75087
YDR246W-A	4.52703	5.71627	6.1859	4.61429	4.18233	4.56768
YDR246W	8.47503	8.49041	8.53528	8.45669	8.42245	8.58369
YDR247W	8.22082	7.70091	8.2209	9.03602	9.21425	8.92982
YDR248C	9.31566	9.47473	9.65004	8.79147	8.39973	8.95903
YDR249C	7.42095	7.96738	8.37481	7.71383	7.97248	7.93739
YDR251W	8.84094	9.42431	8.82597	8.4647	8.43061	9.00195
YDR252W	6.71787	8.89235	7.44139	6.0487	6.3758	6.32492
YDR253C	7.32792	8.1831	8.28948	7.13203	8.61171	8.04089
YDR254W	7.0495	10.5211	9.00281	6.86218	6.70877	7.36846
YDR255C	7.04533	7.75064	8.48491	6.59836	7.1623	7.73598
YDR256C	9.51101	9.19767	9.64484	4.67959	5.35616	4.72743
YDR257C	7.59247	7.68649	7.41479	8.14418	8.54138	8.19063
YDR258C	10.4911	10.2614	10.8066	9.6754	10.5559	11.0227
YDR259C	6.71901	7.40972	7.2604	5.5971	5.4082	5.26059
YDR260C	6.35429	8.00707	7.15867	7.39293	7.28231	7.46971
YDR261C-D	7.62828	7.3667	8.20199	8.31248	7.40915	8.89811
YDR261C	7.47437	7.25258	7.55091	7.6829	8.1706	7.59966
YDR261W-B	9.92204	10.2584	10.9065	10.9798	10.0762	10.9643
YDR262W	9.23712	9.12627	9.19437	9.41223	9.99814	10.1266
YDR263C	7.34661	7.50402	7.86625	8.07697	7.42907	8.60331
YDR264C	9.17083	8.28848	7.73837	9.5899	9.49015	10.487
YDR265W	8.10863	8.52786	7.83532	8.62631	8.39826	9.03617
YDR266C	8.5946	8.80091	8.61837	9.18881	9.18787	8.92804
YDR267C	7.99577	7.91718	7.59173	8.18731	8.47099	8.18227
YDR268W	7.55044	8.16728	8.17899	7.87114	7.66978	8.06285
YDR270W	9.78218	9.81885	8.90137	10.4146	9.14517	10.7852
YDR272W	9.22684	8.02043	9.15083	8.99288	8.98061	9.12971
YDR273W	6.55597	6.37004	6.09269	6.8282	6.94215	6.98718
YDR275W	8.71025	8.90521	8.65591	8.21269	8.6675	8.52367
YDR276C	11.5535	10.7628	11.6249	11.6386	11.2632	11.7285
YDR277C	9.59793	9.14848	9.26095	8.68004	9.84547	9.91969
YDR279W	7.55213	7.31947	7.16878	7.54249	8.34065	7.698
YDR280W	9.28892	9.00982	9.22038	9.68605	9.99756	9.5663
YDR281C	6.04546	7.01407	6.89432	6.03843	7.24333	6.12714
YDR282C	7.6257	8.03575	8.29603	7.49146	7.26884	7.54529
YDR283C	9.24501	8.59296	8.95523	9.07591	8.95651	9.12844
YDR284C	8.72494	8.46004	9.07769	10.373	9.09269	10.5392
YDR285W	5.97856	7.66058	7.69649	7.05141	5.26049	7.19089
YDR286C	7.86625	8.32302	8.58773	7.54678	7.0261	7.41488
YDR287W	9.08366	8.10677	8.30182	8.0626	8.19394	8.3559
YDR288W	7.28802	6.82018	7.27499	7.52449	7.75579	7.69348
YDR289C	7.81602	8.00985	7.835	7.71061	8.11352	7.91421
YDR291W	8.34576	8.82707	8.69023	8.1654	8.15839	8.31247
YDR292C	9.34897	8.46814	8.32256	9.05321	9.50515	9.06953
YDR293C	10.1784	9.50727	10.039	10.3776	9.47832	10.5185
YDR294C	10.0828	8.61224	8.6784	9.24078	9.11284	9.26585
YDR295C	8.61913	9.04618	8.96239	9.02338	9.2542	9.07405
YDR296W	8.64297	7.93673	8.68548	8.36298	8.40448	8.45023
YDR297W	8.75478	7.98868	8.18723	9.44487	10.4591	9.15132
YDR298C	11.8906	11.5881	11.3895	11.586	11.5504	11.3574
YDR299W	9.44087	8.86202	8.75749	9.74025	10.4363	8.99518
YDR300C	9.75081	9.53284	9.1754	9.46461	10.167	9.28689
YDR301W	8.63412	8.20782	7.8651	8.39995	8.21991	8.59048
YDR302W	8.70425	8.17929	8.72315	8.5388	9.22161	8.48122
YDR303C	9.08854	9.47803	9.1392	8.98271	9.1582	9.24043
YDR304C	10.8225	10.3051	10.9605	10.9187	10.4139	10.8586
YDR305C	8.74252	8.47217	8.97937	8.57824	8.41667	8.90525
YDR306C	8.45927	7.94231	8.09523	7.73038	7.73746	8.20385
YDR307W	8.60238	9.09143	9.32033	8.43681	8.5411	8.6972
YDR308C	8.44143	8.51301	8.90868	8.59275	8.71497	8.44699
YDR309C	7.6794	9.95565	8.73825	9.22441	10.2805	9.81074
YDR310C	9.48673	11.4913	9.7717	9.74308	9.70219	9.43464
YDR311W	8.57722	9.08181	8.97362	8.78187	9.19803	8.88726
YDR312W	7.65546	7.17349	6.97744	7.84366	8.2374	7.45697
YDR313C	8.29585	8.75743	8.44167	8.02759	8.69265	8.83
YDR314C	6.04142	8.26834	8.32305	6.17082	6.47193	6.56142
YDR315C	6.31692	6.70639	7.50607	6.85729	5.44674	7.07528
YDR316W-B	11.2373	11.8857	12.1305	11.9589	11.2923	12.0038
YDR316W	8.68459	8.81097	8.86742	8.33066	8.0719	8.25395
YDR317W	6.24408	7.4844	7.07855	5.32608	6.64886	6.04989
YDR318W	8.04019	8.80478	8.7223	7.59997	8.19326	8.14119
YDR319C	8.56156	9.02286	9.22038	8.57863	8.60337	9.27129
YDR320C-A	9.51601	9.69757	10.0872	9.46159	9.57444	9.4603
YDR320C	8.63459	8.88304	8.39446	8.90362	8.57705	8.756
YDR321W	9.86601	9.04211	9.31879	9.91113	10.4041	9.55692
YDR322C-A	10.6479	11.0485	10.9931	10.4018	10.2449	10.1322
YDR322W	8.78812	8.14465	8.60012	8.50912	8.61511	8.37735
YDR323C	6.46702	7.08353	7.24404	6.89398	7.09274	7.11521
YDR324C	9.14193	8.97702	8.90386	9.42395	9.99969	8.85717
YDR325W	8.07994	8.47647	7.55403	7.50586	8.32124	7.84309
YDR326C	9.41712	9.48751	9.44639	9.8246	9.67735	9.85481
YDR328C	9.83186	8.83137	9.47338	9.47182	9.52848	9.74623
YDR329C	8.23791	8.46958	8.21992	8.00753	7.8309	8.36922
YDR330W	7.54848	7.60968	7.7339	7.41603	6.55988	7.80964
YDR331W	7.80499	7.85181	8.88141	8.55382	8.89884	8.66209
YDR332W	7.61643	8.69251	8.44225	7.78551	7.81875	7.86315
YDR333C	8.68974	8.50263	8.33387	8.69119	8.90519	8.72583
YDR334W	9.55137	9.25348	9.17218	9.36381	9.23499	9.38747
YDR335W	10.0996	9.61395	9.49437	9.57412	9.61624	9.84152
YDR336W	6.63519	7.49052	7.35747	7.18607	6.74118	7.15906
YDR337W	8.658	8.55014	8.77175	8.52188	8.41606	8.62207
YDR338C	7.79477	8.07948	7.48674	7.78194	7.76634	7.91924
YDR339C	9.50752	9.35535	9.6453	9.99425	10.879	10.0391
YDR341C	11.6908	11.1676	11.48	11.4383	11.6781	11.5511
YDR342C	12.4641	12.8613	12.7385	10.8867	11.7251	12.0171
YDR345C	7.53452	9.26549	8.90137	12.5902	12.592	11.8305
YDR346C	9.68726	8.99532	8.28257	9.53333	9.9764	9.50018
YDR347W	9.44664	9.37595	8.85848	8.96254	8.88163	8.9447
YDR348C	8.02673	7.89917	7.41783	8.19522	8.81249	8.49127
YDR349C	9.22701	9.2045	9.07245	9.20544	9.18285	9.13601
YDR350C	7.73611	7.68649	8.13146	8.05104	8.0961	8.26247
YDR351W	9.43684	9.1004	8.90137	9.28511	9.53256	9.39862
YDR352W	7.43846	7.34724	7.68368	8.58119	8.65159	8.27752
YDR353W	11.1033	10.8858	10.5717	10.9639	11.1366	11.0202
YDR354W	9.82137	9.74445	9.3383	9.5762	8.85973	9.76358
YDR356W	8.17704	7.8001	7.84342	7.648	8.46851	7.90287
YDR357C	7.9484	8.56786	8.95076	7.25182	7.44293	7.75048
YDR358W	7.92297	7.73893	8.60115	7.54159	6.94996	8.72186
YDR359C	8.46802	8.66034	8.42322	8.12419	7.62692	7.97699
YDR361C	8.47165	8.20673	8.67824	9.2691	10.2173	9.11113
YDR362C	8.48369	8.15509	8.38599	8.47456	8.62405	8.59432
YDR363W-A	10.0228	10.5229	10.393	9.94986	9.71936	10.2604
YDR363W	6.89389	7.19475	7.4108	7.23177	7.47491	7.34901
YDR364C	8.38729	8.513	8.25206	8.49652	8.95633	8.29883
YDR365C	7.57192	7.84734	7.86798	7.93073	8.96697	7.928
YDR366C	6.29847	8.00183	8.07273	5.90531	6.06375	5.70183
YDR367W	8.76321	8.60624	9.18212	8.87075	8.94039	8.98755
YDR368W	9.89101	9.20039	9.45011	9.71836	8.25345	9.73113
YDR369C	7.25091	8.24709	8.0592	7.06042	6.8025	7.0242
YDR370C	7.76044	7.8371	8.02832	7.96815	8.59446	8.09852
YDR371W	6.65699	6.20235	6.28949	6.17774	6.50612	6.11974
YDR372C	8.53914	8.74234	8.34149	8.96373	8.93855	9.45318
YDR373W	9.18544	8.74091	9.07543	9.05256	9.23061	9.313
YDR374C	4.6139	7.29034	7.47231	3.41647	3.66921	3.71288
YDR375C	8.65552	8.36562	8.64205	8.04283	7.81698	8.19874
YDR376W	7.9523	7.66472	7.10713	7.83411	7.33091	7.91184
YDR377W	10.741	10.0088	10.6499	10.7183	10.5615	10.5643
YDR378C	8.79376	8.34255	8.44566	8.33501	8.88277	8.46896
YDR379C-A	9.05211	9.62654	9.74986	8.43023	7.39769	8.51832
YDR379W	9.23857	9.24973	9.22772	8.93416	8.74136	9.03395
YDR380W	7.53022	7.89274	7.95676	5.30892	6.05466	5.53132
YDR381C-A	8.02306	8.59848	8.29586	7.86461	7.5182	8.13405
YDR381W	10.625	10.1757	9.93456	10.694	11.0394	10.9357
YDR382W	12.6837	11.8275	12.5455	12.526	12.9135	12.6216
YDR383C	6.30343	6.64649	6.16214	7.4427	7.64303	7.4573
YDR384C	11.4356	10.8816	11.2095	9.25201	8.71367	8.65527
YDR385W	12.5026	12.3206	11.8348	12.6395	12.5892	12.6414
YDR386W	7.25949	8.14285	7.86727	7.33928	7.59633	7.45217
YDR387C	8.23214	8.4036	8.41925	8.36341	7.78759	8.3751
YDR388W	10.2089	8.90197	8.62205	10.2516	9.16879	9.83813
YDR389W	9.07502	7.81231	8.43157	8.88841	8.82639	9.15413
YDR390C	8.79645	9.50911	8.60539	8.4351	8.94189	8.49107
YDR391C	7.60253	7.39231	7.98357	7.61495	7.17989	7.97571
YDR392W	8.41399	8.58371	8.59467	8.57852	8.55513	8.81041
YDR393W	7.07808	7.12856	7.46952	7.05998	7.35436	7.17185
YDR394W	10.0332	9.03566	9.46098	9.94231	9.67006	10.1007
YDR395W	9.74087	9.79792	9.41297	9.84322	10.5552	9.63215
YDR397C	9.28392	9.8392	9.24976	9.74609	9.76468	9.27532
YDR398W	9.34196	9.66922	8.71996	10.1723	10.5572	8.97711
YDR399W	10.8983	11.0917	11.0882	10.9358	11.6458	10.6129
YDR400W	8.35955	8.02595	7.80971	9.24238	8.90799	8.4042
YDR402C	3.48578	5.66031	5.94036	3.14239	2.77299	3.03352
YDR403W	5.30452	6.21589	7.12435	4.33299	5.16262	5.37092
YDR404C	9.30437	8.70188	9.13878	9.22718	9.45378	9.32858
YDR405W	8.50802	9.28089	8.30867	7.66148	8.03752	8.118
YDR406W	7.85334	8.2562	7.74226	8.48563	7.86647	8.51151
YDR407C	8.91667	8.41246	8.71492	8.87985	9.08126	9.17464
YDR408C	9.19755	8.19769	8.35411	9.57936	10.2595	9.62407
YDR409W	8.22807	7.9183	7.96171	8.10786	7.78259	7.55042
YDR410C	7.60905	7.52498	7.82943	7.67664	8.0393	7.61426
YDR411C	8.52056	8.6391	8.03686	9.05767	8.23189	8.70849
YDR412W	8.20797	7.52945	7.11129	8.94093	9.28095	8.36893
YDR414C	6.96385	7.98868	8.02678	7.33835	7.92792	7.38778
YDR415C	7.85346	7.97832	7.74607	7.5847	7.52865	7.58043
YDR416W	6.94556	7.10097	6.46214	6.87185	7.19218	6.89926
YDR418W	12.1529	11.6028	12.226	12.0273	12.4612	12.1009
YDR419W	6.99697	7.49114	7.67505	7.59078	7.57462	7.62451
YDR420W	9.87432	9.78269	9.55229	10.5718	9.99281	10.199
YDR421W	7.23781	7.25216	7.43093	7.69254	7.2181	7.54484
YDR422C	8.7636	8.01622	8.13164	8.78951	8.49449	8.82396
YDR423C	8.83938	8.87542	8.846	8.83211	8.51987	9.31222
YDR424C	10.1174	10.2291	10.832	9.5444	9.44048	9.80644
YDR425W	7.70554	7.89977	8.19557	7.34724	7.16145	8.18887
YDR427W	10.2522	9.53665	10.0153	10.1029	10.0972	10.409
YDR428C	8.23018	8.14977	8.00767	7.68732	8.02298	7.87608
YDR429C	10.2405	9.61365	9.98719	10.5414	11.006	10.3174
YDR430C	8.42923	8.33303	8.13427	7.95736	6.92563	7.61467
YDR432W	10.9504	11.2781	10.1975	11.062	10.6621	10.8406
YDR434W	8.97883	8.41663	8.86047	8.85254	9.28694	9.12065
YDR435C	8.88955	8.91694	8.54816	8.21074	7.15845	8.58164
YDR436W	8.47172	7.66058	7.90186	7.51042	6.94802	7.83702
YDR437W	5.60681	6.84735	7.57655	5.85062	5.59031	5.61142
YDR438W	7.23292	8.34503	8.04795	6.88694	7.06615	7.10035
YDR439W	7.42138	7.78504	7.82835	7.80463	7.997	7.72424
YDR440W	8.20627	8.71185	8.00287	7.62408	8.48312	7.92561
YDR441C	9.69457	8.9066	8.93565	9.57633	10.2289	9.62034
YDR443C	8.11522	7.41577	8.12917	8.24433	7.7594	8.02433
YDR444W	8.58959	8.37894	8.38203	8.80922	8.89455	8.51865
YDR446W	3.98108	6.1045	6.0557	3.8753	4.37539	4.07413
YDR447C	11.4534	10.9171	11.5936	11.3508	11.9002	11.4092
YDR448W	7.84789	8.52129	8.24713	7.7963	6.96216	7.60489
YDR449C	8.3572	8.89867	8.50897	8.80312	9.75804	8.2187
YDR450W	12.3521	12.3335	12.3004	12.3109	12.4679	12.1537
YDR451C	8.21897	7.9916	8.1974	7.05781	7.99445	7.1633
YDR452W	9.67254	10.6283	10.0015	9.57045	8.99341	9.80359
YDR453C	7.42242	7.43643	7.8198	6.83792	6.60013	6.23193
YDR454C	11.3918	10.8422	11.1627	11.5159	11.5513	11.2846
YDR456W	9.63831	9.50256	9.07794	9.6675	8.88722	10.0865
YDR457W	10.8881	10.636	10.2416	10.6184	10.3882	10.7095
YDR458C	8.99078	9.19952	9.03777	8.96652	8.70928	8.96446
YDR459C	7.98204	8.09668	8.33544	8.26032	8.37648	8.3001
YDR460W	7.78719	8.49635	7.82548	8.04156	8.21904	8.18334
YDR461W	6.99144	8.20735	7.65255	7.47572	6.70989	7.32854
YDR462W	8.695	8.50746	8.76503	8.04531	8.38779	8.366
YDR463W	8.17613	8.15103	8.48459	8.91256	9.15625	9.02339
YDR464W	8.58854	8.50172	8.05287	9.21483	9.28236	9.06591
YDR465C	7.66296	8.01568	7.78919	8.32668	9.07694	7.91745
YDR466W	9.30616	9.24965	9.51832	9.07015	8.83729	9.16776
YDR468C	8.55528	8.74283	8.864	8.8223	9.30854	9.11711
YDR469W	8.06272	7.75466	8.59155	8.31012	8.89709	8.51156
YDR470C	8.42455	8.22112	8.71166	7.79931	7.44665	8.43055
YDR471W	11.7058	10.9347	11.4086	11.9065	12.0076	11.6257
YDR472W	8.09811	8.22014	8.36009	8.78262	8.70083	8.46437
YDR473C	8.66726	8.4885	8.62357	8.67735	9.12541	9.00038
YDR475C	9.00341	9.09143	8.77588	9.37556	8.76807	9.36896
YDR476C	7.82372	7.74352	7.25851	9.07768	8.02816	9.73684
YDR477W	9.42613	8.70883	9.29967	9.06144	9.1965	9.49905
YDR478W	7.73299	8.74068	8.20356	7.97639	8.81517	7.96575
YDR479C	8.23988	8.91527	8.28876	7.5269	7.62713	8.41954
YDR480W	6.73874	7.2993	7.24259	6.9439	7.84025	7.13158
YDR481C	8.3952	8.00071	7.85448	9.37074	9.15794	9.49377
YDR482C	6.16638	6.45392	6.08192	6.99514	7.74394	7.51159
YDR483W	10.6141	9.98341	10.0823	10.8757	10.8654	10.9816
YDR484W	7.27887	8.05403	8.24596	7.47794	7.58252	7.74456
YDR485C	8.82528	8.76357	8.93208	8.88404	8.96038	8.8908
YDR486C	8.67654	9.04546	8.70075	8.7743	8.01122	8.78136
YDR487C	10.2664	9.56871	10.2468	10.4851	10.4292	10.6528
YDR488C	6.1802	6.80549	6.0758	6.19581	6.88144	5.66609
YDR489W	6.69065	7.42155	7.86449	7.03583	8.13812	7.17942
YDR490C	8.85642	8.86573	9.2176	8.72957	7.23899	8.79064
YDR492W	9.97617	9.48676	9.74241	10.7103	9.84437	10.5065
YDR493W	7.74624	7.48381	8.16565	7.9329	7.84311	8.00379
YDR494W	8.44609	8.35531	8.75089	8.4228	8.62014	8.66623
YDR495C	7.95025	7.36648	7.87528	7.78303	8.07445	8.10799
YDR496C	9.88946	10.1527	9.7886	10.5982	11.009	9.98758
YDR497C	12.3663	11.9276	11.9398	11.55	11.8857	11.8412
YDR498C	8.23967	8.19355	8.18593	8.3547	8.38477	8.23967
YDR499W	8.07546	8.35266	7.73332	7.67239	7.69745	7.76411
YDR500C	11.8318	12.0064	11.9884	11.9839	12.3645	12.0619
YDR501W	6.56694	7.21752	7.60637	5.35683	7.55419	6.09373
YDR502C	11.9749	10.9684	11.3236	11.6857	12.2583	11.6338
YDR503C	7.4948	7.98017	7.57058	6.79908	7.182	7.05114
YDR504C	9.56408	9.78831	9.79171	9.56408	9.32212	9.78162
YDR505C	9.32699	8.28137	9.20918	9.51002	9.21902	9.7161
YDR506C	6.00742	6.65074	6.93661	6.373	5.64968	6.14872
YDR507C	9.29286	9.31545	8.73896	9.00562	10.0471	9.49084
YDR508C	10.4876	10.6748	9.38206	9.42732	9.81125	8.1951
YDR510W	11.0609	10.2553	10.7553	10.9193	11.0846	10.8374
YDR511W	8.73343	8.35392	8.9678	8.10765	6.9833	8.03891
YDR512C	5.67529	5.75838	6.19368	4.57864	3.86899	4.75882
YDR513W	10.9598	10.4338	11.6199	10.1129	9.62301	10.433
YDR514C	7.81414	7.64424	7.26347	8.06319	8.51175	7.52914
YDR515W	6.87543	6.03403	6.77854	6.37993	6.43204	6.44927
YDR516C	10.0862	9.48549	9.96351	8.63478	9.08082	9.72247
YDR517W	10.114	10.2388	9.65015	9.97824	9.35202	9.95463
YDR518W	7.97527	7.97948	7.84777	9.71464	8.7461	9.3608
YDR519W	9.50457	8.67127	9.09445	10.2008	9.41845	9.97987
YDR520C	8.29837	8.22801	8.46789	8.36786	8.45398	8.27775
YDR522C	4.05161	6.06715	6.25688	3.45154	3.41911	3.55236
YDR523C	5.88801	7.54479	7.33219	5.39449	5.30297	5.17093
YDR524C-B	12.7496	12.2003	12.5971	12.9698	12.9544	13.0012
YDR524C	7.67104	7.6391	8.07089	8.16134	8.66346	8.23521
YDR524W-A	6.80136	11.4776	11.88	7.30939	7.49624	8.28899
YDR525W-A	10.8542	9.87401	10.4197	10.3851	10.1573	10.6595
YDR527W	8.55139	8.68035	8.55753	9.60742	10.0012	9.32526
YDR528W	7.43742	6.88688	7.65764	7.46812	6.98037	6.94749
YDR529C	12.1517	12.1417	12.339	12.1593	11.9944	11.6366
YDR530C	8.60483	8.69561	8.15907	8.26178	8.17378	8.56681
YDR531W	10.2628	10.1444	9.95176	9.48108	9.59681	9.79272
YDR532C	7.43784	7.77148	7.73284	7.44515	8.14541	7.97128
YDR533C	8.42909	8.06594	8.25534	9.07849	8.82601	9.54466
YDR534C	6.33907	7.31986	7.19693	8.15321	6.38948	10.2765
YDR536W	7.87536	7.95696	8.07939	4.61189	5.33842	4.91221
YDR538W	6.72724	7.19089	7.21213	7.60946	7.92872	7.59494
YDR539W	7.79007	7.52993	7.50367	8.11947	8.00899	8.52477
YDR540C	5.58451	7.03573	7.04113	7.69486	5.83304	7.35607
YDR541C	7.16648	8.02385	7.5475	7.92049	8.05434	8.22772
YEL001C	9.18906	8.81583	9.05969	9.29175	9.10481	9.25974
YEL002C	10.2631	9.86455	9.86232	10.2734	10.0686	10.3169
YEL003W	8.58189	8.70912	8.79445	8.41659	9.25069	8.59262
YEL004W	7.39203	8.91647	8.39308	6.86681	7.10294	7.16191
YEL005C	7.84911	8.12455	8.78416	7.58042	7.33091	8.07062
YEL006W	8.28244	8.58292	8.86118	8.82725	8.80716	9.06711
YEL007W	9.81077	9.25341	9.12668	10.0452	8.8949	9.36569
YEL009C	12.7501	12.6987	12.6113	12.7898	12.6847	12.8732
YEL011W	10.7361	10.8055	11.2098	8.86386	9.04478	10.5193
YEL012W	9.18469	9.14508	9.51417	8.69946	8.66355	9.60585
YEL013W	9.61405	8.24375	9.37112	9.66512	9.21509	9.90532
YEL015W	8.32313	8.16077	7.72824	8.13605	8.63176	8.42959
YEL016C	7.94118	7.94118	7.51809	7.80762	8.13786	7.94169
YEL017C-A	9.35854	8.67971	9.9338	11.3199	11.3637	11.2597
YEL017W	9.31441	9.07948	9.23402	9.37675	8.91291	9.15454
YEL018W	8.37033	8.30178	8.11243	8.514	8.81485	8.41531
YEL019C	4.81145	6.91053	7.38556	5.18856	5.18808	5.0105
YEL020C	7.94541	7.83612	7.34321	8.16977	7.57611	7.68525
YEL020W-A	9.17409	8.84366	9.55951	8.58026	7.65662	8.47744
YEL021W	3.2254	2.85678	2.62224	2.9554	2.94326	2.79307
YEL022W	9.76138	9.2333	9.3994	9.65685	9.9143	10.047
YEL023C	7.3269	8.34156	8.46774	7.57311	7.21524	7.67764
YEL024W	11.1055	9.2141	9.7772	10.2703	10.5475	9.49178
YEL025C	7.17528	7.31602	7.23018	7.58805	7.4114	7.60987
YEL026W	11.1763	10.788	11.2839	11.8594	12.0725	11.1006
YEL027W	11.7018	10.5884	11.4864	11.9004	11.9399	11.9466
YEL029C	7.8254	8.55664	8.56007	8.3697	8.50718	8.46892
YEL030W	5.5905	6.86294	6.70831	6.51901	6.13778	6.154
YEL031W	10.8826	10.0357	10.108	11.2537	10.8599	11.1787
YEL032W	9.52664	8.93418	8.9387	9.51175	8.79849	9.26656
YEL034W	11.7993	11.4522	11.8075	11.4881	11.5161	11.2979
YEL035C	4.79596	6.39898	6.34723	4.30609	4.54967	4.18485
YEL036C	8.52586	7.71429	7.7062	8.2085	8.51488	7.85739
YEL037C	9.46654	8.55034	8.0215	9.5658	9.13958	9.1821
YEL038W	8.69638	7.93922	8.05232	9.14347	8.29427	8.70466
YEL039C	6.59061	6.53251	7.34354	6.1227	9.7616	7.95148
YEL040W	9.44435	9.09651	9.21584	9.96567	9.21749	9.08587
YEL041W	8.25256	8.83266	8.5773	7.51042	6.90286	7.56528
YEL042W	10.398	9.71878	9.99201	9.89256	10.7422	9.97025
YEL043W	8.95463	8.43671	8.57085	8.90739	8.77777	8.63011
YEL044W	8.93675	7.46488	7.8544	8.76743	8.65089	8.91823
YEL046C	9.53961	8.73309	8.38568	10.9471	10.3788	10.2433
YEL047C	9.32095	8.92798	8.74159	8.85953	9.47957	9.10396
YEL048C	5.35674	6.26891	6.70944	5.61339	6.91247	6.00251
YEL049W	5.6479	7.21444	7.82784	6.5224	6.15968	6.73135
YEL050C	8.88741	8.57731	8.69543	8.53045	8.14445	8.55183
YEL051W	10.6387	9.96522	10.3573	10.7053	10.7418	10.9891
YEL052W	9.96986	9.5151	9.55376	9.49939	9.34811	9.42672
YEL053C	8.24268	8.29004	8.36296	8.50593	8.49758	8.22574
YEL054C	11.3451	10.5639	10.9606	11.2063	11.7541	11.1653
YEL055C	8.81488	8.88678	8.36754	8.82098	9.59352	8.65928
YEL056W	8.75782	9.06503	8.70585	8.70463	8.77955	8.85866
YEL057C	6.66651	7.41595	7.33675	4.37702	4.47173	5.08771
YEL058W	9.84881	9.38482	8.98584	9.76767	9.72099	9.88609
YEL059C-A	7.74258	7.75898	8.41278	7.72234	7.55806	7.69496
YEL060C	10.8885	9.24759	9.66074	10.601	9.62205	11.0144
YEL061C	8.84273	8.89014	8.65134	8.44794	9.35508	8.79022
YEL062W	7.52399	7.80259	7.96481	8.30077	8.05949	8.5087
YEL063C	10.3245	9.26248	10.0737	11.1132	11.384	11.243
YEL064C	7.16159	7.99776	8.2422	6.70313	7.32692	7.2021
YEL065W	11.652	11.2313	11.2053	11.5677	10.7101	12.0288
YEL066W	8.48487	8.11467	8.43729	8.66311	8.27351	8.32334
YEL069C	3.82591	6.42371	6.57361	3.26221	3.2317	3.43575
YEL070W	6.78739	7.56226	7.90302	7.12745	6.24689	6.54298
YEL071W	9.699	9.39857	9.63937	10.4116	11.0466	11.1431
YEL072W	7.24454	6.66067	7.67247	7.92269	8.60856	8.17971
YEL073C	6.07835	6.97554	7.09125	5.55894	6.17136	7.09137
YEL075C	3.22032	5.51962	6.19641	3.09103	2.95206	3.20077
YEL076C-A	7.03425	10.4533	11.1146	7.04438	6.83628	6.74269
YEL076C	7.29818	9.9331	10.3755	6.12244	5.71464	5.97494
YER001W	7.27282	6.50494	7.24306	9.44933	9.63384	9.36556
YER002W	8.76809	9.2378	9.09905	9.27126	10.122	8.9357
YER003C	11.1815	10.6422	10.7984	11.3385	11.4323	10.7885
YER004W	10.1184	9.26019	9.13857	9.57138	9.41714	9.6122
YER005W	7.7641	7.38568	8.07257	8.21214	8.03236	8.03283
YER006W	10.0265	9.96067	9.49393	10.0451	10.9476	9.87535
YER007C-A	10.3253	9.68864	10.3481	10.5055	10.8631	10.6816
YER007W	7.79269	9.29729	8.6569	7.78104	7.83006	7.7493
YER008C	9.43988	9.50529	9.43442	9.5398	9.40653	9.62184
YER009W	11.0064	10.9893	11.1635	11.2787	11.0692	10.7675
YER010C	8.51854	8.30682	8.66059	8.73897	8.34259	8.65171
YER011W	6.61211	6.66945	7.21261	6.96107	6.64868	6.6582
YER012W	10.6568	10.4249	11.0343	10.5804	9.70133	10.6311
YER013W	9.34076	9.02295	8.82297	9.40518	9.23267	9.35483
YER014C-A	3.65976	6.03935	6.49171	3.8046	3.82173	5.21558
YER014W	7.95876	8.00735	7.59733	8.17446	7.91574	8.06093
YER015W	10.1353	9.72309	9.44113	6.22426	6.18654	6.8159
YER016W	7.41088	7.58106	7.11217	7.45395	8.58308	7.95944
YER017C	9.00748	8.93346	7.98213	8.87828	8.29672	8.784
YER018C	7.66529	7.21589	6.59189	7.33525	8.30178	7.76624
YER019C-A	10.0703	10.3935	10.7292	10.4437	10.5294	10.5857
YER019W	7.53076	7.632	7.56854	8.03702	7.88347	7.90135
YER020W	8.98109	10.3718	9.27628	9.54955	9.03552	10.2816
YER021W	10.0074	9.95028	9.81271	9.97388	9.61502	10.121
YER023W	10.7546	9.87881	9.5455	10.3386	10.4709	10.4767
YER024W	9.95807	10.3745	10.9251	7.88884	8.10247	8.21684
YER025W	11.1953	10.0605	10.2609	10.8521	11.4242	10.8723
YER026C	10.1401	9.34687	9.60879	9.61708	9.68583	10.0588
YER027C	7.8285	7.59678	7.9425	8.17698	7.89627	8.19039
YER028C	5.60515	7.95083	7.46373	8.33524	7.33504	7.1872
YER029C	8.08451	8.57211	7.97275	8.46562	8.7206	8.50583
YER030W	10.7441	10.9988	11.068	9.6929	9.55618	9.91576
YER031C	9.78654	9.11624	9.20483	9.7284	9.72972	9.63036
YER032W	7.8276	9.16498	8.93565	8.01686	8.42383	7.93566
YER033C	8.04666	7.74921	8.34775	8.49745	7.47518	8.49236
YER034W	7.62132	7.21901	7.37637	7.94099	7.63391	7.78181
YER035W	8.42478	8.08785	8.32455	9.56756	9.63877	10.3703
YER036C	10.7066	9.92008	9.76898	11.0652	11.4936	10.8508
YER037W	4.65438	6.80885	7.02637	8.09053	8.17186	7.73579
YER038C	5.30911	6.47869	6.78103	5.66223	5.97963	5.50152
YER039C-A	4.02474	5.52059	5.75494	4.05073	4.31741	5.172
YER039C	5.92315	7.32002	7.31964	6.24793	5.29932	6.82229
YER040W	8.57522	7.92178	8.61259	8.9172	8.57733	9.13164
YER041W	7.34763	7.97683	7.63406	7.32081	7.03141	7.10191
YER042W	9.99319	10.1307	10.2389	9.32888	10.0059	9.58631
YER043C	12.2347	11.6299	11.8907	12.5566	12.4586	12.3579
YER044C-A	3.73292	6.13983	6.83557	4.01819	4.03221	4.34265
YER044C	9.02848	8.7201	9.04816	9.49415	8.83704	9.89204
YER045C	7.61527	8.24417	7.8369	9.28371	8.69578	9.29373
YER046W	7.76242	8.74732	8.02295	7.94388	7.68417	8.83014
YER047C	8.28123	8.43498	7.79157	8.1146	8.16304	8.16992
YER048C	10.4948	9.9201	10.06	9.99133	9.79333	10.2085
YER048W-A	7.96068	8.17922	8.27777	8.68297	8.61562	8.95528
YER049W	9.32664	9.11819	8.84455	10.4155	10.3549	9.82413
YER050C	9.83741	9.83913	10.1925	9.6046	9.68454	9.72354
YER051W	8.19749	8.9648	8.29977	7.91703	7.67275	8.11473
YER052C	11.1734	10.5074	11.0637	11.5791	11.1023	11.519
YER053C-A	6.89155	8.19153	7.90436	7.63141	8.70186	8.1172
YER053C	8.746	9.32805	9.50307	9.06463	9.4629	10.3059
YER054C	7.49331	7.57993	8.4885	5.43874	5.94785	6.24625
YER055C	11.0807	10.4173	10.5331	11.7348	11.3669	11.6476
YER056C-A	11.7056	10.9755	11.6275	11.6842	11.982	11.4
YER056C	11.0361	10.7118	11.3991	12.06	11.9752	11.6414
YER057C	10.9752	10.9039	11.2611	10.8069	10.409	10.7497
YER058W	6.95216	7.07967	7.64033	5.42255	4.45375	6.08099
YER059W	8.29844	8.28609	8.21028	8.44717	8.29385	8.63662
YER060W-A	4.80948	6.87635	6.51824	4.6893	5.05238	5.23149
YER060W	5.11508	6.13121	6.38508	5.72895	6.45558	5.96555
YER061C	6.86829	7.3118	7.01265	7.73665	7.69232	7.60412
YER062C	8.75103	7.60001	8.15983	9.97044	9.195	8.90488
YER063W	9.63968	8.98336	9.34848	9.64889	9.51084	9.72765
YER064C	9.50695	8.83707	8.93385	8.21888	9.27232	7.85058
YER065C	9.07861	8.7307	9.57224	7.06904	7.47053	7.16599
YER066W	7.27938	7.81923	7.85177	7.07407	7.33118	7.29761
YER067W	10.9141	10.5947	11.9184	9.21536	10.5268	11.1021
YER068W	9.16573	9.20491	8.9978	9.38281	9.29677	9.48477
YER069W	11.6913	11.3675	11.2557	11.7534	10.9918	12.1325
YER070W	10.9208	10.0957	10.0476	10.821	11.7112	10.9953
YER071C	7.06211	7.06019	7.20726	6.7971	6.66094	7.29985
YER072W	10.5391	9.94445	10.2777	10.6411	10.4089	10.6261
YER073W	9.71453	10.813	9.84593	10.5364	9.07304	11.0905
YER074W-A	8.88693	9.00386	9.17308	8.7755	8.80912	8.75639
YER074W	12.1202	11.3486	11.8044	11.9504	12.1068	11.9717
YER075C	8.85417	8.94836	8.74034	9.48115	9.06914	9.60123
YER076C	6.52442	6.2775	6.63751	6.31782	6.21484	6.39799
YER077C	7.47574	7.97058	7.42408	8.21052	8.33119	8.04527
YER078C	7.41486	7.08425	7.75191	7.76531	7.74801	8.06588
YER078W-A	4.13821	6.44328	7.26937	4.29389	4.21324	4.46158
YER079W	8.97916	9.63635	9.94882	8.49814	8.90322	9.68116
YER080W	10.0247	10.0414	10.0572	9.83954	9.43423	9.99865
YER081W	9.60402	9.12866	9.27893	9.93287	11.2903	11.0635
YER082C	8.36355	8.16574	7.28148	9.09252	9.80332	8.32959
YER083C	9.4121	9.07161	9.41019	9.60816	9.52094	9.38902
YER085C	5.23791	7.28076	6.04813	4.1754	4.50345	3.8569
YER086W	10.7936	10.038	10.1933	10.906	11.0199	10.837
YER087C-B	10.0694	10.007	10.144	10.7266	10.5407	10.2851
YER087W	8.10559	8.04298	7.82861	7.69947	7.23581	7.59093
YER088C	9.54408	10.6324	9.2113	10.5775	10.257	10.3793
YER089C	9.14966	7.77468	7.49414	9.02278	8.84984	8.91057
YER090W	9.97473	9.50996	9.06288	10.0243	9.82535	10.3408
YER091C	12.6682	11.7644	11.9747	12.6736	12.8722	12.6697
YER092W	8.81378	8.69064	8.60313	8.53721	8.73245	8.75161
YER093C-A	8.46439	8.58371	8.57994	7.57806	7.03366	7.52637
YER093C	8.64325	8.61589	8.51493	8.6342	8.64325	8.76107
YER094C	10.5982	8.82955	9.77857	9.89355	9.93079	10.4093
YER095W	9.9543	9.03013	9.12537	8.93171	10.1716	9.40519
YER096W	5.34761	6.08089	6.42274	5.14224	4.99239	4.74835
YER098W	7.23513	7.48381	7.39018	6.37128	7.15312	7.24633
YER099C	8.60406	8.62793	8.98132	8.2211	9.33643	8.46624
YER100W	9.13648	8.06213	8.42253	9.29685	9.269	9.3233
YER101C	8.3927	7.58641	8.46624	7.65514	7.6517	8.25018
YER102W	12.0482	10.8237	11.6209	12.1005	12.756	12.0183
YER103W	7.83338	8.7784	7.87205	8.81728	11.2846	11.7683
YER104W	6.83709	7.07718	7.55165	6.66413	7.54817	7.0462
YER105C	9.98903	9.90263	9.79641	9.65702	9.91019	9.83236
YER106W	6.39632	8.35404	8.56906	6.0878	6.29167	5.80826
YER107C	8.45682	8.29377	8.25999	8.46637	8.68702	8.57116
YER109C	8.10952	8.26803	8.15073	8.27908	8.32588	8.0947
YER110C	10.6281	9.61936	9.3053	10.9165	11.5254	10.7405
YER111C	7.63563	7.29599	7.88848	7.2464	7.54441	7.96691
YER112W	8.93966	8.8698	9.05159	8.75901	8.9492	9.18198
YER113C	8.90722	8.6739	8.64565	8.45236	8.52419	8.19838
YER114C	9.43134	8.70438	8.73733	9.35256	9.51702	9.18665
YER115C	7.87643	7.94251	8.04417	8.68299	8.47665	8.41292
YER116C	6.6966	7.26474	7.22359	6.97496	7.08952	7.18164
YER117W	12.0187	11.5404	12.1392	11.9885	12.32	12.0497
YER118C	8.34703	7.99974	8.4606	8.09346	9.19286	8.10101
YER119C	8.38551	7.87036	7.97047	7.99529	7.0977	7.82197
YER120W	11.1602	10.8202	10.7178	11.1136	11.1136	10.8537
YER122C	9.5982	9.4536	9.21546	9.85535	10.0075	9.84879
YER123W	8.22453	8.19453	8.57695	8.57994	8.59974	8.67869
YER124C	10.0258	9.8315	9.01269	9.85673	10.0661	9.92988
YER125W	10.1057	9.12423	9.56113	10.0784	9.71868	10.1727
YER126C	9.50775	8.7633	9.19697	10.2999	10.986	10.0068
YER127W	8.19887	8.21635	7.63541	8.88095	9.3362	8.08046
YER128W	6.5517	7.40554	7.4798	7.56165	6.70532	6.69417
YER129W	7.36813	7.27535	6.86979	7.35192	7.97374	7.56797
YER130C	7.59297	6.82082	7.38605	10.4639	9.57151	9.63741
YER131W	11.9349	11.6733	11.9329	12.0733	12.4404	11.9409
YER132C	8.47415	8.57265	8.16119	9.22449	8.95952	8.84894
YER133W	10.2635	9.90939	10.2647	10.2219	10.7977	10.6372
YER134C	7.63299	6.70109	7.34515	8.04405	7.74916	8.04984
YER136W	10.0079	9.38281	9.7151	9.42213	9.41977	10.0517
YER137C	7.99247	9.40313	8.5333	8.42577	8.83689	7.89018
YER138W-A	11.4763	12.291	12.0205	11.9338	10.8174	11.551
YER139C	6.65259	6.97198	7.4108	6.77048	7.12961	7.23998
YER140W	8.24475	8.59394	8.26665	7.96403	8.02321	7.86426
YER141W	9.92387	9.75717	9.62619	9.05726	8.66711	9.62048
YER142C	8.00362	9.26631	8.10476	6.73469	5.86873	7.51832
YER143W	7.33085	7.55931	7.49831	6.58495	6.41985	7.05524
YER144C	8.80227	8.29015	8.67757	8.60187	8.13416	8.59466
YER145C	11.451	11.1282	9.972	11.2399	10.4882	11.4159
YER146W	9.59597	9.47991	8.91836	9.72415	9.6886	9.53479
YER147C	7.14024	7.96392	6.68495	7.67087	7.67052	7.48172
YER148W	10.4074	10.1506	9.94207	10.4524	11.0111	10.32
YER149C	7.87232	8.61183	8.35979	8.2102	8.93775	8.24325
YER150W	7.60216	7.96052	8.05139	8.60123	11.5442	10.5187
YER151C	9.29214	9.05474	9.10752	9.47381	9.42412	9.34425
YER152C	8.85404	8.26043	8.23427	9.20141	8.4065	8.90068
YER153C	5.82167	6.1396	6.19359	5.86632	5.57231	5.7307
YER154W	9.00351	8.00526	8.12553	9.10969	8.3011	8.37947
YER155C	10.1991	9.33138	9.82948	10.0336	10.0679	10.2313
YER156C	9.36043	7.87809	8.25656	9.44664	10.4332	8.04564
YER157W	7.10162	7.14438	7.05356	7.23526	7.91915	7.44239
YER158C	8.68329	8.43437	8.40949	10.3474	9.66036	10.0908
YER159C	9.77645	9.59203	10.4259	10.6621	10.8275	10.7373
YER161C	7.52015	6.47389	7.09045	7.9166	8.18738	8.08939
YER162C	7.92312	7.66687	7.50702	7.6318	7.56118	8.03801
YER163C	7.56892	7.28123	7.4094	7.94029	7.64898	7.76838
YER164W	9.74815	9.22221	8.97392	9.93843	9.7594	9.78495
YER165W	12.0536	11.3037	11.183	11.9349	12.1138	11.9773
YER166W	10.1059	10.1024	9.54414	10.2231	9.96815	10.2625
YER167W	9.43218	11.7963	10.9507	9.35502	9.45567	9.28617
YER168C	7.70592	7.97507	7.83712	8.15059	8.6063	8.52286
YER169W	7.86891	8.21326	8.52045	8.92748	8.61325	8.6014
YER170W	7.46911	7.24633	7.2481	6.59316	7.35895	7.08833
YER171W	8.20244	7.87659	7.50503	8.21062	8.69165	8.01144
YER172C	9.83248	8.84773	8.38833	9.88511	10.0742	9.8909
YER173W	7.58746	7.88577	8.08819	7.64144	7.90008	7.83554
YER174C	7.99972	8.02898	8.53397	9.22093	8.51617	9.93092
YER175C	8.21615	8.18917	8.14305	9.74942	7.96896	10.8216
YER175W-A	2.50663	2.81194	3.22653	2.42763	2.57107	2.81993
YER176W	8.17524	8.24599	7.8832	9.25027	8.66064	9.28257
YER177W	10.8572	11.7604	11.5885	11.3918	10.7808	11.3848
YER178W	12.5467	12.0175	11.7642	11.899	11.4828	11.894
YER179W	5.13739	7.58453	6.60922	5.50394	4.60523	5.34519
YER180C-A	4.77149	6.30293	5.8952	4.62225	4.47348	4.99667
YER180C	7.52377	8.1012	8.15027	7.63846	8.14601	7.83185
YER182W	8.59008	8.417	8.65628	7.53465	7.70262	7.58877
YER183C	8.87856	7.4242	8.48222	8.99935	9.17882	8.60486
YER184C	5.65027	7.3285	7.08392	6.09911	5.61853	6.20457
YER185W	6.1396	7.62618	7.81517	6.11899	5.24118	6.2454
YER186C	8.4023	8.26976	7.96257	9.20206	8.57112	8.84875
YER187W	7.41062	7.8856	7.30803	7.27285	7.84352	7.34513
YER188C-A	6.10062	8.22743	8.45692	6.50523	5.10842	5.74672
YFL001W	7.90216	7.60525	7.28539	8.07162	8.38701	7.69494
YFL002C	8.77423	8.60285	8.26859	8.90017	9.44121	8.81879
YFL003C	5.05555	6.56	7.48348	5.65027	5.91205	5.9209
YFL004W	10.5116	10.316	9.96819	10.2289	10.0965	10.3963
YFL005W	9.82323	9.45224	9.59929	9.9085	9.96048	10.0013
YFL007W	9.89221	9.76699	9.67407	9.45138	8.88041	9.22364
YFL008W	9.25669	8.63557	8.63417	9.03764	9.75306	9.22682
YFL009W	9.4869	8.61775	9.06946	9.46342	9.47612	9.61828
YFL010C	9.64446	8.81897	9.27085	10.0425	9.58884	10.0555
YFL010W-A	6.4357	10.7307	11.0194	7.59	8.24669	9.05829
YFL011W	5.39809	7.2052	6.98384	4.52646	4.28639	4.51798
YFL012W	5.71841	7.27407	7.49406	6.03024	6.29554	5.58282
YFL013C	8.66583	8.94584	8.75903	8.82429	8.90561	8.92579
YFL014W	12.9881	12.9296	13.1886	12.2599	11.668	11.326
YFL016C	9.17631	8.27114	8.34658	8.61271	9.13499	9.3667
YFL017C	8.84102	8.32103	8.29997	8.60771	8.73549	8.53674
YFL017W-A	8.97346	8.36987	8.45595	8.54133	8.45187	8.39565
YFL018C	11.7117	11.4683	11.3343	11.0226	10.2705	10.8509
YFL020C	5.39054	6.54702	7.08959	5.79731	5.51091	5.9868
YFL021W	8.17949	8.98029	8.25696	9.84882	9.33069	9.3213
YFL022C	10.191	9.55139	9.0206	10.4793	10.3581	10.092
YFL023W	8.27136	8.25473	7.71617	8.52426	9.13729	8.01957
YFL024C	9.04248	9.98373	7.96841	8.27505	8.24736	8.21345
YFL025C	8.64447	8.91243	8.63168	8.57375	8.99838	8.86047
YFL026W	6.17402	7.73648	7.71622	6.41803	6.63557	6.32492
YFL027C	7.81766	7.48862	8.01121	7.96001	7.88854	7.96001
YFL028C	9.11786	8.17193	8.64758	9.52593	9.06078	9.40565
YFL029C	6.98741	7.24633	6.96288	7.17061	6.65056	6.95414
YFL030W	10.721	10.4229	10.3219	7.98743	6.80502	7.63488
YFL031W	9.55605	7.97241	8.02811	11.5594	10.7338	11.5696
YFL033C	8.50585	7.85752	7.97907	8.49277	7.88464	8.64382
YFL034C-A	10.1506	10.1679	10.7089	10.6627	10.34	9.54446
YFL034C-B	8.43179	7.98789	8.14586	8.85837	8.96136	8.12653
YFL034W	8.36147	8.47401	8.58933	8.01695	7.61643	8.26873
YFL036W	10.1155	10.1787	9.53073	9.61472	9.32718	9.51519
YFL037W	11.2758	10.161	10.5301	11.073	11.4328	11.0408
YFL038C	11.644	10.9108	11.5828	11.2994	11.4627	11.4869
YFL039C	12.9367	12.6927	12.5931	12.9164	12.5431	12.8522
YFL040W	5.19515	7.10665	7.19889	4.84825	5.19013	4.6369
YFL041W-A	6.57843	7.91644	7.44946	6.8559	6.2793	7.4795
YFL041W	9.90614	9.44937	8.87577	9.77426	8.96015	10.0786
YFL042C	9.04273	8.99219	8.81491	7.87779	7.31367	8.37977
YFL044C	7.25816	6.54521	7.2542	7.36254	7.01121	7.22238
YFL045C	11.1832	10.573	10.0976	11.7225	12.1766	11.817
YFL046W	8.596	8.24198	8.84407	8.74212	8.92929	8.60326
YFL047W	7.86731	8.09118	8.05731	7.91735	8.00253	7.64659
YFL048C	8.61018	8.36213	8.90209	8.71199	8.62606	8.79385
YFL049W	8.29433	8.36115	8.59197	8.26694	8.67313	8.58872
YFL050C	5.52684	6.62447	6.34878	6.1103	6.27616	6.11177
YFL051C	4.52649	7.91211	7.48515	4.32502	3.84529	4.22361
YFL052W	6.10997	6.97822	7.26225	4.65321	5.27987	5.5665
YFL053W	4.69908	5.48316	6.26678	4.86927	4.71866	4.29389
YFL054C	8.37009	8.31184	8.08174	7.30843	7.28824	7.40717
YFL055W	7.49744	7.79657	6.96288	6.65454	7.0235	6.52146
YFL056C	4.81182	5.95437	6.24479	4.49583	4.99415	5.73353
YFL059W	7.89329	7.93858	7.7385	7.58746	7.22309	7.14835
YFL060C	7.62532	8.80096	9.20073	7.45854	7.6498	7.71753
YFL061W	5.78884	6.60309	7.45363	5.38286	5.6009	5.55114
YFL062W	10.8797	11.6912	11.2902	11.1726	10.5312	11.2445
YFL064C	5.02736	8.48004	9.00782	4.96047	4.66282	5.57512
YFL065C	7.61006	9.96637	10.4898	7.09656	6.76599	7.84753
YFL067W	6.73211	10.9288	11.6189	7.17855	7.04975	7.43055
YFL068W	7.44755	11.5708	12.1225	8.11243	8.53856	9.52072
YFR001W	9.01692	8.61125	8.88391	8.79127	9.596	8.75094
YFR002W	9.43234	8.91053	8.52113	9.2731	9.2576	9.12399
YFR003C	7.26535	7.86434	7.47621	7.79227	6.58739	7.98091
YFR004W	9.99346	9.55217	9.95829	10.1494	9.7228	10.3599
YFR005C	7.59107	8.50097	7.47154	7.92599	8.43148	7.61829
YFR006W	10.2768	9.48378	9.69556	10.0202	10.2391	9.97799
YFR007W	7.77767	7.98142	8.33366	7.79657	7.05847	7.6746
YFR008W	5.77109	5.66996	6.58052	5.9505	5.65027	6.77161
YFR009W	9.90009	9.5823	9.37181	10.1746	10.4241	10.2127
YFR010W	9.74831	8.96323	9.40425	9.87202	9.41116	10.1037
YFR011C	10.3004	9.1277	9.92506	9.54801	9.35349	8.9081
YFR012W-A	5.51599	7.10424	7.05036	6.1396	6.51929	5.98127
YFR012W	5.30497	7.77092	8.05237	5.00636	5.40179	5.08116
YFR013W	7.6361	8.22801	7.6018	7.06655	7.74539	7.57406
YFR014C	9.48929	8.97274	9.3069	7.70295	7.58864	8.61638
YFR015C	9.24602	8.74319	9.00278	7.23655	7.63645	8.69211
YFR016C	9.16232	9.15178	9.19154	8.86358	8.4312	8.91545
YFR017C	8.04538	8.24301	7.86165	7.03857	7.66527	8.34845
YFR018C	7.93254	7.2234	7.10398	8.13185	7.95161	8.13955
YFR019W	9.2003	8.52915	8.55129	9.13505	9.09833	9.40988
YFR021W	7.54223	7.23988	6.8012	7.62296	6.6435	7.1562
YFR022W	6.29238	6.63905	6.62593	6.94013	6.53379	6.68833
YFR023W	6.00317	7.35238	7.39355	6.5465	6.48661	6.37987
YFR024C-A	9.19518	8.03494	8.00255	9.13003	7.97877	9.5609
YFR025C	8.05075	7.62754	8.01584	9.01305	8.56311	9.10389
YFR026C	5.9821	7.51832	7.16761	8.11536	6.44844	6.571
YFR027W	6.51595	7.21269	6.43598	6.19313	7.26688	6.72336
YFR028C	8.34333	8.17434	8.12006	8.65852	8.73339	8.20437
YFR029W	8.34325	8.4622	8.30664	9.07277	8.5234	8.99812
YFR030W	11.3744	11.2762	11.3041	10.9616	11.6827	11.1427
YFR031C-A	12.8285	12.403	12.2158	12.6677	12.9501	12.6731
YFR031C	9.45983	9.88475	9.58135	9.42589	9.87326	9.51208
YFR032C-A	11.6128	11.9756	12.2845	12.0939	12.4783	12.1398
YFR032C-B	3.69682	5.15131	6.09966	3.85519	4.59501	3.50469
YFR032C	4.37632	6.13619	6.25323	4.29628	4.35977	3.70158
YFR033C	11.5941	11.7731	11.5682	11.1953	10.7128	10.5696
YFR034C	8.67522	7.36022	7.4581	8.90319	9.08164	8.63821
YFR035C	5.10221	7.17743	7.5656	4.6452	5.66783	5.68808
YFR036W	6.8897	7.36992	7.59944	7.92354	7.44241	7.38741
YFR037C	8.76418	10.0942	9.19899	9.16216	8.6854	9.02801
YFR038W	7.97918	8.23488	6.92518	7.99811	7.9733	7.92127
YFR039C	8.49498	8.22373	7.92729	8.55656	8.45032	8.89125
YFR040W	9.59392	9.22424	8.50159	8.92159	9.20132	8.82434
YFR041C	8.50911	8.7147	8.59042	8.85735	8.55301	8.88831
YFR042W	7.97538	8.5676	8.75097	8.35174	7.97167	8.04166
YFR043C	7.64277	7.98567	8.39025	8.23303	7.98164	7.89023
YFR044C	11.8084	11.0832	11.1722	11.128	10.2905	10.9716
YFR045W	7.29382	8.31523	7.81351	6.95475	6.18456	6.85434
YFR046C	7.39457	7.64639	7.48515	7.31052	7.82402	7.34677
YFR047C	11.2587	11.5563	11.1427	10.6746	10.442	10.6524
YFR048W	9.00061	9.13904	8.86123	9.27755	9.16629	9.24587
YFR049W	10.9643	11.322	11.0948	9.60832	9.47873	9.8859
YFR050C	10.1723	9.5282	9.91923	10.0787	9.42925	10.2816
YFR051C	10.2895	9.70389	9.3495	10.4166	9.9169	10.2071
YFR052W	9.37749	8.64265	9.63024	9.72765	9.13473	9.77354
YFR053C	12.7879	12.2827	12.4396	10.7314	11.2163	12.0602
YFR055W	6.57357	6.64905	6.9234	8.09317	8.8616	8.17407
YFR057W	3.48639	5.87604	6.43372	2.8764	3.05375	3.06762
YGL001C	8.94309	7.41362	8.4528	9.10192	8.91563	9.15269
YGL002W	8.09518	7.39918	7.38324	7.94491	7.75521	8.00345
YGL003C	8.23478	8.18795	7.99716	8.12571	7.95275	8.28236
YGL004C	8.1799	8.89532	8.57317	8.32738	7.91886	8.64936
YGL005C	8.19877	8.38051	8.37637	7.85377	8.17261	8.31463
YGL006W-A	3.91968	5.40478	5.84709	3.21578	3.01512	3.35787
YGL006W	10.4186	9.53052	9.81972	9.70713	8.29746	9.91277
YGL007C-A	9.06957	10.9085	9.93528	8.46198	7.73911	7.36944
YGL008C	11.932	11.5132	11.3517	12.4753	12.16	12.3627
YGL009C	9.96981	9.15422	10.3729	11.7204	10.6794	12.085
YGL010W	7.13019	7.38186	8.02829	6.52864	6.48228	7.1678
YGL011C	10.4181	9.27854	9.70552	10.4632	10.1796	10.4481
YGL012W	10.9735	10.1756	10.2802	10.9956	10.8452	10.6792
YGL013C	9.09161	9.27763	9.21617	9.1486	9.00918	9.1015
YGL014W	9.8861	9.7466	9.54332	10.0358	10.2601	9.97237
YGL015C	4.05153	7.12498	7.15473	4.50368	4.88323	4.66198
YGL016W	8.59874	8.19009	7.99398	8.02338	8.36511	7.93034
YGL017W	7.24726	7.26512	7.06474	8.02555	7.6258	7.74971
YGL018C	7.46079	7.49417	7.77088	7.50886	7.48147	7.2362
YGL019W	9.87189	9.07948	9.28965	9.68122	9.67476	9.3616
YGL020C	8.95856	8.18348	8.72845	8.99578	9.17328	8.95927
YGL021W	8.62747	8.42533	8.5852	8.5322	8.89861	8.85538
YGL022W	10.7144	10.0011	9.87856	10.6628	10.5223	10.476
YGL023C	8.98972	8.71148	8.53984	9.31408	9.24265	9.07838
YGL025C	7.56505	7.82503	7.08594	7.98415	7.73222	7.82185
YGL026C	11.5432	10.9683	10.6613	11.626	11.095	11.6965
YGL027C	8.74043	7.96327	8.24471	8.30378	9.26167	8.95097
YGL028C	10.6748	10.0703	9.78969	10.7424	10.3969	10.1318
YGL029W	7.60734	8.68689	7.93897	8.52864	9.09135	7.4041
YGL030W	12.4587	12.2849	12.3574	12.6162	12.6131	12.5432
YGL031C	12.2678	12.2935	12.2076	12.1518	12.4595	12.1595
YGL032C	6.95993	7.59963	7.5229	6.21918	5.69479	6.18099
YGL033W	4.2715	6.932	6.81095	3.24314	2.81829	2.99689
YGL035C	8.70498	8.98576	9.23175	9.80022	9.55287	9.62363
YGL036W	7.40417	7.80177	8.19017	7.37706	7.56765	7.8615
YGL037C	10.3004	10.2328	11.091	10.1063	9.66361	11.0644
YGL038C	8.67898	8.99756	8.77594	8.59512	9.80811	9.57804
YGL039W	8.63361	8.31335	8.07455	8.79768	8.27175	9.24098
YGL040C	9.95943	9.57614	9.45364	9.4703	9.3333	9.32845
YGL041C-B	5.57239	8.16925	8.10455	4.76891	5.3592	5.43201
YGL043W	8.19693	8.33527	8.2127	8.6176	9.05005	8.66942
YGL044C	7.30704	7.78874	7.51226	7.87284	8.4685	8.10734
YGL045W	7.7752	8.11549	8.54807	8.96247	8.21465	8.89349
YGL047W	8.20131	8.10153	8.53667	7.03157	6.50634	7.78552
YGL048C	10.6992	10.3489	10.2765	10.8139	10.1602	10.6721
YGL049C	9.13435	8.80654	8.70101	9.03726	8.94889	9.16396
YGL050W	8.16757	8.67911	8.32908	8.60315	8.64283	8.51978
YGL051W	4.22109	6.65052	8.29432	5.2696	5.4335	6.51959
YGL053W	7.50619	7.51169	7.90144	7.78599	6.97992	8.33563
YGL054C	10.1563	10.0504	10.5024	10.5701	10.8563	10.6327
YGL055W	11.8595	12.2101	11.8266	10.9992	10.3817	11.4847
YGL056C	9.35177	9.40633	9.53863	9.61967	9.73811	9.38541
YGL057C	7.2332	7.32033	8.11489	7.63299	7.68905	7.7347
YGL058W	8.16796	7.58624	8.19557	8.71924	9.18453	8.72927
YGL059W	8.29153	8.29499	8.66059	8.53619	7.32247	9.12853
YGL060W	7.98893	7.88528	8.37198	7.72785	8.14054	7.96289
YGL061C	7.69956	8.21594	7.94681	7.77522	8.59908	7.81956
YGL062W	12.7459	12.8153	12.483	11.6173	11.9943	11.0227
YGL063W	7.13967	7.18643	6.57899	7.25754	6.97043	6.72189
YGL064C	7.87615	8.35896	8.45954	7.89332	7.8365	7.52607
YGL065C	8.70908	8.60245	8.23212	8.87119	9.41627	8.98237
YGL066W	8.67301	8.20814	8.23104	8.68145	8.62849	8.90989
YGL067W	9.18755	9.15462	9.53233	9.42596	9.38462	9.52338
YGL068W	8.85911	8.23653	8.69696	8.68521	8.40428	8.33157
YGL070C	8.1927	7.98868	8.33344	8.38789	9.08442	8.07406
YGL071W	9.32867	9.69731	9.03571	9.93983	9.39521	10.0897
YGL073W	8.6115	8.82945	8.81984	8.99859	8.37347	8.90789
YGL075C	6.09458	7.26179	7.63541	6.19073	6.84785	6.77805
YGL076C	12.6623	12.4786	12.4665	12.5165	12.858	12.5444
YGL077C	10.046	10.2314	9.60061	10.3261	10.7693	9.98831
YGL078C	9.60962	9.05563	8.89299	10.0822	11.1812	9.62216
YGL079W	8.13968	7.96481	8.24973	8.23666	8.10887	8.03527
YGL080W	9.44722	9.86815	9.79084	8.93755	9.09022	9.23889
YGL081W	5.79523	7.37711	7.32388	5.17943	4.9831	4.81099
YGL082W	8.57305	7.96009	8.0394	8.6976	8.75433	9.09303
YGL083W	7.43715	7.60238	7.53231	6.96584	6.79276	7.02239
YGL084C	8.90528	7.93903	8.32622	8.7342	7.99914	8.79414
YGL085W	7.71195	7.75616	7.53884	7.98275	7.84025	7.7738
YGL086W	8.38259	8.93418	8.68553	8.18736	8.73893	8.48446
YGL087C	9.46444	9.00069	9.89763	9.82608	9.36595	9.94496
YGL089C	5.96741	7.17618	6.65138	5.22569	4.64749	5.19344
YGL090W	6.33857	7.59658	7.29437	5.79316	6.32731	6.39643
YGL091C	7.59319	7.35759	7.49994	8.1613	8.43627	8.35186
YGL092W	10.5176	11.1525	10.2867	10.1926	10.5454	10.2669
YGL093W	9.22279	9.46852	9.38257	8.87727	9.64168	9.42263
YGL094C	8.36522	8.14873	8.32455	8.62996	8.82783	8.62117
YGL095C	8.0977	7.86963	8.47955	8.34129	7.94772	8.44714
YGL096W	7.43546	8.81793	8.61665	8.11242	7.58443	8.35896
YGL097W	9.42316	8.18192	8.2928	9.47841	9.95931	9.24279
YGL098W	7.03778	8.66041	7.77942	6.72564	7.13695	6.86533
YGL099W	9.34111	8.75766	8.60115	9.63473	10.098	9.17672
YGL100W	8.89761	8.59991	8.76854	8.56419	8.93026	8.66936
YGL101W	7.95314	7.11106	7.50821	8.41431	8.66185	8.10068
YGL103W	12.2223	11.8574	12.1208	12.3481	12.4414	12.1664
YGL104C	7.38172	7.61261	7.84027	6.83237	5.62254	7.02242
YGL105W	10.9233	9.95455	10.2736	10.5808	10.927	10.5663
YGL106W	8.55064	8.08722	8.13925	9.00358	8.95903	8.85873
YGL107C	8.7364	8.71696	8.56382	8.59502	8.53332	8.45686
YGL108C	7.10136	6.60694	6.60804	7.29667	7.34137	7.32523
YGL110C	7.58524	7.52377	6.82469	7.59871	7.51607	7.46763
YGL111W	8.5649	8.24871	8.33144	8.99011	9.86797	8.65794
YGL112C	8.26843	6.57237	7.4759	8.87319	8.87736	8.47014
YGL113W	7.16596	7.39227	7.62055	7.41341	7.4689	7.11162
YGL114W	9.02443	8.91262	8.19535	8.83195	8.48519	8.705
YGL115W	8.453	7.52591	7.9708	8.19532	8.17568	8.38018
YGL116W	7.63037	7.70353	7.67175	7.6117	7.63515	7.65305
YGL117W	9.65003	10.2831	10.5768	10.725	9.48058	10.7927
YGL119W	8.8209	8.82033	8.37005	9.02246	8.44666	8.70743
YGL120C	9.30695	10.2326	8.82808	10.289	10.6832	9.40528
YGL121C	8.48215	8.54926	8.8072	9.8314	7.60247	9.62445
YGL122C	9.28223	10.2581	9.54213	10.2045	10.0675	9.77041
YGL123W	12.277	11.9767	12.2505	12.4182	12.6109	12.319
YGL124C	7.19824	7.48381	7.22297	7.39113	7.05985	7.31589
YGL125W	9.56689	8.02744	9.14274	10.8903	10.4033	10.6415
YGL126W	7.44625	6.73469	6.74547	9.46565	7.18363	8.65774
YGL127C	7.44992	7.46748	7.69517	8.73397	7.55415	7.98636
YGL128C	7.15217	8.40922	8.32291	7.89683	7.07145	7.64284
YGL129C	9.22454	8.37591	8.62205	8.63129	8.62303	8.71653
YGL130W	8.45275	8.39599	8.04013	8.41116	8.36371	8.52482
YGL131C	7.97992	8.07948	8.50135	8.32832	8.05708	8.00628
YGL133W	8.81296	8.85279	8.78573	10.2631	9.26632	9.51551
YGL134W	8.70726	9.62577	8.92503	8.53939	8.52048	8.40577
YGL135W	12.7314	12.6937	12.7028	12.6851	12.817	12.7058
YGL136C	7.44846	8.05261	8.07958	7.53958	7.24271	7.85982
YGL137W	10.7557	10.2837	9.87435	10.401	10.3306	10.3796
YGL138C	3.97157	6.33006	6.84187	3.59492	3.19506	3.25899
YGL139W	8.14909	7.67563	7.97493	8.75231	8.89117	8.58465
YGL140C	9.13827	8.25684	8.26551	9.49577	9.26226	9.59103
YGL141W	8.44086	8.64031	8.56604	8.487	7.77836	8.72593
YGL142C	8.1649	7.96918	8.46745	7.86425	7.77819	8.11579
YGL143C	8.6257	8.70456	8.51192	7.80822	7.85466	7.69943
YGL144C	7.96192	8.55369	7.79041	7.81026	8.30909	8.00161
YGL145W	7.64863	7.96481	8.35333	7.77976	8.51504	7.87981
YGL146C	7.412	8.14138	8.03492	6.17793	6.15815	6.80729
YGL147C	11.3177	10.6687	11.1397	11.2507	11.9568	11.2616
YGL148W	10.4397	9.71938	9.48212	10.3025	10.574	10.1266
YGL150C	9.49007	8.96	8.66059	9.47739	9.2751	9.35175
YGL151W	8.67386	8.36465	8.48337	8.20246	7.94466	8.3699
YGL153W	9.43289	10.0305	9.74506	8.93372	8.79927	9.13704
YGL154C	7.98599	9.04211	9.03365	7.24633	8.16397	8.18597
YGL155W	6.99352	6.92576	6.91167	7.67002	8.07755	7.56681
YGL156W	9.65109	8.77106	8.94744	9.45601	6.95999	9.15747
YGL157W	6.25122	7.69022	7.66852	9.87652	8.52332	9.15286
YGL158W	3.73997	6.22817	6.88393	5.63292	5.24881	4.81078
YGL159W	7.71938	8.1281	7.80412	7.87743	7.816	8.02051
YGL160W	8.40203	8.60123	8.49582	8.0796	7.88796	8.17542
YGL161C	9.63334	9.49987	9.18375	9.57678	8.99799	9.89668
YGL162W	7.43601	7.85892	8.13567	8.26834	8.32867	8.56833
YGL163C	8.42346	8.51484	8.45351	8.33329	8.64985	8.4702
YGL164C	8.21507	8.85014	8.58479	8.52877	8.44132	8.58886
YGL166W	7.25648	7.94105	7.58659	8.95584	8.32259	9.02076
YGL167C	10.0882	10.2171	9.41717	10.1886	9.91089	10.3883
YGL168W	5.62053	9.0086	9.37681	6.66413	7.48031	8.25502
YGL169W	7.27301	7.28054	7.30137	8.10634	8.56128	7.89114
YGL170C	4.45111	6.06796	6.86481	3.54631	3.80739	3.67849
YGL171W	8.48859	8.73304	8.35981	8.63757	9.70744	8.24742
YGL172W	8.89677	8.59518	8.79161	9.26703	9.21503	9.09622
YGL173C	10.8672	10.4579	10.5059	10.6864	10.4884	10.5046
YGL174W	6.84898	6.77662	6.59857	6.85238	7.62022	7.159
YGL175C	5.60619	7.60732	7.54044	5.41888	5.82289	5.31389
YGL176C	7.65886	7.24633	7.72176	7.85653	8.02513	7.66575
YGL178W	8.2393	9.81339	9.42456	9.50106	9.57892	9.49381
YGL179C	7.06457	7.76992	7.2893	8.21199	6.65547	7.69443
YGL180W	8.28888	7.41668	8.17492	8.10328	6.92818	9.23569
YGL181W	8.08739	7.79657	7.9441	8.16798	7.91129	8.70623
YGL183C	3.60318	6.38004	6.52355	4.29389	4.88011	5.67178
YGL184C	7.96	7.53195	8.09785	8.58505	9.34719	10.1369
YGL185C	7.63664	7.81922	7.76039	7.51975	7.65452	7.90916
YGL186C	9.20627	9.46041	9.0346	9.76278	9.40317	10.2569
YGL187C	11.5505	10.3343	11.5046	11.2761	11.2051	11.1525
YGL188C-A	1.77004	3.11203	2.63681	2.87169	2.91582	2.60171
YGL189C	12.086	12.1014	12.4235	12.0986	12.4209	12.0783
YGL190C	9.0952	8.76345	8.83077	8.74911	8.89646	9.0959
YGL191W	10.9654	10.6947	10.8164	10.6606	10.9281	10.5612
YGL192W	7.57017	6.98609	7.24859	7.34265	7.57731	7.62498
YGL194C	5.30811	7.48071	7.60221	5.36266	4.89444	5.73435
YGL195W	10.5032	9.996	9.81271	10.5262	10.5672	10.5378
YGL196W	8.99192	8.64265	8.96607	9.04371	8.76489	8.94969
YGL197W	9.91692	10.0767	9.65015	9.558	9.17222	9.66489
YGL198W	9.47215	8.59991	9.15286	9.14059	8.62726	9.16757
YGL200C	10.5806	9.90736	10.263	10.4873	10.4887	10.1526
YGL201C	8.96223	8.75201	8.53947	8.66968	8.31467	8.63591
YGL202W	11.0043	10.9111	10.3631	11.1192	10.755	11.2049
YGL203C	8.26149	8.75218	8.32993	8.54403	8.39803	8.57112
YGL205W	11.179	10.7008	10.5013	5.61668	5.49187	5.92924
YGL206C	10.7757	9.71825	10.0424	10.661	10.0375	10.8615
YGL207W	10.1081	9.69394	9.30428	9.55443	10.0508	10.0127
YGL208W	7.89442	7.91629	8.36383	7.65378	7.05434	7.87018
YGL209W	5.11508	6.4453	7.0863	10.8248	10.1542	9.20971
YGL210W	8.02855	7.70576	7.71075	8.7552	9.11901	8.45997
YGL211W	7.84463	7.26905	7.38386	8.25697	8.60466	7.8657
YGL212W	6.10579	7.09971	6.80421	6.40195	6.63585	6.82196
YGL213C	8.55994	7.88963	8.39613	8.75921	9.04848	8.82493
YGL215W	9.46726	10.9746	10.2372	10.4694	10.651	10.3801
YGL216W	8.24353	8.26687	8.46712	8.22737	8.84498	8.42836
YGL219C	9.59799	8.81258	9.18941	9.60251	9.26052	9.7422
YGL220W	8.72217	8.40241	8.59982	8.77769	8.41731	8.15937
YGL221C	9.86698	9.38412	9.67438	9.95821	9.71176	9.78268
YGL222C	4.57333	7.24633	7.06068	4.78922	4.05357	4.64072
YGL223C	7.67518	7.52609	7.91561	7.75218	7.71349	7.77573
YGL224C	6.93989	6.96135	6.93648	7.79027	6.96617	7.98833
YGL225W	9.95814	9.45362	9.49213	10.0113	10.5444	9.95839
YGL226C-A	9.89119	9.54755	10.322	9.82899	10.2277	9.707
YGL226W	8.34872	8.32493	8.41978	7.60888	7.74562	7.84334
YGL227W	9.0066	8.4264	8.89168	7.51042	7.38772	8.48799
YGL228W	9.33694	8.77034	8.91175	9.61064	9.42034	9.74917
YGL229C	7.32342	7.38225	7.93565	6.35047	5.0571	6.60455
YGL230C	5.19792	7.96229	8.1432	4.67491	5.15963	5.28825
YGL231C	9.5455	9.67902	9.9237	9.95703	9.83847	9.92191
YGL232W	8.82118	8.63734	9.37861	8.86417	8.82403	8.80852
YGL233W	8.93402	9.11124	8.65361	8.79422	8.83836	8.86951
YGL234W	11.5088	11.2754	10.7468	11.7822	12.2067	11.7693
YGL235W	3.07045	6.26226	6.88636	3.54859	3.05576	3.42373
YGL236C	8.77807	8.67867	9.13893	7.77368	7.77577	7.52993
YGL237C	8.03856	8.05799	7.8343	7.64318	7.97995	8.33874
YGL238W	10.1525	10.134	10.0228	10.0934	10.1931	10.1512
YGL240W	4.70296	6.76088	6.84964	4.68413	4.17175	4.28638
YGL241W	8.48646	8.95635	8.1404	8.67607	8.06731	8.7069
YGL242C	9.20284	8.5702	9.17385	9.37782	8.82601	9.06519
YGL243W	7.71201	8.72171	8.70101	8.54534	8.48917	8.29139
YGL244W	9.59024	9.45548	9.74143	9.45107	9.65219	9.72548
YGL245W	11.9984	12.0783	11.7953	11.8109	11.6267	11.8164
YGL246C	7.63312	6.47013	6.46394	7.91135	8.39383	7.65118
YGL247W	7.73582	8.93088	8.7004	7.82661	7.98304	7.96781
YGL248W	8.30909	8.69945	8.49423	8.38569	8.48314	9.15472
YGL249W	5.16762	6.85733	7.29777	6.11985	5.65695	6.23273
YGL250W	7.35544	7.23623	7.96361	6.69166	6.05306	7.3578
YGL251C	5.90885	6.47426	6.5509	6.43327	6.20913	6.237
YGL252C	9.14128	8.80666	8.49593	9.05452	9.07243	9.25544
YGL253W	12.2198	11.812	11.2442	12.1017	12.2701	12.2274
YGL254W	6.70042	7.68509	7.80098	6.6062	6.65718	6.90231
YGL255W	12.7677	12.8113	12.7613	13.3517	13.2907	13.3669
YGL256W	7.40707	8.08842	7.95031	12.8536	12.2214	12.5455
YGL257C	7.63402	6.57237	7.15143	9.21568	8.87745	9.28317
[truncated: 3,669 more rows]

## Sheet: Significance analysis
ORF	C vs N		ORF	qdr vs pdr		933 ORF
YGL086W	9.74646e-05		YGL086W	8.65627e-06		YAL005C
YER163C	0.00010098		YHR027C	0.000204032		YAL014C
YLR284C	0.000102075		YHR176W	0.000485541		YAL017W
YLR292C	0.000180168		YPL060W	0.000566727		YAL021C
YJL058C	0.000199395		YDR400W	0.000754812		YAL034C
YPR025C	0.000200015		YDR349C	0.00115764		YAL038W
YGL143C	0.000201191		YIL161W	0.00118455		YAL039C
YMR266W	0.000223979		YLR335W	0.00124958		YAL041W
YPL200W	0.000312785		YBL005W	0.00166913		YAL047C
YJL024C	0.000374105		YNL251C	0.0017536		YAL054C
YNL250W	0.000395956		YHR068W	0.00209216		YAL055W
YOL011W	0.000415682		YJL066C	0.00218897		YAL059W
YOR120W	0.000465389		YJR043C	0.00219752		YAL067C
YPL201C	0.000468996		YFR024C-A	0.00247127		YAR002C-A
YPR082C	0.000557056		YOR137C	0.00247858		YAR009C
YPR006C	0.000584112		YGL087C	0.00249514		YAR014C
YNL270C	0.000606578		YOR330C	0.00259829		YAR035W
YLR304C	0.000763211		YFR050C	0.0026143		YBL002W
YDR088C	0.000807198		YDR129C	0.00291725		YBL005W
YPR001W	0.000825875		YPL183W-A	0.00323527		YBL008W-A
YLR174W	0.000846525		YOR338W	0.00327464		YBL015W
YIL070C	0.00090414		YER163C	0.00398566		YBL030C
YLR224W	0.000922994		YJL042W	0.00418163		YBL037W
YHR179W	0.000935014		YDR459C	0.00419518		YBL039C
YML054C	0.000978934		YOR113W	0.00438926		YBL039W-A
YOR031W	0.00106297		YER149C	0.00519159		YBL045C
YDL090C	0.0011432		YOL087C	0.00558325		YBL057C
YDL048C	0.00117392		YLR064W	0.00573521		YBL059W
YBR255C-A	0.00119496		YDR158W	0.00591381		YBL064C
YDR337W	0.0012221		YAL017W	0.00601681		YBL080C
YBR037C	0.0013459		YDR126W	0.00606042		YBL085W
YOL086W-A	0.00142121		YDR337W	0.0060897		YBL093C
YJL056C	0.00142562		YKL168C	0.00646818		YBR010W
YJL098W	0.00143284		YDR035W	0.00651399		YBR033W
YMR243C	0.00151261		YKL029C	0.00664178		YBR037C
YKL029C	0.00172802		YMR315W	0.00708323		YBR042C
YGL009C	0.00174856		YML072C	0.00736437		YBR043C
YPL250C	0.00200377		YOR047C	0.0075906		YBR050C
YGR232W	0.00203268		YHR087W	0.00762482		YBR054W
YLR087C	0.00204602		YNL122C	0.00762607		YBR056W-A
YBL064C	0.00208463		YDR304C	0.00784078		YBR068C
YOR374W	0.00211831		YCR005C	0.00817019		YBR069C
YMR303C	0.00214815		YIL076W	0.00832953		YBR095C
YFR025C	0.00222306		YBR183W	0.0084718		YBR098W
YPL147W	0.00229587		YLR258W	0.00875925		YBR105C
YKL217W	0.00231758		YDR384C	0.00912029		YBR107C
YDL115C	0.00236743		YAL038W	0.00944964		YBR120C
YIR035C	0.00239217		YBR010W	0.0104101		YBR137W
YJR095W	0.00244063		YPL269W	0.0104649		YBR138C
YFL052W	0.00244504		YLR333C	0.0105438		YBR148W
YAL054C	0.00247764		YFR004W	0.0108005		YBR155W
YHR147C	0.00247887		YAL021C	0.0108765		YBR157C
YBR010W	0.00250215		YOR109W	0.0109174		YBR183W
YBL015W	0.00250233		YLR292C	0.0110572		YBR185C
YGL154C	0.00260368		YBR050C	0.0111085		YBR208C
YKR009C	0.00268117		YLR016C	0.011201		YBR225W
YPR031W	0.00268532		YJL005W	0.0114347		YBR230C
YHL016C	0.00273747		YML015C	0.0115009		YBR230W-A
YJL217W	0.00275389		YDL115C	0.0116119		YBR233W-A
YCL005W	0.00286741		YOR230W	0.012121		YBR242W
YDR384C	0.00299395		YML059C	0.012128		YBR255C-A
YMR234W	0.0030323		YBR042C	0.0126861		YBR261C
YGL044C	0.00308754		YGR232W	0.0129491		YBR264C
YOL133W	0.00312646		YPL018W	0.0129975		YBR269C
YGL205W	0.00319355		YPL113C	0.0135225		YBR275C
YDR228C	0.00322961		YGR202C	0.0142012		YBR287W
YNR026C	0.00327916		YLR392C	0.0143144		YBR290W
YBR157C	0.00332715		YDR019C	0.0143847		YBR299W
YHR092C	0.00356292		YIL144W	0.0151925		YCL005W
YDR317W	0.00361932		YDR099W	0.0153999		YCL011C
YOR222W	0.00373428		YNL182C	0.0154785		YCL029C
YMR204C	0.00380729		YDR409W	0.0155316		YCL031C
YKL187C	0.00383105		YJL024C	0.0156037		YCL056C
YDR173C	0.0040154		YOR252W	0.0159372		YCR004C
YKL219W	0.00427019		YOR079C	0.0159845		YCR005C
YKL175W	0.00432684		YEL066W	0.0162461		YCR009C
YMR166C	0.00433252		YFR031C	0.0163856		YCR010C
YLL012W	0.00435816		YDR179W-A	0.0166546		YCR012W
YDR536W	0.0044049		YBR068C	0.0166822		YCR016W
YHR137W	0.00441102		YIL116W	0.0166921		YCR021C
YOR025W	0.00449339		YLR270W	0.0167323		YCR024C-A
YER049W	0.00454175		YDL177C	0.0169728		YCR043C
YIR033W	0.00454445		YJL058C	0.0170389		YCR052W
YPL030W	0.00458015		YLR082C	0.0174427		YCR059C
YKL100C	0.004746		YPL103C	0.017466		YCR072C
YHR162W	0.0047966		YAR009C	0.0179031		YCR083W
YGL255W	0.00487064		YDR181C	0.0182294		YCR091W
YMR024W	0.00490624		YOL136C	0.0183533		YCR097W
YLR307W	0.00493953		YFR032C-A	0.0183791		YDL006W
YNL093W	0.00497689		YLR233C	0.0186503		YDL007W
YLR004C	0.00502282		YHR024C	0.0186919		YDL027C
YOL100W	0.00503428		YGR276C	0.0189786		YDL031W
YDL194W	0.00506157		YLR295C	0.0191183		YDL048C
YPR002W	0.00510008		YFR025C	0.01948		YDL049C
YML009C	0.00514398		YLR304C	0.0195579		YDL079C
YER130C	0.00518353		YBR043C	0.0197907		YDL085W
YJR138W	0.00521346		YGR234W	0.0199997		YDL088C
YDR519W	0.00526066		YDR519W	0.0200874		YDL090C
YOL070C	0.00534133		YNL032W	0.0201065		YDL098C
YDR155C	0.0053804		YMR091C	0.0202701		YDL107W
YDR163W	0.00543272		YFL033C	0.0203671		YDL108W
YJR024C	0.00549142		YJR046W	0.0203704		YDL111C
YDR056C	0.00556126		YDR317W	0.0204744		YDL113C
YDR383C	0.00563717		YGR289C	0.0213284		YDL115C
YDR256C	0.00575631		YDR110W	0.0215497		YDL123W
YNR016C	0.00578688		YJR141W	0.0215678		YDL130W-A
YJL181W	0.00590614		YPR171W	0.0216		YDL142C
YCR091W	0.00594297		YMR126C	0.0217045		YDL144C
YKL093W	0.00601704		YCR004C	0.0217369		YDL154W
YDR033W	0.00617299		YPL015C	0.0218552		YDL170W
YEL046C	0.00624879		YBR098W	0.0219363		YDL177C
YDR380W	0.00628392		YOL052C-A	0.022		YDL181W
YBR230W-A	0.00628638		YNL026W	0.0220386		YDL189W
YER034W	0.0062937		YOL073C	0.0221331		YDL194W
YER024W	0.00637485		YOL143C	0.0223552		YDL197C
YBR033W	0.00645569		YNL037C	0.0224617		YDL200C
YHR087W	0.00647423		YDR513W	0.0226051		YDL203C
YGL256W	0.00656357		YKR065C	0.0227114		YDL213C
YDL214C	0.00671391		YLR087C	0.0230315		YDL214C
YIL117C	0.00676286		YOR279C	0.0231218		YDL215C
YHR057C	0.00676306		YDL233W	0.0232831		YDL219W
YGR003W	0.00678602		YAR014C	0.0234173		YDL224C
YIL053W	0.00679434		YIL024C	0.0235343		YDL233W
YKL084W	0.00681502		YLR021W	0.0238287		YDL235C
YMR095C	0.00682537		YGR080W	0.0243388		YDL237W
YMR231W	0.00689478		YNL035C	0.0244233		YDR009W
YDR034C	0.00704274		YJL084C	0.0245893		YDR018C
YDR026C	0.00718756		YGR058W	0.0248508		YDR019C
YGL226W	0.00722413		YOR093C	0.024874		YDR026C
YJL026W	0.00724978		YGL026C	0.0252403		YDR033W
YPL223C	0.00735682		YDL237W	0.0268515		YDR034C
YHR032W	0.00742131		YBR107C	0.0269432		YDR034W-B
YLR194C	0.00773352		YOR306C	0.0269919		YDR035W
YDR118W	0.0079004		YBR230W-A	0.0275099		YDR037W
YML071C	0.0080326		YPL166W	0.0275356		YDR041W
YBL037W	0.00804139		YPL104W	0.027805		YDR054C
YEL057C	0.00805951		YGR153W	0.0288359		YDR055W
YIL101C	0.00810444		YER144C	0.0288373		YDR056C
YDR508C	0.00813475		YJR034W	0.0288522		YDR057W
YBL093C	0.00815051		YDR457W	0.0289509		YDR059C
YER054C	0.00823304		YDR488C	0.0292807		YDR068W
YDL215C	0.00836474		YLR222C	0.029513		YDR079W
YDR041W	0.00838304		YIL033C	0.0297166		YDR085C
YDR375C	0.00841494		YDR403W	0.02987		YDR088C
YML131W	0.00856789		YJL082W	0.0302433		YDR090C
YOR180C	0.00861656		YPL082C	0.0304601		YDR099W
YGR136W	0.00865351		YML092C	0.0305414		YDR100W
YPL206C	0.00866847		YOR286W	0.0306865		YDR110W
YLR237W	0.00885887		YEL012W	0.0311422		YDR111C
YHR003C	0.00896891		YDL154W	0.0311555		YDR118W
YBR230C	0.00904389		YCL011C	0.03181		YDR121W
YGR230W	0.00913623		YDL144C	0.0318228		YDR123C
YLR152C	0.00918615		YDL113C	0.0319568		YDR126W
YER030W	0.00918898		YJL098W	0.0322451		YDR129C
YPR182W	0.00923959		YMR033W	0.0323197		YDR132C
YDR318W	0.00926823		YDR041W	0.0325819		YDR143C
YOL019W	0.00929475		YHR012W	0.0328		YDR148C
YER027C	0.00932515		YGR047C	0.0332331		YDR151C
YHR201C	0.00934562		YIL010W	0.0335036		YDR153C
YOR281C	0.00940734		YLL018C-A	0.0335599		YDR155C
YER158C	0.00942512		YDL090C	0.0338857		YDR158W
YKR058W	0.00947164		YBR225W	0.0341866		YDR163W
YJR034W	0.00947778		YGR152C	0.0342295		YDR173C
YDL170W	0.00951065		YMR070W	0.0342489		YDR178W
YMR269W	0.00954451		YLR066W	0.0345336		YDR179W-A
YDR055W	0.00961512		YDL048C	0.0354834		YDR181C
YKL096C-B	0.00979213		YCR012W	0.0356752		YDR189W
YOR283W	0.0097952		YIR011C	0.0363672		YDR201W
YMR126C	0.00987382		YDR163W	0.0364079		YDR206W
YFL030W	0.0099525		YEL038W	0.036435		YDR214W
YKL110C	0.00998098		YDL213C	0.0366253		YDR228C
YDR151C	0.0100701		YPL077C	0.0370135		YDR240C
YMR009W	0.0101148		YDR155C	0.0372202		YDR248C
YLL055W	0.0102852		YER139C	0.0372457		YDR255C
YPR152C	0.0103846		YHL009C	0.0375718		YDR256C
YJL076W	0.0103913		YPL252C	0.0376914		YDR257C
YNL311C	0.0104927		YGR168C	0.0377985		YDR259C
YOL084W	0.0105305		YPL169C	0.0378058		YDR266C
YML087C	0.0106678		YOL122C	0.0379421		YDR304C
YDR018C	0.0107597		YHR126C	0.0379606		YDR316W
YAL034C	0.010796		YGL220W	0.0379778		YDR317W
YGR239C	0.010852		YKL008C	0.0383646		YDR318W
YMR006C	0.0109941		YDR528W	0.0384534		YDR326C
YMR149W	0.0109988		YMR298W	0.0384721		YDR337W
YNL260C	0.0111451		YLR205C	0.0384831		YDR342C
YKL072W	0.0111824		YLR085C	0.0393431		YDR345C
YGR055W	0.0112189		YKL152C	0.0394616		YDR347W
YBR261C	0.0112927		YHR187W	0.0395219		YDR349C
YGR067C	0.0113658		YGL181W	0.039634		YDR352W
YDR059C	0.0113794		YPR031W	0.0396846		YDR357C
YBR138C	0.0113854		YCL029C	0.0402188		YDR375C
YGR180C	0.011497		YDL007W	0.0403501		YDR380W
YGL257C	0.0116104		YHR076W	0.040371		YDR383C
YBR042C	0.0120253		YPL074W	0.0403763		YDR384C
YPR005C	0.0121466		YJL034W	0.0403789		YDR400W
YPL177C	0.0121499		YLR174W	0.0405718		YDR403W
YPL178W	0.0122279		YNL262W	0.0406034		YDR409W
YPR062W	0.0122474		YOR067C	0.04069		YDR424C
YIL013C	0.0122736		YER180C	0.0409479		YDR457W
YKR071C	0.0122965		YHR164C	0.0410276		YDR459C
YBR095C	0.012323		YGR278W	0.0410715		YDR463W
YJL062W-A	0.0123456		YOR276W	0.041426		YDR464W
YJL103C	0.0124072		YOR077W	0.0415095		YDR466W
YKL148C	0.0124345		YNR010W	0.0416798		YDR481C
YPL196W	0.0125143		YMR246W	0.0417117		YDR482C
YHR088W	0.01257		YGR076C	0.0423808		YDR488C
YDR034W-B	0.0125903		YML107C	0.0427789		YDR492W
YJL216C	0.012633		YDR347W	0.0428953		YDR503C
YOR215C	0.0126502		YKL196C	0.0431722		YDR508C
YER015W	0.0126864		YNL252C	0.0432667		YDR511W
YOR267C	0.0127174		YOR129C	0.0432876		YDR512C
YJR075W	0.0127903		YNL094W	0.0433012		YDR513W
YOR065W	0.0128035		YGL242C	0.0433759		YDR518W
YLR275W	0.012855		YGR143W	0.0433857		YDR519W
YGR245C	0.0129021		YBL064C	0.0433858		YDR527W
YDR240C	0.0129174		YFR013W	0.0434827		YDR528W
YLR301W	0.012965		YNL250W	0.0437896		YDR533C
YNL009W	0.0129833		YLR330W	0.0441433		YDR536W
YBL059W	0.0130178		YLR167W	0.0443885		YDR538W
YCL029C	0.0131169		YGL154C	0.0445957		YEL012W
YNL252C	0.0131755		YDR088C	0.0445986		YEL017C-A
YBR299W	0.0132018		YIL019W	0.0452318		YEL020W-A
YER052C	0.0133418		YER173W	0.0452696		YEL038W
YIL155C	0.0133722		YFR044C	0.0456737		YEL046C
YNL153C	0.0133857		YKL195W	0.0457526		YEL057C
YHR049W	0.0133989		YER130C	0.0459004		YEL066W
YDR201W	0.01344		YMR073C	0.0462872		YEL071W
YMR152W	0.0135289		YAL005C	0.0464974		YER001W
YHR070W	0.0135459		YHR129C	0.0467963		YER015W
YHL008C	0.0135636		YNL093W	0.0469655		YER019W
YOL105C	0.0135896		YLR175W	0.047262		YER024W
YGL010W	0.0138193		YLR020C	0.0473256		YER027C
YPR037C	0.0139607		YNL304W	0.0473514		YER030W
YPL186C	0.0140436		YCR072C	0.0484852		YER034W
YMR226C	0.0140984		YNL297C	0.0489044		YER035W
YBR208C	0.0142088		YOL151W	0.048913		YER040W
YNL124W	0.0142427		YBR255C-A	0.048962		YER048W-A
YJL196C	0.0142454		YLR315W	0.0493036		YER049W
YJL065C	0.0142869		YML123C	0.0497904		YER052C
YML050W	0.0142946		YOL038W	0.0499515		YER054C
YMR206W	0.0143775		YPR094W	0.049985		YER055C
YNL221C	0.0143812					YER058W
YDR503C	0.014394					YER061C
YBR233W-A	0.014422					YER062C
YDR400W	0.0145699					YER065C
YMR240C	0.0145759					YER077C
YOL101C	0.0146313					YER093C-A
YER182W	0.0146505					YER115C
YNR061C	0.0147635					YER130C
YMR214W	0.0147735					YER132C
YBL045C	0.0149403					YER139C
YNL173C	0.0150892					YER140W
YER168C	0.0151002					YER144C
YML128C	0.0151322					YER149C
YDR181C	0.0151379					YER151C
YMR171C	0.0151899					YER158C
YDR257C	0.0152237					YER163C
YOL154W	0.0153955					YER168C
YKL141W	0.015411					YER173W
YPL113C	0.015508					YER180C
YDR513W	0.0155879					YER182W
YPL234C	0.0156804					YFL010C
YCR005C	0.015751					YFL028C
YIL044C	0.0157826					YFL030W
YOR321W	0.0158316					YFL031W
YLL009C	0.0159268					YFL033C
YDL049C	0.0159675					YFL052W
YML068W	0.0162195					YFL054C
YNR002C	0.0162878					YFL055W
YNL012W	0.0163211					YFL059W
YMR030W	0.0163983					YFR004W
YMR011W	0.0165042					YFR013W
YOR064C	0.0165545					YFR024C-A
YFR049W	0.0166009					YFR025C
YML056C	0.016693					YFR031C
YKL170W	0.0167993					YFR032C-A
YPL169C	0.0169424					YFR044C
YOR101W	0.0169624					YFR049W
YIL057C	0.0169697					YFR050C
YER001W	0.0169826					YFR055W
YPL199C	0.0171166					YGL008C
YGR234W	0.0171293					YGL009C
YIL076W	0.0172046					YGL010W
YBR242W	0.0172434					YGL017W
YHR113W	0.0172641					YGL023C
YLR121C	0.0173161					YGL026C
YML091C	0.0173689					YGL043W
YFL054C	0.0174606					YGL044C
YPL012W	0.0174948					YGL047W
YOL151W	0.0174976					YGL062W
YIL121W	0.0176157					YGL077C
YCR021C	0.0176585					YGL080W
YJL110C	0.0176645					YGL083W
YLR377C	0.0177396					YGL086W
YPL103C	0.0177433					YGL087C
YOR198C	0.0178027					YGL090W
YMR298W	0.017804					YGL091C
YMR178W	0.0178139					YGL106W
YKL208W	0.0178636					YGL107C
YPL014W	0.0179332					YGL125W
YGL080W	0.0179469					YGL142C
YPR184W	0.0181431					YGL143C
YBL030C	0.0182203					YGL146C
YDR153C	0.0182616					YGL154C
YPR075C	0.0184715					YGL155W
YCR024C-A	0.0184734					YGL162W
YDR189W	0.018701					YGL169W
YMR105C	0.0187616					YGL172W
YLL018C-A	0.0188551					YGL181W
YDR464W	0.0188691					YGL205W
YDL079C	0.0189011					YGL220W
YNL122C	0.0190574					YGL226W
YMR280C	0.0190938					YGL236C
YBR269C	0.0191675					YGL242C
YPL146C	0.0191889					YGL250W
YOR285W	0.0192481					YGL255W
YKL218C	0.0193109					YGL256W
YBR120C	0.0194237					YGL257C
YOL125W	0.0194594					YGR003W
YGR161C	0.0197771					YGR016W
YKL051W	0.0198414					YGR020C
YPL008W	0.019869					YGR021W
YHR132W-A	0.0199642					YGR040W
YKR065C	0.0200152					YGR047C
YDL142C	0.0200818					YGR055W
YPL088W	0.0201539					YGR058W
YOR337W	0.0201572					YGR067C
YAL039C	0.020205					YGR076C
YDR148C	0.0202109					YGR080W
YGR174C	0.0202574					YGR082W
YNL306W	0.0203116					YGR118W
YER048W-A	0.0203993					YGR136W
YKL028W	0.0205799					YGR138C
YJL170C	0.0205963					YGR143W
YKL152C	0.0206789					YGR152C
YDR255C	0.0208396					YGR153W
YKR049C	0.0208938					YGR154C
YOL045W	0.0209256					YGR159C
YBR050C	0.0209608					YGR161C
YKL176C	0.0210117					YGR163W
YLR307C-A	0.0210923					YGR168C
YLR164W	0.0211159					YGR174C
YPL089C	0.0211519					YGR174W-A
YJL059W	0.0212059					YGR180C
YER055C	0.0213836					YGR189C
YLR289W	0.0213967					YGR191W
YNL254C	0.02151					YGR194C
YGR241C	0.0216369					YGR202C
YHR038W	0.021909					YGR225W
YOL109W	0.0220024					YGR229C
YPL092W	0.0220528					YGR230W
YPL099C	0.0220549					YGR232W
YGL023C	0.0220677					YGR234W
YML100W	0.0221882					YGR238C
YPL134C	0.0222342					YGR239C
YGR246C	0.0222579					YGR240C
YDR079W	0.022351					YGR241C
YDR527W	0.0224374					YGR243W
YGR082W	0.0224875					YGR245C
YKL163W	0.022563					YGR246C
YMR042W	0.0225976					YGR275W
YPR156C	0.0226089					YGR276C
YDR482C	0.0227599					YGR278W
YHR008C	0.0227931					YGR289C
YGL107C	0.0229011					YHL008C
YLR250W	0.0229673					YHL009C
YBL057C	0.0230014					YHL016C
YDR100W	0.0230209					YHL024W
YMR026C	0.0230945					YHL025W
YDL130W-A	0.0232124					YHL032C
YDR466W	0.0232364					YHR003C
YGR021W	0.0233778					YHR008C
YDR357C	0.0234024					YHR011W
YLR429W	0.023411					YHR012W
YDR512C	0.023438					YHR024C
YNL021W	0.0235299					YHR027C
YGR138C	0.0235638					YHR031C
YMR121C	0.0235711					YHR032W
YDR481C	0.0239212					YHR037W
YOR051C	0.0240347					YHR038W
YNL202W	0.0240459					YHR049W
YPL083C	0.024457					YHR057C
YPR017C	0.0244778					YHR063C
YLR200W	0.0244817					YHR068W
YIL055C	0.0246091					YHR070W
YFL031W	0.0247702					YHR071W
YJR119C	0.0248023					YHR076W
YLR223C	0.0248054					YHR087W
YLR283W	0.024843					YHR088W
YPR040W	0.0249047					YHR092C
YKL068W-A	0.0250153					YHR113W
YNR010W	0.0250931					YHR116W
YNL223W	0.0252462					YHR124W
YAL014C	0.0252991					YHR126C
YNL108C	0.0253174					YHR129C
YGL062W	0.0253778					YHR132C
YLR179C	0.0254435					YHR132W-A
YNL253W	0.0256625					YHR137W
YHR132C	0.025889					YHR147C
YDR424C	0.0259283					YHR162W
YNL274C	0.0259719					YHR164C
YDR057W	0.0260072					YHR176W
YNL098C	0.0260237					YHR179W
YKR038C	0.0260569					YHR187W
YPL094C	0.0262207					YHR199C-A
YER035W	0.0262387					YHR201C
YML114C	0.0262745					YHR202W
YPR084W	0.0264122					YHR206W
YKL053C-A	0.0264555					YHR208W
YIR029W	0.0265615					YIL010W
YOR388C	0.0265801					YIL013C
YOR177C	0.0266052					YIL014C-A
YLR154W-E	0.0266583					YIL016W
YAR002C-A	0.0267024					YIL019W
YOR099W	0.0267327					YIL024C
YKL057C	0.0268052					YIL033C
YBR287W	0.0268489					YIL044C
YKR055W	0.0270431					YIL046W-A
YLR285W	0.0271538					YIL053W
YDL177C	0.0272308					YIL055C
YGR163W	0.0272688					YIL056W
YGL142C	0.0272753					YIL057C
YPL212C	0.0273198					YIL070C
YGL146C	0.0274776					YIL076W
YKL008C	0.0274787					YIL087C
YML042W	0.0274835					YIL101C
YKL091C	0.0278373					YIL105C
YJL034W	0.0278642					YIL116W
YIL087C	0.0278776					YIL117C
YHR199C-A	0.028105					YIL121W
YER093C-A	0.0281186					YIL124W
YDR259C	0.028183					YIL136W
YNR027W	0.0282339					YIL144W
YHL032C	0.0282892					YIL155C
YLR199C	0.028294					YIL158W
YNL142W	0.0283927					YIL160C
YFR055W	0.0284928					YIL161W
YGR238C	0.0285406					YIL172C
YDR345C	0.0286903					YIR001C
YPR030W	0.0286995					YIR004W
YDR110W	0.0288333					YIR011C
YDR068W	0.0288994					YIR021W
YLR375W	0.0289358					YIR029W
YOL033W	0.0289951					YIR032C
YOL066C	0.0290443					YIR033W
YGL043W	0.0291277					YIR035C
YPR003C	0.0291563					YIR039C
YNL177C	0.0291749					YJL005W
YLR392C	0.0291784					YJL024C
YBL085W	0.0291879					YJL026W
YDR206W	0.0292839					YJL034W
YHR063C	0.0293877					YJL037W
YLR393W	0.0295458					YJL042W
YOR168W	0.0295528					YJL056C
YLR244C	0.0295675					YJL058C
YJR019C	0.0296427					YJL059W
YDL031W	0.0297728					YJL062W-A
YML011C	0.0297899					YJL065C
YNL036W	0.0300107					YJL066C
YGL091C	0.0300347					YJL076W
YER065C	0.0301249					YJL082W
YDR463W	0.0301924					YJL084C
YGR194C	0.0302049					YJL098W
YDL027C	0.0303159					YJL103C
YMR175W	0.0303216					YJL109C
YGR189C	0.0305339					YJL110C
YBR056W-A	0.0305635					YJL144W
YGL083W	0.0306147					YJL170C
YDL181W	0.030683					YJL171C
YGR016W	0.0307062					YJL180C
YER040W	0.0307616					YJL181W
YGL106W	0.030788					YJL185C
YCR009C	0.0308307					YJL194W
YGR040W	0.0308388					YJL196C
YLR016C	0.0309131					YJL214W
YML123C	0.0309169					YJL216C
YPR035W	0.0309324					YJL217W
YFL055W	0.0310953					YJR019C
YPL191C	0.0311439					YJR024C
YPL221W	0.031258					YJR034W
YEL038W	0.0313113					YJR043C
YPL077C	0.0313674					YJR046W
YHL024W	0.0315073					YJR073C
YPL106C	0.0315548					YJR075W
YPL026C	0.0316223					YJR095W
YDL123W	0.031663					YJR118C
YHR208W	0.0318415					YJR119C
YJL082W	0.0318675					YJR122W
YPR065W	0.031923					YJR133W
YNL117W	0.0320716					YJR138W
YDL098C	0.0322094					YJR141W
YNL130C-A	0.03222					YJR148W
YDL085W	0.0322896					YKL008C
YER132C	0.0323704					YKL018C-A
YOR357C	0.0324072					YKL028W
YNR001C	0.032453					YKL029C
YMR137C	0.0325151					YKL051W
YML107C	0.0328507					YKL053C-A
YBR185C	0.0328738					YKL057C
YGL077C	0.0328961					YKL062W
YMR232W	0.0329106					YKL068W-A
YPL213W	0.0329368					YKL072W
YML058W	0.0329937					YKL084W
YNL086W	0.0330135					YKL091C
YOL126C	0.0331843					YKL093W
YDR054C	0.0331919					YKL096C-B
YIL105C	0.0332288					YKL099C
YHR071W	0.033251					YKL100C
YGL125W	0.0335378					YKL107W
YGL236C	0.033589					YKL110C
YGR191W	0.0336387					YKL112W
YAL059W	0.0336916					YKL120W
YHR206W	0.0337095					YKL128C
YDR121W	0.0338103					YKL141W
YNL315C	0.0339163					YKL148C
YNR015W	0.0339382					YKL149C
YNL307C	0.0340102					YKL152C
YER058W	0.0340125					YKL163W
YDL203C	0.0340169					YKL165C
YKR043C	0.0342628					YKL168C
YLL048C	0.0343998					YKL170W
YGR229C	0.0344119					YKL175W
YLL060C	0.0344955					YKL176C
YNL190W	0.034563					YKL187C
YBR264C	0.0345828					YKL195W
YKR026C	0.0345886					YKL196C
YPR138C	0.0346662					YKL208W
YEL020W-A	0.0347784					YKL217W
YDR090C	0.0350132					YKL218C
YMR043W	0.0350754					YKL219W
YAL067C	0.0352563					YKR002W
YMR080C	0.0353191					YKR005C
YOR262W	0.0353622					YKR006C
YDL107W	0.0353701					YKR009C
YGL008C	0.0353948					YKR026C
YER077C	0.0354854					YKR038C
YFL010C	0.0357499					YKR042W
YMR060C	0.0358819					YKR043C
YLL007C	0.0361555					YKR049C
YDR178W	0.0361577					YKR055W
YIL172C	0.036178					YKR058W
YBL039W-A	0.0362003					YKR065C
YOR173W	0.0362195					YKR066C
YGL155W	0.0362743					YKR067W
YPL159C	0.0362848					YKR068C
YJR148W	0.0364101					YKR071C
YLR247C	0.0365322					YKR080W
YAL021C	0.0366535					YKR088C
YDR403W	0.0366953					YLL001W
YDR214W	0.0367126					YLL007C
YEL017C-A	0.0367226					YLL009C
YDR266C	0.036836					YLL012W
YDL235C	0.0368673					YLL018C-A
YCL056C	0.0369031					YLL019C
YNL255C	0.0369758					YLL048C
YJL180C	0.0370037					YLL050C
YGR174W-A	0.0370214					YLL055W
YDL189W	0.0370493					YLL060C
YJL214W	0.0372912					YLR004C
YPR155C	0.0373669					YLR013W
YLR291C	0.0373746					YLR016C
YIL046W-A	0.0373781					YLR020C
YMR195W	0.0374443					YLR021W
YLR387C	0.0374881					YLR024C
YDR009W	0.0374902					YLR053C
YDR316W	0.037522					YLR058C
YOR111W	0.0375524					YLR064W
YPL133C	0.0375541					YLR066W
YOR299W	0.037567					YLR082C
YKR005C	0.0376549					YLR085C
YLR390W	0.0376892					YLR087C
YPL097W	0.0379194					YLR094C
YIR001C	0.0379759					YLR113W
YNR013C	0.038058					YLR121C
YER140W	0.0381692					YLR141W
YLR273C	0.0382132					YLR149C
YKL195W	0.038259					YLR152C
YOR118W	0.0384203					YLR154W-E
YJL171C	0.0384621					YLR164W
YOL128C	0.038481					YLR167W
YPL042C	0.0385045					YLR174W
YLR094C	0.0385354					YLR175W
YKR066C	0.0386653					YLR179C
YKL062W	0.0386878					YLR180W
YGR118W	0.0387892					YLR194C
YMR120C	0.0388414					YLR199C
YGR275W	0.0389008					YLR200W
YOR311C	0.0389411					YLR205C
YLR225C	0.038944					YLR208W
YPR180W	0.0390428					YLR221C
YIL124W	0.0390866					YLR222C
YDL224C	0.039162					YLR223C
YCR052W	0.0391893					YLR224W
YNL101W	0.0391948					YLR225C
YCR097W	0.0392248					YLR233C
YNL217W	0.0392391					YLR237W
YPL058C	0.0392514					YLR244C
YLR382C	0.0393044					YLR247C
YAL038W	0.0393055					YLR250W
YHR037W	0.0394054					YLR258W
YGR020C	0.0394207					YLR260W
YIL158W	0.0394506					YLR270W
YOR085W	0.0394532					YLR273C
YLR300W	0.0396535					YLR275W
YIR032C	0.039816					YLR283W
YIL136W	0.0401262					YLR284C
YER019W	0.0401663					YLR285W
YAL055W	0.04018					YLR289W
YOR047C	0.0402187					YLR291C
YKR006C	0.0402213					YLR292C
YIR039C	0.040299					YLR295C
YBR290W	0.0403199					YLR300W
YER062C	0.0403719					YLR301W
YLR149C	0.0403831					YLR304C
YDL006W	0.0404816					YLR307C-A
YML081C-A	0.0405437					YLR307W
YGL047W	0.0406053					YLR315W
YDR123C	0.0406902					YLR330W
YGL017W	0.0406992					YLR333C
YHR202W	0.0407273					YLR335W
YDR143C	0.0407462					YLR375W
YOR209C	0.0409365					YLR377C
YGR289C	0.0409464					YLR382C
YOL130W	0.0411528					YLR387C
YFL028C	0.0412021					YLR390W
YML112W	0.041319					YLR392C
YHR031C	0.0414599					YLR393W
YDL200C	0.0414896					YLR429W
YOR306C	0.0415144					YLR437C
YGR154C	0.041616					YLR438C-A
YKL112W	0.0417047					YML007W
YNL213C	0.0417755					YML009C
YOR164C	0.0417818					YML011C
YDR492W	0.0419105					YML015C
YPL043W	0.0419576					YML042W
YPR165W	0.0421191					YML050W
YCL031C	0.0421468					YML054C
YDR352W	0.0421722					YML056C
YER151C	0.0421789					YML058W
YPR114W	0.0424288					YML059C
YLL001W	0.0425303					YML068W
YLR013W	0.0425445					YML071C
YHR116W	0.0425795					YML072C
YPL061W	0.0426533					YML079W
YBR148W	0.0426605					YML081C-A
YJL109C	0.0426625					YML087C
YDR248C	0.042728					YML091C
YCR043C	0.0427743					YML092C
YLR058C	0.0428128					YML100W
YKL120W	0.042885					YML107C
YHR011W	0.0429293					YML112W
YJR122W	0.0429436					YML114C
YDL088C	0.042945					YML123C
YLR260W	0.0430142					YML128C
YJR118C	0.0430495					YML131W
YPR133C	0.0430891					YMR006C
YNL185C	0.0431094					YMR009W
YBR105C	0.0431233					YMR011W
YPL126W	0.0431521					YMR024W
YOL089C	0.0431615					YMR026C
YLR064W	0.0432197					YMR028W
YJR073C	0.0432758					YMR030W
YPL067C	0.0432847					YMR033W
YNL087W	0.043409					YMR042W
YOR087W	0.0435118					YMR043W
YGR152C	0.0435601					YMR060C
YDR342C	0.0435675					YMR070W
YGR240C	0.0435836					YMR073C
YKL099C	0.0436104					YMR080C
YOL023W	0.0436327					YMR091C
YNL106C	0.0436739					YMR095C
YBL080C	0.0436917					YMR105C
YBR137W	0.043764					YMR120C
YML007W	0.0438385					YMR121C
YCR059C	0.0438479					YMR126C
YPL183W-A	0.0438645					YMR129W
YCR010C	0.0439406					YMR137C
YDR326C	0.043953					YMR149W
YLL019C	0.0439719					YMR152W
YMR322C	0.0439821					YMR166C
YBL039C	0.0440095					YMR171C
YIL160C	0.044022					YMR175W
YOR176W	0.0443008					YMR178W
YKR002W	0.044494					YMR195W
YLR208W	0.0446639					YMR204C
YDL108W	0.0448206					YMR206W
YMR129W	0.044884					YMR214W
YDR518W	0.0449061					YMR226C
YDR533C	0.0449582					YMR231W
YDL219W	0.0449682					YMR232W
YLR113W	0.0450366					YMR234W
YJL194W	0.0450472					YMR240C
YIL056W	0.0450655					YMR243C
YKL018C-A	0.0450677					YMR246W
YKR042W	0.0451588					YMR266W
YLR221C	0.045202					YMR269W
YBL002W	0.0452235					YMR280C
YIR004W	0.0453129					YMR289W
YLR024C	0.045322					YMR298W
YAL041W	0.0453326					YMR303C
YGL162W	0.0453335					YMR315W
YLR053C	0.0453585					YMR322C
YKR080W	0.0454722					YNL009W
YKL149C	0.0455413					YNL012W
YNL141W	0.045601					YNL021W
YBR054W	0.0456134					YNL026W
YDL111C	0.0456882					YNL032W
YDR132C	0.045701					YNL035C
YKR067W	0.0457878					YNL036W
YBR155W	0.0457957					YNL037C
YDR511W	0.0458297					YNL086W
YKL107W	0.045915					YNL087W
YNR030W	0.0459752					YNL093W
YDR538W	0.0460124					YNL094W
YPR086W	0.0460531					YNL098C
YGL172W	0.0461098					YNL101W
YML079W	0.046357					YNL106C
YBR069C	0.0464368					YNL108C
YPL123C	0.0465081					YNL117W
YPL202C	0.0465455					YNL122C
YAR014C	0.0465894					YNL124W
YER115C	0.0466891					YNL130C-A
YLR437C	0.0467405					YNL141W
YBL008W-A	0.0467994					YNL142W
YMR028W	0.0468328					YNL153C
YKL165C	0.046854					YNL173C
YGL169W	0.0468842					YNL177C
YGL250W	0.0468883					YNL182C
YJL037W	0.0468949					YNL185C
YCR016W	0.0469227					YNL190W
YPR021C	0.0469432					YNL202W
YDR037W	0.0472116					YNL213C
YOL152W	0.0472317					YNL217W
YCR083W	0.0472332					YNL221C
YFL059W	0.0473173					YNL223W
YEL071W	0.0473597					YNL250W
YMR289W	0.0473606					YNL251C
YHR124W	0.0474766					YNL252C
YKL128C	0.0477136					YNL253W
YIL144W	0.0478256					YNL254C
YPR164W	0.0478529					YNL255C
YNR039C	0.047864					YNL260C
YLR180W	0.0479532					YNL262W
YHR068W	0.0479551					YNL270C
YLR438C-A	0.0480097					YNL274C
YDR085C	0.0483116					YNL280C
YLR258W	0.0483237					YNL297C
YIL014C-A	0.048373					YNL304W
YAL047C	0.0483933					YNL306W
YDL197C	0.0487122					YNL307C
YJL144W	0.0487724					YNL311C
YLL050C	0.048788					YNL315C
YOL107W	0.0490287					YNR001C
YIR021W	0.0490608					YNR002C
YJR133W	0.0491133					YNR010W
YNL280C	0.0491306					YNR013C
YER061C	0.0491462					YNR015W
YIL016W	0.0492033					YNR016C
YGR243W	0.0492725					YNR026C
YBR275C	0.0493506					YNR027W
YJL185C	0.0493662					YNR030W
YAR035W	0.0493684					YNR039C
YKR068C	0.0493691					YNR061C
YDR111C	0.0494869					YOL011W
YGL090W	0.0494872					YOL019W
YOR291W	0.0496011					YOL023W
YLR141W	0.0496326					YOL033W
YHL025W	0.0496621					YOL038W
YGR159C	0.0497268					YOL045W
YGR225W	0.0497875					YOL052C-A
YPR100W	0.0498967					YOL066C
YKR088C	0.0499227					YOL070C
						YOL073C
						YOL084W
						YOL086W-A
						YOL087C
						YOL089C
						YOL100W
						YOL101C
						YOL105C
						YOL107W
						YOL109W
						YOL122C
						YOL125W
						YOL126C
						YOL128C
						YOL130W
						YOL133W
						YOL136C
						YOL143C
						YOL151W
						YOL152W
						YOL154W
						YOR025W
						YOR031W
						YOR047C
						YOR051C
						YOR064C
						YOR065W
						YOR067C
						YOR077W
						YOR079C
						YOR085W
						YOR087W
						YOR093C
						YOR099W
						YOR101W
						YOR109W
						YOR111W
						YOR113W
						YOR118W
						YOR120W
						YOR129C
						YOR137C
						YOR164C
						YOR168W
						YOR173W
						YOR176W
						YOR177C
						YOR180C
						YOR198C
						YOR209C
						YOR215C
						YOR222W
						YOR230W
						YOR252W
						YOR262W
						YOR267C
						YOR276W
						YOR279C
						YOR281C
						YOR283W
						YOR285W
						YOR286W
						YOR291W
						YOR299W
						YOR306C
						YOR311C
						YOR321W
						YOR330C
						YOR337W
						YOR338W
						YOR357C
						YOR374W
						YOR388C
						YPL008W
						YPL012W
						YPL014W
						YPL015C
						YPL018W
						YPL026C
						YPL030W
						YPL042C
						YPL043W
						YPL058C
						YPL060W
						YPL061W
						YPL067C
						YPL074W
						YPL077C
						YPL082C
						YPL083C
						YPL088W
						YPL089C
						YPL092W
						YPL094C
						YPL097W
						YPL099C
						YPL103C
						YPL104W
						YPL106C
						YPL113C
						YPL123C
						YPL126W
						YPL133C
						YPL134C
						YPL146C
						YPL147W
						YPL159C
						YPL166W
						YPL169C
						YPL177C
						YPL178W
						YPL183W-A
						YPL186C
						YPL191C
						YPL196W
						YPL199C
						YPL200W
						YPL201C
						YPL202C
						YPL206C
						YPL212C
						YPL213W
						YPL221W
						YPL223C
						YPL234C
						YPL250C
						YPL252C
						YPL269W
						YPR001W
						YPR002W
						YPR003C
						YPR005C
						YPR006C
						YPR017C
						YPR021C
						YPR025C
						YPR030W
						YPR031W
						YPR035W
						YPR037C
						YPR040W
						YPR062W
						YPR065W
						YPR075C
						YPR082C
						YPR084W
						YPR086W
						YPR094W
						YPR100W
						YPR114W
						YPR133C
						YPR138C
						YPR152C
						YPR155C
						YPR156C
						YPR164W
						YPR165W
						YPR171W
						YPR180W
						YPR182W
						YPR184W

## Sheet: WT normalized expression levels
ORF	C-lim-qdr3-ho		ORF	C-lim-pdr3-ho		ORF	N-lim-qdr3-ho		ORF	N-lim-pdr3-ho
YFL031W	1.52794		YIL019W	1.53263		YOR338W	1.52492		YIL057C	2.61974
YLR437C	1.45712		YDR508C	1.29271		YML056C	1.2982		YOR338W	2.39622
YNL190W	1.36922		YGR245C	1.11399		YBR069C	1.29484		YCR010C	2.1591
YLR179C	1.26912		YBR233W-A	1.09464		YNL036W	1.24226		YNL141W	1.74004
YFR024C-A	1.19263		YHR088W	1.06116		YGR159C	1.23928		YHR126C	1.69216
YHL032C	1.17325		YPL146C	1.04316		YDR508C	1.23222		YMR175W	1.68602
YEL046C	1.15394		YOL125W	1.03695		YPL252C	1.13391		YDR508C	1.61615
YBL039C	1.15239		YPL043W	1.03621		YBR105C	1.12591		YNL182C	1.54392
YLR180W	1.13195		YMR269W	0.946693		YER062C	1.06556		YCR072C	1.5031
YDR508C	1.10553		YNL262W	0.941108		YNL124W	1.00862		YGR159C	1.42852
YNL117W	1.09943		YLL012W	0.939978		YDL048C	0.988277		YML056C	1.42725
YKL029C	1.04892		YCR052W	0.925618		YCR072C	0.986779		YHR088W	1.38419
YML059C	1.0332		YKR043C	0.903678		YGR138C	0.983871		YBL039C	1.30011
YNL202W	1.02788		YPL082C	0.885574		YBR054W	0.899296		YAL059W	1.28282
YPL082C	1.00273		YOR065W	0.873053		YKR066C	0.889976		YKL099C	1.27604
YOL143C	0.988631		YCR072C	0.86265		YNL141W	0.870841		YIL019W	1.27245
YJL005W	0.98658		YBL039C	0.85158		YIL053W	0.841684		YNL036W	1.22223
YJL216C	0.982483		YHR068W	0.847383		YDR400W	0.838181		YDR488C	1.21535
YPR138C	0.978354		YFL055W	0.833691		YHR070W	0.835709		YOL136C	1.2073
YAL021C	0.971687		YLR141W	0.81061		YER130C	0.826474		YNR002C	1.17948
YML056C	0.958455		YIL024C	0.790618		YNR027W	0.826315		YDL213C	1.14929
YCR012W	0.94696		YLR375W	0.786481		YKL029C	0.812959		YOR252W	1.1121
YGR229C	0.919995		YHR070W	0.758045		YHR032W	0.812851		YMR269W	1.106
YJL034W	0.905341		YML056C	0.742018		YOL136C	0.78782		YBR155W	1.09941
YPL134C	0.905177		YNL153C	0.740614		YJL214W	0.785626		YCR021C	1.09733
YMR246W	0.898894		YLR175W	0.735633		YDR345C	0.759678		YCR016W	1.09664
YML131W	0.887997		YAL059W	0.735072		YBR261C	0.756556		YGR245C	1.09293
YGL026C	0.881805		YDR488C	0.729698		YOL052C-A	0.737103		YLR222C	1.07456
YKL148C	0.863983		YPL169C	0.709912		YLR141W	0.732805		YPL126W	1.07394
YOR137C	0.862995		YCR043C	0.689874		YLR223C	0.732706		YPL146C	1.02149
YOL087C	0.85941		YLR335W	0.68713		YEL046C	0.703832		YNL262W	0.99834
YMR214W	0.859159		YKL149C	0.668622		YAL021C	0.692797		YLL012W	0.995365
YGR055W	0.855852		YNL130C-A	0.664561		YJR024C	0.691971		YGR229C	0.991743
YPL061W	0.852828		YGR229C	0.658072		YOR065W	0.679616		YIL160C	0.984604
YHR024C	0.848007		YPL061W	0.652313		YOR337W	0.671253		YHR070W	0.978299
YCR052W	0.841065		YNL009W	0.63958		YPR182W	0.664706		YAR035W	0.978253
YIL116W	0.830044		YLR222C	0.632299		YBL045C	0.658992		YOR306C	0.974665
YJR148W	0.823892		YGL077C	0.630812		YBL039C	0.652552		YGL062W	0.971639
YGR159C	0.819175		YOR330C	0.628789		YKL110C	0.647939		YOL125W	0.950806
YOL125W	0.806316		YFR013W	0.626206		YPL026C	0.634233		YOR101W	0.933521
YML058W	0.802066		YNL117W	0.619605		YOR047C	0.630148		YLR307C-A	0.92394
YDL235C	0.794647		YBR183W	0.613956		YKL051W	0.629811		YPL012W	0.913731
YBR068C	0.786887		YBR155W	0.609344		YGR245C	0.625582		YLR121C	0.909124
YNL037C	0.774179		YOR252W	0.608177		YNL182C	0.62391		YBR233W-A	0.90307
YLR375W	0.772822		YMR246W	0.599898		YGL220W	0.618319		YLR175W	0.891994
YLR429W	0.772619		YLR221C	0.599267		YGR055W	0.613242		YPL043W	0.863825
YIL033C	0.764422		YMR129W	0.598741		YMR070W	0.607156		YBR299W	0.859012
YKL112W	0.76349		YKL099C	0.595015		YDR178W	0.601184		YNL124W	0.851582
YMR129W	0.763338		YNL182C	0.593738		YDR384C	0.596737		YCL031C	0.84705
YNR013C	0.755337		YMR006C	0.592541		YGL062W	0.594591		YLR223C	0.843703
YGR080W	0.734372		YMR214W	0.592479		YER049W	0.591356		YBR050C	0.838167
YPR062W	0.725623		YDL079C	0.588932		YLR175W	0.588305		YDL111C	0.821825
YAR035W	0.721888		YNL185C	0.587208		YNL130C-A	0.585457		YGR152C	0.816202
YPL221W	0.712906		YPL113C	0.576026		YMR214W	0.584826		YLR221C	0.802196
YOL126C	0.701563		YDL031W	0.568217		YBR155W	0.579395		YJR043C	0.800844
YER015W	0.694218		YKL029C	0.567138		YKL141W	0.577212		YKR026C	0.788342
YKR042W	0.693094		YDL214C	0.558215		YNR030W	0.576784		YBR069C	0.78449
YMR043W	0.688273		YBR275C	0.555434		YLR094C	0.576256		YDL031W	0.783148
YGL205W	0.677631		YML114C	0.55116		YKL099C	0.576113		YGL077C	0.781034
YDL237W	0.675298		YER077C	0.5465		YML059C	0.557882		YOR051C	0.775751
YIL019W	0.674987		YOR180C	0.545507		YDR409W	0.557441		YBR105C	0.772715
YBR056W-A	0.672579		YPL012W	0.537055		YPR062W	0.556732		YML042W	0.76826
YPR156C	0.670104		YPR006C	0.533493		YPR138C	0.556465		YOR065W	0.764159
YHR132C	0.665152		YJR046W	0.531785		YKL148C	0.555577		YDR345C	0.761432
YLR221C	0.655969		YPL106C	0.52848		YDR111C	0.553868		YHR032W	0.75642
YDR457W	0.646523		YDR347W	0.517477		YDL111C	0.553257		YKL110C	0.725188
YDL048C	0.644392		YPL126W	0.506308		YJL098W	0.549118		YCR043C	0.723021
YEL038W	0.64406		YOR337W	0.503154		YOL151W	0.544877		YNL153C	0.708383
YHL024W	0.641486		YJR043C	0.500618		YOR252W	0.538245		YOR047C	0.697022
YJR019C	0.63902		YJL098W	0.498429		YLL012W	0.535557		YHR003C	0.696331
YFR044C	0.636201		YJL214W	0.497063		YDR488C	0.529723		YER149C	0.6945
YJL171C	0.635048		YBR056W-A	0.496749		YPL159C	0.529326		YFR055W	0.687528
YLR058C	0.633195		YJL216C	0.493701		YCL031C	0.521955		YJR141W	0.685454
YHR032W	0.63219		YLR053C	0.489398		YDR528W	0.520627		YBR242W	0.682342
YDR121W	0.629169		YDR383C	0.484352		YKL165C	0.520396		YDR527W	0.675911
YPR021C	0.628422		YJL024C	0.478876		YLL018C-A	0.518808		YGL169W	0.670134
YNL255C	0.627454		YJR148W	0.470439		YML112W	0.511408		YDR110W	0.668565
YLR237W	0.626288		YBL015W	0.467459		YPR156C	0.503694		YIL161W	0.658075
YOR262W	0.624788		YMR126C	0.466497		YKL112W	0.503515		YBR042C	0.646542
YLL012W	0.624191		YDL213C	0.463097		YDL213C	0.501577		YDR179W-A	0.636651
YMR171C	0.620926		YHR129C	0.457046		YGR082W	0.501473		YPL212C	0.63144
YBR261C	0.616299		YLR237W	0.456494		YGR234W	0.495308		YDR256C	0.628722
YPL126W	0.613396		YHR003C	0.455665		YDL144C	0.484683		YNR027W	0.623393
YOR230W	0.608021		YDR464W	0.448859		YGR229C	0.482554		YNL117W	0.621873
YLL048C	0.606751		YDR111C	0.446667		YOL066C	0.479737		YOR176W	0.619225
YML092C	0.606331		YKR026C	0.430732		YJL216C	0.478801		YCR059C	0.611482
YHL025W	0.596262		YBR042C	0.430336		YLR222C	0.477552		YBR275C	0.607877
YGR180C	0.594213		YPL133C	0.426786		YHR003C	0.469571		YGR153W	0.605131
YPR006C	0.592743		YJL026W	0.423318		YOR267C	0.468495		YIR011C	0.603435
YER062C	0.591198		YGR289C	0.423235		YPL012W	0.46813		YDR317W	0.598963
YDR129C	0.589256		YGR276C	0.422837		YDL031W	0.466494		YLR020C	0.590161
YDR347W	0.58816		YHR032W	0.419295		YLR237W	0.466116		YJL098W	0.589327
YPL234C	0.587175		YDL006W	0.418203		YPL146C	0.460929		YLR233C	0.582636
YOR311C	0.587172		YLR223C	0.417595		YNR013C	0.458678		YLR244C	0.567583
YKL051W	0.585616		YER132C	0.411464		YNR016C	0.454999		YLR141W	0.567123
YOR099W	0.582761		YDR503C	0.409587		YLR437C	0.451276		YAL067C	0.567111
YIL024C	0.580344		YLR438C-A	0.409527		YHR137W	0.444936		YGR040W	0.5652
YGL008C	0.580261		YMR171C	0.409386		YPL126W	0.444774		YPR035W	0.56059
YAL038W	0.57698		YKL112W	0.40881		YOL125W	0.442888		YBL008W-A	0.537973
YPL103C	0.573761		YDR317W	0.405848		YLR438C-A	0.441899		YIL117C	0.531799
YAL005C	0.568665		YLR121C	0.40248		YBL008W-A	0.439864		YER049W	0.530757
YLR094C	0.563873		YDL108W	0.402036		YFL059W	0.439106		YPL133C	0.528901
YLR301W	0.561255		YGR152C	0.398729		YEL038W	0.438816		YOR077W	0.524015
YPL012W	0.55823		YDR009W	0.398432		YLR301W	0.43842		YDR380W	0.523344
YOR330C	0.557659		YPL008W	0.395724		YPL094C	0.429563		YKL148C	0.51885
YKL176C	0.554445		YDR457W	0.39439		YPL103C	0.426181		YLR438C-A	0.518316
YDR400W	0.54984		YNL124W	0.394085		YML081C-A	0.420908		YDR206W	0.515778
YER055C	0.547574		YKL008C	0.390018		YJL026W	0.419711		YGL155W	0.51074
YPL104W	0.543736		YML091C	0.389978		YMR266W	0.418405		YNL087W	0.510271
YJR024C	0.542318		YAR002C-A	0.386373		YCR043C	0.414592		YLR291C	0.508018
YDR481C	0.540717		YKL110C	0.384359		YOL011W	0.411291		YNL035C	0.505458
YNL087W	0.540378		YPR030W	0.384318		YLR295C	0.404465		YPL067C	0.504767
YPL252C	0.538514		YDR110W	0.383554		YDR110W	0.399735		YJL109C	0.504563
YDR178W	0.537001		YDL088C	0.381931		YOL143C	0.396328		YDR400W	0.503793
YDR464W	0.535674		YKR042W	0.376517		YAL059W	0.394016		YFL055W	0.502041
YNL036W	0.534654		YDR482C	0.371996		YLR333C	0.391904		YHR049W	0.499229
YFL055W	0.53456		YLR194C	0.369753		YGR180C	0.389998		YOL045W	0.497267
YDR037W	0.534215		YLR275W	0.368472		YOR051C	0.388576		YLR333C	0.490998
YPR114W	0.533912		YCR016W	0.368431		YLR275W	0.388489		YOL019W	0.484445
YGR240C	0.532439		YOL011W	0.368284		YAL054C	0.387657		YJL024C	0.479595
YFL033C	0.526782		YKR080W	0.365344		YPL030W	0.383465		YBL045C	0.474283
YDL181W	0.521661		YDR345C	0.364128		YNR026C	0.383016		YDR111C	0.471122
YNL185C	0.520629		YNR027W	0.359988		YKR043C	0.380306		YHR031C	0.468168
YMR080C	0.519453		YAL005C	0.354759		YER132C	0.375548		YPL252C	0.464714
YLR247C	0.516605		YOL128C	0.353602		YMR243C	0.375076		YKL141W	0.4588
YDR148C	0.515262		YIL144W	0.352392		YPR065W	0.374067		YOR168W	0.451131
YDR035W	0.513215		YDR019C	0.350126		YOR101W	0.365522		YLL018C-A	0.449664
YIR004W	0.511356		YEL046C	0.347412		YJL194W	0.363737		YML114C	0.446723
YJL056C	0.509787		YBR242W	0.344746		YCR052W	0.359665		YHR206W	0.446495
YNL124W	0.503752		YBL085W	0.344086		YJR095W	0.354021		YKR080W	0.437981
YPL074W	0.503685		YDR068W	0.333812		YDR518W	0.353831		YDL154W	0.42895
YLR291C	0.501321		YOR168W	0.332604		YFL030W	0.352548		YNR026C	0.428195
YMR011W	0.501298		YGL062W	0.332292		YOL101C	0.352085		YBR261C	0.427703
YNL108C	0.500606		YER140W	0.32729		YLR375W	0.346696		YDR536W	0.426214
YOL038W	0.497039		YDR181C	0.327158		YNR039C	0.345712		YLR094C	0.425549
YOL073C	0.496341		YHR024C	0.325656		YIR035C	0.343647		YKL149C	0.425127
YHR176W	0.495587		YNL032W	0.325258		YJR019C	0.343106		YGR067C	0.424796
YKR043C	0.494604		YCL011C	0.324976		YOR176W	0.342685		YPL169C	0.424654
YOR101W	0.492805		YOL023W	0.321408		YPL043W	0.34098		YDL006W	0.423335
YAL039C	0.490936		YDL233W	0.320474		YEL066W	0.339767		YPL030W	0.419736
YPL058C	0.483287		YLR307W	0.318476		YGL077C	0.337781		YJL214W	0.416118
YGL257C	0.482597		YIL116W	0.317458		YDR259C	0.336515		YPL201C	0.412951
YJL196C	0.482302		YPR031W	0.31668		YLR199C	0.331834		YDR181C	0.411435
YER049W	0.482089		YGR191W	0.316494		YKR065C	0.331427		YNR015W	0.41079
YHR070W	0.481334		YBL002W	0.315954		YOL084W	0.330517		YCR052W	0.410296
YPL094C	0.479871		YIR035C	0.310715		YPR114W	0.330474		YOR283W	0.409102
YIR021W	0.479417		YCL005W	0.310571		YLR292C	0.321072		YGR189C	0.408954
YNL217W	0.475564		YPL178W	0.309692		YMR149W	0.314014		YGR278W	0.399037
YNL251C	0.474265		YJR075W	0.30895		YLR087C	0.312996		YKL217W	0.398296
YDL224C	0.473931		YPL030W	0.307066		YGL242C	0.312637		YIR021W	0.389977
YLR141W	0.472794		YGL026C	0.306974		YOR388C	0.31124		YGR058W	0.389939
YCL011C	0.472277		YFR031C	0.303397		YLR244C	0.310383		YOR276W	0.389746
YOR209C	0.470445		YGL090W	0.30221		YHL032C	0.310012		YLR237W	0.387291
YFL028C	0.470276		YER061C	0.299147		YGL256W	0.308074		YGL043W	0.380632
YPL077C	0.466657		YDR206W	0.298638		YDL085W	0.305736		YOR129C	0.38052
YGR276C	0.466319		YNL213C	0.296027		YML087C	0.305655		YHR068W	0.380161
YJL065C	0.465565		YBL045C	0.294449		YMR269W	0.304616		YDR352W	0.374073
YNR030W	0.46479		YHR201C	0.292215		YDR352W	0.30367		YKR066C	0.373843
YHR063C	0.464486		YPR164W	0.289359		YIR021W	0.302506		YPR031W	0.371586
YLR199C	0.462211		YAR035W	0.288664		YKR026C	0.300497		YMR126C	0.370325
YJL098W	0.4621		YOR283W	0.287953		YBL057C	0.296622		YOR279C	0.370034
YAR002C-A	0.460699		YBR290W	0.283488		YGR020C	0.296459		YJL026W	0.367516
YLR113W	0.460379		YJL076W	0.283453		YCR016W	0.296403		YFR031C	0.361175
YNR002C	0.459185		YNL315C	0.283314		YNL108C	0.295321		YGL044C	0.361159
YPR040W	0.458272		YER015W	0.281959		YHR147C	0.294119		YPL223C	0.360523
YNL307C	0.457756		YIR004W	0.281754		YBR230C	0.293198		YOL011W	0.358991
YNL297C	0.455329		YGL044C	0.276475		YKL128C	0.292722		YKR043C	0.352811
YPL026C	0.454386		YJL110C	0.276244		YLR291C	0.291167		YDR257C	0.350758
YGL023C	0.449875		YJL065C	0.275363		YNL106C	0.286875		YKL187C	0.34048
YIR035C	0.449762		YER049W	0.27364		YNR015W	0.285591		YDL048C	0.33951
YML072C	0.448272		YHR076W	0.273567		YML091C	0.285305		YFR032C-A	0.338533
YLR335W	0.445354		YDR118W	0.273058		YPR006C	0.283677		YHR129C	0.338513
YGL077C	0.445343		YDR257C	0.2717		YIL019W	0.283377		YBL085W	0.335268
YBR155W	0.444279		YGR153W	0.271175		YNL185C	0.283197		YIL053W	0.334834
YPL169C	0.43993		YAL038W	0.269346		YLR304C	0.282522		YMR240C	0.334148
YDL007W	0.439158		YMR289W	0.268186		YDR527W	0.282164		YNR016C	0.333996
YHR113W	0.436211		YMR033W	0.265905		YLR020C	0.281173		YDR538W	0.333779
YOR180C	0.435422		YIL172C	0.26418		YGL017W	0.275839		YDL177C	0.331919
YMR006C	0.434312		YPR171W	0.263523		YHR201C	0.270261		YPR065W	0.33126
YMR289W	0.432198		YCR012W	0.26263		YER115C	0.270072		YPL269W	0.33125
YHR179W	0.427051		YGR080W	0.261529		YMR129W	0.267811		YPL202C	0.330711
YHR208W	0.426415		YJL144W	0.260798		YHR088W	0.265641		YKL051W	0.329579
YCL031C	0.426246		YLR291C	0.258147		YDR143C	0.265139		YAR014C	0.32743
YPR155C	0.425899		YNR016C	0.257718		YPR094W	0.264782		YMR070W	0.326814
YGL125W	0.424155		YDR121W	0.256916		YDR206W	0.263597		YNL252C	0.326812
YAL017W	0.420771		YNL087W	0.256639		YAR035W	0.263241		YIL158W	0.324736
YMR280C	0.42038		YNR026C	0.255234		YDR266C	0.260768		YPL008W	0.324476
YDR206W	0.420185		YER149C	0.25204		YJL034W	0.25977		YHR092C	0.323496
YJL062W-A	0.418111		YGL086W	0.248644		YJL076W	0.25965		YDR118W	0.323478
YGL106W	0.411396		YOR064C	0.247917		YDR059C	0.259539		YKL029C	0.321023
YDL031W	0.411041		YNR030W	0.247338		YML058W	0.259477		YDR240C	0.320777
YDR519W	0.410121		YPL058C	0.247134		YOR281C	0.259345		YHL009C	0.317848
YGR245C	0.408057		YPL212C	0.24547		YER158C	0.25655		YPR138C	0.316098
YJL076W	0.407219		YKL196C	0.245437		YOR180C	0.249142		YER180C	0.314158
YOR065W	0.402034		YGR082W	0.243905		YGL125W	0.24871		YML112W	0.311677
YKL110C	0.401162		YOR262W	0.241057		YML015C	0.24831		YIL070C	0.310812
YPR002W	0.400528		YPL097W	0.237248		YJR075W	0.247453		YPR006C	0.308684
YHR027C	0.39968		YOR118W	0.236104		YLR247C	0.246593		YOR067C	0.308253
YIL014C-A	0.399602		YOL070C	0.235515		YNL274C	0.246549		YDL098C	0.307707
YKR066C	0.399339		YPL221W	0.234773		YBL064C	0.243869		YMR303C	0.30722
YFL030W	0.399154		YPL223C	0.23115		YGL236C	0.243747		YER065C	0.304534
YKL057C	0.397116		YIL033C	0.230139		YPR037C	0.242148		YLR200W	0.301513
YPR182W	0.396155		YFL054C	0.230102		YPL212C	0.241796		YBL059W	0.30122
YKR026C	0.395865		YFR049W	0.227273		YNL254C	0.241504		YCL005W	0.300929
YMR269W	0.390458		YNL306W	0.222448		YHR132C	0.239384		YGR138C	0.300073
YHR068W	0.390369		YKR055W	0.221398		YOR230W	0.237829		YOR031W	0.299317
YAL067C	0.389872		YBR148W	0.221173		YGL023C	0.235699		YNL221C	0.297507
YHR147C	0.387545		YOR031W	0.218792		YJR043C	0.232094		YDR068W	0.295162
YDL088C	0.385043		YLR058C	0.218568		YHR206W	0.229933		YLR275W	0.291117
YLR175W	0.38314		YNL108C	0.21812		YNL255C	0.224717		YER062C	0.290116
YNL221C	0.38188		YPL042C	0.217781		YDR519W	0.220897		YMR129W	0.289365
YBR105C	0.380689		YJR024C	0.216289		YOR286W	0.220415		YJR095W	0.287249
YKR009C	0.376605		YDR400W	0.216244		YCR059C	0.217229		YML011C	0.286454
YAR009C	0.375591		YPL074W	0.215469		YAR002C-A	0.216676		YER077C	0.285923
YPL106C	0.375017		YBR050C	0.214504		YDR033W	0.216436		YDR054C	0.284553
YFL010C	0.373602		YDR143C	0.214143		YGL169W	0.215197		YMR028W	0.279372
YGR143W	0.369449		YGR159C	0.213668		YLR221C	0.214997		YJL076W	0.279151
YJL026W	0.369067		YNL311C	0.212296		YPL089C	0.214883		YLR335W	0.278755
YLR194C	0.367453		YHR179W	0.206876		YOR291W	0.213793		YMR091C	0.278089
YOL066C	0.366147		YIL070C	0.205391		YHL009C	0.213336		YMR073C	0.276872
YIL016W	0.364851		YLR330W	0.20144		YBL085W	0.2116		YDR123C	0.271868
YMR266W	0.360808		YGL017W	0.200382		YJL065C	0.210649		YCL029C	0.271595
YPL043W	0.3595		YFL059W	0.200086		YOR093C	0.20835		YOR337W	0.268853
YOL023W	0.359417		YKL148C	0.199703		YKL187C	0.208151		YKR068C	0.268507
YJL110C	0.35818		YGL205W	0.19947		YPR164W	0.206922		YER001W	0.268284
YBL064C	0.358003		YDL107W	0.197635		YGR058W	0.206204		YML015C	0.264723
YGR202C	0.353384		YKR002W	0.197143		YDR492W	0.203761		YGR168C	0.263328
YPL089C	0.351882		YLR224W	0.195815		YAL014C	0.203266		YPL026C	0.261911
YPR086W	0.351567		YGL143C	0.192639		YPL077C	0.20236		YLR021W	0.260773
YOL011W	0.351049		YOR051C	0.191543		YOL105C	0.200752		YDR266C	0.259834
YLR244C	0.350697		YGR174W-A	0.188198		YGR191W	0.198977		YML091C	0.259741
YLR330W	0.340269		YIL155C	0.187977		YMR175W	0.197643		YGL220W	0.25794
YPR152C	0.339873		YHR113W	0.187605		YDL203C	0.197559		YAL054C	0.256996
YJL084C	0.33969		YHR147C	0.187355		YBL030C	0.197404		YGL086W	0.254477
YIL010W	0.335979		YML131W	0.187088		YCL005W	0.197183		YMR080C	0.251155
YLR304C	0.335124		YDR085C	0.186583		YLR024C	0.196994		YIR032C	0.249719
YBL045C	0.333131		YOR101W	0.185793		YDR056C	0.195769		YGR003W	0.24739
YBL085W	0.332564		YKL057C	0.184587		YLR066W	0.194732		YGL236C	0.245835
YHR003C	0.332343		YNL037C	0.183468		YJL110C	0.193517		YHR187W	0.241531
YPL042C	0.332314		YDR266C	0.182536		YIR001C	0.191828		YIL144W	0.239475
YCR004C	0.331727		YJL170C	0.181339		YAL039C	0.191321		YDR178W	0.236967
YGR082W	0.329054		YOL073C	0.180958		YIL070C	0.189065		YKR055W	0.236128
YNL153C	0.327909		YGR040W	0.180799		YML128C	0.186694		YDR482C	0.232354
YOR164C	0.327583		YML068W	0.17887		YPL169C	0.184974		YDR409W	0.232176
YMR315W	0.324817		YML072C	0.178076		YGR047C	0.184588		YLR064W	0.231359
YDL203C	0.32438		YOL045W	0.175934		YGR240C	0.183267		YPL178W	0.227785
YLR300W	0.321647		YNR002C	0.175278		YLR224W	0.182963		YAR002C-A	0.224741
YOL130W	0.321484		YPR040W	0.175111		YOR099W	0.179968		YDR121W	0.222658
YIL053W	0.320137		YML059C	0.173264		YOL130W	0.179855		YAL047C	0.222058
YHR076W	0.319382		YPR005C	0.172327		YBL059W	0.178565		YDL108W	0.221383
YKR080W	0.317872		YGL023C	0.171631		YPR035W	0.178407		YLR016C	0.221163
YHR088W	0.313077		YNL190W	0.171308		YPL058C	0.176596		YNL108C	0.221029
YER132C	0.312959		YIR029W	0.171067		YNL221C	0.172357		YLR285W	0.219944
YDR158W	0.310791		YLR199C	0.169894		YER163C	0.171912		YOL084W	0.217652
YAL014C	0.306418		YBR095C	0.169402		YPL269W	0.171808		YDR464W	0.216451
YOR281C	0.305264		YDL177C	0.168664		YGL172W	0.170808		YLR224W	0.215074
YMR243C	0.302626		YML087C	0.167247		YMR246W	0.170155		YDL197C	0.213866
YNL094W	0.298894		YJR122W	0.166946		YLR200W	0.168909		YHR201C	0.213684
YHR012W	0.296734		YPR065W	0.164312		YNR061C	0.168083		YKR071C	0.21267
YMR303C	0.293136		YJL185C	0.164171		YPR021C	0.167773		YPL089C	0.211073
YKL152C	0.290403		YNL221C	0.162839		YLR289W	0.166369		YJR119C	0.210918
YFL054C	0.288347		YDR054C	0.162482		YNL315C	0.166073		YIR029W	0.209427
YOR283W	0.287639		YGL008C	0.161447		YER077C	0.165258		YGR275W	0.202726
YPL212C	0.286337		YMR303C	0.16044		YJL056C	0.165197		YDL203C	0.201874
YNR026C	0.286321		YDL219W	0.158975		YPR082C	0.164788		YLR393W	0.198955
YNL306W	0.284945		YML071C	0.158618		YHR179W	0.164408		YMR120C	0.198654
YLL019C	0.282053		YKR006C	0.15657		YDR123C	0.159466		YBL002W	0.194679
YHR206W	0.280771		YCR021C	0.153958		YER034W	0.159182		YLR377C	0.191714
YLR066W	0.27938		YGL107C	0.153136		YJL062W-A	0.158853		YNL021W	0.191603
YHR031C	0.279074		YKR067W	0.149905		YFR044C	0.15639		YPR114W	0.190481
YPL146C	0.276221		YLR064W	0.149614		YNL153C	0.155592		YPR152C	0.188972
YML114C	0.275899		YDR259C	0.149317		YPL082C	0.153956		YKL008C	0.186284
YGR191W	0.275433		YDR189W	0.148623		YPR152C	0.153539		YDR383C	0.185732
YLR292C	0.273828		YDR153C	0.148464		YHR008C	0.152675		YPL083C	0.185652
YER158C	0.273791		YLL018C-A	0.148387		YOR198C	0.152218		YNR013C	0.185526
YPR035W	0.27314		YIL013C	0.148145		YML079W	0.151657		YLR082C	0.184979
YLR087C	0.269145		YPR180W	0.148079		YKL018C-A	0.151217		YHR147C	0.184433
YGR136W	0.268024		YDR481C	0.146226		YDR464W	0.148914		YNL130C-A	0.182846
YDR409W	0.266364		YLR429W	0.145056		YOR064C	0.145958		YLR315W	0.180071
YBR069C	0.26616		YHL025W	0.142616		YIL010W	0.145884		YNL185C	0.178525
YPR100W	0.265709		YDR214W	0.142613		YHR057C	0.145496		YLR167W	0.178333
YDL233W	0.265009		YHR031C	0.141144		YKL149C	0.145067		YOL070C	0.178135
YDR056C	0.264678		YKR068C	0.141123		YGL106W	0.144849		YIL024C	0.1778
YDL144C	0.264511		YKR009C	0.139052		YPL206C	0.13917		YIL136W	0.175542
YLR285W	0.263721		YHR092C	0.139051		YGL107C	0.13816		YJR024C	0.174217
YGL062W	0.262923		YLR392C	0.139025		YER019W	0.135666		YPL018W	0.172967
YIL155C	0.261121		YGL256W	0.138117		YLR021W	0.135363		YPR082C	0.172423
YCR072C	0.261024		YER168C	0.137951		YKR006C	0.135039		YKL057C	0.172276
YBL002W	0.260835		YLR094C	0.136919		YDL181W	0.134187		YFR013W	0.171333
YDR009W	0.260301		YJL109C	0.136087		YNL035C	0.133267		YBR098W	0.171129
YBR287W	0.254656		YNL297C	0.135667		YFL055W	0.133083		YDR143C	0.170384
YFR050C	0.253079		YKL176C	0.135073		YER061C	0.132535		YJL065C	0.170209
YKR068C	0.251963		YMR121C	0.133322		YIL016W	0.132186		YBR264C	0.170086
YDR033W	0.25176		YHR012W	0.133303		YDR155C	0.131617		YKL068W-A	0.169626
YKL120W	0.247155		YDR349C	0.132057		YLL048C	0.131276		YLR058C	0.169356
YPR164W	0.246153		YDR518W	0.131711		YER151C	0.129561		YGL023C	0.164271
YBL015W	0.246049		YIR011C	0.130467		YMR080C	0.12861		YNL260C	0.164261
YNL280C	0.245056		YMR204C	0.130437		YPL183W-A	0.128296		YJL216C	0.160411
YER034W	0.244954		YMR043W	0.129774		YOR311C	0.127295		YDR201W	0.160238
YIR033W	0.241723		YPR082C	0.127244		YJL180C	0.127203		YOL130W	0.160188
YOR176W	0.238871		YOR137C	0.127229		YKL057C	0.12583		YDL088C	0.159572
YLR208W	0.238422		YAL034C	0.126752		YBR242W	0.124891		YML107C	0.159427
YNR061C	0.238014		YCL031C	0.125493		YLR180W	0.120487		YER140W	0.158948
YNL315C	0.237171		YBR261C	0.123906		YFL028C	0.120286		YGL143C	0.155229
YBL030C	0.234197		YOR176W	0.123882		YDR037W	0.119952		YPL088W	0.154365
YDR492W	0.233763		YIL016W	0.123819		YHR049W	0.119789		YOR079C	0.153984
YBL037W	0.233743		YDR527W	0.122822		YHR024C	0.119574		YNR061C	0.153962
YHR008C	0.229384		YDR342C	0.122803		YDR009W	0.119159		YDR259C	0.147609
YMR070W	0.226459		YGL043W	0.122566		YHL008C	0.11849		YDR037W	0.146907
YDR384C	0.226099		YGR202C	0.113258		YLR285W	0.117005		YOR281C	0.14642
YKR006C	0.225019		YML123C	0.110854		YMR073C	0.115259		YKR038C	0.146188
YOL122C	0.223079		YNL021W	0.108389		YLR064W	0.112725		YJR118C	0.144655
YNR027W	0.220077		YML112W	0.108169		YGL008C	0.112538		YPL213W	0.144151
YNL101W	0.219725		YGL146C	0.10646		YML114C	0.109729		YJR046W	0.143565
YHR201C	0.218479		YJL084C	0.102176		YHR187W	0.109434		YBL015W	0.136576
YKL175W	0.214327		YFL030W	0.101048		YGL143C	0.108792		YEL046C	0.135578
YPL015C	0.212933		YHR187W	0.100379		YOR262W	0.10738		YDR463W	0.132859
YLR387C	0.212031		YOR311C	0.096968		YMR042W	0.107235		YDR503C	0.130858
YKL168C	0.21104		YPR138C	0.096602		YML131W	0.106655		YLR180W	0.130668
YLL018C-A	0.2106		YNL270C	0.089866		YLR208W	0.106529		YDR026C	0.129114
YER130C	0.206928		YML050W	0.089333		YMR006C	0.106131		YGR082W	0.12686
YNR016C	0.206693		YDL197C	0.088845		YBR299W	0.105397		YGL172W	0.11881
YNL141W	0.206679		YPL201C	0.087328		YMR166C	0.104821		YPL014W	0.117943
YLR223C	0.205742		YLR285W	0.08259		YPL134C	0.104077		YER182W	0.113854
YOL086W-A	0.205651		YDR318W	0.08248		YDR026C	0.103856		YLR199C	0.111967
YOR109W	0.200017		YML054C	0.081261		YGL155W	0.103206		YER132C	0.110584
YJL042W	0.198879		YOR267C	0.079702		YDL235C	0.103086		YMR234W	0.110073
YDR055W	0.19575		YEL057C	0.079194		YEL020W-A	0.102824		YDL219W	0.109947
YGR234W	0.194761		YGR003W	0.079029		YNL190W	0.102686		YPL042C	0.10874
YOR085W	0.194609		YOR087W	0.0787		YKL175W	0.102616		YKL093W	0.108602
YIL124W	0.19365		YGL080W	0.077303		YJL005W	0.101188		YNL202W	0.107902
YJR075W	0.192177		YOR099W	0.077284		YOR321W	0.101186		YHL024W	0.10631
YNL009W	0.19215		YOL033W	0.074844		YMR060C	0.100519		YEL017C-A	0.104003
YPL008W	0.190052		YAR014C	0.074441		YIR004W	0.100101		YMR171C	0.103551
YER151C	0.184614		YOL066C	0.074088		YER140W	0.09977		YGL106W	0.100299
YGL017W	0.182521		YNL177C	0.072795		YKR009C	0.097063		YPL200W	0.097067
YDL214C	0.18201		YJR118C	0.072141		YCL029C	0.09518		YMR043W	0.096011
YCL005W	0.180353		YLR179C	0.071835		YDR148C	0.094923		YPR164W	0.093449
YDL194W	0.180277		YLR437C	0.07155		YBL093C	0.09419		YBR148W	0.09044
YCR059C	0.180213		YHR008C	0.070264		YMR226C	0.091587		YDR163W	0.088207
YLR270W	0.179239		YGL083W	0.070073		YER055C	0.087192		YER061C	0.088198
YDR257C	0.177677		YOR198C	0.069079		YHR011W	0.086459		YPL183W-A	0.088148
YDR100W	0.176925		YOL087C	0.068834		YER001W	0.083775		YOR064C	0.084742
YOR267C	0.175563		YLR066W	0.067985		YLR179C	0.082899		YGL091C	0.08441
YJR138W	0.174195		YMR280C	0.067327		YIL160C	0.082828		YDL189W	0.084388
YDR533C	0.173757		YOL019W	0.06544		YKR042W	0.081461		YER168C	0.083444
YGL107C	0.172574		YDL048C	0.064195		YPL199C	0.07787		YML071C	0.082293
YNR001C	0.171837		YPR001W	0.064182		YDR316W	0.076704		YLR194C	0.082282
YOR093C	0.171824		YER019W	0.063463		YOR168W	0.07655		YKL062W	0.08067
YOR051C	0.171724		YIL055C	0.063311		YBR264C	0.076188		YER151C	0.079873
YPL030W	0.170199		YPR152C	0.062966		YPR003C	0.075224		YMR214W	0.07901
YPL178W	0.166284		YKR071C	0.0628		YHR031C	0.074652		YMR011W	0.078561
YDR143C	0.165859		YGR278W	0.06259		YIR032C	0.0739		YML081C-A	0.077535
YPR082C	0.164813		YDL200C	0.062153		YMR171C	0.073858		YGL107C	0.076461
YJR095W	0.16152		YNL036W	0.06147		YIR033W	0.073162		YDR459C	0.076387
YJL066C	0.159973		YJL217W	0.061256		YOL152W	0.072597		YOR118W	0.075306
YER163C	0.15952		YIR021W	0.059722		YOR077W	0.071461		YFL059W	0.07474
YML112W	0.158677		YPR100W	0.057853		YDR079W	0.071083		YPR025C	0.074468
YLR275W	0.156519		YPR114W	0.056484		YDR349C	0.069436		YPL094C	0.074214
YLR260W	0.155981		YPR021C	0.050521		YML050W	0.069383		YGR076C	0.073423
YFL059W	0.154795		YGL255W	0.049968		YHR113W	0.068827		YBL093C	0.072422
YDR349C	0.154563		YGR180C	0.049373		YDR511W	0.068735		YPR094W	0.072012
YPR165W	0.150702		YIL117C	0.047842		YNL262W	0.066499		YIL016W	0.066818
YOL151W	0.147924		YPR084W	0.046917		YKL176C	0.065795		YJR075W	0.066129
YDR214W	0.146984		YCL029C	0.046689		YJL024C	0.063737		YOL066C	0.06564
YKR065C	0.14436		YNL304W	0.046289		YJR138W	0.060439		YER173W	0.064535
YGL181W	0.143289		YPL134C	0.045507		YEL017C-A	0.060207		YER115C	0.063736
YKR055W	0.142243		YAL014C	0.042845		YDR304C	0.060102		YMR206W	0.061359
YDR383C	0.141286		YPL103C	0.041496		YER052C	0.060029		YNL142W	0.061311
YDR054C	0.140949		YDR326C	0.041119		YMR240C	0.058994		YIR035C	0.06097
YCR016W	0.138653		YPL083C	0.039991		YBL037W	0.058957		YDR384C	0.058394
YJL109C	0.134522		YIL056W	0.039676		YHR076W	0.058355		YLR295C	0.055453
YJR133W	0.133418		YKL072W	0.039503		YMR024W	0.058153		YDR088C	0.054269
YMR226C	0.132632		YBR010W	0.039366		YCR012W	0.057842		YBR010W	0.053757
YNL021W	0.130578		YPR025C	0.037409		YHR164C	0.056504		YDL049C	0.053655
YDL197C	0.129659		YML009C	0.034031		YPR025C	0.056055		YDR148C	0.052153
YDR155C	0.128626		YNL251C	0.033668		YGR275W	0.055844		YDR318W	0.052076
YDR518W	0.127499		YNL252C	0.032961		YDL224C	0.054394		YIR001C	0.051454
YCR043C	0.126114		YLR020C	0.032929		YJR119C	0.054394		YDL079C	0.050074
YER144C	0.124695		YAL047C	0.032649		YIL076W	0.054374		YPL082C	0.047506
YGL220W	0.122352		YFR024C-A	0.03239		YER093C-A	0.05169		YDR349C	0.046848
YJL082W	0.120585		YLL048C	0.031393		YLL019C	0.048126		YPR165W	0.042712
YMR149W	0.119424		YNL094W	0.029094		YOR109W	0.047473		YPR182W	0.042394
YMR121C	0.119393		YOL109W	0.028189		YDL237W	0.046866		YPR062W	0.041826
YKL018C-A	0.11818		YLR233C	0.027221		YMR315W	0.044528		YPR084W	0.041672
YJL217W	0.116913		YDR088C	0.026839		YPL074W	0.042133		YJL110C	0.040899
YIL056W	0.115055		YDL235C	0.026681		YNL306W	0.042082		YKL196C	0.040303
YGL143C	0.113785		YNL202W	0.026327		YOL019W	0.041542		YNL213C	0.039923
YKR038C	0.11308		YER158C	0.024875		YOR067C	0.040161		YPL099C	0.038599
YOR087W	0.110833		YGR246C	0.02303		YPL234C	0.037058		YPR017C	0.037497
YER052C	0.10969		YJL034W	0.023001		YDL219W	0.036562		YMR137C	0.033079
YDL189W	0.108688		YNR001C	0.022167		YLR335W	0.036028		YDR528W	0.032883
YLR224W	0.10731		YAL017W	0.020211		YPL008W	0.035923		YDR189W	0.030046
YGR243W	0.105895		YMR137C	0.019425		YNL086W	0.035072		YLR437C	0.028151
YGL172W	0.105157		YML011C	0.019236		YOR129C	0.03431		YDL233W	0.027796
YDR488C	0.104406		YDR148C	0.016024		YHR129C	0.033138		YNL315C	0.027685
YJL194W	0.10405		YPR035W	0.014681		YKR088C	0.029393		YJR133W	0.026368
YKL163W	0.103802		YGL155W	0.014092		YPR184W	0.029383		YLR085C	0.025409
YHR129C	0.10312		YPL269W	0.01405		YDL177C	0.02841		YBR208C	0.022944
YAL059W	0.102925		YNL253W	0.013512		YMR231W	0.028326		YLR289W	0.019563
YHR037W	0.102723		YLR382C	0.011263		YDR121W	0.02797		YMR204C	0.01817
YNL177C	0.101849		YBL030C	0.010309		YLR429W	0.027721		YPR180W	0.017826
YER035W	0.100227		YOR276W	0.009088		YLR013W	0.026542		YDL235C	0.016675
YOL019W	0.0994		YGL154C	0.008464		YOL086W-A	0.023879		YMR121C	0.012261
YDR110W	0.095879		YMR240C	0.005867		YHR027C	0.023143		YPL106C	0.01132
YIR029W	0.094133		YPR182W	0.005625		YDR240C	0.022772		YCL056C	0.008947
YPR037C	0.093854		YJL103C	0.003969		YPR031W	0.021409		YPL199C	0.007493
YHR038W	0.093426		YER093C-A	0.003765		YPL014W	0.021399		YML087C	0.00742
YGL091C	0.093253		YLR205C	0.00324		YAL038W	0.020445		YHR076W	0.006327
YOR222W	0.093062		YOL143C	0.001041		YJR073C	0.020102		YLR087C	0.005841
YJL103C	0.090347		YJL196C	-0.001831		YOR087W	0.018196		YNL032W	0.005015
YLR222C	0.088229		YNR013C	-0.003701		YDR347W	0.017842		YGR246C	0.003954
YLL001W	0.088027		YMR060C	-0.005007		YML072C	0.01747		YBR185C	0.002968
YLR295C	0.087207		YKL120W	-0.00549		YDL090C	0.016543		YPL221W	0.001552
YML007W	0.086688		YML092C	-0.008015		YIL056W	0.015616		YBL057C	0.001276
YDR482C	0.084455		YIL158W	-0.008307		YDR189W	0.015231		YBR095C	7.9e-05
YOL033W	0.084187		YDR026C	-0.008907		YHR092C	0.014764		YIR004W	-0.000812
YDR019C	0.083905		YOL089C	-0.011135		YDR538W	0.014524		YIL044C	-0.002363
YOR113W	0.082856		YHR206W	-0.012322		YDL108W	0.013088		YOR311C	-0.002976
YOR064C	0.082461		YDR129C	-0.01383		YBL002W	0.012192		YLR375W	-0.004201
YGL155W	0.081853		YDL203C	-0.01525		YDR158W	0.012183		YHR179W	-0.007313
YBR230W-A	0.079015		YLR387C	-0.015466		YIL087C	0.010141		YNL101W	-0.011674
YOL070C	0.077217		YPL213W	-0.017487		YAR014C	0.009931		YKL028W	-0.015132
YKL099C	0.074144		YJR119C	-0.017763		YLR300W	0.008682		YOR330C	-0.015399
YOL045W	0.072038		YGL169W	-0.020833		YLR390W	0.007766		YBR120C	-0.017048
YDL215C	0.071822		YMR232W	-0.020929		YER144C	0.007206		YGR016W	-0.017089
YMR166C	0.071658		YMR011W	-0.021221		YPL097W	0.007202		YER019W	-0.017884
YDR041W	0.069241		YDR538W	-0.021235		YPL104W	0.006058		YKR088C	-0.018991
YDR099W	0.06826		YHR027C	-0.021681		YLR058C	0.00594		YHL016C	-0.019297
YLR438C-A	0.06754		YBL037W	-0.021726		YIR011C	0.005921		YPR086W	-0.019821
YDR189W	0.06555		YMR206W	-0.021911		YOR283W	0.005606		YLL048C	-0.021076
YGR163W	0.065096		YDL111C	-0.023988		YJL109C	0.004318		YOL052C-A	-0.02182
YNL270C	0.065035		YGR239C	-0.025094		YLR273C	0.004277		YGL154C	-0.021999
YOR337W	0.063056		YMR070W	-0.025233		YPL221W	0.002434		YMR033W	-0.022342
YCR009C	0.061507		YGR275W	-0.025747		YIL158W	0.001889		YLR307W	-0.022565
YEL071W	0.059627		YML058W	-0.0273		YHR063C	0.001743		YLR004C	-0.023673
YIL070C	0.059609		YLR244C	-0.031419		YDL214C	0		YGR180C	-0.028255
YGR241C	0.059043		YPR155C	-0.032378		YIR039C	-0.002		YLR024C	-0.028256
YAL034C	0.05679		YKL141W	-0.03447		YJL196C	-0.003094		YJL181W	-0.028527
YNL253W	0.0564		YNR015W	-0.034541		YOR276W	-0.004853		YLR301W	-0.028695
YMR033W	0.055521		YNL260C	-0.034843		YLR113W	-0.006061		YNL086W	-0.029361
YBR264C	0.055462		YBL059W	-0.035868		YHR116W	-0.006278		YHR202W	-0.031031
YHR057C	0.055432		YLR024C	-0.036441		YKL093W	-0.006724		YAL034C	-0.031036
YPR025C	0.053973		YLR304C	-0.036593		YIL014C-A	-0.006956		YPR171W	-0.032201
YKL141W	0.053923		YJL171C	-0.038878		YIL055C	-0.007552		YOR267C	-0.032689
YER077C	0.051662		YLR300W	-0.039071		YKL028W	-0.007884		YLR174W	-0.033123
YOR286W	0.050388		YLR021W	-0.039976		YFL031W	-0.010243		YDR019C	-0.033254
YML087C	0.048277		YGR161C	-0.04034		YOL070C	-0.011064		YHL025W	-0.034871
YEL066W	0.047585		YOL126C	-0.04048		YKR038C	-0.012667		YML068W	-0.035069
YPR171W	0.047351		YPL200W	-0.043141		YFL010C	-0.012972		YBR255C-A	-0.036469
YPL099C	0.047156		YOL101C	-0.043361		YER027C	-0.013417		YKL084W	-0.038127
YJR122W	0.045323		YDR409W	-0.043405		YDR383C	-0.014597		YOL109W	-0.039604
YMR026C	0.045237		YLR085C	-0.043521		YGL255W	-0.015205		YLR066W	-0.040938
YJL024C	0.042116		YJL005W	-0.044224		YGR239C	-0.015429		YHL008C	-0.04218
YDL090C	0.041689		YNL274C	-0.044751		YIL024C	-0.017475		YLR292C	-0.044694
YDL111C	0.041558		YMR234W	-0.045493		YOL154W	-0.018716		YEL066W	-0.049835
YFR004W	0.035172		YAL021C	-0.045674		YBR185C	-0.019614		YKL112W	-0.050615
YFR025C	0.034907		YIR001C	-0.048065		YOL045W	-0.021152		YLL055W	-0.051088
YPR180W	0.034665		YHR132C	-0.048345		YPL250C	-0.023865		YOR262W	-0.051326
YFR013W	0.034294		YOR306C	-0.048966		YBL015W	-0.024077		YJL059W	-0.051583
YBR290W	0.03402		YER180C	-0.049076		YNL021W	-0.024578		YOL101C	-0.054775
YDL113C	0.032622		YHR176W	-0.049613		YNL217W	-0.024718		YGR239C	-0.056085
YPL133C	0.031143		YHL032C	-0.051185		YNL311C	-0.025581		YGR118W	-0.058134
YER001W	0.029757		YML079W	-0.051819		YMR234W	-0.025907		YPR133C	-0.058533
YGL242C	0.028994		YGL106W	-0.052032		YJR122W	-0.026677		YLL007C	-0.059846
YLR064W	0.028823		YER151C	-0.052781		YPL178W	-0.026869		YDR347W	-0.063071
YNL311C	0.026814		YDL007W	-0.054107		YML042W	-0.027084		YER130C	-0.0659
YDL079C	0.026713		YPL014W	-0.054209		YDL189W	-0.027313		YLR382C	-0.067112
YLR250W	0.021835		YFL031W	-0.055697		YDR326C	-0.030213		YOR093C	-0.068429
YML071C	0.020571		YDR316W	-0.056446		YDL007W	-0.030466		YML058W	-0.068551
YGR275W	0.0187		YNL217W	-0.056474		YKL068W-A	-0.03055		YGL090W	-0.06912
YLR258W	0.017971		YDR163W	-0.056964		YPL177C	-0.030772		YDR153C	-0.070945
YMR120C	0.016864		YLR200W	-0.058037		YCL011C	-0.031114		YOL105C	-0.072686
YCR024C-A	0.016682		YLL007C	-0.058633		YDL233W	-0.031882		YNR001C	-0.072715
YNL032W	0.015669		YOR209C	-0.060199		YNL270C	-0.032231		YOR085W	-0.074007
YKL195W	0.015081		YMR042W	-0.060638		YKL152C	-0.03281		YHR113W	-0.074379
YKL196C	0.014318		YLR087C	-0.061079		YDL098C	-0.033003		YGL255W	-0.076209
YDR375C	0.013477		YNR039C	-0.061515		YER149C	-0.033045		YGR289C	-0.076727
YBR185C	0.012732		YIL057C	-0.063037		YDL123W	-0.033912		YPL103C	-0.077651
YMR024W	0.012015		YJL082W	-0.063389		YPL213W	-0.034329		YBL037W	-0.079489
YHR162W	0.011835		YBR068C	-0.063634		YDR129C	-0.03451		YBL030C	-0.081092
YOR321W	0.011619		YDR380W	-0.064025		YNL117W	-0.036292		YKR042W	-0.083148
YBR242W	0.010662		YMR266W	-0.065423		YJR133W	-0.037821		YMR266W	-0.084625
YOR299W	0.010598		YOR338W	-0.067763		YHR012W	-0.038509		YMR231W	-0.091791
YKL187C	0.010506		YDR201W	-0.069082		YDR459C	-0.039778		YMR246W	-0.09202
YNL173C	0.010156		YER030W	-0.069234		YLR167W	-0.040314		YML054C	-0.092328
YPR031W	0.007649		YDR034C	-0.06993		YML092C	-0.042357		YLL060C	-0.092846
YLR200W	0.006617		YPR062W	-0.070235		YPR133C	-0.043536		YMR289W	-0.09384
YGL255W	0.006361		YLR283W	-0.071733		YGR278W	-0.043748		YNL306W	-0.095737
YOR252W	0.004844		YOR079C	-0.07175		YDR068W	-0.045059		YEL071W	-0.09648
YPL147W	0.00186		YPL015C	-0.074822		YFR032C-A	-0.045847		YGL226W	-0.097716
YJR073C	-0.003441		YKL163W	-0.075881		YDL130W-A	-0.046299		YOL033W	-0.098044
YLR390W	-0.005785		YLR260W	-0.076464		YDR257C	-0.046447		YMR006C	-0.099556
YDR527W	-0.006132		YLL001W	-0.079009		YLL060C	-0.046669		YDR151C	-0.100096
YPL113C	-0.009081		YLR292C	-0.079448		YDR256C	-0.047846		YOR180C	-0.101171
YKR071C	-0.011804		YLR082C	-0.081812		YHR124W	-0.05109		YLR208W	-0.103605
YDR153C	-0.013764		YDR018C	-0.082105		YGL043W	-0.051811		YDR132C	-0.105297
YDR059C	-0.014234		YLR016C	-0.082633		YGR241C	-0.052634		YNL311C	-0.10636
YGL043W	-0.01578		YMR120C	-0.082918		YIL033C	-0.053895		YNL270C	-0.106593
YBR033W	-0.016284		YMR091C	-0.085024		YER182W	-0.054118		YIR033W	-0.107102
YOR374W	-0.01705		YKL051W	-0.085028		YNL026W	-0.054272		YGR225W	-0.109342
YNL106C	-0.019189		YFR044C	-0.089019		YGR003W	-0.054283		YER139C	-0.110372
YPR030W	-0.020039		YGR055W	-0.08902		YNL037C	-0.055248		YKL163W	-0.111942
YDL219W	-0.020754		YCR005C	-0.091334		YGL083W	-0.056554		YLR304C	-0.112766
YER140W	-0.021899		YLR333C	-0.091528		YBR095C	-0.060506		YDR034C	-0.11318
YDR266C	-0.023772		YMR024W	-0.09303		YOL038W	-0.061379		YER024W	-0.114375
YLR392C	-0.024409		YDR240C	-0.094793		YBL005W	-0.061502		YDL215C	-0.114477
YMR060C	-0.02686		YGL226W	-0.094855		YGR232W	-0.064549		YBR107C	-0.114831
YDR132C	-0.028274		YHL008C	-0.09673		YGR246C	-0.066424		YBR138C	-0.115257
YGL169W	-0.028362		YER048W-A	-0.098545		YPL133C	-0.067085		YFL054C	-0.118937
YDR326C	-0.029273		YOR374W	-0.099413		YGL257C	-0.067492		YER163C	-0.119403
YMR231W	-0.029371		YER115C	-0.101666		YKR055W	-0.0686		YHR137W	-0.119927
YGR239C	-0.029993		YDR228C	-0.103123		YCR083W	-0.069697		YML079W	-0.120706
YDR034C	-0.03088		YDL194W	-0.10326		YGL026C	-0.070529		YDR090C	-0.123048
YGR232W	-0.033875		YDL098C	-0.10567		YNL122C	-0.071019		YGL017W	-0.123909
YGR047C	-0.03548		YDL115C	-0.106696		YDR214W	-0.072129		YIL076W	-0.126495
YER040W	-0.037366		YGR241C	-0.108228		YOR222W	-0.072217		YLR013W	-0.128655
YER019W	-0.037779		YKL018C-A	-0.110556		YIR029W	-0.072914		YLR387C	-0.129804
YMR126C	-0.040497		YKL175W	-0.111267		YJR141W	-0.073135		YDR056C	-0.130602
YOL052C-A	-0.047916		YMR073C	-0.112181		YHR068W	-0.073859		YGR276C	-0.130925
YHR187W	-0.049229		YKL093W	-0.112959		YOR085W	-0.074314		YPR100W	-0.134179
YKR049C	-0.051526		YEL038W	-0.113106		YNL142W	-0.074697		YDR033W	-0.136735
YKL149C	-0.058751		YMR231W	-0.113334		YOL033W	-0.076183		YMR009W	-0.138718
YPR133C	-0.059444		YMR080C	-0.113617		YNL251C	-0.077455		YHR057C	-0.13917
YJR043C	-0.064219		YLR004C	-0.114459		YMR091C	-0.077638		YKR002W	-0.139195
YER182W	-0.066201		YML107C	-0.114711		YHR202W	-0.078837		YHR116W	-0.140612
YDR026C	-0.066924		YKL152C	-0.114911		YMR289W	-0.078952		YPL147W	-0.140955
YGL226W	-0.071057		YPR165W	-0.11509		YKL208W	-0.080665		YHR132C	-0.142531
YBR225W	-0.071896		YNL086W	-0.115645		YIL155C	-0.080726		YHR124W	-0.142739
YDL108W	-0.072731		YER055C	-0.115778		YFR055W	-0.080903		YGR240C	-0.143572
YDR503C	-0.07578		YML007W	-0.116631		YPR084W	-0.082288		YNL190W	-0.14569
YOR198C	-0.077074		YNL141W	-0.117423		YPR040W	-0.084555		YER034W	-0.147905
YDR228C	-0.07911		YNL307C	-0.117972		YGR276C	-0.08477		YMR026C	-0.148662
YMR206W	-0.080588		YOR067C	-0.119407		YMR026C	-0.085784		YGL080W	-0.148666
YOR111W	-0.080848		YPR037C	-0.120078		YFR031C	-0.086192		YMR042W	-0.149618
YHR164C	-0.081917		YMR028W	-0.120097		YDR055W	-0.086747		YML009C	-0.150698
YLR149C	-0.082005		YHR063C	-0.120109		YOR330C	-0.087112		YDL115C	-0.151306
YBL059W	-0.08273		YPL077C	-0.12013		YNL307C	-0.087437		YNR010W	-0.153581
YPR075C	-0.083708		YFL033C	-0.121553		YNL009W	-0.087602		YDL144C	-0.154511
YMR028W	-0.085361		YLR167W	-0.121837		YIL161W	-0.088377		YMR024W	-0.154896
YBR095C	-0.085746		YDR536W	-0.122427		YGR152C	-0.088649		YOR099W	-0.155544
YKL165C	-0.085747		YGR016W	-0.125742		YOR374W	-0.088936		YDR126W	-0.155862
YIL076W	-0.093955		YLL055W	-0.127292		YDR228C	-0.089945		YPR002W	-0.159553
YGL083W	-0.095165		YOR093C	-0.127475		YKL096C-B	-0.090507		YMR060C	-0.161277
YLR307W	-0.095955		YER163C	-0.12817		YOL109W	-0.090806		YCL011C	-0.164384
YKL100C	-0.098485		YPL089C	-0.129452		YFR025C	-0.090837		YGR047C	-0.166753
YKL208W	-0.098973		YKL096C-B	-0.129562		YPR165W	-0.090899		YPR156C	-0.168337
YGR246C	-0.099208		YDL224C	-0.131786		YDR457W	-0.091119		YDL194W	-0.172149
YBR183W	-0.099793		YPR017C	-0.132913		YGR202C	-0.091342		YKL176C	-0.172471
YDR111C	-0.100961		YOR129C	-0.1336		YGR067C	-0.091604		YLR247C	-0.172937
YNL213C	-0.102616		YPL104W	-0.137441		YBR137W	-0.095724		YOR198C	-0.173528
YDL123W	-0.108666		YHL016C	-0.140252		YLR016C	-0.095862		YDR228C	-0.173562
YPL206C	-0.108677		YOR077W	-0.14053		YER065C	-0.096957		YOR164C	-0.174673
YCL029C	-0.108734		YGL091C	-0.142351		YDR466W	-0.097607		YDR214W	-0.176082
YNL304W	-0.111262		YDR123C	-0.142393		YPL099C	-0.097705		YIL014C-A	-0.17626
YMR009W	-0.113742		YGR138C	-0.144391		YMR043W	-0.097814		YCR097W	-0.176541
YDR337W	-0.113753		YKL107W	-0.145599		YAL041W	-0.097838		YMR243C	-0.177167
YER027C	-0.114005		YMR026C	-0.146015		YMR195W	-0.098316		YGR020C	-0.177343
YER093C-A	-0.115552		YGR118W	-0.146381		YFL054C	-0.098742		YDR326C	-0.177458
YML050W	-0.115941		YLR393W	-0.147452		YAL047C	-0.099004		YOR388C	-0.177764
YNL262W	-0.11788		YGL181W	-0.147528		YLR233C	-0.099717		YBR054W	-0.1784
YAL047C	-0.118953		YPL099C	-0.147812		YDR337W	-0.10019		YJR138W	-0.180853
YDL177C	-0.119078		YOR279C	-0.150408		YDL088C	-0.100612		YJL180C	-0.181481
YFR031C	-0.121514		YJR019C	-0.151986		YOL122C	-0.101131		YDR316W	-0.182056
YGR003W	-0.121699		YGR240C	-0.153562		YML007W	-0.102281		YCR005C	-0.183797
YIR001C	-0.125403		YKR038C	-0.155021		YLR330W	-0.103035		YGR055W	-0.184149
YBR275C	-0.129333		YJL059W	-0.156831		YJR034W	-0.103182		YPL134C	-0.190917
YML054C	-0.129353		YIL044C	-0.157213		YMR126C	-0.103226		YGR174C	-0.193318
YFR049W	-0.130432		YER034W	-0.157361		YLR260W	-0.103232		YDR079W	-0.19463
YER168C	-0.131204		YBR033W	-0.159898		YHR176W	-0.103291		YGR191W	-0.196143
YLL007C	-0.131698		YPL159C	-0.161567		YIL044C	-0.103587		YDL200C	-0.199067
YKL093W	-0.133356		YOR299W	-0.164067		YDR163W	-0.104116		YPR005C	-0.199076
YIL087C	-0.133559		YPL199C	-0.164905		YNL087W	-0.104204		YDR057W	-0.199674
YDR256C	-0.133824		YIL124W	-0.167509		YNL280C	-0.104456		YMR280C	-0.201604
YKR067W	-0.134825		YPR133C	-0.168554		YDR088C	-0.105075		YGL008C	-0.202694
YBR269C	-0.136813		YLR289W	-0.169089		YPR086W	-0.106854		YNL177C	-0.204571
YDR304C	-0.138028		YGR136W	-0.169803		YLR194C	-0.106969		YDR337W	-0.206005
YJR119C	-0.138238		YOL152W	-0.171805		YML071C	-0.10767		YGR243W	-0.207789
YNR015W	-0.140115		YOL100W	-0.173278		YDR463W	-0.110832		YDR403W	-0.208307
YDL098C	-0.141959		YDR056C	-0.173698		YBR255C-A	-0.111384		YDL224C	-0.209951
YPL223C	-0.142582		YOL122C	-0.174213		YDL200C	-0.111764		YPL074W	-0.211661
YMR234W	-0.143474		YDL189W	-0.174509		YLR004C	-0.112124		YNL307C	-0.212637
YBL057C	-0.143606		YDR248C	-0.175308		YDR041W	-0.112789		YPR040W	-0.215301
YER061C	-0.144358		YLR180W	-0.1767		YKL053C-A	-0.112879		YMR149W	-0.216951
YNL098C	-0.144501		YAL067C	-0.176793		YGR189C	-0.114512		YJL144W	-0.217757
YDR118W	-0.146981		YCL056C	-0.176934		YPL202C	-0.114724		YLR225C	-0.218437
YHL008C	-0.147923		YBR255C-A	-0.177421		YLR085C	-0.115797		YNL304W	-0.219342
YPL269W	-0.150722		YIR033W	-0.177852		YGL087C	-0.118886		YHR012W	-0.219712
YPL213W	-0.153239		YBR299W	-0.1796		YLR174W	-0.119485		YHR162W	-0.221591
YIL057C	-0.155909		YOR388C	-0.180523		YML009C	-0.120609		YLL001W	-0.223088
YJL185C	-0.156158		YDL154W	-0.183078		YLR382C	-0.121473		YNL012W	-0.22478
YDR088C	-0.156555		YDR099W	-0.18375		YMR120C	-0.122582		YKL072W	-0.226617
YDR085C	-0.158992		YHR208W	-0.184554		YDR481C	-0.123028		YML050W	-0.228651
YOR168W	-0.167569		YBR120C	-0.185327		YMR298W	-0.124439		YGL083W	-0.229632
YER115C	-0.167739		YDR533C	-0.189393		YLR393W	-0.124915		YHR132W-A	-0.231803
YDR090C	-0.168534		YPL094C	-0.191139		YJL185C	-0.126206		YOR286W	-0.232131
YIL158W	-0.169791		YDL123W	-0.191947		YOL089C	-0.127809		YJL194W	-0.232729
YDR068W	-0.17156		YJR138W	-0.192464		YOL128C	-0.128891		YMR166C	-0.233227
YGR118W	-0.171848		YOL130W	-0.195851		YAL067C	-0.129723		YOL152W	-0.235187
YLR021W	-0.175144		YGL172W	-0.196427		YPR180W	-0.131524		YLR113W	-0.235257
YML091C	-0.179296		YML081C-A	-0.197144		YDL154W	-0.134444		YHR164C	-0.235513
YGR020C	-0.180734		YGL220W	-0.197405		YOR164C	-0.135773		YGL125W	-0.238238
YDR316W	-0.182832		YGR163W	-0.198659		YDL194W	-0.136385		YGL242C	-0.239173
YPR084W	-0.183452		YOR230W	-0.198792		YNL101W	-0.136886		YGL162W	-0.239656
YMR240C	-0.188173		YOR281C	-0.199184		YBR042C	-0.137786		YMR298W	-0.242199
YPR003C	-0.190725		YJL042W	-0.200545		YDR179W-A	-0.139138		YOL126C	-0.243752
YLR333C	-0.19396		YER173W	-0.202429		YMR121C	-0.139929		YML072C	-0.246546
YLR024C	-0.198712		YHR124W	-0.203114		YGR163W	-0.141109		YMR178W	-0.247511
YOR357C	-0.1996		YPL196W	-0.203553		YOR111W	-0.143991		YNL009W	-0.248477
YIL105C	-0.20124		YGR225W	-0.203746		YJL084C	-0.145194		YOR177C	-0.251878
YPL250C	-0.202034		YBR264C	-0.205778		YLL050C	-0.145616		YJL037W	-0.252726
YLR085C	-0.203355		YDR037W	-0.212599		YNL173C	-0.149181		YBR183W	-0.253501
YDR536W	-0.20403		YJL181W	-0.213421		YOR306C	-0.149688		YOL100W	-0.254066
YGL044C	-0.20522		YOR111W	-0.214075		YNL094W	-0.150339		YDL090C	-0.25597
YKL062W	-0.20574		YPL252C	-0.215016		YFL033C	-0.151053		YLR330W	-0.262587
YKL028W	-0.208381		YHR126C	-0.215495		YDR375C	-0.155906		YJL217W	-0.263704
YML081C-A	-0.209572		YDR158W	-0.218389		YDR034C	-0.156471		YPR021C	-0.267959
YKL096C-B	-0.21174		YIR039C	-0.219917		YGR136W	-0.159301		YKR006C	-0.268777
YDR466W	-0.212165		YDR337W	-0.221612		YKL196C	-0.161418		YML059C	-0.2699
YDR018C	-0.214261		YOR085W	-0.221811		YPL223C	-0.162796		YLR283W	-0.270456
YDL170W	-0.216101		YJL180C	-0.222428		YPL042C	-0.164773		YJL170C	-0.270548
YKL084W	-0.216777		YPL026C	-0.222684		YOR079C	-0.165768		YHL032C	-0.272367
YDL142C	-0.218734		YAL055W	-0.22628		YJR148W	-0.166925		YMR095C	-0.273319
YDR528W	-0.220221		YLR301W	-0.227063		YDR248C	-0.167566		YHR087W	-0.273642
YCR005C	-0.220282		YHR162W	-0.227272		YHR162W	-0.168135		YNL250W	-0.27765
YJR118C	-0.220498		YKL028W	-0.229335		YLR121C	-0.168825		YPR001W	-0.27932
YHR011W	-0.22402		YGR058W	-0.230796		YHR208W	-0.173276		YDR173C	-0.280152
YAL041W	-0.225368		YNL280C	-0.233062		YHR038W	-0.177291		YER055C	-0.280715
YBR230C	-0.229167		YOR109W	-0.234612		YBR056W-A	-0.17823		YOR222W	-0.284009
YKR088C	-0.229282		YER035W	-0.236698		YDR054C	-0.179125		YKR005C	-0.284541
YNL086W	-0.230054		YDR459C	-0.238761		YDR512C	-0.180184		YPL060W	-0.285917
YOL109W	-0.232784		YER182W	-0.239285		YDR090C	-0.182546		YKL096C-B	-0.28621
YPL183W-A	-0.233522		YMR009W	-0.240178		YDR035W	-0.183809		YFL052W	-0.28663
YDR511W	-0.234367		YKL217W	-0.240613		YKR071C	-0.184949		YJL058C	-0.288078
YPL097W	-0.236266		YPL234C	-0.240681		YOR118W	-0.185849		YPR030W	-0.288258
YHR132W-A	-0.240361		YEL071W	-0.240797		YGR118W	-0.187656		YAL021C	-0.290382
YBR255C-A	-0.241616		YLR113W	-0.243567		YBR208C	-0.189067		YGR021W	-0.290786
YLR377C	-0.243192		YNL250W	-0.243568		YGL091C	-0.190554		YDR342C	-0.292031
YDR352W	-0.245214		YJL056C	-0.244639		YER180C	-0.193389		YCR024C-A	-0.292231
YLL050C	-0.247111		YLR247C	-0.246805		YNL177C	-0.194049		YER027C	-0.294121
YKL008C	-0.247411		YCR024C-A	-0.247578		YER173W	-0.194103		YPR075C	-0.296031
YKL128C	-0.248119		YJL058C	-0.252286		YGR174C	-0.194187		YAL038W	-0.29646
YDR240C	-0.249681		YHR202W	-0.252465		YDR118W	-0.194979		YER054C	-0.298392
YMR042W	-0.251532		YNL106C	-0.252975		YNL253W	-0.195746		YPL177C	-0.299401
YDL049C	-0.256584		YNL035C	-0.254182		YML011C	-0.197159		YPL097W	-0.302086
YDR201W	-0.257333		YML015C	-0.254844		YPL106C	-0.197886		YDR357C	-0.307544
YIL121W	-0.258874		YDR492W	-0.255652		YBR233W-A	-0.198447		YDR055W	-0.312345
YMR152W	-0.258969		YOR222W	-0.256226		YDR057W	-0.199674		YPL077C	-0.319875
YBR010W	-0.261376		YOL105C	-0.25934		YFR050C	-0.202941		YGR202C	-0.320987
YDL213C	-0.263785		YNR061C	-0.259539		YKL120W	-0.205156		YDR457W	-0.321303
YDR079W	-0.264183		YPR002W	-0.260818		YNL260C	-0.205247		YOL023W	-0.321703
YAR014C	-0.267319		YDL090C	-0.261496		YDL170W	-0.209677		YGL256W	-0.324112
YML011C	-0.271266		YKL208W	-0.261538		YKL219W	-0.209736		YLR429W	-0.325037
YML015C	-0.271861		YKL128C	-0.263947		YFR004W	-0.210575		YJL185C	-0.325094
YDR163W	-0.272646		YBR225W	-0.264176		YGR076C	-0.212171		YDR466W	-0.330468
YNL122C	-0.274239		YDR466W	-0.268677		YMR033W	-0.21238		YKL018C-A	-0.332569
YDR342C	-0.274392		YDR179W-A	-0.269709		YPR001W	-0.213038		YJL103C	-0.333182
YPL083C	-0.274785		YDL237W	-0.273232		YER040W	-0.214439		YDR481C	-0.335832
YLR289W	-0.275215		YPL183W-A	-0.273264		YOR279C	-0.215848		YGL142C	-0.337599
YBR037C	-0.276796		YFR055W	-0.27435		YCR004C	-0.218291		YIL046W-A	-0.337648
YMR204C	-0.281729		YDR375C	-0.276428		YCR024C-A	-0.220529		YJL062W-A	-0.339615
YNL182C	-0.282587		YJL037W	-0.276523		YDR380W	-0.222399		YER048W-A	-0.339659
YLR382C	-0.28433		YGL162W	-0.276749		YER030W	-0.222854		YAL014C	-0.340384
YML068W	-0.287926		YIL076W	-0.27962		YHL025W	-0.22298		YOL086W-A	-0.344832
YOR285W	-0.288027		YLL060C	-0.280752		YHR037W	-0.226039		YFL028C	-0.344862
YLR225C	-0.288815		YLR295C	-0.283423		YPR002W	-0.22607		YML007W	-0.346267
YOR025W	-0.289099		YBL093C	-0.284026		YMR011W	-0.226505		YGR163W	-0.354224
YGR040W	-0.2896		YFL052W	-0.284032		YGR168C	-0.228614		YER030W	-0.359574
YBL093C	-0.291186		YLR307C-A	-0.288291		YJL042W	-0.229556		YPL196W	-0.363027
YOR291W	-0.295167		YBR098W	-0.290737		YML107C	-0.229705		YGR234W	-0.363133
YMR073C	-0.299186		YIL161W	-0.292178		YNL297C	-0.232074		YMR232W	-0.364838
YGL142C	-0.302547		YDR132C	-0.295757		YBR107C	-0.232548		YJL084C	-0.365034
YGL086W	-0.302946		YKL165C	-0.298107		YJL082W	-0.23328		YDR424C	-0.365955
YML009C	-0.303032		YLR152C	-0.307757		YPR171W	-0.23418		YGR241C	-0.36874
YOR118W	-0.305428		YPL147W	-0.308005		YGL226W	-0.234463		YPL234C	-0.369028
YBR137W	-0.306141		YFR032C-A	-0.30889		YGL044C	-0.234506		YOR109W	-0.372499
YNL274C	-0.306536		YCR059C	-0.309421		YDL215C	-0.234532		YHR024C	-0.37297
YGR021W	-0.307903		YDL144C	-0.313774		YLR387C	-0.237125		YGR136W	-0.37356
YDR463W	-0.30846		YMR322C	-0.313895		YNL213C	-0.23895		YPR184W	-0.373688
YOL105C	-0.30884		YAR009C	-0.313923		YGR021W	-0.239249		YKL208W	-0.375778
YNL026W	-0.310442		YNR010W	-0.315091		YPL083C	-0.240076		YPL092W	-0.377394
YER048W-A	-0.317091		YMR149W	-0.3162		YDR201W	-0.242605		YOL089C	-0.379301
YOR031W	-0.323831		YOL086W-A	-0.319935		YBR290W	-0.24389		YDR375C	-0.381758
YER030W	-0.323925		YHR038W	-0.320147		YAL034C	-0.246374		YOR209C	-0.381812
YOL084W	-0.32474		YIL014C-A	-0.321221		YPL015C	-0.247014		YDL181W	-0.387174
YPR001W	-0.325123		YLR013W	-0.321306		YKL084W	-0.247839		YOL154W	-0.388856
YLR020C	-0.325787		YEL066W	-0.322623		YNL252C	-0.247875		YKR009C	-0.39001
YGR278W	-0.326455		YLR149C	-0.323492		YJL217W	-0.248094		YOR087W	-0.390518
YDL115C	-0.327379		YLL050C	-0.325752		YKR002W	-0.249339		YPL159C	-0.390662
YEL012W	-0.329482		YHL024W	-0.326468		YBR120C	-0.250982		YKL152C	-0.390752
YML079W	-0.331505		YDR384C	-0.327894		YGL142C	-0.25154		YIL105C	-0.391397
YDR123C	-0.332226		YHR057C	-0.328931		YDR503C	-0.252056		YHR027C	-0.397948
YKL219W	-0.334104		YKL084W	-0.329897		YLR284C	-0.255321		YJL082W	-0.400555
YDR248C	-0.334382		YDR463W	-0.333556		YDL197C	-0.255935		YMR226C	-0.401836
YLR284C	-0.334492		YOR025W	-0.335655		YMR204C	-0.25677		YPL113C	-0.402083
YJL180C	-0.335263		YDR352W	-0.336433		YBR010W	-0.256985		YGL257C	-0.405723
YGL047W	-0.335363		YLR174W	-0.338372		YIL057C	-0.261201		YKL128C	-0.406169
YAL054C	-0.336625		YCR097W	-0.339417		YDR153C	-0.261852		YFR049W	-0.407164
YGL080W	-0.343625		YOR321W	-0.340194		YMR280C	-0.261937		YLL050C	-0.407164
YFR055W	-0.349834		YBR138C	-0.341315		YDR424C	-0.262035		YOR357C	-0.409205
YDL027C	-0.350337		YKL168C	-0.341983		YPL201C	-0.263037		YOR111W	-0.409607
YKL217W	-0.351312		YIL105C	-0.344242		YDR100W	-0.263623		YEL038W	-0.410386
YOL100W	-0.352191		YER027C	-0.345718		YOR215C	-0.264716		YJR034W	-0.412072
YDR459C	-0.353405		YDR057W	-0.346789		YPR100W	-0.266208		YOR120W	-0.414159
YDR057W	-0.353751		YPR086W	-0.349049		YDR099W	-0.26626		YOR025W	-0.414189
YOR067C	-0.355246		YDR055W	-0.349946		YOL100W	-0.271157		YER052C	-0.41676
YJR034W	-0.356594		YBR107C	-0.35109		YER048W-A	-0.272301		YNL122C	-0.418044
YMR298W	-0.357852		YBR043C	-0.351465		YLL009C	-0.273693		YLR300W	-0.421603
YGL236C	-0.360854		YGR047C	-0.351929		YMR137C	-0.274147		YNL106C	-0.423675
YLR152C	-0.361116		YGR243W	-0.359064		YBR225W	-0.274276		YHR038W	-0.424518
YBL005W	-0.36548		YCR091W	-0.359194		YFR049W	-0.27758		YML131W	-0.429014
YPL014W	-0.366069		YNL101W	-0.360045		YNL012W	-0.279772		YOL151W	-0.430242
YCR091W	-0.370221		YMR166C	-0.360097		YAL055W	-0.282218		YER158C	-0.43047
YGR189C	-0.372846		YOR286W	-0.360506		YOR209C	-0.282232		YKL219W	-0.432275
YLR167W	-0.373317		YLL019C	-0.365702		YPL092W	-0.283037		YPL061W	-0.433944
YNL250W	-0.373919		YJR133W	-0.366909		YJL059W	-0.283302		YDL170W	-0.435113
YKL068W-A	-0.374977		YLR390W	-0.368044		YNL032W	-0.285611		YML123C	-0.435796
YDL107W	-0.377201		YEL012W	-0.369088		YLL007C	-0.292108		YAL041W	-0.436003
YHR137W	-0.377325		YOL084W	-0.369812		YMR028W	-0.297047		YGL205W	-0.437369
YPL201C	-0.37894		YDR079W	-0.370403		YGL086W	-0.297098		YAL039C	-0.442179
YGR161C	-0.383604		YIL087C	-0.372053		YBR269C	-0.297481		YNL280C	-0.442961
YEL020W-A	-0.385423		YDR173C	-0.372298		YOL087C	-0.298191		YDR304C	-0.44469
YBR042C	-0.385891		YMR243C	-0.372881		YJL181W	-0.298261		YLR284C	-0.449838
YPL177C	-0.388482		YDR090C	-0.373365		YGL162W	-0.299985		YOR321W	-0.451179
YLR016C	-0.388694		YNL012W	-0.374747		YDR536W	-0.300317		YOL122C	-0.45368
YNR039C	-0.391849		YJL062W-A	-0.375107		YGL080W	-0.301338		YNL093W	-0.454399
YPR005C	-0.396023		YPL088W	-0.376117		YCR010C	-0.30388		YHR063C	-0.454411
YPL202C	-0.399171		YDL215C	-0.376361		YOR357C	-0.305942		YGR154C	-0.454631
YIL044C	-0.399528		YBR185C	-0.379549		YDR132C	-0.306931		YOR299W	-0.456133
YGR289C	-0.399889		YDR357C	-0.3829		YGR143W	-0.307335		YCR083W	-0.456626
YIR011C	-0.402403		YER144C	-0.387424		YGR153W	-0.308179		YNL094W	-0.459585
YBR233W-A	-0.402532		YFR025C	-0.388305		YPR017C	-0.308279		YER144C	-0.460499
YGL009C	-0.403111		YDR035W	-0.38965		YLR082C	-0.309364		YLR260W	-0.465382
YDR181C	-0.405772		YFR050C	-0.391036		YCR005C	-0.309477		YCR009C	-0.466356
YIL055C	-0.406615		YDR151C	-0.396196		YDL006W	-0.310059		YFL010C	-0.466616
YOR079C	-0.407976		YGR154C	-0.397055		YBR148W	-0.311122		YDL214C	-0.468877
YIR039C	-0.410371		YBR230W-A	-0.399771		YDL049C	-0.311213		YJL056C	-0.469615
YKL053C-A	-0.411092		YCR004C	-0.400425		YDR019C	-0.311786		YNR030W	-0.471831
YGR152C	-0.413699		YGR189C	-0.402572		YGL205W	-0.312551		YMR322C	-0.473928
YML100W	-0.413921		YDR100W	-0.403513		YKL100C	-0.315177		YBR290W	-0.475585
YGR194C	-0.414258		YPR075C	-0.404138		YML100W	-0.315292		YPR037C	-0.475733
YGR238C	-0.414936		YAL054C	-0.405083		YBR033W	-0.31558		YLR392C	-0.476161
YJR046W	-0.418469		YFR004W	-0.406119		YKR067W	-0.316451		YPL186C	-0.478305
YMR091C	-0.41879		YPL177C	-0.406862		YMR009W	-0.317112		YNL173C	-0.479869
YGR016W	-0.418886		YHR164C	-0.414225		YIL046W-A	-0.318284		YBR225W	-0.488401
YDR380W	-0.426543		YOL038W	-0.41522		YKR068C	-0.318869		YPL206C	-0.492035
YGR058W	-0.429466		YKL219W	-0.416955		YOR299W	-0.319727		YER093C-A	-0.492706
YPL199C	-0.43095		YDR519W	-0.423186		YHR071W	-0.320048		YBR033W	-0.494277
YGL087C	-0.433195		YOR113W	-0.425094		YDR513W	-0.320118		YDR034W-B	-0.498404
YOR215C	-0.434483		YGR076C	-0.42909		YGR040W	-0.321218		YNL297C	-0.506044
YOR129C	-0.435662		YHL009C	-0.430258		YCR009C	-0.323626		YML128C	-0.508983
YLR174W	-0.436508		YMR178W	-0.430265		YPR155C	-0.324782		YKL175W	-0.510482
YPR065W	-0.440146		YDR178W	-0.433579		YNR010W	-0.327109		YCR091W	-0.512581
YOR276W	-0.440523		YGL047W	-0.435137		YER024W	-0.327996		YBR157C	-0.513181
YKL091C	-0.453321		YDR512C	-0.435305		YLR283W	-0.328819		YAL055W	-0.518621
YHR199C-A	-0.454288		YER139C	-0.438817		YHR132W-A	-0.328875		YNL251C	-0.520486
YBR107C	-0.459242		YNL255C	-0.439461		YKL062W	-0.329375		YKL170W	-0.522884
YPR094W	-0.466087		YAL041W	-0.439643		YNL202W	-0.329618		YOL143C	-0.524229
YPL200W	-0.470695		YLR273C	-0.440164		YDR085C	-0.332322		YKL107W	-0.525022
YIL136W	-0.478224		YDL113C	-0.442865		YHR199C-A	-0.335524		YDR158W	-0.526921
YKR002W	-0.478332		YDR256C	-0.447167		YIL121W	-0.336023		YDR099W	-0.530767
YLR004C	-0.481498		YHR011W	-0.450026		YOL023W	-0.341403		YNL253W	-0.531895
YOL089C	-0.484237		YFL010C	-0.451888		YKL168C	-0.34219		YGR161C	-0.533962
YDR538W	-0.48488		YGR020C	-0.45197		YLR250W	-0.344106		YMR030W	-0.533962
YPR184W	-0.487181		YKL062W	-0.457334		YLR307W	-0.344688		YKL053C-A	-0.536623
YER149C	-0.487469		YBL008W-A	-0.458216		YOR031W	-0.344787		YLR053C	-0.536973
YER065C	-0.493629		YGL236C	-0.460259		YDL142C	-0.346342		YOR374W	-0.538332
YLR283W	-0.494083		YKR066C	-0.462548		YJR118C	-0.346631		YIL033C	-0.54049
YOL128C	-0.496294		YMR105C	-0.464945		YBR037C	-0.350345		YFR025C	-0.540775
YER173W	-0.500738		YHR049W	-0.465097		YPL060W	-0.351012		YPR155C	-0.542198
YNL260C	-0.501216		YDL181W	-0.467603		YKR049C	-0.351262		YDL107W	-0.542572
YLL055W	-0.505572		YCR009C	-0.475024		YDR151C	-0.356796		YLR152C	-0.547713
YAL055W	-0.507236		YFL028C	-0.475649		YKL170W	-0.357048		YIL013C	-0.547755
YPL092W	-0.508427		YIL053W	-0.475654		YJL171C	-0.357375		YBR037C	-0.551902
YNR010W	-0.51297		YOR177C	-0.47765		YBL080C	-0.36008		YDL142C	-0.553694
YDL200C	-0.517581		YBR137W	-0.479739		YGL009C	-0.364568		YER040W	-0.55431
YDR512C	-0.518395		YLR284C	-0.481337		YDR181C	-0.364719		YPL015C	-0.555237
YKL170W	-0.518686		YHR132W-A	-0.486385		YHR126C	-0.367262		YDR248C	-0.559303
YDL006W	-0.520447		YDL049C	-0.487981		YAL017W	-0.371156		YDR519W	-0.561415
YLL060C	-0.527481		YBR069C	-0.488748		YBR098W	-0.371296		YNL026W	-0.562535
YPL159C	-0.529329		YMR298W	-0.49078		YBR230W-A	-0.371556		YBL080C	-0.567047
YDR151C	-0.529618		YJR095W	-0.491665		YER168C	-0.372271		YDR085C	-0.567374
YNL130C-A	-0.532497		YMR175W	-0.493294		YML068W	-0.37736		YMR195W	-0.573134
YHR124W	-0.534238		YGL142C	-0.498266		YKL008C	-0.378602		YDR255C	-0.573676
YOL133W	-0.534948		YMR030W	-0.499084		YGR080W	-0.379674		YGL087C	-0.579011
YDR259C	-0.541394		YAL039C	-0.50957		YDL115C	-0.38019		YAL005C	-0.589994
YGL256W	-0.543235		YDL085W	-0.50959		YOL073C	-0.382734		YDL007W	-0.590586
YKL218C	-0.544404		YDL142C	-0.512027		YNL250W	-0.391198		YOR230W	-0.600307
YHL009C	-0.547896		YOR285W	-0.521246		YGR238C	-0.398742		YGL026C	-0.601495
YIR032C	-0.548643		YJR141W	-0.52227		YKL217W	-0.402135		YNL255C	-0.602499
YCR083W	-0.548697		YPL206C	-0.527998		YNL304W	-0.402264		YHR008C	-0.612653
YLR082C	-0.549782		YPL202C	-0.529773		YAL005C	-0.405256		YDR518W	-0.614708
YPL123C	-0.559491		YBL080C	-0.532647		YOL126C	-0.408924		YEL057C	-0.615975
YML107C	-0.559998		YIL136W	-0.533654		YKL072W	-0.412345		YJR019C	-0.618412
YOR120W	-0.561462		YMR095C	-0.534206		YOR025W	-0.412852		YJR148W	-0.620259
YGR153W	-0.562931		YKL170W	-0.535239		YPL147W	-0.417407		YDL085W	-0.625006
YIL144W	-0.571298		YIR032C	-0.535824		YOL133W	-0.421902		YER015W	-0.62936
YEL017C-A	-0.575256		YNL223W	-0.537628		YPL067C	-0.422016		YPR003C	-0.630947
YJL181W	-0.581803		YGR168C	-0.537766		YKL107W	-0.423066		YDR129C	-0.632094
YDL130W-A	-0.589801		YJL066C	-0.543046		YOR113W	-0.424076		YJL042W	-0.634262
YPL196W	-0.589892		YLR377C	-0.545475		YMR322C	-0.430203		YFR004W	-0.637141
YMR178W	-0.592022		YDR041W	-0.550274		YFR024C-A	-0.430863		YPL191C	-0.641389
YPR017C	-0.593974		YER024W	-0.550559		YHL024W	-0.43135		YKR065C	-0.641405
YJL059W	-0.605665		YKL053C-A	-0.550978		YOL107W	-0.444645		YGR174W-A	-0.643554
YGL250W	-0.608163		YKR088C	-0.552496		YJL103C	-0.44487		YJR122W	-0.645632
YHR049W	-0.608192		YBR287W	-0.552987		YPL196W	-0.44739		YHR176W	-0.64766
YLR233C	-0.616279		YLR258W	-0.553232		YJL170C	-0.453596		YKR049C	-0.649082
YGR067C	-0.619995		YLR225C	-0.555076		YPL191C	-0.458612		YGL146C	-0.649144
YGL146C	-0.62292		YER052C	-0.556271		YKL091C	-0.46303		YOR291W	-0.650681
YBL080C	-0.62467		YDR034W-B	-0.559203		YDR533C	-0.466176		YDR100W	-0.661733
YNL252C	-0.625676		YER062C	-0.55982		YER139C	-0.469508		YDR492W	-0.662169
YER180C	-0.626506		YER058W	-0.560662		YKR005C	-0.47194		YIL056W	-0.666858
YKR005C	-0.627833		YOR120W	-0.561092		YPR075C	-0.474044		YGR238C	-0.671742
YMR105C	-0.629707		YBR157C	-0.5617		YOR120W	-0.475755		YIL101C	-0.677488
YOL107W	-0.632764		YMR226C	-0.563425		YGR230W	-0.476737		YFR044C	-0.681141
YIL101C	-0.650199		YOR164C	-0.56468		YKL195W	-0.478634		YGL010W	-0.68552
YMR137C	-0.653524		YER130C	-0.565225		YIL116W	-0.486683		YBR137W	-0.687319
YNL035C	-0.656085		YKL091C	-0.574104		YML054C	-0.49028		YNL037C	-0.689186
YOR077W	-0.656312		YLR250W	-0.574963		YBR287W	-0.49094		YIL055C	-0.691861
YML128C	-0.659475		YKL218C	-0.575063		YPL088W	-0.49291		YNL223W	-0.692295
YDR513W	-0.660078		YNL093W	-0.578044		YLL001W	-0.496909		YHR011W	-0.69524
YIL160C	-0.661764		YIL046W-A	-0.578509		YDR357C	-0.49866		YGR232W	-0.69535
YDR173C	-0.666839		YGL257C	-0.57906		YOR285W	-0.501334		YCR012W	-0.707829
YEL057C	-0.670247		YGR238C	-0.579385		YDR018C	-0.501744		YLR390W	-0.71028
YFR032C-A	-0.671693		YBR230C	-0.580818		YDL027C	-0.502086		YDR018C	-0.711667
YPL060W	-0.672283		YNL173C	-0.581387		YDR126W	-0.503155		YOL133W	-0.713414
YGR076C	-0.678983		YOR291W	-0.58309		YNR001C	-0.505047		YLL009C	-0.716508
YJL058C	-0.681675		YBR037C	-0.588657		YFR013W	-0.50751		YLR154W-E	-0.717544
YDR318W	-0.682107		YKR005C	-0.590227		YCR097W	-0.509178		YDR533C	-0.718648
YOR047C	-0.684897		YDR424C	-0.602912		YIL105C	-0.515811		YML092C	-0.718669
YOR173W	-0.686704		YBR105C	-0.603434		YDR482C	-0.516446		YOL073C	-0.720846
YIL172C	-0.68765		YGL242C	-0.603643		YNL098C	-0.523062		YDR155C	-0.724932
YER058W	-0.688178		YPL060W	-0.607072		YLR225C	-0.524069		YER035W	-0.731557
YOL101C	-0.693856		YBL064C	-0.610395		YJL066C	-0.524473		YBR269C	-0.732749
YOR279C	-0.695206		YOR357C	-0.612245		YPL061W	-0.534266		YJL196C	-0.735472
YPL186C	-0.695689		YGR143W	-0.612606		YPL200W	-0.536423		YPL104W	-0.73738
YGL162W	-0.699664		YNL254C	-0.612815		YGL181W	-0.538257		YJL034W	-0.74225
YIL013C	-0.706249		YNL122C	-0.613048		YGR154C	-0.541069		YLR250W	-0.744361
YLR205C	-0.708987		YDR511W	-0.613878		YDR318W	-0.541215		YNL254C	-0.746297
YKL072W	-0.714465		YGR021W	-0.614577		YPR005C	-0.557088		YBR043C	-0.749609
YDR424C	-0.71459		YOR047C	-0.619599		YBR275C	-0.559037		YBR230C	-0.750415
YBR148W	-0.716791		YGR194C	-0.621336		YGR016W	-0.567101		YFL033C	-0.759177
YJL170C	-0.73006		YPR094W	-0.630736		YMR303C	-0.570176		YNR039C	-0.760583
YBR208C	-0.745031		YLR208W	-0.631785		YIL013C	-0.573305		YAL017W	-0.77936
YER139C	-0.75821		YPR003C	-0.632484		YMR152W	-0.577609		YOL107W	-0.793303
YLR164W	-0.761316		YHR199C-A	-0.636209		YPL018W	-0.579038		YGL181W	-0.794944
YBR120C	-0.771778		YJR034W	-0.638682		YLR164W	-0.581254		YDR041W	-0.799199
YHR092C	-0.77508		YLR270W	-0.642145		YJL037W	-0.591165		YDR009W	-0.80062
YJL214W	-0.786736		YGL010W	-0.646425		YER015W	-0.591644		YLR179C	-0.801385
YGR138C	-0.798818		YOR173W	-0.650995		YLR258W	-0.592771		YPL166W	-0.801872
YDL154W	-0.804502		YBL057C	-0.65128		YLR315W	-0.594207		YDR513W	-0.810028
YBR299W	-0.807804		YML128C	-0.651765		YDL107W	-0.598834		YBR056W-A	-0.810082
YMR095C	-0.811411		YKL187C	-0.654694		YGL090W	-0.603274		YIL172C	-0.812876
YHR116W	-0.815347		YDR304C	-0.65541		YBR050C	-0.604083		YEL020W-A	-0.820814
YDR317W	-0.834466		YIL010W	-0.660378		YCR091W	-0.610678		YDL237W	-0.824844
YHR202W	-0.840527		YGR230W	-0.670835		YIL172C	-0.619956		YFL030W	-0.829859
YBR138C	-0.852794		YIL121W	-0.671514		YCL056C	-0.623306		YFL031W	-0.835783
YLR393W	-0.865369		YPL067C	-0.672835		YIL117C	-0.62782		YOL038W	-0.840642
YBR157C	-0.870251		YKR058W	-0.674749		YGL146C	-0.629363		YKL100C	-0.843401
YBR098W	-0.871893		YKL195W	-0.683169		YGL010W	-0.639159		YNL217W	-0.848432
YGR230W	-0.883752		YOL151W	-0.68779		YIL144W	-0.641148		YIL155C	-0.852037
YIL117C	-0.886387		YER040W	-0.69081		YBR157C	-0.642296		YFR050C	-0.852368
YBR054W	-0.893086		YGR232W	-0.690874		YLL055W	-0.646305		YGR230W	-0.856242
YGL010W	-0.898098		YHR087W	-0.694022		YLR392C	-0.647115		YKL165C	-0.864608
YPL088W	-0.900745		YDR033W	-0.694553		YKL218C	-0.650333		YBL064C	-0.866411
YCR097W	-0.913231		YDL130W-A	-0.695634		YER058W	-0.658445		YIL087C	-0.883425
YML042W	-0.931725		YJL194W	-0.702371		YOR137C	-0.666017		YKL168C	-0.884088
YKR058W	-0.93318		YEL020W-A	-0.715851		YGL250W	-0.666144		YLR149C	-0.886213
YDL085W	-0.93592		YOL133W	-0.719362		YMR095C	-0.666734		YDR512C	-0.889828
YOR338W	-0.948074		YGR234W	-0.719385		YHL016C	-0.680149		YNL098C	-0.889934
YLL009C	-0.949986		YGL250W	-0.727378		YDR034W-B	-0.692957		YGR080W	-0.890128
YGL090W	-0.955808		YDR255C	-0.734273		YJL058C	-0.695076		YOL128C	-0.89216
YER024W	-0.966995		YER001W	-0.738127		YMR232W	-0.706826		YBR230W-A	-0.893618
YMR175W	-0.967767		YGR174C	-0.739615		YGR225W	-0.706864		YCR004C	-0.902078
YLR273C	-0.970735		YML100W	-0.740775		YEL057C	-0.710693		YNL274C	-0.907434
YGR174C	-0.980886		YPL186C	-0.748011		YLR377C	-0.713545		YJL171C	-0.914495
YJL144W	-0.985621		YKL100C	-0.758852		YGR194C	-0.721174		YPL250C	-0.920601
YER054C	-0.995192		YKR065C	-0.761424		YDR317W	-0.723811		YHR199C-A	-0.936573
YHL016C	-0.99798		YPL250C	-0.769372		YLR307C-A	-0.726497		YOR113W	-0.939079
YDR357C	-1.00236		YDR528W	-0.770756		YMR178W	-0.727497		YEL012W	-0.942291
YIL161W	-1.04141		YLL009C	-0.779385		YEL071W	-0.731463		YLR273C	-0.960508
YMR232W	-1.04406		YNL026W	-0.784679		YLR270W	-0.734956		YIL010W	-0.961278
YGL154C	-1.04766		YBR208C	-0.786334		YKR080W	-0.74513		YDR059C	-0.966433
YGR174W-A	-1.04824		YJR073C	-0.794969		YJR046W	-0.747743		YJL005W	-0.967327
YNL142W	-1.06821		YMR315W	-0.795253		YGL047W	-0.753945		YIL116W	-0.97307
YMR030W	-1.0742		YPR184W	-0.803122		YBL039W-A	-0.786551		YDL123W	-0.979568
YOR306C	-1.0818		YOL107W	-0.805509		YER035W	-0.802764		YDL130W-A	-0.991395
YOR388C	-1.08563		YPL123C	-0.80566		YER054C	-0.80751		YBR287W	-0.994171
YDR034W-B	-1.08711		YNL098C	-0.808848		YDR173C	-0.813021		YMR105C	-0.997661
YDR179W-A	-1.08719		YHR137W	-0.815429		YOR177C	-0.814278		YJR073C	-0.998623
YGR168C	-1.09189		YPL018W	-0.81647		YMR030W	-0.816987		YKR058W	-1.01766
YLR307C-A	-1.12211		YPL191C	-0.830092		YGR161C	-0.821026		YLL019C	-1.03357
YFL052W	-1.15228		YDR155C	-0.834428		YPL123C	-0.821458		YHR071W	-1.05039
YGR154C	-1.15958		YER065C	-0.841539		YBR138C	-0.826857		YDR511W	-1.05561
YNL012W	-1.16071		YKR049C	-0.857673		YKL163W	-0.839498		YDR035W	-1.06838
YPL067C	-1.16652		YIL160C	-0.859638		YDL113C	-0.846142		YHR037W	-1.0756
YPL191C	-1.17605		YOL052C-A	-0.861192		YGR289C	-0.846466		YIR039C	-1.08005
YBR050C	-1.17827		YDR126W	-0.866874		YLR152C	-0.851606		YKL091C	-1.08177
YNL254C	-1.17917		YMR195W	-0.884212		YIL124W	-0.854471		YKL195W	-1.0831
YCL056C	-1.18728		YDR059C	-0.886414		YIL136W	-0.877915		YIL124W	-1.09226
YPL166W	-1.20742		YGL087C	-0.896941		YIL101C	-0.895636		YMR315W	-1.10075
YDR126W	-1.22084		YIL101C	-0.90464		YMR206W	-0.896795		YOL087C	-1.10276
YJR141W	-1.23113		YBR054W	-0.906598		YEL012W	-0.906382		YLR164W	-1.11823
YCR010C	-1.33165		YDR403W	-0.908462		YFL052W	-0.913284		YMR152W	-1.13062
YLR121C	-1.36182		YER054C	-0.90857		YMR105C	-0.923266		YOR215C	-1.13075
YBL039W-A	-1.36292		YGR067C	-0.914893		YGL154C	-0.939635		YLR258W	-1.14847
YNL223W	-1.36644		YOL154W	-0.922141		YBR183W	-0.948502		YOR285W	-1.15663
YDR345C	-1.36685		YOR215C	-0.932009		YNR002C	-0.953255		YGR143W	-1.16389
YHR071W	-1.38097		YLR164W	-0.936263		YAR009C	-0.99024		YML100W	-1.20811
YOR177C	-1.3931		YPL166W	-0.951121		YPL113C	-1.01259		YJL066C	-1.22267
YLR053C	-1.41932		YLR315W	-0.97012		YDR403W	-1.03793		YGL047W	-1.27918
YDR255C	-1.43958		YBR269C	-0.975283		YOR173W	-1.04178		YDL027C	-1.29826
YKL107W	-1.45152		YHR037W	-0.978216		YDL079C	-1.07728		YGL250W	-1.30474
YMR195W	-1.48081		YDL170W	-0.999104		YPL166W	-1.08136		YHR208W	-1.36962
YGR225W	-1.50734		YDL027C	-1.00148		YPL186C	-1.08306		YDL113C	-1.37193
YNL093W	-1.52818		YPL092W	-1.01635		YKR058W	-1.10939		YKR067W	-1.38919
YOL152W	-1.58395		YHR116W	-1.03861		YDR342C	-1.13037		YOR137C	-1.39608
YPL018W	-1.59983		YCR083W	-1.07967		YDR255C	-1.13762		YGL009C	-1.40559
YOL136C	-1.62644		YMR152W	-1.09964		YNL223W	-1.14776		YPL123C	-1.45518
YLR315W	-1.63288		YLR154W-E	-1.09978		YLR154W-E	-1.22068		YIL121W	-1.4701
YOL154W	-1.64518		YGL125W	-1.1153		YLR053C	-1.24191		YPL058C	-1.48963
YBL008W-A	-1.6507		YHR071W	-1.11612		YGR174W-A	-1.26613		YOR173W	-1.51863
YMR322C	-1.65394		YML042W	-1.13803		YNL093W	-1.27375		YBL039W-A	-1.53238
YDR403W	-1.81983		YDR513W	-1.18608		YLR149C	-1.29868		YGR194C	-1.54375
YHR087W	-1.83831		YKL068W-A	-1.19201		YBR068C	-1.31756		YFR024C-A	-1.58213
YIL046W-A	-1.88714		YGL009C	-1.21871		YPR030W	-1.40023		YLR270W	-1.60069
YLR013W	-1.91577		YOL136C	-1.23048		YHR087W	-1.44567		YKL120W	-1.6024
YJL037W	-1.97678		YPR156C	-1.24352		YGR243W	-2.02159		YER058W	-1.62724
YHR126C	-2.04288		YEL017C-A	-1.25409		YML123C	-2.4669		YAR009C	-1.64202
YML123C	-2.26568		YCR010C	-1.33962		YJL144W	-2.57808		YKL218C	-1.81068
YLR154W-E	-2.41748		YBL039W-A	-1.42333		YLR205C	-2.66916		YLR205C	-2.03823
YCR021C	-2.81861		YNL142W	-1.63711		YCR021C	-3.1494		YBR068C	-2.21386
YBR043C	-4.69293		YBL005W	-4.65647		YBR043C	-5.36975		YBL005W	-4.33005

## Sheet: significant TFs
ORF	C vs N	climqdr-FC	climpdr-FC	nlimqdr-FC	nlimpdr-FC
YCR097W	0.0392248	-0.913231	-0.339417	-0.509178	-0.176541		Hmra1	Silenced copy of a1 at HMR
YDL170W	0.00951065	-0.216101	-0.999104	-0.209677	-0.435113		Uga3	Transcriptional activator for GABA-dependent induction of GABA genes
YDR034C	0.00704274	-0.03088	-0.06993	-0.156471	-0.11318		Lys14	Transcriptional activator involved in regulating lysine biosynthesis
YDR123C	0.0406902	-0.332226	-0.142393	0.159466	0.271868		Ino2	Component of the heteromeric Ino2p/Ino4p basic helix-loop-helix transcription activator that binds inositol/choline-responsive elements (ICREs), required for derepression of phospholipid biosynthetic genes in response to inositol depletion
YDR259C	0.028183	-0.541394	0.149317	0.336515	0.147609		Yap6	Basic leucine zipper (bZIP) transcription factor
YDR463W	0.0301924	-0.30846	-0.333556	-0.110832	0.132859		Stp1	Transcription factor, undergoes proteolytic processing by SPS (Ssy1p-Ptr3p-Ssy5p)-sensor component Ssy5p in response to extracellular amino acids; activates transcription of amino acid permease genes and may have a role in tRNA processing
YER040W	0.0307616	-0.037366	-0.69081	-0.214439	-0.55431		Gln3	Transcriptional activator of genes regulated by NCR
YFL031W	0.0247702	1.52794	-0.055697	-0.010243	-0.835783		Hac1	Transcription factor that regulates the unfolded protein response
YGL162W	0.0453335	-0.699664	-0.276749	-0.299985	-0.239656		Sut1	Transcription factor of the Zn[II]2Cys6 family involved in sterol uptake; involved in induction of hypoxic gene expression
YHR124W	0.0474766	-0.534238	-0.203114	-0.05109	-0.142739		Ndt80	Meiosis-specific transcription factor required for exit from pachytene and for full meiotic recombination; activates middle sporulation genes; competes with Sum1p for binding to promoters containing middle sporulation elements (MSE)
YHR206W	0.0337095	0.280771	-0.012322	0.229933	0.446495		Skn7	Nuclear response regulator and transcription factor
YIL101C	0.00810444	-0.650199	-0.90464	-0.895636	-0.677488		Xbp1	Transcriptional repressor that binds to promoter sequences of the cyclin genes, CYS3, and SMF2; expression is induced by stress or starvation during mitosis, and late in meiosis; member of the Swi4p/Mbp1p family; potential Cdc28p substrate
YIR033W	0.00454445	0.241723	-0.177852	0.073162	-0.107102		Mga2	ER membrane protein involved in regulation of OLE1 transcription
YJL056C	0.00142562	0.509787	-0.244639	0.165197	-0.469615		Zap1	Zinc-regulated transcription factor; binds to zinc-responsive promoters to induce transcription of certain genes in presence of zinc, represses other genes in low zinc; regulates its own transcription; contains seven zinc-finger domains
YJL103C	0.0124072	0.090347	0.003969	-0.44487	-0.333182		Gsm1	Putative zinc cluster protein of unknown function
YJL110C	0.0176645	0.35818	0.276244	0.193517	0.040899		Gzf3	Transcription factor that regulates nitrogen catabolic gene expression
YKL062W	0.0386878	-0.20574	-0.457334	-0.329375	0.08067		Msn4	Transcriptional activator related to Msn2p; activated in stress conditions, which results in translocation from the cytoplasm to the nucleus; binds DNA at stress response elements of responsive genes, inducing gene expression
YKL112W	0.0417047	0.76349	0.40881	0.503515	-0.050615		Abf1	DNA binding protein with possible chromatin-reorganizing activity
YLR013W	0.0425445	-1.91577	-0.321306	0.026542	-0.128655		Gat3	Protein containing GATA family zinc finger motifs
YLR223C	0.0248054	0.205742	0.417595	0.732706	0.843703		Ifh1	Coactivator that regulates transcription of ribosomal protein genes
YLR375W	0.0289358	0.772822	0.786481	0.346696	-0.004201		Stp3	Zinc-finger protein of unknown function
YML007W	0.0438385	0.086688	-0.116631	-0.102281	-0.346267		Yap1	Basic leucine zipper (bZIP) transcription factor required for oxidative stress tolerance; activated by H2O2 through the multistep formation of disulfide bonds and transit from the cytoplasm to the nucleus; mediates resistance to cadmium
YMR042W	0.0225976	-0.251532	-0.060638	0.107235	-0.149618		Arg80	ranscription factor involved in regulation of arginine-responsive genes; acts with Arg81p and Arg82p
YMR043W	0.0350754	0.688273	0.129774	-0.097814	0.096011		Mcm1	Transcription factor involved in both repression and activation
YMR280C	0.0190938	0.42038	0.067327	-0.261937	-0.201604		Cat8	Zinc cluster transcriptional activator necessary for derepression of a variety of genes under non-fermentative growth conditions, active after diauxic shift, binds carbon source responsive elements
YNL255C	0.0369758	0.627454	-0.439461	0.224717	-0.602499		Gis2	Translational activator for mRNAs with internal ribosome entry sites; associates with polysomes and binds to a specific subset of mRNAs; ortholog of human ZNF9/CNBP, a gene involved in myotonic dystrophy type 2
YOL089C	0.0431615	-0.484237	-0.011135	-0.127809	-0.379301		Hal9	Putative transcription factor containing a zinc finger; overexpression increases salt tolerance through increased expression of the ENA1 (Na+/Li+ extrusion pump) gene while gene disruption decreases both salt tolerance and ENA1 expression
YPL089C	0.0211519	0.351882	-0.129452	0.214883	0.211073		Rlm1	MADS-box transcription factor, component of the protein kinase C-mediated MAP kinase pathway involved in the maintenance of cell integrity; phosphorylated and activated by the MAP-kinase Slt2p
YPL133C	0.0375541	0.031143	0.426786	-0.067085	0.528901		Rds2	Transcription factor involved in regulating gluconeogenesis
YPL177C	0.0121499	-0.388482	-0.406862	-0.030772	-0.299401		Cup9	Homeodomain-containing transcriptional repressor of PTR2
YPL202C	0.0465455	-0.399171	-0.529773	-0.114724	0.330711		Aft2	Iron-regulated transcriptional activator; activates genes involved in intracellular iron use and required for iron homeostasis and resistance to oxidative stress; similar to Aft1p
YPR065W	0.031923	-0.440146	0.164312	0.374067	0.33126		Rox1	Heme-dependent repressor of hypoxic genes; contains an HMG domain that is responsible for DNA bending activity
ORF	qdr vs pdr	climqdr-FC	climpdr-FC	nlimqdr-FC	nlimpdr-FC
YBL005W	0.00166913	-0.36548	-4.65647	-0.061502	-4.33005		Pdr3	Transcriptional activator of the pleiotropic drug resistance network, regulates expression of ATP-binding cassette (ABC) transporters through binding to cis-acting sites known as PDREs (PDR responsive elements); post-translationally up-regulated in cells lacking a functional mitochondrial genome
YGL181W	0.039634	0.143289	-0.147528	-0.538257	-0.794944		Gts1	Protein involved in Arf3p regulation and in transcription regulation; localizes to the nucleus and to endocytic patches; contains an N-terminal Zn-finger and ArfGAP homology domain, a C-terminal glutamine-rich region, and a UBA (ubiquitin associated) domain; gts1 mutations affect budding, cell size, heat tolerance, sporulation, life span, ultradian rhythms, endocytosis; expression oscillates in a…
YHL009C	0.0375718	-0.547896	-0.430258	0.213336	0.317848		Yap3	Basic leucine zipper (bZIP) transcription factor (1)
YMR070W	0.0342489	0.226459	-0.025233	0.607156	0.326814		Mot3	Transcriptional repressor and activator with two C2-H2 zinc fingers; involved in repression of a subset of hypoxic genes by Rox1p, repression of several DAN/TIR genes during aerobic growth, and repression of ergosterol biosynthetic genes in response to hyperosmotic stress; contributes to recruitment of the Tup1p-Cyc8p general repressor to promoters; involved in positive transcriptional regulation…
YOR077W	0.0415095	-0.656312	-0.14053	0.071461	0.524015		Rts2	Basic zinc-finger protein, similar to human and mouse Kin17 proteins which are chromatin-associated proteins involved in UV response and DNA replication
YOR113W	0.00438926	0.082856	-0.425094	-0.424076	-0.939079		Azf1	Zinc-finger transcription factor, involved in induction of CLN3 transcription in response to glucose; genetic and physical interactions indicate a possible role in mitochondrial transcription or genome maintenance
YPR094W	0.049985	-0.466087	-0.630736	0.264782	0.072012		Rds3	Component of the SF3b subcomplex of the U2 snRNP, zinc cluster protein involved in pre-mRNA splicing and cycloheximide resistance

## Sheet: GO-enrichments
climqdr-up
Biological Process
GO Term	Aspect	P-value	Sample frequency	Background frequency	Genes
GO:0044281 small molecule metabolic process	P	0.0318	34/95 (35.8%)	175/932 (18.8%)	ICL2 IMD4 YAT1 MDH2 SPS19 ERC1 GLY1 CYR1 SHM2 DUG1 RIB4 FAA4 BAT2 YBT1 UTR4 MCM1 DGK1 FCY1 URA7 YEH1 RNR4 FAA2 SAM1 TRP5 TES1 NTE1 MLS1 IDH1 POX1 HIS5 MAE1 GUT1 HOR2 ALD6
GO:0043436 oxoacid metabolic process	P	0.0334	24/95 (25.3%)	103/932 (11.1%)	ICL2 YAT1 MDH2 SPS19 ERC1 GLY1 SHM2 DUG1 FAA4 BAT2 UTR4 MCM1 DGK1 URA7 FAA2 SAM1 TRP5 TES1 MLS1 IDH1 POX1 HIS5 MAE1 ALD6
GO:0019752 carboxylic acid metabolic process	P	0.0334	24/95 (25.3%)	103/932 (11.1%)	ICL2 YAT1 MDH2 SPS19 ERC1 GLY1 SHM2 DUG1 FAA4 BAT2 UTR4 MCM1 DGK1 URA7 FAA2 SAM1 TRP5 TES1 MLS1 IDH1 POX1 HIS5 MAE1 ALD6
GO:0006082 organic acid metabolic process	P	0.0334	24/95 (25.3%)	103/932 (11.1%)	ICL2 YAT1 MDH2 SPS19 ERC1 GLY1 SHM2 DUG1 FAA4 BAT2 UTR4 MCM1 DGK1 URA7 FAA2 SAM1 TRP5 TES1 MLS1 IDH1 POX1 HIS5 MAE1 ALD6
climqdr-down
Biological Process
GO Term	Aspect	P-value	Sample frequency	Background frequency	Genes
GO:0048610 cellular process involved in reproduction	P	0.0217	20/133 (15.0%)	55/932 (5.9%)	FUS2 ADY2 ISC10 MPC54 AMA1 YOR338W SWF1 RMD5 RMR1 MSH5 DIT1 CTF19 BNS1 MCM21 MSC1 NKP2 YSW1 MMS4 SPO1 HMRA1
GO:0022414 reproductive process	P	0.0217	20/133 (15.0%)	55/932 (5.9%)	FUS2 ADY2 ISC10 MPC54 AMA1 YOR338W SWF1 RMD5 RMR1 MSH5 DIT1 CTF19 BNS1 MCM21 MSC1 NKP2 YSW1 MMS4 SPO1 HMRA1
GO:0007126 meiosis	P	0.0399	14/133 (10.5%)	32/932 (3.4%)	ADY2 ISC10 MPC54 AMA1 RMD5 RMR1 MSH5 CTF19 BNS1 MCM21 MSC1 NKP2 MMS4 SPO1
GO:0051327 M phase of meiotic cell cycle	P	0.0399	14/133 (10.5%)	32/932 (3.4%)	ADY2 ISC10 MPC54 AMA1 RMD5 RMR1 MSH5 CTF19 BNS1 MCM21 MSC1 NKP2 MMS4 SPO1
clim-pdr-up
Biological Process
GO Term	Aspect	P-value	Sample frequency	Background frequency	Genes
GO:0042254 ribosome biogenesis	P	4.75e-09	16/53 (30.2%)	37/932 (4.0%)	UTP13 FAF1 NOP53 TMA23 NUP2 SDA1 MOT1 NOP4 CBF5 ECM1 IPI3 MEX67 RSA4 RPF1 UTP11 RSA3
GO:0022613 ribonucleoprotein complex biogenesis	P	5.04e-08	16/53 (30.2%)	42/932 (4.5%)	UTP13 FAF1 NOP53 TMA23 NUP2 SDA1 MOT1 NOP4 CBF5 ECM1 IPI3 MEX67 RSA4 RPF1 UTP11 RSA3
GO:0071843 cellular component biogenesis at cellular level	P	1.28e-05	17/53 (32.1%)	66/932 (7.1%)	UTP13 FAF1 NOP53 TMA23 NUP2 SDA1 MOT1 NOP4 SMI1 CBF5 ECM1 IPI3 MEX67 RSA4 RPF1 UTP11 RSA3
GO:0042273 ribosomal large subunit biogenesis	P	0.00145	6/53 (11.3%)	9/932 (1.0%)	NOP53 SDA1 IPI3 RSA4 RPF1 RSA3
GO:0044085 cellular component biogenesis	P	0.00214	20/53 (37.7%)	123/932 (13.2%)	POM152 UTP13 FAF1 NOP53 TMA23 GIM3 NUP2 SDA1 MOT1 NOP4 SMI1 CBF5 ECM1 IPI3 MEX67 RSC6 RSA4 RPF1 UTP11 RSA3
GO:0006364 rRNA processing	P	0.00358	9/53 (17.0%)	26/932 (2.8%)	UTP13 FAF1 NOP53 MOT1 NOP4 CBF5 IPI3 RPF1 UTP11
GO:0000027 ribosomal large subunit assembly	P	0.00721	4/53 (7.5%)	4/932 (0.4%)	IPI3 RSA4 RPF1 RSA3
GO:0016072 rRNA metabolic process	P	0.00725	9/53 (17.0%)	28/932 (3.0%)	UTP13 FAF1 NOP53 MOT1 NOP4 CBF5 IPI3 RPF1 UTP11
GO:0071428 rRNA-containing ribonucleoprotein complex export from nucleus	P	0.00732	5/53 (9.4%)	7/932 (0.8%)	NOP53 SDA1 ECM1 MEX67 RPF1
GO:0033750 ribosome localization	P	0.00732	5/53 (9.4%)	7/932 (0.8%)	NOP53 SDA1 ECM1 MEX67 RPF1
GO:0071166 ribonucleoprotein complex localization	P	0.00732	5/53 (9.4%)	7/932 (0.8%)	NOP53 SDA1 ECM1 MEX67 RPF1
GO:0071426 ribonucleoprotein complex export from nucleus	P	0.00732	5/53 (9.4%)	7/932 (0.8%)	NOP53 SDA1 ECM1 MEX67 RPF1
GO:0000055 ribosomal large subunit export from nucleus	P	0.00732	5/53 (9.4%)	7/932 (0.8%)	NOP53 SDA1 ECM1 MEX67 RPF1
GO:0033753 establishment of ribosome localization	P	0.00732	5/53 (9.4%)	7/932 (0.8%)	NOP53 SDA1 ECM1 MEX67 RPF1
GO:0000054 ribosomal subunit export from nucleus	P	0.00732	5/53 (9.4%)	7/932 (0.8%)	NOP53 SDA1 ECM1 MEX67 RPF1
GO:0034470 ncRNA processing	P	0.0158	11/53 (20.8%)	46/932 (4.9%)	TRM13 UTP13 TRM5 FAF1 NOP53 MOT1 NOP4 CBF5 IPI3 RPF1 UTP11
GO:0051168 nuclear export	P	0.0248	6/53 (11.3%)	13/932 (1.4%)	NOP53 NUP2 SDA1 ECM1 MEX67 RPF1
GO:0034660 ncRNA metabolic process	P	0.0254	12/53 (22.6%)	57/932 (6.1%)	TRM13 UTP13 TRM5 FAF1 NOP53 MOT1 NOP4 CBF5 IPI3 DBR1 RPF1 UTP11
GO:0051656 establishment of organelle localization	P	0.0415	6/53 (11.3%)	14/932 (1.5%)	NOP53 SDA1 ECM1 PAC11 MEX67 RPF1
Cellular Component
GO Term	Aspect	P-value	Sample frequency	Background frequency	Genes
GO:0005730 nucleolus	C	1.73e-06	13/53 (24.5%)	32/932 (3.4%)	UTP13 FAF1 NOP53 TMA23 SDA1 NOP4 RRN5 CBF5 ECM1 RSA4 RPF1 UTP11 RSA3
GO:0031981 nuclear lumen	C	4.26e-05	19/53 (35.8%)	89/932 (9.5%)	UTP13 POL2 FAF1 NOP53 TMA23 NUP2 SDA1 MOT1 DAD3 NOP4 RRN5 CBF5 ECM1 IPI3 MEX67 RSA4 RPF1 UTP11 RSA3
GO:0043233 organelle lumen	C	0.000209	24/53 (45.3%)	152/932 (16.3%)	MRPL19 UTP13 TRM5 POL2 FAF1 NOP53 TMA23 SCJ1 NUP2 SDA1 MOT1 MLS1 DAD3 NOP4 RRN5 CBF5 MIP1 ECM1 IPI3 MEX67 RSA4 RPF1 UTP11 RSA3
GO:0070013 intracellular organelle lumen	C	0.000209	24/53 (45.3%)	152/932 (16.3%)	MRPL19 UTP13 TRM5 POL2 FAF1 NOP53 TMA23 SCJ1 NUP2 SDA1 MOT1 MLS1 DAD3 NOP4 RRN5 CBF5 MIP1 ECM1 IPI3 MEX67 RSA4 RPF1 UTP11 RSA3
GO:0031974 membrane-enclosed lumen	C	0.000271	25/53 (47.2%)	166/932 (17.8%)	POM152 MRPL19 UTP13 TRM5 POL2 FAF1 NOP53 TMA23 SCJ1 NUP2 SDA1 MOT1 MLS1 DAD3 NOP4 RRN5 CBF5 MIP1 ECM1 IPI3 MEX67 RSA4 RPF1 UTP11 RSA3
GO:0044428 nuclear part	C	0.000741	22/53 (41.5%)	138/932 (14.8%)	POM152 UTP13 POL2 FAF1 NOP53 TMA23 NUP2 SDA1 MOT1 DAD3 NOP4 RRN5 CBF5 ECM1 IPI3 MEX67 IOC3 RSC6 RSA4 RPF1 UTP11 RSA3
GO:0043228 non-membrane-bounded organelle	C	0.0161	20/53 (37.7%)	139/932 (14.9%)	MRPL19 UTP13 POL2 FAF1 NOP53 TMA16 TMA23 NUP2 SDA1 MOT1 DAD3 NOP4 RRN5 CBF5 ECM1 PAC11 RSA4 RPF1 UTP11 RSA3
GO:0043232 intracellular non-membrane-bounded organelle	C	0.0161	20/53 (37.7%)	139/932 (14.9%)	MRPL19 UTP13 POL2 FAF1 NOP53 TMA16 TMA23 NUP2 SDA1 MOT1 DAD3 NOP4 RRN5 CBF5 ECM1 PAC11 RSA4 RPF1 UTP11 RSA3
GO:0030684 preribosome	C	0.0248	6/53 (11.3%)	13/932 (1.4%)	UTP13 CBF5 ECM1 RPF1 UTP11 RSA3
climpdr-down
no term found
nlim-qdr-up
no term found
nlimqdr-down
no term found
nlim-pdr-up
Biological Process
GO Term	Aspect	P-value	Sample frequency	Background frequency	Genes
GO:0042254 ribosome biogenesis	P	3.19e-10	21/92 (22.8%)	37/932 (4.0%)	FAF1 NOP53 DBP10 TMA23 SDA1 CBF5 ECM1 RRP7 UTP11 RRP42 NAF1 UTP13 RRP12 NOP4 NOP6 NAN1 IPI3 NSR1 RSA4 RPF1 RSA3
GO:0034470 ncRNA processing	P	8.28e-09	22/92 (23.9%)	46/932 (4.9%)	TRM13 FAF1 NOP53 DBP10 CBF5 RRP7 SUA5 UTP11 RRP42 NAF1 UTP13 PUS1 RRP12 TRM5 SAP185 NOP4 KTI12 NOP6 NAN1 IPI3 NSR1 RPF1
GO:0022613 ribonucleoprotein complex biogenesis	P	9e-09	21/92 (22.8%)	42/932 (4.5%)	FAF1 NOP53 DBP10 TMA23 SDA1 CBF5 ECM1 RRP7 UTP11 RRP42 NAF1 UTP13 RRP12 NOP4 NOP6 NAN1 IPI3 NSR1 RSA4 RPF1 RSA3
GO:0006364 rRNA processing	P	5.81e-08	16/92 (17.4%)	26/932 (2.8%)	FAF1 NOP53 DBP10 CBF5 RRP7 UTP11 RRP42 NAF1 UTP13 RRP12 NOP4 NOP6 NAN1 IPI3 NSR1 RPF1
GO:0016072 rRNA metabolic process	P	2.83e-07	16/92 (17.4%)	28/932 (3.0%)	FAF1 NOP53 DBP10 CBF5 RRP7 UTP11 RRP42 NAF1 UTP13 RRP12 NOP4 NOP6 NAN1 IPI3 NSR1 RPF1
GO:0034660 ncRNA metabolic process	P	1.54e-06	22/92 (23.9%)	57/932 (6.1%)	TRM13 FAF1 NOP53 DBP10 CBF5 RRP7 SUA5 UTP11 RRP42 NAF1 UTP13 PUS1 RRP12 TRM5 SAP185 NOP4 KTI12 NOP6 NAN1 IPI3 NSR1 RPF1
GO:0071843 cellular component biogenesis at cellular level	P	6.54e-06	23/92 (25.0%)	66/932 (7.1%)	FAF1 NOP53 DBP10 TMA23 SDA1 CBF5 ECM1 RRP7 UTP11 RRP42 NAF1 UTP13 RRP12 YEH2 NOP4 SMI1 NOP6 NAN1 IPI3 NSR1 RSA4 RPF1 RSA3
GO:0042274 ribosomal small subunit biogenesis	P	0.000337	9/92 (9.8%)	13/932 (1.4%)	FAF1 TMA23 RRP7 UTP11 UTP13 RRP12 NOP6 NAN1 NSR1
GO:0006396 RNA processing	P	0.000418	22/92 (23.9%)	74/932 (7.9%)	TRM13 FAF1 NOP53 DBP10 CBF5 RRP7 SUA5 UTP11 RRP42 NAF1 UTP13 PUS1 RRP12 TRM5 SAP185 NOP4 KTI12 NOP6 NAN1 IPI3 NSR1 RPF1
GO:0042273 ribosomal large subunit biogenesis	P	0.0024	7/92 (7.6%)	9/932 (1.0%)	NOP53 DBP10 SDA1 IPI3 RSA4 RPF1 RSA3
GO:0042255 ribosome assembly	P	0.00548	6/92 (6.5%)	7/932 (0.8%)	RRP7 IPI3 NSR1 RSA4 RPF1 RSA3
GO:0070925 organelle assembly	P	0.0202	6/92 (6.5%)	8/932 (0.9%)	RRP7 IPI3 NSR1 RSA4 RPF1 RSA3
Cellular Component
GO Term	Aspect	P-value	Sample frequency	Background frequency	Genes
GO:0005730 nucleolus	C	2.01e-13	22/92 (23.9%)	32/932 (3.4%)	FAF1 NOP53 DBP10 TMA23 IFH1 SDA1 CBF5 ECM1 RRP7 UTP11 RRP42 UTP13 RRP12 YCR016W NOP4 FOB1 NOP6 NAN1 NSR1 RSA4 RPF1 RSA3
GO:0030684 preribosome	C	3.48e-07	11/92 (12.0%)	13/932 (1.4%)	DBP10 CBF5 ECM1 RRP7 UTP11 UTP13 RRP12 NOP6 NAN1 RPF1 RSA3
GO:0031981 nuclear lumen	C	1.41e-06	28/92 (30.4%)	89/932 (9.5%)	POL32 FAF1 NOP53 DBP10 TMA23 IFH1 SDA1 DAD3 CBF5 ECM1 RRP7 UTP11 RRP42 NAF1 UTP13 RRP12 POL2 RIF1 YCR016W NOP4 FOB1 NOP6 NAN1 IPI3 NSR1 RSA4 RPF1 RSA3
GO:0070013 intracellular organelle lumen	C	0.00111	33/92 (35.9%)	152/932 (16.3%)	POL32 FAF1 NOP53 DBP10 TMA23 IFH1 SDA1 DAD3 CBF5 ECM1 RRP7 UTP11 RRP42 NAF1 UTP13 RRP12 TRM5 POL2 POT1 RIF1 YCR016W MLS1 NOP4 FOB1 CTA1 CAT2 NOP6 NAN1 IPI3 NSR1 RSA4 RPF1 RSA3
GO:0043233 organelle lumen	C	0.00111	33/92 (35.9%)	152/932 (16.3%)	POL32 FAF1 NOP53 DBP10 TMA23 IFH1 SDA1 DAD3 CBF5 ECM1 RRP7 UTP11 RRP42 NAF1 UTP13 RRP12 TRM5 POL2 POT1 RIF1 YCR016W MLS1 NOP4 FOB1 CTA1 CAT2 NOP6 NAN1 IPI3 NSR1 RSA4 RPF1 RSA3
GO:0043228 non-membrane-bounded organelle	C	0.00145	31/92 (33.7%)	139/932 (14.9%)	POL32 FAF1 NOP53 DBP10 TMA16 TMA23 IFH1 SDA1 DAD3 CBF5 ECM1 RRP7 SUA5 UTP11 RRP42 UTP13 RRP12 POL2 RIF1 PEA2 YCR016W YIH1 NOP4 FOB1 NOP6 NAN1 NSR1 PAC11 RSA4 RPF1 RSA3
GO:0043232 intracellular non-membrane-bounded organelle	C	0.00145	31/92 (33.7%)	139/932 (14.9%)	POL32 FAF1 NOP53 DBP10 TMA16 TMA23 IFH1 SDA1 DAD3 CBF5 ECM1 RRP7 SUA5 UTP11 RRP42 UTP13 RRP12 POL2 RIF1 PEA2 YCR016W YIH1 NOP4 FOB1 NOP6 NAN1 NSR1 PAC11 RSA4 RPF1 RSA3
GO:0030686 90S preribosome	C	0.00548	6/92 (6.5%)	7/932 (0.8%)	CBF5 RRP7 UTP13 RRP12 NOP6 NAN1
GO:0031974 membrane-enclosed lumen	C	0.00991	33/92 (35.9%)	166/932 (17.8%)	POL32 FAF1 NOP53 DBP10 TMA23 IFH1 SDA1 DAD3 CBF5 ECM1 RRP7 UTP11 RRP42 NAF1 UTP13 RRP12 TRM5 POL2 POT1 RIF1 YCR016W MLS1 NOP4 FOB1 CTA1 CAT2 NOP6 NAN1 IPI3 NSR1 RSA4 RPF1 RSA3
GO:0044428 nuclear part	C	0.0428	28/92 (30.4%)	138/932 (14.8%)	POL32 FAF1 NOP53 DBP10 TMA23 IFH1 SDA1 DAD3 CBF5 ECM1 RRP7 UTP11 RRP42 NAF1 UTP13 RRP12 POL2 RIF1 YCR016W NOP4 FOB1 NOP6 NAN1 IPI3 NSR1 RSA4 RPF1 RSA3
nlimpdr-down
GO Term	Aspect	P-value	Sample frequency	Background frequency	Genes
GO:0000502 proteasome complex	C	0.0187	7/147 (4.8%)	8/932 (0.9%)	UBC5 RPN11 PRE8 PRE6 PRE4 RPT2 NAS6
