# Supplementary material for: Yeast cells with impaired drug resistance accumulate glycerol and glucose
Source: Royal Society of Chemistry journal article supplement (doi:10.1039/c2mb25512j), 2013-10-22
Supplement: c2mb25512j_2.xlsx [file c2mb25512j_2.xlsx]

## Sheet: qdr
#Total number of ORFs used =	5456								#Feature	Z-score	P-value
#Total number of significantly changed ORFs =	252								YMR164c	2.59983	0.00466351	MSS1	Transcription factor involved in regulation of invasive growth and starch degradation; controls the activation of MUC1 and STA2 in response to nutritional signals
#Mean_all =	0.0893308	#Std_all=	0.910706						YHR178w	2.52095	0.00585188	STB5	Transcription factor, involved in regulating multidrug resistance and oxidative stress response; forms a heterodimer with Pdr1p; contains a Zn(II)2Cys6 zinc finger domain that interacts with a pleiotropic drug resistance element in vitro
#kmax, imax = 100, 10000									YDR216w	2.14273	0.0160675	ADR1	Carbon source-responsive zinc-finger transcription factor, required for transcription of the glucose-repressed gene ADH2, of peroxisomal protein genes, and of genes required for ethanol, glycerol, and fatty acid utilization
#Feature	Number of neighbors	Z-score	P-value	Average Z	StdDev Z	Significance count			YGL166w	1.90055	0.0286804	CUP2	Copper-binding transcription factor; activates transcription of the metallothionein genes CUP1-1 and CUP1-2 in response to elevated copper concentrations
YAL051w	246	-0.161091	0.563989	0.0799643	0.987627	13			YOR038c	1.79914	0.035998	HIR2	Subunit of the HIR complex, a nucleosome assembly complex involved in regulation of histone gene transcription; recruits Swi-Snf complexes to histone gene promoters; promotes heterochromatic gene silencing with Asf1p
YBL005w	484	1.69912	0.0446482	0.159671	0.955096	32			YBL005w	1.69912	0.0446482	PDR3	Transcriptional activator of the pleiotropic drug resistance network, regulates expression of ATP-binding cassette (ABC) transporters through binding to cis-acting sites known as PDREs (PDR responsive elements); post-translationally up-regulated in cells lacking a functional mitochondrial genome
YBL008w	64	0.225265	0.410887	0.114977	1.0087	3			YGL181w	1.65221	0.0492457	GTS1	Protein involved in Arf3p regulation and in transcription regulation; localizes to the nucleus and to endocytic patches; contains an N-terminal Zn-finger and ArfGAP homology domain, a C-terminal glutamine-rich region, and a UBA (ubiquitin associated) domain; gts1 mutations affect budding, cell size, heat tolerance, sporulation, life span, ultradian rhythms, endocytosis; expression oscillates in a…
YBL021c	167	1.49282	0.0677419	0.194575	0.920539	9			YCR093w	1.56288	0.0590406
YBL103c	199	0.468653	0.319659	0.119589	0.933342	11			YBL021c	1.49282	0.0677419		GTS1 & STB5 self interaction sadece, kendi aralarında yok
YBR049c	285	-0.604431	0.727221	0.0567053	0.929354	12			YIL101c	1.41529	0.0784921
YBR066c	139	-0.581068	0.719403	0.0444085	0.806777	4			YLR403w	1.37406	0.0847109
YBR083w	506	0.123768	0.450749	0.0943358	0.914382	30			YNL068c	1.32016	0.0933904
YBR182c	120	-0.692621	0.755726	0.0317007	0.875109	7			YDR146c	1.31312	0.0945708
YBR215w	1	-2.79608	0.997414	-2.46288	0	0			YGR288w	1.31122	0.0948914
YBR240c	66	0.730898	0.232421	0.171313	0.815127	3			YER169w	1.27035	0.10198
YBR297w	123	-0.0505148	0.520144	0.085167	0.859806	6			YHL027w	1.24818	0.105983
YCL055w	25	-0.729466	0.767142	-0.0437155	0.981219	1			YLR131c	1.20527	0.114049
YCL066w	6	-0.200536	0.579469	0.0145922	0.3115	0			YHR006w	1.19891	0.115281
YCR018c	57	0.230951	0.408676	0.117194	0.723257	1			YFL021w	1.17715	0.119567
YCR065w	223	-1.1034	0.865072	0.0220028	0.941123	12			YGL162w	1.13374	0.128453
YCR093w	1	1.56288	0.0590406	1.51566	0	0			YER111c	1.13276	0.128657
YCR096c	3	-0.548758	0.708414	-0.199823	0.439385	0			YDL056w	1.02506	0.152667
YCR097w	10	0.440651	0.329733	0.216371	0.324971	0			YDR096w	1.01255	0.155637
YCR106w	38	-0.967434	0.833336	-0.0537604	0.973805	2			YMR037c	0.943219	0.172784
YDL020c	919	-1.26406	0.896896	0.0513545	0.918298	35			YPL049c	0.937462	0.174261
YDL056w	434	1.02506	0.152667	0.134143	0.893909	25			YER045c	0.923392	0.177901
YDL106c	144	-1.44755	0.926129	-0.0205997	0.935261	5			YLR182w	0.916835	0.179614
YDL170w	88	-0.525423	0.700355	0.0382698	0.982134	5			YOL108c	0.890195	0.186681
YDR034c	5	0.308667	0.378788	0.21519	1.02386	0			YMR021c	0.886551	0.18766
YDR043c	352	-0.370611	0.644536	0.0713287	0.843979	13			YDR463w	0.882334	0.188798
YDR081c	16	0.381081	0.351571	0.176169	1.0476	2			YIL122w	0.856179	0.195949
YDR096w	184	1.01255	0.155637	0.157333	0.903619	9			YNL167c	0.851788	0.197166
YDR123c	150	-0.0134276	0.505357	0.0883198	0.96664	9			YFL044c	0.848389	0.198111
YDR146c	180	1.31312	0.0945708	0.178497	0.850709	11			YPL139c	0.823463	0.205123
YDR207c	239	-0.872587	0.808556	0.0378988	0.842694	9			YLR098c	0.797248	0.212654
YDR213w	184	-2.02111	0.978366	-0.0464373	0.958369	7			YNL309w	0.766552	0.221674
YDR216w	419	2.14273	0.0160675	0.184674	0.941308	28			YKL038w	0.761428	0.223201
YDR253c	89	-0.100173	0.539896	0.0796382	1.0479	6			YDR421w	0.745552	0.227969
YDR259c	276	-0.926977	0.823031	0.0384901	0.924825	14			YPL133c	0.731294	0.2323
YDR277c	64	-1.78052	0.962505	-0.113546	0.896243	1			YBR240c	0.730898	0.232421
YDR310c	134	-1.21341	0.887513	-0.00619911	0.777831	3			YOR140w	0.692671	0.244258
YDR421w	88	0.745552	0.227969	0.161746	1.01372	5			YMR172w	0.691361	0.244669
YDR423c	454	-1.18938	0.882854	0.0384797	0.938647	24			YKL043w	0.688155	0.245678
YDR448w	3	0.541683	0.294018	0.374588	1.23485	1			YGL013c	0.65581	0.255973
YDR451c	291	-0.864427	0.806323	0.0431589	1.0037	19			YGL252c	0.621917	0.266998
YDR463w	209	0.882334	0.188798	0.144927	0.98244	13			YNL255c	0.604065	0.2729
YDR480w	1	-0.783163	0.783234	-0.62563	0	0			YFR034c	0.577601	0.281767
YDR501w	182	-2.1389	0.983778	-0.0551367	1.02852	7			YGL035c	0.557998	0.288423
YEL009c	540	-1.54891	0.939298	0.0286155	0.932684	22			YDR448w	0.541683	0.294018
YER028c	11	-0.850133	0.802374	-0.14448	0.85027	1			YPL038w	0.538934	0.294966
YER040w	156	-0.697855	0.757366	0.0384084	1.01259	9			YKL020c	0.532776	0.297094
YER045c	4	0.923392	0.177901	0.510464	1.09711	1			YLR013w	0.487253	0.31304
YER068w	28	-0.48796	0.687211	0.00522929	1.13517	1			YKL005c	0.483629	0.314325
YER088c	256	-0.953569	0.829849	0.0350259	0.956143	9			YLR014c	0.481836	0.314961
YER109c	222	0.314398	0.376609	0.108546	0.960035	13			YBL103c	0.468653	0.319659
YER111c	507	1.13276	0.128657	0.135146	0.94039	25			YNL216w	0.457191	0.323767
YER161c	20	-0.38758	0.650836	0.0102755	0.90238	1			YCR097w	0.440651	0.329733
YER169w	74	1.27035	0.10198	0.223906	0.855871	2			YLR256w	0.426665	0.334812
YFL021w	140	1.17715	0.119567	0.179973	0.976328	10			YML027w	0.425577	0.335208
YFL031w	201	0.102016	0.459372	0.0958764	0.950125	9			YJR127c	0.407394	0.341859
YFL044c	90	0.848389	0.198111	0.170816	1.05443	8			YOR344c	0.385127	0.350071
YFR028c	60	-0.353308	0.638071	0.0477378	0.907276	2			YDR081c	0.381081	0.351571
YFR034c	353	0.577601	0.281767	0.117327	0.86339	11			YML099c	0.372847	0.354631
YGL013c	555	0.65581	0.255973	0.114679	0.946492	30			YOR358w	0.356748	0.36064
YGL035c	223	0.557998	0.288423	0.123364	0.862707	14			YJL089w	0.347973	0.36393
YGL071w	678	-0.35617	0.639143	0.0768676	0.944917	36			YPL177c	0.342259	0.366078
YGL073w	541	-1.06609	0.85681	0.0475779	0.916498	19			YER109c	0.314398	0.376609
YGL096w	266	-0.331461	0.629852	0.070807	0.986082	20			YDR034c	0.308667	0.378788
YGL162w	70	1.13374	0.128453	0.212818	0.860808	6			YHL020c	0.307636	0.37918
YGL166w	22	1.90055	0.0286804	0.458752	1.06421	3			YOL067c	0.281698	0.389087
YGL181w	58	1.65221	0.0492457	0.287054	0.855062	4			YGR249w	0.264516	0.395691
YGL192w	102	0.100631	0.459922	0.0983965	0.835906	3			YKL032c	0.24427	0.403511
YGL209w	52	-0.188164	0.574626	0.0655256	0.997407	7			YNL204c	0.233874	0.407541
YGL237c	169	0.0107404	0.495715	0.0900723	0.912536	6			YCR018c	0.230951	0.408676
YGL252c	5	0.621917	0.266998	0.342984	1.01098	0			YBL008w	0.225265	0.410887
YGL254w	83	0.050647	0.479803	0.0943812	0.921213	5			YMR280c	0.213226	0.415575
YGR044c	218	-0.623976	0.733678	0.0508177	0.898923	9			YMR016c	0.200997	0.42035
YGR249w	271	0.264516	0.395691	0.10396	0.894674	7			YPR104c	0.193272	0.423373
YGR288w	6	1.31122	0.0948914	0.577564	0.601448	0			YPL075w	0.163975	0.434875
YHL009c	37	-0.367042	0.643206	0.0342981	1.03476	2			YIR033w	0.157833	0.437294
YHL020c	25	0.307636	0.37918	0.145398	0.925359	2			YPR199c	0.141916	0.443573
YHL027w	188	1.24818	0.105983	0.172262	0.824368	10			YNL103w	0.124115	0.450612
YHR006w	301	1.19891	0.115281	0.152275	0.882185	15			YBR083w	0.123768	0.450749
YHR084w	1293	-1.20714	0.886311	0.0587596	0.891296	57			YHR206w	0.122767	0.451146
YHR124w	33	-0.234666	0.592766	0.0520639	0.665448	0			YFL031w	0.102016	0.459372
YHR178w	304	2.52095	0.00585188	0.221038	0.993466	22			YGL192w	0.100631	0.459922
YHR200w	1	-0.843144	0.800426	-0.680376	0	0			YOL116w	0.0803973	0.467961
YHR206w	367	0.122767	0.451146	0.0951607	0.857003	12			YJR094c	0.0780328	0.468901
YIL036w	181	-1.10962	0.866419	0.0141715	1.0285	10			YMR312w	0.0741488	0.470446
YIL101c	147	1.41529	0.0784921	0.195684	0.885627	10			YGL254w	0.050647	0.479803
YIL122w	91	0.856179	0.195949	0.171111	0.841486	4			YGL237c	0.0107404	0.495715
YIL131c	227	-0.42299	0.663849	0.063743	0.935233	10			YML007w	-0.00127728	0.50051
YIL154c	3	-0.820609	0.794065	-0.343025	0.160873	0			YDR123c	-0.0134276	0.505357
YIR013c	115	-0.618593	0.731908	0.036751	0.920946	7			YKL185w	-0.0385373	0.51537
YIR017c	46	-1.02296	0.846837	-0.0481783	0.92886	1			YBR297w	-0.0505148	0.520144
YIR018w	413	-0.0827319	0.532968	0.0856154	0.981752	25			YOR032c	-0.0714437	0.528478
YIR023w	213	-0.34915	0.636512	0.0675245	1.00003	13			YIR018w	-0.0827319	0.532968
YIR033w	27	0.157833	0.437294	0.116996	0.653934	1			YDR253c	-0.100173	0.539896
YJL056c	157	-1.79372	0.963571	-0.0411204	0.924097	5			YPR015c	-0.110389	0.543949
YJL089w	87	0.347973	0.36393	0.123315	0.893163	4			YNL027w	-0.111053	0.544213
YJL103c	19	-0.452878	0.674682	-0.00543926	0.769596	0			YMR042w	-0.111455	0.544372
YJL110c	120	-0.926155	0.822817	0.0122738	0.944776	5			YLR183c	-0.148394	0.558984
YJL176c	6	-0.262948	0.603705	-0.00864986	0.934368	1			YAL051w	-0.161091	0.563989
YJL206c	45	-0.293969	0.615609	0.0493622	0.85592	1			YNL314w	-0.167082	0.566347
YJR060w	305	-0.38804	0.651007	0.0690813	0.960965	15			YNL199c	-0.176358	0.569993
YJR094c	18	0.0780328	0.468901	0.106067	0.348172	0			YGL209w	-0.188164	0.574626
YJR127c	47	0.407394	0.341859	0.143478	0.930145	2			YCL066w	-0.200536	0.579469
YJR147w	39	-0.441823	0.670691	0.0248126	0.637659	0			YML076c	-0.21728	0.586005
YKL005c	20	0.483629	0.314325	0.187903	0.779535	1			YHR124w	-0.234666	0.592766
YKL015w	132	-0.659739	0.745289	0.0369923	0.998738	9			YOR363c	-0.253222	0.599952
YKL020c	48	0.532776	0.297094	0.159407	0.828502	4			YJL176c	-0.262948	0.603705
YKL032c	106	0.24427	0.403511	0.110938	1.01798	7			YPL016w	-0.262948	0.603705
YKL038w	60	0.761428	0.223201	0.17891	1.07109	5			YLR223c	-0.267691	0.605532
YKL043w	451	0.688155	0.245678	0.118839	0.908689	20			YJL206c	-0.293969	0.615609
YKL062w	448	-1.68243	0.953757	0.0169219	0.911977	20			YPR008w	-0.29998	0.617904
YKL109w	368	-0.838501	0.799125	0.049507	0.92819	16			YGL096w	-0.331461	0.629852
YKL112w	642	-1.33482	0.909032	0.0413457	0.901656	24			YIR023w	-0.34915	0.636512
YKL185w	100	-0.0385373	0.51537	0.0858041	0.913737	5			YFR028c	-0.353308	0.638071
YKR034w	64	-0.594692	0.723975	0.021558	0.788692	0			YGL071w	-0.35617	0.639143
YKR099w	121	-0.930739	0.824006	0.0122133	0.975934	3			YHL009c	-0.367042	0.643206
YLR013w	134	0.487253	0.31304	0.127674	0.860376	8			YPL270w	-0.367094	0.643226
YLR014c	24	0.481836	0.314961	0.178976	0.79242	1			YDR043c	-0.370611	0.644536
YLR098c	80	0.797248	0.212654	0.170551	0.88164	1			YER161c	-0.38758	0.650836
YLR131c	137	1.20527	0.114049	0.18315	0.905641	9			YJR060w	-0.38804	0.651007
YLR176c	185	-2.39529	0.991696	-0.0711346	0.855835	5			YIL131c	-0.42299	0.663849
YLR182w	208	0.916835	0.179614	0.14724	0.97046	11			YOR372c	-0.430477	0.666576
YLR183c	218	-0.148394	0.558984	0.080164	0.897118	5			YJR147w	-0.441823	0.670691
YLR223c	280	-0.267691	0.605532	0.0747481	0.937856	17			YJL103c	-0.452878	0.674682
YLR228c	258	-2.46287	0.993109	-0.050368	0.942893	8			YOR077w	-0.47603	0.682974
YLR256w	163	0.426665	0.334812	0.11977	0.890793	9			YER068w	-0.48796	0.687211
YLR266c	17	-1.15357	0.875662	-0.165827	0.851101	0			YDL170w	-0.525423	0.700355
YLR375w	19	-0.72234	0.764957	-0.0618072	1.35917	2			YCR096c	-0.548758	0.708414
YLR403w	2095	1.37406	0.0847109	0.116658	0.921856	106			YOR380w	-0.553001	0.709868
YLR451w	500	-1.56106	0.940745	0.0257369	0.920848	18			YMR043w	-0.562857	0.713234
YML007w	1643	-0.00127728	0.50051	0.0892985	0.926503	86			YPR094w	-0.580007	0.719045
YML027w	431	0.425577	0.335208	0.107996	0.926412	25			YBR066c	-0.581068	0.719403
YML051w	4	-1.35374	0.912091	-0.528254	0.772924	0			YKR034w	-0.594692	0.723975
YML076c	27	-0.21728	0.586005	0.0511784	0.820179	0			YBR049c	-0.604431	0.727221
YML099c	87	0.372847	0.354631	0.125745	0.936201	6			YOR113w	-0.605278	0.727503
YMR016c	960	0.200997	0.42035	0.0952334	0.907523	53			YIR013c	-0.618593	0.731908
YMR021c	86	0.886551	0.18766	0.176441	0.875338	3			YGR044c	-0.623976	0.733678
YMR037c	852	0.943219	0.172784	0.118753	0.956816	51			YOR162c	-0.637206	0.738005
YMR042w	88	-0.111455	0.544372	0.0784872	0.861879	4			YKL015w	-0.659739	0.745289
YMR043w	391	-0.562857	0.713234	0.0633946	0.873918	15			YBR182c	-0.692621	0.755726
YMR070w	122	-1.00231	0.841904	0.00662523	0.90606	5			YER040w	-0.697855	0.757366
YMR164c	59	2.59983	0.00466351	0.397819	0.923124	4			YLR375w	-0.72234	0.764957
YMR172w	67	0.691361	0.244669	0.166296	0.923206	2			YCL055w	-0.729466	0.767142
YMR182c	88	-1.80155	0.964192	-0.0857075	0.845593	3			YDR480w	-0.783163	0.783234
YMR280c	115	0.213226	0.415575	0.107436	0.885912	7			YIL154c	-0.820609	0.794065
YMR312w	1	0.0741488	0.470446	0.156861	0	0			YKL109w	-0.838501	0.799125
YNL027w	275	-0.111053	0.544213	0.0832212	0.901522	9			YHR200w	-0.843144	0.800426
YNL068c	281	1.32016	0.0933904	0.161067	1.02634	22			YER028c	-0.850133	0.802374
YNL103w	1071	0.124115	0.450612	0.0927798	0.914243	51			YDR451c	-0.864427	0.806323
YNL167c	317	0.851788	0.197166	0.132904	0.98896	18			YDR207c	-0.872587	0.808556
YNL199c	166	-0.176358	0.569993	0.0768474	0.898973	5			YOL089c	-0.895629	0.814775
YNL204c	59	0.233874	0.407541	0.117064	0.981041	2			YOR172w	-0.923648	0.822165
YNL216w	1094	0.457191	0.323767	0.101913	0.8958	56			YJL110c	-0.926155	0.822817
YNL255c	19	0.604065	0.2729	0.21566	0.781464	1			YDR259c	-0.926977	0.823031
YNL309w	47	0.766552	0.221674	0.191232	0.739954	1			YKR099w	-0.930739	0.824006
YNL314w	155	-0.167082	0.566347	0.0770906	0.839344	6			YER088c	-0.953569	0.829849
YOL004w	28	-1.30475	0.904012	-0.135501	0.581785	0			YCR106w	-0.967434	0.833336
YOL028c	170	-1.05353	0.85395	0.0156966	0.86062	7			YMR070w	-1.00231	0.841904
YOL067c	117	0.281698	0.389087	0.113049	0.893967	6			YIR017c	-1.02296	0.846837
YOL089c	84	-0.895629	0.814775	0.000254498	0.861573	5			YOL028c	-1.05353	0.85395
YOL108c	619	0.890195	0.186681	0.121912	0.89401	30			YGL073w	-1.06609	0.85681
YOL116w	39	0.0803973	0.467961	0.101043	0.942694	2			YOR028c	-1.07209	0.85816
YOR028c	385	-1.07209	0.85816	0.0395527	0.93354	22			YCR065w	-1.1034	0.865072
YOR032c	187	-0.0714437	0.528478	0.0845599	0.818303	8			YIL036w	-1.10962	0.866419
YOR038c	53	1.79914	0.035998	0.314574	0.865192	3			YLR266c	-1.15357	0.875662
YOR077w	25	-0.47603	0.682974	0.00249804	0.765481	1			YDR423c	-1.18938	0.882854
YOR113w	116	-0.605278	0.727503	0.0381048	0.907765	6			YHR084w	-1.20714	0.886311
YOR140w	38	0.692671	0.244258	0.191741	0.863641	2			YDR310c	-1.21341	0.887513
YOR162c	85	-0.637206	0.738005	0.026326	0.963045	6			YDL020c	-1.26406	0.896896
YOR172w	23	-0.923648	0.822165	-0.0863008	1.04393	2			YPR065w	-1.26472	0.897014
YOR344c	92	0.385127	0.350071	0.125908	0.954021	5			YPL089c	-1.27166	0.898253
YOR358w	175	0.356748	0.36064	0.113891	0.928764	7			YPL230w	-1.27249	0.8984
YOR363c	132	-0.253222	0.599952	0.0692343	0.950645	8			YOL004w	-1.30475	0.904012
YOR372c	320	-0.430477	0.666576	0.0674008	1.00648	17			YKL112w	-1.33482	0.909032
YOR380w	7	-0.553001	0.709868	-0.101373	1.18296	1			YML051w	-1.35374	0.912091
YPL016w	6	-0.262948	0.603705	-0.00864986	0.934368	1			YDL106c	-1.44755	0.926129
YPL038w	113	0.538934	0.294966	0.135518	0.871153	6			YEL009c	-1.54891	0.939298
YPL049c	61	0.937462	0.174261	0.198715	0.826076	5			YLR451w	-1.56106	0.940745
YPL075w	231	0.163975	0.434875	0.0991504	0.902877	11			YPL202c	-1.61229	0.946551
YPL089c	172	-1.27166	0.898253	0.000971319	0.794662	4			YKL062w	-1.68243	0.953757
YPL133c	42	0.731294	0.2323	0.192172	1.01903	5			YDR277c	-1.78052	0.962505
YPL139c	4	0.823463	0.205123	0.464881	0.542189	0			YJL056c	-1.79372	0.963571
YPL177c	73	0.342259	0.366078	0.125823	0.760191	4			YMR182c	-1.80155	0.964192
YPL202c	153	-1.61229	0.946551	-0.0294509	0.966444	7			YDR213w	-2.02111	0.978366
YPL230w	42	-1.27249	0.8984	-0.0896807	0.862097	1			YDR501w	-2.1389	0.983778
YPL270w	1	-0.367094	0.643226	-0.245873	0	0			YLR176c	-2.39529	0.991696
YPR008w	14	-0.29998	0.617904	0.0161803	1.48882	2			YLR228c	-2.46287	0.993109
YPR015c	42	-0.110389	0.543949	0.0737808	0.846176	2			YBR215w	-2.79608	0.997414
YPR065w	350	-1.26472	0.897014	0.0277419	0.86727	11
YPR094w	2	-0.580007	0.719045	-0.28502	1.0763	0
YPR104c	756	0.193272	0.423373	0.095727	0.910783	29
YPR199c	678	0.141916	0.443573	0.0942889	0.920286	40

## Sheet: pdr
#Total number of ORFs used =	5456								#Feature	Z-score	P-value
#Total number of significantly changed ORFs =	255								YBL005w	3.26061	0.000555862	PDR3	Transcriptional activator of the pleiotropic drug resistance network, regulates expression of ATP-binding cassette (ABC) transporters through binding to cis-acting sites known as PDREs (PDR responsive elements); post-translationally up-regulated in cells lacking a functional mitochondrial genome
#Mean_all =	0.0409373	#Std_all=	0.968279						YPR015c	2.88387	0.00196412	YPR015C	Putative protein of unknown function; overexpression causes a cell cycle delay or arrest
#kmax, imax = 100, 10000									YLR131c	2.69067	0.00356547	ACE2	Transcription factor required for septum destruction after cytokinesis; phosphorylation by Cbk1p blocks nuclear exit of Ace2p during the M-to-G1 transition, causing its specific localization to daughter cell nuclei, and also increases Ace2p activity; phosphorylation by Cdc28p and Pho85p prevents nuclear import during cell cycle phases other than cytokinesis; part of the RAM network that regulates…
#Feature	Number of neighbors	Z-score	P-value	Average Z	StdDev Z	Significance count			YHR178w	2.35752	0.0091987	STB5	Transcription factor, involved in regulating multidrug resistance and oxidative stress response; forms a heterodimer with Pdr1p; contains a Zn(II)2Cys6 zinc finger domain that interacts with a pleiotropic drug resistance element in vitro
YAL051w	246	-0.1332	0.552982	0.0327481	1.00365	11			YMR037c	2.07954	0.0187839	MSN2	Transcriptional activator related to Msn4p; activated in stress conditions, which results in translocation from the cytoplasm to the nucleus; binds DNA at stress response elements of responsive genes, inducing gene expression
YBL005w	484	3.26061	0.000555862	0.184406	0.954301	24			YGL073w	1.89596	0.0289826	HSF1	Trimeric heat shock transcription factor, activates multiple genes in response to stresses that include hyperthermia; recognizes variable heat shock elements (HSEs) consisting of inverted NGAAN repeats; posttranslationally regulated
YBL008w	64	-0.583881	0.72035	-0.0296335	0.855723	1			YDR423c	1.81108	0.0350641	CAD1	AP-1-like basic leucine zipper (bZIP) transcriptional activator involved in stress responses, iron metabolism, and pleiotropic drug resistance; controls a set of genes involved in stabilizing proteins; binds consensus sequence TTACTAA
YBL021c	167	-2.06093	0.980345	-0.113369	0.899208	5			YDR216w	1.75573	0.0395672	ADR1	Carbon source-responsive zinc-finger transcription factor, required for transcription of the glucose-repressed gene ADH2, of peroxisomal protein genes, and of genes required for ethanol, glycerol, and fatty acid utilization
YBL103c	199	1.36027	0.0868729	0.134293	1.00449	13			YPL139c	1.73449	0.0414158	UME1	Negative regulator of meiosis, required for repression of a subset of meiotic genes during vegetative growth, binding of histone deacetylase Rpd3p required for activity, contains a NEE box and a WD repeat motif; homologous with Wtm1p, Wtm2p
YBR049c	285	0.339104	0.367266	0.0604058	1.04127	19			YGL071w	1.73254	0.0415887	AFT1	Transcription factor involved in iron utilization and homeostasis; binds the consensus site PyPuCACCCPu and activates the expression of target genes in response to changes in iron availability; in iron-replete conditions activity is negatively regulated by Grx3p, Grx4p, and Fra2p, which regulate Aft1p translocation from the nucleus to the cytoplasm
YBR066c	139	0.515052	0.303258	0.0832558	0.95902	5			YMR164c	1.72218	0.0425183	MSS1	Transcription factor involved in regulation of invasive growth and starch degradation; controls the activation of MUC1 and STA2 in response to nutritional signals
YBR083w	506	-0.736132	0.769175	0.00928465	0.958976	16			YGL013c	1.70381	0.0442079	PDR1	Zinc cluster protein that is a master regulator involved in recruiting other zinc cluster proteins to pleiotropic drug response elements (PDREs) to fine tune the regulation of multidrug resistance genes
YBR182c	120	-1.68154	0.953671	-0.107575	0.836143	2			YKL062w	1.59711	0.0551209
YBR215w	1	1.00967	0.156326	1.0182	0	0			YNL167c	1.58009	0.0570436		STB5, UME1, AFT1, and PDR1 self regulation
YBR240c	66	0.693842	0.243891	0.123645	0.943002	4			YJR094c	1.53401	0.0625138		PDR1
YBR297w	123	0.471864	0.318512	0.0821551	0.935348	4			YDR146c	1.50538	0.0661133		HSF1
YCL055w	25	1.44552	0.0741561	0.320786	0.959729	3			YGL166w	1.498	0.067067
YCL066w	6	-0.994348	0.839973	-0.351643	1.59669	1			YCL055w	1.44552	0.0741561
YCR018c	57	-1.57298	0.942138	-0.160621	1.07351	5			YCR065w	1.44066	0.0748407
YCR065w	223	1.44066	0.0748407	0.134337	0.99992	14			YLR183c	1.37249	0.0849562
YCR093w	1	0.508842	0.305431	0.53368	0	0			YBL103c	1.36027	0.0868729
YCR096c	3	0.543453	0.293409	0.344778	0.218173	0			YFL021w	1.2981	0.0971264
YCR097w	10	-0.0807062	0.532162	0.0163916	1.2164	1			YDR096w	1.2739	0.10135
YCR106w	38	0.117953	0.453053	0.0595298	0.996882	3			YKL112w	1.21874	0.111471
YDL020c	919	-1.76838	0.961501	-0.0155087	0.991885	39			YPL049c	1.13904	0.127344
YDL056w	434	0.56384	0.286431	0.0671552	0.894696	18			YBR215w	1.00967	0.156326
YDL106c	144	0.98283	0.162845	0.12024	0.95461	7			YOL067c	0.999789	0.158706
YDL170w	88	0.663528	0.253496	0.109439	0.983632	7			YML051w	0.992018	0.160594
YDR034c	5	0.114156	0.454557	0.0905429	1.03582	0			YDL106c	0.98283	0.162845
YDR043c	352	0.739237	0.229882	0.0790969	1.02198	24			YOR162c	0.964509	0.167395
YDR081c	16	0.164979	0.43448	0.0809645	1.03943	0			YGL162w	0.961114	0.168247
YDR096w	184	1.2739	0.10135	0.131861	0.981663	9			YJR147w	0.943298	0.172764
YDR123c	150	0.205037	0.418772	0.0571776	0.952206	7			YNL027w	0.927887	0.176733
YDR146c	180	1.50538	0.0661133	0.149563	1.02999	13			YDR253c	0.92401	0.17774
YDR207c	239	-0.172086	0.568315	0.0301947	0.965163	8			YIR017c	0.874187	0.191008
YDR213w	184	-1.87941	0.969906	-0.0931188	0.939362	8			YJR060w	0.84219	0.199841
YDR216w	419	1.75573	0.0395672	0.123976	0.948963	23			YFR034c	0.828645	0.203653
YDR253c	89	0.92401	0.17774	0.135773	0.91068	3			YHR206w	0.787065	0.215622
YDR259c	276	0.384239	0.350401	0.06335	1.00552	13			YPL202c	0.785124	0.21619
YDR277c	64	-0.350328	0.636954	-0.00138153	0.8795	3			YKR034w	0.758325	0.224128
YDR310c	134	-0.146892	0.558392	0.0286973	0.980249	6			YPL177c	0.742508	0.22889
YDR421w	88	0.14021	0.444247	0.0554519	0.957375	4			YDR043c	0.739237	0.229882
YDR423c	454	1.81108	0.0350641	0.123226	0.92419	19			YGR288w	0.729729	0.232778
YDR448w	3	-0.255614	0.600876	-0.101576	1.01758	0			YBR240c	0.693842	0.243891
YDR451c	291	-2.08417	0.981428	-0.0772813	0.979773	8			YDL170w	0.663528	0.253496
YDR463w	209	0.405813	0.34244	0.0681369	0.962527	9			YGL035c	0.648845	0.258219
YDR480w	1	0.194275	0.42298	0.229357	0	0			YER028c	0.604674	0.272698
YDR501w	182	-1.35866	0.912873	-0.0564954	0.994751	6			YGL209w	0.604465	0.272767
YEL009c	540	0.0741266	0.470455	0.044045	0.956081	20			YIL036w	0.596521	0.275414
YER028c	11	0.604674	0.272698	0.217489	0.871561	1			YKR099w	0.595803	0.275653
YER040w	156	-0.94496	0.82766	-0.0322453	0.870058	5			YDL056w	0.56384	0.286431
YER045c	4	-0.0141523	0.505646	0.0343262	0.762015	0			YCR096c	0.543453	0.293409
YER068w	28	-1.38794	0.917422	-0.212789	0.866795	0			YHR006w	0.537487	0.295466
YER088c	256	0.498142	0.309192	0.0710988	0.955995	13			YBR066c	0.515052	0.303258
YER109c	222	-0.0178124	0.507106	0.0398119	1.03758	14			YCR093w	0.508842	0.305431
YER111c	507	-1.12075	0.868802	-0.00721663	0.907066	18			YER088c	0.498142	0.309192
YER161c	20	-1.03492	0.849646	-0.182884	0.782152	0			YGL181w	0.473069	0.318082
YER169w	74	0.0525363	0.479051	0.0469022	0.976811	5			YBR297w	0.471864	0.318512
YFL021w	140	1.2981	0.0971264	0.147152	0.854063	5			YLR014c	0.468317	0.319779
YFL031w	201	-0.161269	0.564059	0.0299617	0.939755	8			YJL103c	0.467944	0.319912
YFL044c	90	0.307428	0.379259	0.0723476	0.99174	8			YLR098c	0.461736	0.322135
YFR028c	60	-0.153861	0.561141	0.0217758	0.921624	1			YHL020c	0.447264	0.327342
YFR034c	353	0.828645	0.203653	0.0836485	1.0068	18			YLR182w	0.407298	0.341895
YGL013c	555	1.70381	0.0442079	0.110957	0.982592	31			YDR463w	0.405813	0.34244
YGL035c	223	0.648845	0.258219	0.0830202	0.896389	10			YOL108c	0.39318	0.347093
YGL071w	678	1.73254	0.0415887	0.105357	0.950328	38			YDR259c	0.384239	0.350401
YGL073w	541	1.89596	0.0289826	0.119853	0.88774	26			YML099c	0.381423	0.351445
YGL096w	266	-1.0152	0.844994	-0.0192768	0.998483	12			YNL068c	0.348711	0.363653
YGL162w	70	0.961114	0.168247	0.152162	0.846651	3			YIL131c	0.343219	0.365717
YGL166w	22	1.498	0.067067	0.35008	0.701605	1			YBR049c	0.339104	0.367266
YGL181w	58	0.473069	0.318082	0.101111	1.06609	6			YGL252c	0.32519	0.372519
YGL192w	102	-0.115118	0.545824	0.029953	0.972623	7			YHL009c	0.322604	0.373498
YGL209w	52	0.604465	0.272767	0.12212	1.015	2			YFL044c	0.307428	0.379259
YGL237c	169	-2.46191	0.99309	-0.142305	0.933101	3			YKL185w	0.256143	0.39892
YGL252c	5	0.32519	0.372519	0.181858	0.599998	0			YOR372c	0.24131	0.404657
YGL254w	83	-0.214821	0.585047	0.0181698	0.868847	3			YML076c	0.216907	0.414141
YGR044c	218	-1.44581	0.925885	-0.0538016	0.944762	7			YDR123c	0.205037	0.418772
YGR249w	271	-0.627763	0.73492	0.00405891	0.971554	17			YOR038c	0.199968	0.420753
YGR288w	6	0.729729	0.232778	0.329376	1.17515	1			YOR380w	0.194922	0.422727
YHL009c	37	0.322604	0.373498	0.0923367	1.08571	4			YDR480w	0.194275	0.42298
YHL020c	25	0.447264	0.327342	0.127591	0.900835	1			YMR042w	0.174639	0.430681
YHL027w	188	-1.86757	0.969089	-0.090849	1.06781	11			YIR013c	0.166143	0.434022
YHR006w	301	0.537487	0.295466	0.0709481	0.881181	8			YDR081c	0.164979	0.43448
YHR084w	1293	-0.481278	0.684841	0.0279952	0.97626	60			YMR070w	0.154924	0.43844
YHR124w	33	-0.68687	0.753918	-0.0746849	0.989739	1			YPR094w	0.140375	0.444182
YHR178w	304	2.35752	0.0091987	0.171828	0.845415	11			YDR421w	0.14021	0.444247
YHR200w	1	-0.401954	0.656141	-0.347457	0	0			YJL206c	0.131684	0.447617
YHR206w	367	0.787065	0.215622	0.0807254	0.889147	13			YCR106w	0.117953	0.453053
YIL036w	181	0.596521	0.275414	0.0838835	0.925723	8			YDR034c	0.114156	0.454557
YIL101c	147	-0.318372	0.624899	0.0155632	0.941157	5			YNL255c	0.0998711	0.460223
YIL122w	91	-1.46625	0.928709	-0.107761	0.993425	4			YEL009c	0.0741266	0.470455
YIL131c	227	0.343219	0.365717	0.0630156	0.959036	11			YER169w	0.0525363	0.479051
YIL154c	3	-0.860759	0.805315	-0.439606	0.593103	0			YMR172w	0.0103769	0.49586
YIR013c	115	0.166143	0.434022	0.0559747	1.00864	6			YLR266c	0.0025697	0.498975
YIR017c	46	0.874187	0.191008	0.165736	1.01868	3			YER045c	-0.0141523	0.505646
YIR018w	413	-0.20872	0.582667	0.0310202	0.994199	19			YER109c	-0.0178124	0.507106
YIR023w	213	-1.03144	0.848833	-0.0274287	0.967415	8			YPL038w	-0.0286698	0.511436
YIR033w	27	-1.60066	0.945274	-0.257059	0.911129	0			YPR008w	-0.0340809	0.513594
YJL056c	157	-0.667306	0.747712	-0.0105665	0.993072	8			YNL314w	-0.0498316	0.519872
YJL089w	87	-0.149967	0.559605	0.0254282	1.00804	4			YCR097w	-0.0807062	0.532162
YJL103c	19	0.467944	0.319912	0.144925	0.875525	1			YGL192w	-0.115118	0.545824
YJL110c	120	-1.03993	0.850813	-0.050892	0.883104	3			YKL005c	-0.120016	0.547765
YJL176c	6	-1.07248	0.858249	-0.382508	0.887931	0			YAL051w	-0.1332	0.552982
YJL206c	45	0.131684	0.447617	0.0600037	1.11306	4			YDR310c	-0.146892	0.558392
YJR060w	305	0.84219	0.199841	0.0876368	1.04356	21			YJL089w	-0.149967	0.559605
YJR094c	18	1.53401	0.0625138	0.390916	1.25183	1			YFR028c	-0.153861	0.561141
YJR127c	47	-0.157217	0.562463	0.0188141	0.899676	2			YJR127c	-0.157217	0.562463
YJR147w	39	0.943298	0.172764	0.187181	0.906403	2			YFL031w	-0.161269	0.564059
YKL005c	20	-0.120016	0.547765	0.0150745	1.146	1			YDR207c	-0.172086	0.568315
YKL015w	132	-2.01517	0.978057	-0.128768	0.990605	6			YIR018w	-0.20872	0.582667
YKL020c	48	-1.4241	0.922791	-0.157907	0.878448	0			YGL254w	-0.214821	0.585047
YKL032c	106	-0.529138	0.701645	-0.00875446	1.02334	6			YDR448w	-0.255614	0.600876
YKL038w	60	-1.17721	0.880444	-0.106073	0.926496	1			YIL101c	-0.318372	0.624899
YKL043w	451	-1.38329	0.916712	-0.0220837	1.00821	24			YMR016c	-0.332497	0.630243
YKL062w	448	1.59711	0.0551209	0.113991	0.954865	24			YLR375w	-0.335729	0.631462
YKL109w	368	-2.08889	0.981641	-0.0644281	0.948985	13			YDR277c	-0.350328	0.636954
YKL112w	642	1.21874	0.111471	0.0875111	1.01589	44			YHR200w	-0.401954	0.656141
YKL185w	100	0.256143	0.39892	0.0657728	0.79154	3			YOR113w	-0.42136	0.663254
YKR034w	64	0.758325	0.224128	0.132727	1.04675	5			YOR032c	-0.46528	0.679134
YKR099w	121	0.595803	0.275653	0.0933983	0.944596	4			YOL028c	-0.476884	0.683278
YLR013w	134	-0.519647	0.698345	-0.00246619	1.0858	10			YHR084w	-0.481278	0.684841
YLR014c	24	0.468317	0.319779	0.133536	0.952496	1			YPL089c	-0.497039	0.690419
YLR098c	80	0.461736	0.322135	0.0909482	0.885328	3			YOR140w	-0.513755	0.696288
YLR131c	137	2.69067	0.00356547	0.26345	0.919579	9			YLR013w	-0.519647	0.698345
YLR176c	185	-1.13344	0.871485	-0.0396769	1.03717	9			YOL116w	-0.521835	0.699108
YLR182w	208	0.407298	0.341895	0.0683018	0.902538	10			YKL032c	-0.529138	0.701645
YLR183c	218	1.37249	0.0849562	0.130933	0.948147	12			YMR312w	-0.569289	0.71542
YLR223c	280	-6.83911	1	-0.354601	1.03641	11			YNL204c	-0.576686	0.717924
YLR228c	258	-1.52563	0.936449	-0.0509587	0.99038	14			YBL008w	-0.583881	0.72035
YLR256w	163	-3.08237	0.998973	-0.192679	0.90891	3			YGR249w	-0.627763	0.73492
YLR266c	17	0.0025697	0.498975	0.0416545	1.00147	1			YMR021c	-0.638909	0.738559
YLR375w	19	-0.335729	0.631462	-0.0334838	0.915995	0			YPR065w	-0.663856	0.746609
YLR403w	2095	-1.04148	0.851173	0.0189224	0.966583	92			YJL056c	-0.667306	0.747712
YLR451w	500	-1.50464	0.933791	-0.024169	0.918137	16			YOR077w	-0.67555	0.750337
YML007w	1643	-1.00178	0.841774	0.0170265	0.976361	65			YMR043w	-0.676492	0.750636
YML027w	431	-0.938887	0.826106	-0.00281102	0.96237	18			YHR124w	-0.68687	0.753918
YML051w	4	0.992018	0.160594	0.521077	1.18488	1			YOL004w	-0.726485	0.766229
YML076c	27	0.216907	0.414141	0.0814218	0.883677	1			YBR083w	-0.736132	0.769175
YML099c	87	0.381423	0.351445	0.0805617	1.0153	6			YOR172w	-0.841165	0.799872
YMR016c	960	-0.332497	0.630243	0.0305655	0.969566	49			YIL154c	-0.860759	0.805315
YMR021c	86	-0.638909	0.738559	-0.0256851	0.945689	3			YMR182c	-0.888193	0.812782
YMR037c	852	2.07954	0.0187839	0.109911	0.902246	28			YOR344c	-0.903692	0.816921
YMR042w	88	0.174639	0.430681	0.0590037	0.890744	2			YMR280c	-0.931003	0.824074
YMR043w	391	-0.676492	0.750636	0.00784927	0.989674	19			YML027w	-0.938887	0.826106
YMR070w	122	0.154924	0.43844	0.0545541	0.872662	4			YER040w	-0.94496	0.82766
YMR164c	59	1.72218	0.0425183	0.25797	0.969133	2			YCL066w	-0.994348	0.839973
YMR172w	67	0.0103769	0.49586	0.0422216	0.675899	0			YML007w	-1.00178	0.841774
YMR182c	88	-0.888193	0.812782	-0.0506405	1.0189	4			YGL096w	-1.0152	0.844994
YMR280c	115	-0.931003	0.824074	-0.0430369	0.941691	4			YIR023w	-1.03144	0.848833
YMR312w	1	-0.569289	0.71542	-0.509343	0	0			YER161c	-1.03492	0.849646
YNL027w	275	0.927887	0.176733	0.0951192	0.9672	15			YJL110c	-1.03993	0.850813
YNL068c	281	0.348711	0.363653	0.0610985	0.949628	10			YLR403w	-1.04148	0.851173
YNL103w	1071	-2.14206	0.983906	-0.0224028	0.987466	36			YJL176c	-1.07248	0.858249
YNL167c	317	1.58009	0.0570436	0.126856	0.865678	9			YPL016w	-1.07248	0.858249
YNL199c	166	-3.11854	0.999091	-0.193276	1.02434	6			YER111c	-1.12075	0.868802
YNL204c	59	-0.576686	0.717924	-0.031656	0.808564	1			YLR176c	-1.13344	0.871485
YNL216w	1094	-3.2613	0.999445	-0.0544868	0.980941	40			YPR199c	-1.15636	0.876233
YNL255c	19	0.0998711	0.460223	0.0632159	0.991277	0			YKL038w	-1.17721	0.880444
YNL309w	47	-1.4434	0.925546	-0.162736	0.838935	1			YOL089c	-1.34644	0.91092
YNL314w	155	-0.0498316	0.519872	0.0371015	0.914802	8			YDR501w	-1.35866	0.912873
YOL004w	28	-0.726485	0.766229	-0.0918277	1.22905	1			YPL133c	-1.37531	0.915483
YOL028c	170	-0.476884	0.683278	0.00557605	0.892332	5			YKL043w	-1.38329	0.916712
YOL067c	117	0.999789	0.158706	0.130432	0.990922	10			YER068w	-1.38794	0.917422
YOL089c	84	-1.34644	0.91092	-0.101182	1.00174	3			YOR028c	-1.41494	0.921457
YOL108c	619	0.39318	0.347093	0.0562519	0.994567	34			YKL020c	-1.4241	0.922791
YOL116w	39	-0.521835	0.699108	-0.0398481	1.02624	2			YNL309w	-1.4434	0.925546
YOR028c	385	-1.41494	0.921457	-0.0288324	1.05185	15			YGR044c	-1.44581	0.925885
YOR032c	187	-0.46528	0.679134	0.00804269	0.999755	10			YIL122w	-1.46625	0.928709
YOR038c	53	0.199968	0.420753	0.0675828	1.03318	4			YLR451w	-1.50464	0.933791
YOR077w	25	-0.67555	0.750337	-0.0897091	1.00104	1			YLR228c	-1.52563	0.936449
YOR113w	116	-0.42136	0.663254	0.00311974	0.95514	8			YCR018c	-1.57298	0.942138
YOR140w	38	-0.513755	0.696288	-0.0396355	0.792735	0			YIR033w	-1.60066	0.945274
YOR162c	85	0.964509	0.167395	0.14223	0.932598	6			YBR182c	-1.68154	0.953671
YOR172w	23	-0.841165	0.799872	-0.128686	1.0429	1			YDL020c	-1.76838	0.961501
YOR344c	92	-0.903692	0.816921	-0.0501917	1.02598	5			YPL230w	-1.79965	0.964042
YOR358w	175	-2.07544	0.981027	-0.110863	0.872127	3			YOR363c	-1.82415	0.965935
YOR363c	132	-1.82415	0.965935	-0.112677	1.12133	6			YHL027w	-1.86757	0.969089
YOR372c	320	0.24131	0.404657	0.0540194	0.963377	15			YDR213w	-1.87941	0.969906
YOR380w	7	0.194922	0.422727	0.1124	0.803672	0			YPL270w	-1.95012	0.974419
YPL016w	6	-1.07248	0.858249	-0.382508	0.887931	0			YKL015w	-2.01517	0.978057
YPL038w	113	-0.0286698	0.511436	0.0383715	0.857881	5			YBL021c	-2.06093	0.980345
YPL049c	61	1.13904	0.127344	0.182129	0.885912	2			YOR358w	-2.07544	0.981027
YPL075w	231	-5.25474	1	-0.29364	1.00416	10			YDR451c	-2.08417	0.981428
YPL089c	172	-0.497039	0.690419	0.00429488	0.996516	7			YKL109w	-2.08889	0.981641
YPL133c	42	-1.37531	0.915483	-0.16435	0.973328	1			YNL103w	-2.14206	0.983906
YPL139c	4	1.73449	0.0414158	0.880259	0.925691	1			YGL237c	-2.46191	0.99309
YPL177c	73	0.742508	0.22889	0.125092	0.987178	4			YLR256w	-3.08237	0.998973
YPL202c	153	0.785124	0.21619	0.102404	0.902988	9			YNL199c	-3.11854	0.999091
YPL230w	42	-1.79965	0.964042	-0.227712	0.819492	0			YNL216w	-3.2613	0.999445
YPL270w	1	-1.95012	0.974419	-1.84521	0	0			YPR104c	-3.84686	0.99994
YPR008w	14	-0.0340809	0.513594	0.0322495	0.800437	1			YLR223c	-6.83911	1
YPR015c	42	2.88387	0.00196412	0.471626	0.987982	6			YPL075w	-5.25474	1
YPR065w	350	-0.663856	0.746609	0.0066189	0.94835	15
YPR094w	2	0.140375	0.444182	0.137303	0.791173	0
YPR104c	756	-3.84686	0.99994	-0.0944631	0.998252	32
YPR199c	678	-1.15636	0.876233	-0.00202832	0.952099	32

## Sheet: significance
ORF	qdr vs ho		ORF	pdr vs ho		ORF	qdr vs ho			ORF	pdr vs ho			ORF	C-lim-qdr3-ho	C-lim-pdr3-ho	N-lim-qdr3-ho	N-lim-pdr3-ho
YAL001C	0.908697		YAL001C	0.862849		YDL146W	9.49987e-05	down		YOR270C	0.000409496	down		YAL001C	0.214986	0.25289	-0.287558	-0.394576
YAL002W	0.504776		YAL002W	0.293432		YGL116W	0.000176973	down		YPR003C	0.000774466	down		YAL002W	-0.721576	-0.250547	0.005413	-0.744866
YAL003W	0.539532		YAL003W	0.785504		YHR171W	0.000369392	down		YGR295C	0.00187993	down		YAL003W	0.376635	-0.386166	-0.023418	0.185811
YAL005C	0.894171		YAL005C	0.844646		YDR418W	0.00185216	down		YGR232W	0.00205558	down		YAL005C	0.568665	0.354759	-0.405256	-0.589994
YAL007C	0.300842		YAL007C	0.860798		YGR063C	0.00195494	down		YOL133W	0.00264284	down		YAL007C	0.426316	-0.446078	0.137895	0.283875
YAL008W	0.647743		YAL008W	0.312117		YJR123W	0.00269216	down		YAL041W	0.00264637	down		YAL008W	0.231356	-0.361879	-0.054677	-1.19038
YAL009W	0.341392		YAL009W	0.0368214		YGL146C	0.00327538	down		YNL320W	0.00273442	down		YAL009W	-0.420285	-0.528234	-0.106932	-0.470409
YAL010C	0.302173		YAL010C	0.239943		YIL146C	0.00371978	down		YFL052W	0.00289826	down		YAL010C	-0.473311	-0.394441	-0.152004	-0.170732
YAL011W	0.605356		YAL011W	0.675416		YDR381C-A	0.00393066	down		YAL044W-A	0.00351538	down		YAL011W	0.034229	0.093961	-0.204939	-0.026566
YAL012W	0.384084		YAL012W	0.126193		YDR263C	0.00407534	down		YDR394W	0.00395743	down		YAL012W	1.32396	0.41703	0.243769	0.626668
YAL013W	0.343982		YAL013W	0.434401		YFR008W	0.0045606	down		YAL064C-A	0.00403837	down		YAL013W	0.765031	1.09871	0.191334	0.113617
YAL014C	0.127125		YAL014C	0.579714		YDL101C	0.00490101	down		YNL167C	0.00455553	down		YAL014C	0.306418	0.042845	0.203266	-0.340384
YAL015C	0.994956		YAL015C	0.450118		YPL100W	0.00536146	down		YOL107W	0.00486013	down		YAL015C	-0.456928	1.11397	0.464226	0.087464
YAL016C-B	0.0547158		YAL016C-B	0.371012		YBR010W	0.00539263	down		YOR388C	0.00490221	down		YAL016C-B	-2.73647	-0.287453	-2.30233	-1.39925
YAL016W	0.254307		YAL016W	0.0720237		YPR158W	0.00584718	down		YIL098C	0.00550245	down		YAL016W	-0.10745	-0.29169	-0.264454	-0.36647
YAL017W	0.960167		YAL017W	0.516506		YLR418C	0.00605467	down		YMR026C	0.00571842	down		YAL017W	0.420771	0.020211	-0.371156	-0.77936
YAL018C	0.673006		YAL018C	0.869149		YJL058C	0.00619653	down		YCR009C	0.00586168	down		YAL018C	-1.9673	-0.168883	0.548189	0.25785
YAL019W	0.413823		YAL019W	0.283869		YGL086W	0.00620427	down		YOL131W	0.00627825	down		YAL019W	0.3918	0.241343	0.053363	0.683359
YAL020C	0.232714		YAL020C	0.35266		YDR261C-D	0.00654531	down		YLL007C	0.00651755	down		YAL020C	1.22216	0.739905	0.545566	0.174369
YAL021C	0.105686		YAL021C	0.40068		YKL091C	0.00674492	down		YDL090C	0.00679818	down		YAL021C	0.971687	-0.045674	0.692797	-0.290382
YAL022C	0.22165		YAL022C	0.780818		YGL160W	0.00677862	down		YPL214C	0.00697372	down		YAL022C	0.623658	0.477393	0.291499	-0.225394
YAL023C	0.326392		YAL023C	0.927201		YLR281C	0.00733492	down		YGL198W	0.00735834	down		YAL023C	1.24834	0.155437	0.349123	-0.195775
YAL024C	0.559087		YAL024C	0.528158		YDL057W	0.00781614	down		YAL064W-B	0.00736169	down		YAL024C	0.793748	-0.028421	-0.073883	0.642137
YAL025C	0.242948		YAL025C	0.177221		YNL194C	0.00818158	down		YKL170W	0.00743305	down		YAL025C	1.30729	0.848335	0.558539	1.52728
YAL026C	0.417415		YAL026C	0.481587		YBR088C	0.00908709	down		YGR224W	0.0075069	down		YAL026C	0.671672	0.214404	0.087624	0.006203
YAL027W	0.31146		YAL027W	0.569263		YIL120W	0.00948874	down		YHR162W	0.0080569	down		YAL027W	-0.150784	0.411043	-0.046009	-0.044898
YAL028W	0.138312		YAL028W	0.425754		YDL170W	0.00960438	down		YKL053C-A	0.00840211	down		YAL028W	-2.01699	-0.198692	-1.28753	-1.69596
YAL029C	0.484924		YAL029C	0.165469		YBR138C	0.00982984	down		YDL188C	0.00852515	down		YAL029C	0.72882	0.112889	0.017263	0.06546
YAL030W	0.599497		YAL030W	0.494521		YDR326C	0.0100591	down		YBR076W	0.00874225	down		YAL030W	-0.057243	-0.009741	0.363276	-1.13185
YAL031C	0.161515		YAL031C	0.704604		YOL083W	0.0102524	down		YMR152W	0.00884113	down		YAL031C	-0.236189	0.194266	-0.138924	-0.583498
YAL032C	0.612408		YAL032C	0.573513		YLR312C	0.0110079	down		YGL226W	0.00945747	down		YAL032C	0.720305	0.027171	-0.128523	-0.234253
YAL033W	0.0181796		YAL033W	0.725746		YGR238C	0.0126685	down		YBL089W	0.00955705	down		YAL033W	0.365392	-0.28799	0.38688	0.777824
YAL034C	0.644224		YAL034C	0.652872		YGR070W	0.0135079	down		YBR258C	0.00965466	down		YAL034C	0.05679	0.126752	-0.246374	-0.031036
YAL034W-A	0.714962		YAL034W-A	0.444788		YER058W	0.0140541	down		YFL010C	0.0102072	down		YAL034W-A	0.092502	0.055202	-0.263458	0.634913
YAL035W	0.221744		YAL035W	0.217892		YPR056W	0.0141307	down		YIL156W	0.0102714	down		YAL035W	0.573166	0.147983	0.267796	0.311796
YAL036C	0.707321		YAL036C	0.0707903		YIL093C	0.0143701	down		YGR008C	0.0105312	down		YAL036C	-0.257627	1.39163	0.762927	1.11207
YAL037C-A	0.494626		YAL037C-A	0.880052		YNL250W	0.0143746	down		YCR107W	0.0106801	down		YAL037C-A	-3.08869	-0.434834	-0.026074	0.639726
YAL037W	0.533881		YAL037W	0.754258		YDR504C	0.0144278	down		YLR192C	0.010937	down		YAL037W	-1.22497	-0.189128	0.065254	0.448095
YAL038W	0.477451		YAL038W	0.969516		YDR468C	0.014667	down		YLR113W	0.0110474	down		YAL038W	0.57698	0.269346	0.020445	-0.29646
YAL039C	0.263431		YAL039C	0.0450024		YER042W	0.01479	down		YJR098C	0.011124	down		YAL039C	0.490936	-0.50957	0.191321	-0.442179
YAL040C	0.599476		YAL040C	0.545303		YDR319C	0.015939	down		YKL219W	0.0114833	down		YAL040C	-1.30308	0.066121	0.205289	-0.927603
YAL041W	0.239257		YAL041W	0.00264637		YDR391C	0.017406	down		YHR022C	0.0115515	down		YAL041W	-0.225368	-0.439643	-0.097838	-0.436003
YAL042W	0.299671		YAL042W	0.583482		YNL136W	0.0174605	down		YDR305C	0.0119091	down		YAL042W	0.738006	0.045448	0.240214	-0.344592
YAL043C	0.00192179		YAL043C	0.888545		YJL088W	0.0175253	down		YER125W	0.012203	down		YAL043C	0.383431	0.182214	0.381123	-0.127441
YAL044C	0.14865		YAL044C	0.355534		YDR253C	0.0179306	down		YOL004W	0.012681	down		YAL044C	0.563908	-0.666585	0.34721	-0.153917
YAL044W-A	0.389586		YAL044W-A	0.00351538		YLR046C	0.0183368	down		YIL031W	0.0127103	down		YAL044W-A	0.059316	-0.134021	0.338564	-0.132549
YAL046C	0.329245		YAL046C	0.157888		YEL057C	0.0186405	down		YKL206C	0.0129962	down		YAL046C	0.297169	0.312405	1.08122	0.524271
YAL047C	0.0581061		YAL047C	0.407064		YDR201W	0.0187492	down		YNL046W	0.0132165	down		YAL047C	-0.118953	0.032649	-0.099004	0.222058
YAL048C	0.592161		YAL048C	0.598271		YHL015W	0.019163	down		YDR071C	0.0136535	down		YAL048C	-1.09917	-0.607748	0.160243	0.094567
YAL049C	0.429708		YAL049C	0.272767		YKL101W	0.0195625	down		YER057C	0.0151524	down		YAL049C	0.128768	-0.283344	0.014276	-0.75982
YAL051W	0.265907		YAL051W	0.712496		YOR031W	0.0199466	down		YJL155C	0.0159208	down		YAL051W	0.198171	0.162175	0.076342	-0.467684
YAL053W	0.312827		YAL053W	0.935771		YMR018W	0.0201667	down		YOR394C-A	0.0159969	down		YAL053W	0.032217	-0.328866	0.106402	0.268402
YAL054C	0.955219		YAL054C	0.859913		YNL157W	0.0204779	down		YCR003W	0.0160522	down		YAL054C	-0.336625	-0.405083	0.387657	0.256996
YAL055W	0.176768		YAL055W	0.238087		YDL157C	0.0206977	down		YIL062C	0.016314	down		YAL055W	-0.507236	-0.22628	-0.282218	-0.518621
YAL056W	0.675699		YAL056W	0.745403		YHL048W	0.0212869	down		YLR155C	0.0168917	down		YAL056W	0.577384	0.181791	-0.163524	-0.448005
YAL058W	0.790211		YAL058W	0.877674		YKL096W	0.0213542	down		YNR071C	0.0168951	down		YAL058W	-0.183193	-0.182916	0.37363	0.123335
YAL059W	0.337337		YAL059W	0.168741		YDR162C	0.0223744	down		YGL010W	0.0186806	down		YAL059W	0.102925	0.735072	0.394016	1.28282
YAL060W	0.999857		YAL060W	0.322463		YKL087C	0.0229917	down		YDR282C	0.0191671	down		YAL060W	0.478619	-0.039685	-0.478404	-0.138596
YAL061W	0.89426		YAL061W	0.30746		YOR220W	0.02365	down		YHR071W	0.0193103	down		YAL061W	0.768827	0.099601	-1.07852	0.31922
YAL062W	0.652787		YAL062W	0.205617		YBL078C	0.024112	down		YJR136C	0.019397	down		YAL062W	0.359967	-0.379375	-1.47097	-0.189104
YAL063C-A	0.411038		YAL063C-A	0.19546		YLR298C	0.0241427	down		YER034W	0.0197138	down		YAL063C-A	-2.41354	-0.635925	-0.339483	-0.329753
YAL063C	0.583653		YAL063C	0.174599		YLR080W	0.0246533	down		YJR138W	0.0197939	down		YAL063C	-1.85174	-0.652398	0.244732	-0.3659
YAL064C-A	0.37914		YAL064C-A	0.00403837		YFL049W	0.0247989	down		YBL080C	0.0199079	down		YAL064C-A	-3.51791	-0.889339	-0.676002	-0.878127
YAL064W-B	0.506407		YAL064W-B	0.00736169		YDR090C	0.0253947	down		YDR116C	0.0199619	down		YAL064W-B	-2.57095	-0.223385	0.025877	-0.228612
YAL064W	0.811252		YAL064W	0.781641		YML023C	0.0260156	down		YBR037C	0.0205082	down		YAL064W	-2.13029	0.497011	1.1333	-0.235442
YAL065C	0.557277		YAL065C	0.0378447		YJR021C	0.0266145	down		YGR240C	0.0213959	down		YAL065C	-1.82241	-0.336255	0.164407	-0.298478
YAL067C	0.704488		YAL067C	0.692383		YML123C	0.0270516	down		YMR030W	0.0214856	down		YAL067C	0.389872	-0.176793	-0.129723	0.567111
YAL067W-A	0.546259		YAL067W-A	0.22173		YFL013C	0.0270771	down		YLR284C	0.0215268	down		YAL067W-A	-3.28987	-0.313253	0.239474	-0.67042
YAL068C	0.566381		YAL068C	0.0692501		YPL096W	0.027424	down		YEL006W	0.0216399	down		YAL068C	-3.05761	-0.703089	0.319982	-0.875483
YAR002C-A	0.220127		YAR002C-A	0.164609		YGR118W	0.0279752	down		YOL117W	0.0222845	down		YAR002C-A	0.460699	0.386373	0.216676	0.224741
YAR002W	0.743519		YAR002W	0.467703		YLR047C	0.0283402	down		YEL049W	0.0224083	down		YAR002W	-0.289454	0.013957	0.116458	0.274872
YAR003W	0.541431		YAR003W	0.925411		YHR096C	0.0285247	down		YPL206C	0.0224358	down		YAR003W	-0.205241	-0.357509	0.013376	0.282212
YAR007C	0.985681		YAR007C	0.273326		YJR076C	0.0286096	down		YER163C	0.0225344	down		YAR007C	0.479538	0.2539	-0.458438	0.682693
YAR008W	0.498785		YAR008W	0.48571		YGL250W	0.0289463	down		YMR275C	0.0226903	down		YAR008W	-0.000302	0.031565	-0.158246	1.40596
YAR009C	0.730793		YAR009C	0.379742		YMR204C	0.0294857	down		YDR402C	0.0229719	down		YAR009C	0.375591	-0.313923	-0.99024	-1.64202
YAR010C	0.526714		YAR010C	0.0886949		YHR036W	0.0298186	down		YDL020C	0.0229968	down		YAR010C	-2.66777	-0.470709	0.112013	-0.624256
YAR014C	0.52364		YAR014C	0.357684		YBR165W	0.0302059	down		YBL005W	0.023114	down		YAR014C	-0.267319	0.074441	0.009931	0.32743
YAR015W	0.908498		YAR015W	0.522935		YFL034W	0.0317225	down		YDR337W	0.0232248	down		YAR015W	0.416347	-0.016441	-0.311069	0.456169
YAR018C	0.298396		YAR018C	0.6723		YLR151C	0.031893	down		YBL039W-A	0.0234783	down		YAR018C	-0.221981	0.634458	-0.072745	-0.176034
YAR019C	0.24723		YAR019C	0.239242		YGL009C	0.0319361	down		YOL086W-A	0.0238317	down		YAR019C	-0.423754	-0.256266	-0.177689	-0.590266
YAR020C	0.491212		YAR020C	0.71586		YMR020W	0.0319513	down		YDR150W	0.0238622	down		YAR020C	-1.56106	0.467152	-0.021551	-1.32453
YAR023C	0.173205		YAR023C	0.959467		YOR020W-A	0.0321321	down		YHL022C	0.0242584	down		YAR023C	-0.910452	0.131746	-0.513256	-0.115954
YAR027W	0.146483		YAR027W	0.245466		YOR058C	0.0328758	down		YHR177W	0.0247835	down		YAR027W	-0.446547	-0.53355	-0.719744	-1.26259
YAR028W	0.54147		YAR028W	0.572814		YGR040W	0.0329242	down		YPR069C	0.024833	down		YAR028W	-0.79805	0.018174	0.052059	-0.158204
YAR029W	0.26114		YAR029W	0.636536		YIL172C	0.032928	down		YDL142C	0.0248776	down		YAR029W	-0.660574	0.102404	-0.260172	-0.470131
YAR031W	0.399355		YAR031W	0.0435834		YOR114W	0.0335732	down		YCL069W	0.0254106	down		YAR031W	-2.28524	-0.845421	-0.364318	-0.969893
YAR033W	0.404855		YAR033W	0.0554298		YGL216W	0.0338561	down		YPL034W	0.0258019	down		YAR033W	-2.25505	-0.912055	-0.339558	-1.08651
YAR035C-A	0.505264		YAR035C-A	0.870989		YDR181C	0.0338881	down		YGR288W	0.0261774	down		YAR035C-A	-3.75713	-0.177514	0.031068	0.117
YAR035W	0.277392		YAR035W	0.31733		YGL154C	0.0345718	down		YDR525W-A	0.0264005	down		YAR035W	0.721888	0.288664	0.263241	0.978253
YAR042W	0.456422		YAR042W	0.560765		YJR014W	0.0346766	down		YLL009C	0.0267434	down		YAR042W	0.910156	0.815274	0.062399	-0.078055
YAR050W	0.162226		YAR050W	0.368965		YPL166W	0.0350279	down		YDR089W	0.0271558	down		YAR050W	-0.28439	-0.29521	-0.484738	-1.41393
YAR064W	0.645666		YAR064W	0.398423		YCR021C	0.0352501	down		YDR059C	0.0274767	down		YAR064W	-1.60006	1.25136	0.372638	0.201374
YAR066W	0.538838		YAR066W	0.208077		YNL159C	0.0353031	down		YBR014C	0.0275434	down		YAR066W	-3.36722	-0.074548	0.205676	-0.151015
YAR068W	0.519263		YAR068W	0.269273		YMR029C	0.0353569	down		YJL037W	0.0286055	down		YAR068W	-2.00601	-0.218925	0.060717	-0.577372
YAR071W	0.655116		YAR071W	0.0727751		YFR003C	0.0353763	down		YBR157C	0.0287169	down		YAR071W	-1.45213	-0.282832	0.360992	-0.224574
YAR073W	0.525493		YAR073W	0.133286		YPL264C	0.0353771	down		YDL147W	0.0287485	down		YAR073W	1.91311	-0.235596	-0.07665	-0.362727
YAR075W	0.435405		YAR075W	0.427594		YBR146W	0.0359041	down		YHR157W	0.0289545	down		YAR075W	0.455481	0.265705	0.046375	0.030351
YBL001C	0.624154		YBL001C	0.127369		YNL246W	0.036179	down		YDR138W	0.0290875	down		YBL001C	-0.31684	-0.379714	0.062586	-0.572885
YBL002W	0.470265		YBL002W	0.148446		YER078C	0.0363819	down		YHR037W	0.0301637	down		YBL002W	0.260835	0.315954	0.012192	0.194679
YBL003C	0.91022		YBL003C	0.536968		YIL144W	0.0366357	down		YNL098C	0.030364	down		YBL003C	0.18888	-0.212076	-0.141917	0.012329
YBL004W	0.438684		YBL004W	0.0307589		YPL164C	0.0371418	down		YHR212W-A	0.031322	down		YBL004W	1.09492	0.57562	0.105784	0.522521
YBL005W-A	0.589742		YBL005W-A	0.191686		YNL259C	0.0391844	down		YJL062W-A	0.0315876	down		YBL005W-A	-2.72523	-0.760606	0.386732	-0.400145
YBL005W	0.393866		YBL005W	0.023114		YDR146C	0.0393017	down		YDL077C	0.0316144	down		YBL005W	-0.36548	-4.65647	-0.061502	-4.33005
YBL006C	0.537772		YBL006C	0.0433228		YOR020C	0.0401408	down		YOR035C	0.0326848	down		YBL006C	0.745533	-0.130384	-0.044286	-0.149457
YBL007C	0.402142		YBL007C	0.979416		YOR103C	0.0402352	down		YOR222W	0.032711	down		YBL007C	1.19171	0.615871	0.184639	-0.57728
YBL008W-A	0.665789		YBL008W-A	0.949139		YDR337W	0.0403048	down		YKL100C	0.0335625	down		YBL008W-A	-1.6507	-0.458216	0.439864	0.537973
YBL008W	0.476032		YBL008W	0.969209		YPL161C	0.0407281	down		YJL001W	0.0342152	down		YBL008W	0.00958	-0.328478	0.254338	0.298147
YBL009W	0.322225		YBL009W	0.626447		YDR228C	0.0407462	down		YJR102C	0.034399	down		YBL009W	-0.366731	-0.262691	-0.105157	1.30513
YBL010C	0.37503		YBL010C	0.655629		YDL149W	0.0414498	down		YOR291W	0.0348418	down		YBL010C	-0.956599	-0.482894	-0.190233	0.120458
YBL011W	0.457959		YBL011W	0.878196		YPL200W	0.0414892	down		YPL254W	0.0349169	down		YBL011W	0.437234	0.266963	0.028916	-0.395228
YBL013W	0.177965		YBL013W	0.788071		YGL080W	0.0416803	down		YNL033W	0.0356043	down		YBL013W	-0.995467	0.240817	-0.551414	-0.495363
YBL014C	0.228746		YBL014C	0.0138737		YPL223C	0.0420786	down		YPL119C	0.03567	down		YBL014C	0.842443	0.487267	0.382377	0.466479
YBL015W	0.562098		YBL015W	0.319038		YOL025W	0.0421548	down		YDR055W	0.0361048	down		YBL015W	0.246049	0.467459	-0.024077	0.136576
YBL016W	0.367306		YBL016W	0.101272		YGL044C	0.0423367	down		YEL005C	0.0363988	down		YBL016W	-1.92662	-0.241429	-0.407494	-0.333699
YBL017C	0.627556		YBL017C	0.575566		YLR053C	0.0423772	down		YDR034W-B	0.0365573	down		YBL017C	0.358491	0.100934	-0.072806	-0.846336
YBL018C	0.9051		YBL018C	0.308542		YKL084W	0.0424981	down		YAL009W	0.0368214	down		YBL018C	0.221378	0.249076	-0.299623	0.803086
YBL019W	0.315312		YBL019W	0.692298		YPL236C	0.0425146	down		YIL102C	0.0376964	down		YBL019W	-0.69805	0.14847	-0.208389	-0.476483
YBL020W	0.100796		YBL020W	0.0726486		YBR043C	0.0427552	down		YAL065C	0.0378447	down		YBL020W	0.11618	0.310824	0.084188	0.391297
YBL021C	0.149782		YBL021C	0.445596		YPL083C	0.0428524	down		YKL190W	0.0379532	down		YBL021C	0.852533	0.050907	0.522834	0.594249
YBL022C	0.45117		YBL022C	0.385039		YKL217W	0.0428776	down		YBL111C	0.0381368	down		YBL022C	0.49878	-0.202822	0.038333	-1.11093
YBL023C	0.313095		YBL023C	0.476267		YOL069W	0.0445882	down		YOR132W	0.0391765	down		YBL023C	-0.031717	-0.023558	-0.10491	-0.631628
YBL024W	0.962099		YBL024W	0.136418		YBR210W	0.0449466	down		YOL032W	0.0397614	down		YBL024W	-0.361398	0.897172	0.320739	0.576469
YBL025W	0.322341		YBL025W	0.833522		YDR317W	0.0451313	down		YPL036W	0.0398303	down		YBL025W	-0.33545	-0.726551	-0.096121	0.419761
YBL026W	0.253282		YBL026W	0.704671		YBR236C	0.0454065	down		YGR171C	0.0398583	down		YBL026W	-0.462288	-0.146677	-0.1887	0.048851
YBL027W	0.767604		YBL027W	0.815423		YFL056C	0.0464648	down		YBL041W	0.0401132	down		YBL027W	-0.062889	-0.244609	0.028111	0.132194
YBL028C	0.8752		YBL028C	0.0850446		YHL014C	0.0468298	down		YIL105C	0.040752	down		YBL028C	-0.726558	0.681388	0.4858	0.892962
YBL029C-A	0.0995814		YBL029C-A	0.208274		YDL115C	0.0474276	down		YOR002W	0.0407983	down		YBL029C-A	-0.430295	-0.480836	-0.591432	-0.97481
YBL029W	0.292649		YBL029W	0.50528		YOL081W	0.0474906	down		YLR170C	0.0408007	down		YBL029W	-1.54358	0.009803	-0.521319	-1.18189
YBL030C	0.0541395		YBL030C	0.5805		YMR251W	0.047554	down		YOL159C-A	0.0408728	down		YBL030C	0.234197	0.010309	0.197404	-0.081092
YBL031W	0.463628		YBL031W	0.855177		YOR023C	0.0476527	down		YOR358W	0.0414683	down		YBL031W	-1.59752	-0.472919	-0.091371	0.757832
YBL032W	0.193764		YBL032W	0.551483		YDL017W	0.0477452	down		YNL250W	0.0415688	down		YBL032W	0.857674	-0.056303	0.447643	0.694698
YBL033C	0.249349		YBL033C	0.278507		YNL038W	0.0481159	down		YFL020C	0.0416233	down		YBL033C	1.03891	0.49835	0.431575	0.180738
YBL034C	0.280331		YBL034C	0.860555		YKR091W	0.0482274	down		YJL058C	0.0421062	down		YBL034C	-0.175097	-0.438931	-0.062936	0.279091
YBL035C	0.79288		YBL035C	0.345243		YER048W-A	0.0482862	down		YER010C	0.0428138	down		YBL035C	0.211751	0.225469	-0.427333	0.909166
YBL036C	0.538887		YBL036C	0.155637		YJR096W	0.0483765	down		YGR154C	0.0429716	down		YBL036C	0.608168	0.087061	-0.037195	0.144936
YBL037W	0.342706		YBL037W	0.330147		YPL116W	0.0483804	down		YBL006C	0.0433228	down		YBL037W	0.233743	-0.021726	0.058957	-0.079489
YBL038W	0.650876		YBL038W	0.430518		YPR082C	4.82872e-05	up		YEL020W-A	0.0434173	down		YBL038W	0.077108	-0.683162	-0.319243	-0.074859
YBL039C	0.171988		YBL039C	0.130834		YLR185W	0.000916367	up		YAR031W	0.0435834	down		YBL039C	1.15239	0.85158	0.652552	1.30011
YBL039W-A	0.166783		YBL039W-A	0.0234783		YER183C	0.00148363	up		YEL070W	0.0445804	down		YBL039W-A	-1.36292	-1.42333	-0.786551	-1.53238
YBL040C	0.269988		YBL040C	0.35272		YAL043C	0.00192179	up		YDR155C	0.0446293	down		YBL040C	-0.3091	-0.745776	-0.116806	-0.175678
YBL041W	0.666775		YBL041W	0.0401132		YEL007W	0.00211951	up		YGR253C	0.0449064	down		YBL041W	0.240237	-0.384035	-0.064415	-0.338451
YBL042C	0.421433		YBL042C	0.141821		YJR140C	0.00216553	up		YOR201C	0.0449238	down		YBL042C	0.198753	1.25061	1.60229	1.98315
YBL043W	0.621793		YBL043W	0.512376		YOL041C	0.00258535	up		YAL039C	0.0450024	down		YBL043W	1.0149	0.620244	-0.196567	-0.012059
YBL044W	0.534937		YBL044W	0.627419		YOR271C	0.00287887	up		YGL009C	0.0452601	down		YBL044W	-2.29929	-0.421594	0.126308	0.085527
YBL045C	0.20203		YBL045C	0.146297		YDR454C	0.0030156	up		YNL147W	0.0454359	down		YBL045C	0.333131	0.294449	0.658992	0.474283
YBL046W	0.571869		YBL046W	0.167255		YNL002C	0.00339574	up		YGL162W	0.0456495	down		YBL046W	0.496609	0.96547	-0.056302	0.556226
YBL047C	0.578692		YBL047C	0.781594		YCR057C	0.00350656	up		YPL070W	0.0467266	down		YBL047C	0.504369	0.4101	-0.062664	-0.865873
YBL049W	0.393253		YBL049W	0.261207		YBR133C	0.00389522	up		YGR238C	0.0469096	down		YBL049W	-1.41748	-0.952282	-0.239932	-0.374949
YBL050W	0.69403		YBL050W	0.377154		YKR092C	0.0060728	up		YKR103W	0.0471529	down		YBL050W	0.883258	-0.11442	-0.277858	-0.585577
YBL051C	0.905339		YBL051C	0.466859		YMR012W	0.00642968	up		YDL046W	0.0480208	down		YBL051C	-0.534999	0.134135	0.395597	0.006989
YBL052C	0.0878606		YBL052C	0.0750447		YDL060W	0.00667382	up		YGR273C	0.0489733	down		YBL052C	0.15354	0.409201	0.11609	0.519144
YBL054W	0.918595		YBL054W	0.462945		YPL262W	0.00681738	up		YDR258C	0.0491899	down		YBL054W	-0.547027	0.111327	0.708445	1.91046
YBL055C	0.567283		YBL055C	0.573738		YLR094C	0.00691409	up		YLL063C	0.0492197	down		YBL055C	-0.751839	-0.070675	0.079758	0.607445
YBL056W	0.671529		YBL056W	0.583487		YNL132W	0.00695026	up		YER129W	0.00016478	up		YBL056W	0.692624	0.757391	-0.19127	-0.099899
YBL057C	0.787038		YBL057C	0.501247		YDL227C	0.00723731	up		YOL061W	0.000298267	up		YBL057C	-0.143606	-0.65128	0.296622	0.001276
YBL058W	0.885558		YBL058W	0.697253		YDR155C	0.00731642	up		YJL024C	0.000477562	up		YBL058W	0.712296	0.204206	-0.493221	-0.637833
YBL059C-A	0.220145		YBL059C-A	0.390152		YNL168C	0.0083764	up		YLR106C	0.00101589	up		YBL059C-A	-0.302512	-0.839042	-0.142267	-0.14623
YBL059W	0.776206		YBL059W	0.575451		YIL157C	0.00860789	up		YNL117W	0.00116301	up		YBL059W	-0.08273	-0.035868	0.178565	0.30122
YBL060W	0.324169		YBL060W	0.981852		YOR126C	0.00865772	up		YFR009W	0.00131742	up		YBL060W	-0.493906	0.047324	-0.139992	-0.050102
YBL061C	0.911646		YBL061C	0.401764		YER113C	0.0093693	up		YNL268W	0.00172629	up		YBL061C	0.191974	0.692225	-0.144916	0.107672
YBL063W	0.194344		YBL063W	0.700971		YJR032W	0.00943656	up		YOR147W	0.00183915	up		YBL063W	-0.790318	-0.213527	-0.411572	0.653775
YBL064C	0.119307		YBL064C	0.109277		YDR514C	0.00975007	up		YDR259C	0.00366197	up		YBL064C	0.358003	-0.610395	0.243869	-0.866411
YBL066C	0.0378324		YBL066C	0.427385		YML029W	0.00983278	up		YDL006W	0.00388229	up		YBL066C	0.486904	0.056209	0.548508	0.490649
YBL067C	0.466592		YBL067C	0.411114		YDL063C	0.0101653	up		YKL006C-A	0.00408392	up		YBL067C	1.06618	0.42562	0.056002	0.059815
YBL068W	0.0578611		YBL068W	0.278344		YJR005C-A	0.0107769	up		YNL108C	0.00421702	up		YBL068W	0.520996	0.214805	0.433962	0.59181
YBL069W	0.353263		YBL069W	0.718379		YLR264W	0.0109385	up		YOL022C	0.00477099	up		YBL069W	0.330666	-0.45616	1.4091	1.27723
YBL071C-B	0.555431		YBL071C-B	0.497061		YHR034C	0.0113946	up		YJL076W	0.00486787	up		YBL071C-B	-2.15644	-0.259676	0.18824	-0.001199
YBL071W-A	0.257554		YBL071W-A	0.969007		YOL164W	0.0115299	up		YKL216W	0.00491704	up		YBL071W-A	0.135117	-0.816822	0.337472	0.740924
YBL072C	0.139467		YBL072C	0.861559		YPR025C	0.012045	up		YHR147C	0.00500329	up		YBL072C	-0.113244	-0.705808	-0.072	0.450348
YBL074C	0.428201		YBL074C	0.324259		YGL139W	0.0121007	up		YHR214C-D	0.0050868	up		YBL074C	-1.72193	-0.167603	-0.195031	-0.59164
YBL075C	0.474093		YBL075C	0.137129		YDL167C	0.0124374	up		YLR342W-A	0.00572673	up		YBL075C	-0.04317	0.364599	-1.06023	0.568829
YBL076C	0.576942		YBL076C	0.696219		YOR056C	0.0125881	up		YOR310C	0.00587587	up		YBL076C	0.518509	-0.224063	-0.062974	0.071334
YBL078C	0.024112		YBL078C	0.995407		YOR196C	0.0126446	up		YKR037C	0.00587829	up		YBL078C	-0.887751	0.68496	-0.822928	-0.675148
YBL079W	0.698473		YBL079W	0.554278		YLR407W	0.0127501	up		YGR245C	0.00607605	up		YBL079W	0.390815	-0.162038	-0.125948	0.013849
YBL080C	0.167105		YBL080C	0.0199079		YMR131C	0.0136949	up		YPL146C	0.00668	up		YBL080C	-0.62467	-0.532647	-0.36008	-0.567047
YBL081W	0.421853		YBL081W	0.508662		YFL007W	0.0136974	up		YIL022W	0.00683711	up		YBL081W	0.146084	-0.016141	1.18408	1.18624
YBL082C	0.518269		YBL082C	0.420982		YNR046W	0.0136976	up		YGL086W	0.00738041	up		YBL082C	1.02927	0.068131	-0.029545	0.546082
YBL084C	0.470697		YBL084C	0.423967		YHR127W	0.0137977	up		YOR098C	0.00779536	up		YBL084C	0.008747	0.028226	0.1899	0.23521
YBL085W	0.139252		YBL085W	0.00826285		YPR125W	0.0139479	up		YIL018W	0.00792061	up		YBL085W	0.332564	0.344086	0.2116	0.335268
YBL086C	0.135876		YBL086C	0.93321		YBR079C	0.0142694	up		YOL011W	0.00813418	up		YBL086C	-0.655729	-0.113673	-1.01862	0.092014
YBL087C	0.362806		YBL087C	0.98036		YGL143C	0.0142787	up		YBL085W	0.00826285	up		YBL087C	0.063513	-0.627438	0.290141	0.667396
YBL088C	0.581972		YBL088C	0.999849		YGL063W	0.0145297	up		YDR298C	0.00920557	up		YBL088C	0.87058	0.337885	-0.11272	-0.337725
YBL089W	0.224027		YBL089W	0.00955705		YOL077C	0.01553	up		YJL115W	0.00929863	up		YBL089W	-0.52509	-0.288411	-0.243044	-0.297203
YBL090W	0.441264		YBL090W	0.559287		YDR047W	0.0158102	up		YDL159W	0.00974944	up		YBL090W	-0.37192	-0.525844	-0.034412	0.049113
YBL091C-A	0.18774		YBL091C-A	0.36736		YGL200C	0.0167783	up		YGR272C	0.0098489	up		YBL091C-A	-0.360369	-0.213809	-0.674815	-1.01131
YBL091C	0.467545		YBL091C	0.937535		YPL043W	0.0168277	up		YCL005W	0.0100373	up		YBL091C	1.0411	0.345963	0.053122	-0.283956
YBL092W	0.374943		YBL092W	0.820134		YPL157W	0.0178899	up		YLR359W	0.0103691	up		YBL092W	-0.294862	-0.357479	-0.058679	0.196624
YBL093C	0.699165		YBL093C	0.658941		YDR471W	0.0181433	up		YDR428C	0.0105484	up		YBL093C	-0.291186	-0.284026	0.09419	0.072422
YBL095W	0.265209		YBL095W	0.789201		YAL033W	0.0181796	up		YCR037C	0.0111618	up		YBL095W	-0.609231	0.130341	-0.235464	-0.266906
YBL097W	0.444908		YBL097W	0.247779		YOL010W	0.0183487	up		YDR507C	0.0113832	up		YBL097W	-2.27929	0.047446	-0.197741	0.113424
YBL098W	0.934209		YBL098W	0.282018		YNL056W	0.0184356	up		YGL038C	0.0118997	up		YBL098W	0.440029	0.164471	-0.357332	0.058625
YBL099W	0.117016		YBL099W	0.692057		YER126C	0.0185592	up		YOL072W	0.0119364	up		YBL099W	0.111197	0.356964	0.161983	-0.11108
YBL101C	0.85285		YBL101C	0.367693		YER158C	0.0206888	up		YNL209W	0.0125733	up		YBL101C	0.280072	-0.337404	-0.452477	-1.60004
YBL101W-A	0.783466		YBL101W-A	0.260686		YLR017W	0.0208934	up		YBR215W	0.0126409	up		YBL101W-A	-3.051	-0.471498	1.45604	-1.19463
YBL101W-B	0.920139		YBL101W-B	0.296614		YOR095C	0.020921	up		YBL014C	0.0138737	up		YBL101W-B	-0.180367	-0.425884	0.13997	-1.2874
YBL101W-C	0.468865		YBL101W-C	0.151558		YHR123W	0.0214398	up		YGL023C	0.0139468	up		YBL101W-C	-1.33737	-0.278313	-0.065459	-0.169615
YBL102W	0.384602		YBL102W	0.190335		YCR027C	0.0226868	up		YNL153C	0.0141584	up		YBL102W	-0.109811	-0.234342	-0.599149	-0.443159
YBL103C	0.625187		YBL103C	0.229257		YKL051W	0.0231384	up		YDL141W	0.0144666	up		YBL103C	0.085313	-0.875221	-0.428239	-0.396408
YBL104C	0.345449		YBL104C	0.565589		YGL210W	0.0234289	up		YNL082W	0.0146109	up		YBL104C	0.537593	0.298616	0.133136	-0.030875
YBL105C	0.698818		YBL105C	0.94253		YER163C	0.0237917	up		YCR043C	0.0149326	up		YBL105C	0.6811	0.226398	-0.219906	-0.271464
YBL106C	0.154857		YBL106C	0.598883		YHR089C	0.0246288	up		YML104C	0.0159189	up		YBL106C	0.733174	0.629396	0.441631	-0.098555
YBL107C	0.621139		YBL107C	0.858771		YNL112W	0.0247571	up		YCL045C	0.0160017	up		YBL107C	-0.082702	0.054732	0.429364	-0.034586
YBL108C-A	0.584762		YBL108C-A	0.658616		YNL175C	0.0255206	up		YKR004C	0.0165928	up		YBL108C-A	-3.1144	-0.310608	0.417132	0.079031
YBL111C	0.532813		YBL111C	0.0381368		YIL067C	0.0255924	up		YDR111C	0.0169591	up		YBL111C	-2.74006	-0.280286	0.141356	-0.248567
YBL112C	0.519184		YBL112C	0.405719		YBR021W	0.0262569	up		YKR069W	0.0172612	up		YBL112C	-2.60796	-0.817241	0.078614	-0.121923
YBL113C	0.620241		YBL113C	0.444355		YKL019W	0.0263151	up		YGL028C	0.0179884	up		YBL113C	0.049656	-0.052159	-0.259772	-0.595218
YBR001C	0.631813		YBR001C	0.114778		YLR337C	0.0263613	up		YLL012W	0.0182143	up		YBR001C	1.14017	-0.107795	-0.239507	-0.15585
YBR002C	0.0600542		YBR002C	0.455173		YHR172W	0.026887	up		YOR063W	0.0184004	up		YBR002C	0.910306	0.049623	0.75294	0.703564
YBR003W	0.818207		YBR003W	0.156166		YPL085W	0.0274773	up		YNL262W	0.0187808	up		YBR003W	0.063368	-0.42997	-0.116039	-0.717146
YBR004C	0.420951		YBR004C	0.760651		YDR299W	0.0274782	up		YDR333C	0.0193984	up		YBR004C	-0.4961	0.203013	-0.061919	-0.467823
YBR005W	0.795291		YBR005W	0.921303		YLR413W	0.0280892	up		YPR101W	0.0198342	up		YBR005W	0.640216	1.48197	-0.320263	-1.1544
YBR006W	0.667631		YBR006W	0.52198		YOL005C	0.0281567	up		YKR055W	0.0204888	up		YBR006W	0.082073	0.033836	-0.304456	-0.979644
YBR007C	0.870385		YBR007C	0.120753		YDL138W	0.0282075	up		YKL057C	0.0219533	up		YBR007C	0.564043	0.109973	-0.370996	0.162233
YBR008C	0.468874		YBR008C	0.989919		YCL005W	0.0283608	up		YOR251C	0.0220299	up		YBR008C	-0.447644	0.269497	-0.021904	-0.261094
YBR009C	0.177615		YBR009C	0.931806		YBR135W	0.0286105	up		YPR183W	0.0228782	up		YBR009C	-0.402563	-0.012935	-0.223279	0.016052
YBR010W	0.00539263		YBR010W	0.0976095		YNL248C	0.0289327	up		YKL050C	0.0230575	up		YBR010W	-0.261376	0.039366	-0.256985	0.053757
YBR011C	0.505133		YBR011C	0.149069		YBR039W	0.0290057	up		YHR086W	0.023685	up		YBR011C	0.321817	-0.071581	-0.002595	-0.116427
YBR013C	0.137146		YBR013C	0.512702		YGL221C	0.0295037	up		YNL227C	0.0238221	up		YBR013C	0.322385	-1.09621	0.206625	0.021874
YBR014C	0.514183		YBR014C	0.0275434		YFL023W	0.0303163	up		YJR072C	0.0246477	up		YBR014C	0.006141	-0.613029	-0.275604	-0.562153
YBR015C	0.296245		YBR015C	0.611961		YNL065W	0.0310523	up		YPL210C	0.0247476	up		YBR015C	0.554231	-0.096505	0.183702	0.543065
YBR016W	0.815406		YBR016W	0.849688		YDR091C	0.0316348	up		YJL055W	0.0250166	up		YBR016W	-0.556153	0.660591	0.300542	-1.07917
YBR017C	0.896817		YBR017C	0.621425		YHR108W	0.0319318	up		YHR030C	0.0253047	up		YBR017C	-0.124925	0.018038	0.173765	-0.093422
YBR018C	0.628108		YBR018C	0.80175		YML081W	0.0321618	up		YOR371C	0.0253737	up		YBR018C	-2.46584	-0.062231	0.503014	0.031924
YBR019C	0.544524		YBR019C	0.493281		YDR101C	0.0326355	up		YPL122C	0.0268205	up		YBR019C	-1.83362	-0.930402	0.128449	-0.00982
YBR020W	0.695456		YBR020W	0.761659		YGR187C	0.0332672	up		YER137C	0.0269251	up		YBR020W	-1.05861	0.946044	0.335628	-0.41232
YBR021W	0.0262569		YBR021W	0.359858		YIL169C	0.0336876	up		YOL125W	0.0275718	up		YBR021W	0.598518	0.290386	0.551077	1.29775
YBR022W	0.834055		YBR022W	0.630692		YKR025W	0.0342794	up		YLR451W	0.027644	up		YBR022W	0.13895	-0.416907	-0.080433	0.08681
YBR023C	0.433249		YBR023C	0.736298		YDR508C	0.0344658	up		YBR275C	0.0286799	up		YBR023C	0.546051	-0.132869	0.057465	0.341375
YBR024W	0.36389		YBR024W	0.992368		YJL198W	0.034574	up		YPL131W	0.0293761	up		YBR024W	-0.707264	1.1194	-0.153561	-1.14657
YBR025C	0.753368		YBR025C	0.222763		YPL094C	0.0351806	up		YLR181C	0.0297666	up		YBR025C	0.334064	0.191685	-0.140449	0.089186
YBR026C	0.478881		YBR026C	0.521748		YMR056C	0.0355019	up		YLR224W	0.0298175	up		YBR026C	0.645461	0.061378	0.02142	-1.79603
YBR028C	0.25439		YBR028C	0.14151		YPR022C	0.03577	up		YGL120C	0.0300431	up		YBR028C	0.471935	0.133001	0.19168	0.210679
YBR029C	0.719017		YBR029C	0.619421		YDR178W	0.0358614	up		YBL004W	0.0307589	up		YBR029C	0.36541	-0.132385	-0.130919	0.697434
YBR030W	0.348819		YBR030W	0.091332		YIL162W	0.0359066	up		YPR033C	0.0315737	up		YBR030W	-0.168004	0.528538	-0.040664	0.395111
YBR031W	0.364196		YBR031W	0.038032		YPR063C	0.0370538	up		YPR135W	0.0320517	up		YBR031W	0.823248	0.23562	0.178329	0.209025
YBR033W	0.467179		YBR033W	0.300819		YBL066C	0.0378324	up		YOR231W	0.0340361	up		YBR033W	-0.016284	-0.159898	-0.31558	-0.494277
YBR034C	0.152676		YBR034C	0.585015		YDL055C	0.0387313	up		YJR137C	0.0348419	up		YBR034C	0.547707	-0.200542	0.902268	1.49278
YBR035C	0.623445		YBR035C	0.127028		YLR244C	0.0387743	up		YOR115C	0.0352056	up		YBR035C	0.070341	-0.314323	-0.358197	-0.473678
YBR036C	0.608942		YBR036C	0.946673		YOR340C	0.0389067	up		YPR084W	0.0376478	up		YBR036C	1.29543	0.368665	-0.223871	-0.311552
YBR037C	0.0743211		YBR037C	0.0205082		YDR429C	0.0391242	up		YGR208W	0.0376627	up		YBR037C	-0.276796	-0.588657	-0.350345	-0.551902
YBR038W	0.576081		YBR038W	0.283415		YFL030W	0.0394204	up		YPL170W	0.0377513	up		YBR038W	0.897706	-0.052427	-0.107796	-0.14811
YBR039W	0.0290057		YBR039W	0.577326		YDL031W	0.0401757	up		YDR267C	0.0380241	up		YBR039W	0.244201	-0.493454	0.222904	0.060233
YBR040W	0.610048		YBR040W	0.914044		YJL026W	0.0408186	up		YBR031W	0.038032	up		YBR040W	-2.40284	-0.615438	0.41955	0.468227
YBR041W	0.57702		YBR041W	0.63846		YGR200C	0.0430814	up		YMR227C	0.0384337	up		YBR041W	-0.163099	-0.00668	0.019829	0.030228
YBR042C	0.281671		YBR042C	0.126138		YDR492W	0.0435862	up		YOL066C	0.0384434	up		YBR042C	-0.385891	0.430336	-0.137786	0.646542
YBR043C	0.0427552		YBR043C	0.220887		YLR143W	0.0442904	up		YDR068W	0.0390707	up		YBR043C	-4.69293	-0.351465	-5.36975	-0.749609
YBR044C	0.635981		YBR044C	0.210821		YMR049C	0.0445622	up		YER165W	0.0391053	up		YBR044C	0.065895	-0.23815	-0.303793	-0.487715
YBR045C	0.624404		YBR045C	0.432284		YGL126W	0.0451329	up		YGR251W	0.0392049	up		YBR045C	-1.40495	-0.514298	0.278096	-0.054912
YBR046C	0.868161		YBR046C	0.618409		YNL166C	0.0455919	up		YDL013W	0.0394594	up		YBR046C	1.04866	0.247677	-0.684516	-1.31623
YBR047W	0.0989613		YBR047W	0.485934		YJL125C	0.0463034	up		YOR039W	0.0409766	up		YBR047W	-0.840455	-0.048183	-1.15283	-2.18041
YBR048W	0.235252		YBR048W	0.754728		YDR420W	0.0464496	up		YDR289C	0.0415716	up		YBR048W	-0.114643	-0.484656	-0.050629	0.204981
YBR049C	0.663322		YBR049C	0.626457		YMR266W	0.0469715	up		YBR153W	0.0419353	up		YBR049C	0.157693	-0.639384	-0.041367	0.128703
YBR050C	0.198405		YBR050C	0.340499		YIL043C	0.0470294	up		YOR207C	0.0421433	up		YBR050C	-1.17827	0.214504	-0.604083	0.838167
YBR052C	0.687563		YBR052C	0.47434		YDR430C	0.0475594	up		YOR065W	0.0422805	up		YBR052C	0.137496	-0.0575	-0.453103	-1.42581
YBR053C	0.291616		YBR053C	0.273383		YLR087C	0.0478643	up		YKL089W	0.0422962	up		YBR053C	-0.219466	-0.5513	-0.074518	-1.48276
YBR054W	0.997794		YBR054W	0.376307		YDR033W	0.0479402	up		YIR009W	0.0423994	up		YBR054W	-0.893086	-0.906598	0.899296	-0.1784
YBR055C	0.590292		YBR055C	0.522685		YDR044W	0.0481182	up		YMR241W	0.0445882	up		YBR055C	-0.109981	0.279231	0.015704	-0.009954
YBR056W-A	0.664911		YBR056W-A	0.850189		YLL012W	0.0485594	up		YJL026W	0.0448462	up		YBR056W-A	0.672579	0.496749	-0.17823	-0.810082
YBR056W	0.448134		YBR056W	0.461735		YHR128W	0.0495213	up		YNL165W	0.0450477	up		YBR056W	-0.040469	-0.118936	-0.495631	-1.97636
YBR057C	0.438519		YBR057C	0.211363		YNL023C	0.0497196	up		YDR121W	0.0453993	up		YBR057C	-0.459527	0.572903	-0.044517	0.279143
YBR058C-A	0.432512		YBR058C-A	0.846675		YLR204W	0.0499713	up		YNL206C	0.0457759	up		YBR058C-A	-0.022475	-0.561838	-0.211215	0.340271
YBR058C	0.746552		YBR058C	0.277102						YDL178W	0.0458003	up		YBR058C	0.048824	0.439784	-0.119701	0.160597
YBR059C	0.678607		YBR059C	0.385483						YNL176C	0.046532	up		YBR059C	0.13052	-0.182534	-0.03761	-1.00377
YBR060C	0.209362		YBR060C	0.180918						YER187W	0.0467669	up		YBR060C	0.59804	0.308812	0.29372	0.563651
YBR061C	0.0950149		YBR061C	0.868272						YDR145W	0.0480215	up		YBR061C	0.36571	-0.659267	0.495156	1.0096
YBR062C	0.0904846		YBR062C	0.428061						YER018C	0.0484746	up		YBR062C	-0.650657	-0.098624	-0.487753	-0.869049
YBR063C	0.676734		YBR063C	0.579806						YMR269W	0.0493096	up		YBR063C	-0.54153	-1.13009	0.154321	0.142413
YBR065C	0.486715		YBR065C	0.800878						YGR252W	0.0493534	up		YBR065C	-1.8624	-0.214557	-0.03887	0.41966
YBR066C	0.5078		YBR066C	0.492899										YBR066C	-0.389031	-0.028463	0.004767	-2.55159
YBR067C	0.708388		YBR067C	0.468083										YBR067C	-0.121172	-0.084743	0.35686	-1.68886
YBR068C	0.842744		YBR068C	0.481706										YBR068C	0.786887	-0.063634	-1.31756	-2.21386
YBR069C	0.370938		YBR069C	0.854705										YBR069C	0.26616	-0.488748	1.29484	0.78449
YBR070C	0.176914		YBR070C	0.797845										YBR070C	-0.130927	-0.30078	-0.235445	0.595286
YBR071W	0.841339		YBR071W	0.713106										YBR071W	0.351743	-0.305795	-0.591919	0.879134
YBR072C-A	0.443951		YBR072C-A	0.5										YBR072C-A	-2.57467	-0.38233	-0.227265	0
YBR072W	0.360866		YBR072W	0.693015										YBR072W	-0.368332	-0.452233	-1.65841	0.141473
YBR073W	0.0891297		YBR073W	0.222965										YBR073W	-0.135149	0.374592	-0.17949	0.805767
YBR074W	0.507984		YBR074W	0.299271										YBR074W	0.360653	0.115857	-0.004523	0.037791
YBR076W	0.288299		YBR076W	0.00874225										YBR076W	-2.80221	-0.604946	-0.967781	-0.621793
YBR077C	0.630222		YBR077C	0.582781										YBR077C	0.100855	0.081651	-0.486158	-0.624387
YBR078W	0.819034		YBR078W	0.869314										YBR078W	0.316943	-0.290691	-0.173615	0.1905
YBR079C	0.0142694		YBR079C	0.36474										YBR079C	0.396167	0.088501	0.414337	0.410254
YBR080C	0.603084		YBR080C	0.757035										YBR080C	0.349205	0.24663	-0.057044	-0.577291
YBR081C	0.627102		YBR081C	0.804155										YBR081C	0.653407	0.372665	-0.132215	-0.192956
YBR082C	0.193265		YBR082C	0.253608										YBR082C	-0.463655	-0.816541	-0.242456	-0.332813
YBR083W	0.755828		YBR083W	0.191635										YBR083W	-0.665762	-0.029766	0.282935	-0.056569
YBR084C-A	0.265223		YBR084C-A	0.243326										YBR084C-A	0.319465	0.182422	0.123463	0.427669
YBR084W	0.118276		YBR084W	0.399916										YBR084W	0.531051	0.167831	0.363008	1.05874
YBR085C-A	0.297027		YBR085C-A	0.0880271										YBR085C-A	-0.239068	-0.304812	-0.078914	-0.403362
YBR085W	0.740304		YBR085W	0.248282										YBR085W	-1.50927	0.645355	0.598398	0.269357
YBR086C	0.532659		YBR086C	0.051938										YBR086C	0.34552	-0.241211	-0.017741	-0.204747
YBR087W	0.49105		YBR087W	0.434863										YBR087W	0.476055	0.081383	0.006693	0.792621
YBR088C	0.00908709		YBR088C	0.643072										YBR088C	-0.271585	-0.278933	-0.279451	1.22019
YBR089C-A	0.701613		YBR089C-A	0.0877032										YBR089C-A	0.0870013	-0.246188	-0.265472	-0.325439
YBR090C	0.994077		YBR090C	0.591324										YBR090C	0.144778	0.054299	-0.142109	-0.375919
YBR091C	0.699419		YBR091C	0.756382										YBR091C	-0.183358	-0.248644	0.566076	0.583661
YBR092C	0.81089		YBR092C	0.775413										YBR092C	-1.007	-0.310503	0.534981	0.672386
YBR093C	0.446495		YBR093C	0.0634843										YBR093C	-1.39733	-0.398905	-0.117717	-0.326342
YBR094W	0.641371		YBR094W	0.555329										YBR094W	-0.172241	0.181316	0.03889	-0.015798
YBR095C	0.108795		YBR095C	0.499703										YBR095C	-0.085746	0.169402	-0.060506	7.9e-05
YBR096W	0.926143		YBR096W	0.243742										YBR096W	0.069577	-0.287019	-0.055053	-0.674105
YBR097W	0.278725		YBR097W	0.191788										YBR097W	-0.220464	-0.533699	-0.079871	-1.01486
YBR098W	0.243703		YBR098W	0.83868										YBR098W	-0.871893	-0.290737	-0.371296	0.171129
YBR101C	0.603694		YBR101C	0.300139										YBR101C	0.186763	0.553351	-1.13646	0.179661
YBR102C	0.916357		YBR102C	0.332258										YBR102C	0.320205	0.095503	-0.41772	0.025763
YBR103W	0.996452		YBR103W	0.433933										YBR103W	0.441076	0.743679	-0.436187	0.077456
YBR104W	0.760524		YBR104W	0.900026										YBR104W	-0.305608	-0.388204	0.132547	0.282071
YBR105C	0.292431		YBR105C	0.92208										YBR105C	0.380689	-0.603434	1.12591	0.772715
YBR106W	0.270851		YBR106W	0.756242										YBR106W	0.24153	-0.627343	0.090898	0.26709
YBR107C	0.201595		YBR107C	0.298763										YBR107C	-0.459242	-0.35109	-0.232548	-0.114831
YBR108W	0.802862		YBR108W	0.532317										YBR108W	0.329704	0.054902	-0.169864	-1.08061
YBR109C	0.911259		YBR109C	0.299441										YBR109C	0.117453	-0.914775	-0.15579	-0.298116
YBR110W	0.647288		YBR110W	0.48348										YBR110W	0.094966	-0.02328	-0.40312	-0.896949
YBR111C	0.299013		YBR111C	0.169784										YBR111C	-0.260438	-0.520347	-0.085068	-0.911548
YBR111W-A	0.474964		YBR111W-A	0.0677548										YBR111W-A	-0.37447	-0.616865	-0.014734	-0.497784
YBR112C	0.380481		YBR112C	0.599591										YBR112C	1.10351	0.557722	0.209642	-0.087967
YBR114W	0.992713		YBR114W	0.726631										YBR114W	-0.455111	-0.250325	0.465651	0.093079
YBR115C	0.612318		YBR115C	0.81334										YBR115C	0.751591	0.103009	-0.133995	-0.192106
YBR117C	0.987603		YBR117C	0.415613										YBR117C	-1.67841	-1.25586	1.61429	-0.167453
YBR118W	0.818196		YBR118W	0.335156										YBR118W	0.043981	-0.009815	-0.080541	-0.037054
YBR119W	0.963033		YBR119W	0.911839										YBR119W	0.088779	0.42516	-0.099738	-0.321144
YBR120C	0.299839		YBR120C	0.441602										YBR120C	-0.771778	-0.185327	-0.250982	-0.017048
YBR121C	0.786132		YBR121C	0.321824										YBR121C	0.236308	0.080781	-0.113991	0.281053
YBR122C	0.549272		YBR122C	0.177617										YBR122C	0.024758	-0.113727	-0.319244	-0.205047
YBR123C	0.585417		YBR123C	0.425046										YBR123C	0.641465	0.737607	-0.086587	0.087247
YBR125C	0.48273		YBR125C	0.391013										YBR125C	0.419844	-0.065267	0.011392	-0.377507
YBR126C	0.264653		YBR126C	0.277925										YBR126C	-0.216119	-0.498421	-0.55773	-1.37039
YBR127C	0.538245		YBR127C	0.228932										YBR127C	1.09821	-0.329985	-0.066054	-0.149661
YBR128C	0.127912		YBR128C	0.564942										YBR128C	-1.57448	0.178067	-1.04165	-1.73951
YBR129C	0.223517		YBR129C	0.724255										YBR129C	-0.296957	0.704097	-0.137739	-0.258819
YBR130C	0.79269		YBR130C	0.762695										YBR130C	-0.009589	-0.184335	0.019366	0.421073
YBR131W	0.878348		YBR131W	0.425118										YBR131W	-0.315216	1.45388	0.213027	0.171805
YBR132C	0.135349		YBR132C	0.203936										YBR132C	-1.40326	-0.681618	-0.904986	-1.35845
YBR133C	0.00389522		YBR133C	0.899514										YBR133C	0.072202	-0.240803	0.073091	0.174673
YBR135W	0.0286105		YBR135W	0.797553										YBR135W	0.532245	-0.714185	0.582371	0.360444
YBR136W	0.475239		YBR136W	0.097623										YBR136W	0.7447	-0.253745	0.028979	-0.185808
YBR137W	0.307073		YBR137W	0.112061										YBR137W	-0.306141	-0.479739	-0.095724	-0.687319
YBR138C	0.00982984		YBR138C	0.292677										YBR138C	-0.852794	-0.341315	-0.826857	-0.115257
YBR139W	0.805317		YBR139W	0.395772										YBR139W	0.542638	-0.223497	-0.282221	-1.35289
YBR140C	0.89769		YBR140C	0.642545										YBR140C	0.173772	0.176145	-0.241011	-0.773491
YBR141C	0.923671		YBR141C	0.490334										YBR141C	-0.54653	0.022334	0.696255	1.4708
YBR142W	0.241125		YBR142W	0.136593										YBR142W	0.18568	0.688307	0.43117	1.07188
YBR143C	0.70267		YBR143C	0.963322										YBR143C	0.425315	-0.449081	-0.140168	0.504055
YBR145W	0.889088		YBR145W	0.502573										YBR145W	0.65651	0.005537	-0.936969	-1.36987
YBR146W	0.0359041		YBR146W	0.394159										YBR146W	-0.160561	-0.344271	-0.1434	-0.05777
YBR147W	0.244336		YBR147W	0.391053										YBR147W	-0.581727	-0.290633	-1.36981	-1.68166
YBR148W	0.239298		YBR148W	0.252887										YBR148W	-0.716791	0.221173	-0.311122	0.09044
YBR149W	0.994213		YBR149W	0.61945										YBR149W	0.146404	0.266726	-0.143766	-1.40482
YBR150C	0.795426		YBR150C	0.997548										YBR150C	0.497642	0.675194	-0.249074	-0.670013
YBR151W	0.637592		YBR151W	0.124673										YBR151W	0.101016	-0.594789	-0.460086	-0.397868
YBR152W	0.557729		YBR152W	0.705635										YBR152W	-1.81959	-0.102353	0.165456	0.034261
YBR153W	0.360978		YBR153W	0.0419353										YBR153W	0.319799	0.222481	0.070968	0.253907
YBR154C	0.920664		YBR154C	0.781876										YBR154C	-0.338803	-0.538214	0.435843	1.13507
YBR155W	0.0835453		YBR155W	0.177809										YBR155W	0.444279	0.609344	0.579395	1.09941
YBR156C	0.361212		YBR156C	0.344513										YBR156C	-0.410976	0.21441	-0.091043	0.860348
YBR157C	0.0952279		YBR157C	0.0287169										YBR157C	-0.870251	-0.5617	-0.642296	-0.513181
YBR158W	0.200237		YBR158W	0.449036										YBR158W	0.685783	0.126056	0.349103	0.010113
YBR159W	0.556501		YBR159W	0.292469										YBR159W	0.641317	-0.256391	-0.057068	-0.086673
YBR160W	0.0964475		YBR160W	0.652126										YBR160W	-0.240403	-0.129591	-0.327033	0.531954
YBR161W	0.43893		YBR161W	0.137471										YBR161W	-1.44484	-0.100435	-0.139028	-0.156879
YBR162C	0.837003		YBR162C	0.213449										YBR162C	0.557902	0.458332	-0.326407	0.221464
YBR162W-A	0.770352		YBR162W-A	0.670147										YBR162W-A	-0.352492	-0.868073	0.159391	0.237693
YBR163W	0.342645		YBR163W	0.44558										YBR163W	-0.689587	-0.740499	-0.174005	-0.063454
YBR164C	0.761458		YBR164C	0.507227										YBR164C	0.088813	-0.002465	-0.203952	0.217128
YBR165W	0.0302059		YBR165W	0.599102										YBR165W	-0.52297	-0.224152	-0.57511	0.035178
YBR166C	0.522602		YBR166C	0.642963										YBR166C	-0.897524	-0.513947	0.031879	0.117395
YBR167C	0.258295		YBR167C	0.574577										YBR167C	-0.764322	0.398064	-0.304987	-0.046846
YBR168W	0.708397		YBR168W	0.495117										YBR168W	0.084773	-0.000858	-0.249651	-0.111865
YBR169C	0.740522		YBR169C	0.190602										YBR169C	0.515772	0.30496	-1.29958	0.161099
YBR170C	0.847365		YBR170C	0.827011										YBR170C	0.156986	0.346202	-0.258574	-0.613634
YBR171W	0.0781837		YBR171W	0.738551										YBR171W	0.236729	-0.11864	0.18471	0.301655
YBR172C	0.398133		YBR172C	0.438805										YBR172C	0.12294	0.082785	0.761745	0.858566
YBR173C	0.79088		YBR173C	0.329277										YBR173C	-0.352383	-0.16127	0.173235	-0.586886
YBR175W	0.449871		YBR175W	0.51532										YBR175W	0.012595	0.200669	0.15962	-0.00483
YBR176W	0.67548		YBR176W	0.196816										YBR176W	-0.174588	-0.372261	0.049381	-0.721658
YBR177C	0.625145		YBR177C	0.999765										YBR177C	0.976473	0.552007	-0.194463	-0.551599
YBR179C	0.677998		YBR179C	0.810441										YBR179C	0.2556	0.233724	-0.073388	-0.123958
YBR180W	0.565316		YBR180W	0.568952										YBR180W	-3.00673	-0.593436	0.309572	0.064527
YBR181C	0.803088		YBR181C	0.618783										YBR181C	0.146159	-0.035982	-0.075367	0.190603
YBR182C-A	0.367659		YBR182C-A	0.498099										YBR182C-A	-2.3349	-0.00141	-0.492496	-0.472099
YBR182C	0.582864		YBR182C	0.211906										YBR182C	-1.09806	-0.380116	0.143739	-0.781829
YBR183W	0.433266		YBR183W	0.749285										YBR183W	-0.099793	0.613956	-0.948502	-0.253501
YBR184W	0.734772		YBR184W	0.215126										YBR184W	-1.471	0.430372	0.568479	0.896701
YBR185C	0.866542		YBR185C	0.504978										YBR185C	0.012732	-0.379549	-0.019614	0.002968
YBR186W	0.429927		YBR186W	0.835723										YBR186W	-2.78192	0.458483	-0.307449	-0.267005
YBR187W	0.16622		YBR187W	0.348317										YBR187W	0.393055	0.23494	0.227298	0.967321
YBR188C	0.88427		YBR188C	0.463364										YBR188C	-0.451102	0.24653	0.311012	0.014203
YBR189W	0.648944		YBR189W	0.223151										YBR189W	0.176452	0.234138	-0.042053	0.50403
YBR191W	0.463424		YBR191W	0.922556										YBR191W	0.236748	-0.14976	0.013617	0.191477
YBR192W	0.492998		YBR192W	0.580184										YBR192W	0.006572	-0.098729	0.597507	0.779709
YBR193C	0.607788		YBR193C	0.266342										YBR193C	-0.33762	-0.357481	0.057716	-0.137433
YBR194W	0.262982		YBR194W	0.626757										YBR194W	-0.778303	-0.652237	-0.303943	0.13161
YBR195C	0.299454		YBR195C	0.878718										YBR195C	0.041081	-0.024669	0.126066	0.036457
YBR196C-A	0.455715		YBR196C-A	0.904886										YBR196C-A	-0.819853	0.653058	-0.057123	-0.8845
YBR196C-B	0.376163		YBR196C-B	0.171212										YBR196C-B	-1.09853	-0.199556	-0.216425	-0.351412
YBR196C	0.154049		YBR196C	0.716485										YBR196C	0.182027	0.197852	0.10996	-0.559225
YBR197C	0.507927		YBR197C	0.239587										YBR197C	-0.433109	-0.299193	0.005393	-0.129703
YBR198C	0.487835		YBR198C	0.503984										YBR198C	0.763248	-0.001782	0.014586	0.284729
YBR199W	0.804472		YBR199W	0.146313										YBR199W	0.235319	-0.433624	-0.453928	-0.698496
YBR200W-A	0.528773		YBR200W-A	0.102734										YBR200W-A	-2.42497	-0.514454	0.109676	-0.714518
YBR200W	0.803952		YBR200W	0.696248										YBR200W	0.14582	0.156874	-0.075443	-0.492669
YBR201W	0.707815		YBR201W	0.389301										YBR201W	-0.124627	-0.205239	0.368124	-1.16839
YBR202W	0.131013		YBR202W	0.343933										YBR202W	0.399503	-0.270992	0.261515	-1.08319
YBR203W	0.725008		YBR203W	0.360828										YBR203W	0.863982	-0.555431	-0.318752	-0.123395
YBR204C	0.142536		YBR204C	0.495637										YBR204C	-0.857369	-0.008216	-0.539324	-1.19881
YBR205W	0.221638		YBR205W	0.805526										YBR205W	0.13136	-0.176241	0.061401	0.091735
YBR207W	0.72405		YBR207W	0.6334										YBR207W	0.294321	0.335443	-0.801472	-1.57732
YBR208C	0.341784		YBR208C	0.51857										YBR208C	-0.745031	-0.786334	-0.189067	0.022944
YBR210W	0.0449466		YBR210W	0.860753										YBR210W	-0.380228	0.470558	-0.330001	-0.299406
YBR211C	0.603505		YBR211C	0.205518										YBR211C	0.061307	0.125335	-0.373747	0.062499
YBR212W	0.514647		YBR212W	0.968997										YBR212W	0.467927	0.269817	-0.010768	-0.297465
YBR213W	0.3326		YBR213W	0.374041										YBR213W	0.568277	0.07732	0.152971	0.385677
YBR214W	0.358853		YBR214W	0.176632										YBR214W	-0.186695	-0.59148	-0.828216	-1.06254
YBR215W	0.371858		YBR215W	0.0126409										YBR215W	-0.029055	0.346325	-0.142393	0.360359
YBR216C	0.686276		YBR216C	0.454374										YBR216C	0.155808	0.251044	-0.046937	0.018023
YBR217W	0.526035		YBR217W	0.819447										YBR217W	-1.33774	-0.352068	0.054739	0.193153
YBR218C	0.424413		YBR218C	0.55324										YBR218C	0.200196	0.066716	0.023882	-0.795897
YBR219C	0.751085		YBR219C	0.334164										YBR219C	-0.825376	0.928434	0.343531	0.247475
YBR220C	0.331672		YBR220C	0.809256										YBR220C	0.792909	-0.221359	0.214679	0.419259
YBR221C	0.451077		YBR221C	0.871607										YBR221C	0.916812	0.43784	0.070594	-0.289192
YBR221W-A	0.383438		YBR221W-A	0.984471										YBR221W-A	-1.52438	0.414701	-0.282268	-0.435442
YBR222C	0.175719		YBR222C	0.261001										YBR222C	0.834268	-0.472153	0.465976	-0.18608
YBR223C	0.736046		YBR223C	0.659362										YBR223C	0.108398	0.173218	-0.278829	-0.677458
YBR225W	0.336795		YBR225W	0.184345										YBR225W	-0.071896	-0.264176	-0.274276	-0.488401
YBR227C	0.99142		YBR227C	0.488828										YBR227C	-0.104562	-0.005935	0.101781	-0.338154
YBR228W	0.20878		YBR228W	0.806623										YBR228W	-0.60654	0.165617	-0.298583	-0.316849
YBR229C	0.231986		YBR229C	0.459925										YBR229C	-0.020908	-0.058254	-0.046694	-0.924172
YBR230C	0.922351		YBR230C	0.0806698										YBR230C	-0.229167	-0.580818	0.293198	-0.750415
YBR230W-A	0.633396		YBR230W-A	0.232201										YBR230W-A	0.079015	-0.399771	-0.371556	-0.893618
YBR231C	0.503227		YBR231C	0.177613										YBR231C	1.09968	0.188148	-0.005575	0.104356
YBR233W-A	0.208409		YBR233W-A	0.060863										YBR233W-A	-0.402532	1.09464	-0.198447	0.90307
YBR233W	0.706699		YBR233W	0.748688										YBR233W	-0.188949	0.329613	0.063599	-0.135735
YBR234C	0.613819		YBR234C	0.908973										YBR234C	0.24083	0.634089	-0.043522	-0.84737
YBR235W	0.642771		YBR235W	0.074809										YBR235W	0.34102	-0.377414	-0.077787	-0.478452
YBR236C	0.0454065		YBR236C	0.624627										YBR236C	-0.077928	-0.510758	-0.08992	0.101285
YBR237W	0.434468		YBR237W	0.642197										YBR237W	0.130075	0.338811	0.013437	-0.076962
YBR238C	0.989504		YBR238C	0.631531										YBR238C	-0.977021	-0.187836	1.00978	0.896166
YBR239C	0.551624		YBR239C	0.465763										YBR239C	-0.026317	0.18857	0.323825	0.010151
YBR240C	0.605486		YBR240C	0.0521225										YBR240C	-1.40927	-0.442637	0.235673	-0.521774
YBR241C	0.429696		YBR241C	0.954778										YBR241C	0.829265	0.706801	0.091953	-0.815089
YBR242W	0.445783		YBR242W	0.20217										YBR242W	0.010662	0.344746	0.124891	0.682342
YBR243C	0.0684805		YBR243C	0.211505										YBR243C	0.522638	0.467403	0.420764	0.959824
YBR244W	0.330258		YBR244W	0.239604										YBR244W	-0.246542	0.429723	-0.067339	0.99134
YBR245C	0.621891		YBR245C	0.765049										YBR245C	0.365079	-0.164168	-0.070767	0.371264
YBR246W	0.279579		YBR246W	0.594274										YBR246W	0.099666	-0.076524	0.27626	0.512974
YBR247C	0.109013		YBR247C	0.355046										YBR247C	0.494742	0.348766	0.701632	1.50517
YBR248C	0.647945		YBR248C	0.690618										YBR248C	0.924185	0.116061	-0.218725	-0.375963
YBR249C	0.498672		YBR249C	0.995362										YBR249C	1.33206	0.141502	0.002778	-0.139455
YBR250W	0.41395		YBR250W	0.251453										YBR250W	-1.79814	-1.07519	-0.244541	-0.442485
YBR251W	0.931261		YBR251W	0.769596										YBR251W	0.281265	-1.19955	-0.226252	0.5407
YBR252W	0.111646		YBR252W	0.924675										YBR252W	0.30179	-0.819656	0.431773	1.04082
YBR253W	0.520391		YBR253W	0.628126										YBR253W	-0.863802	1.79066	0.027677	-0.365334
YBR254C	0.580949		YBR254C	0.637905										YBR254C	-0.393262	-0.747881	0.050276	0.164589
YBR255C-A	0.225005		YBR255C-A	0.37094										YBR255C-A	-0.241616	-0.177421	-0.111384	-0.036469
YBR255W	0.317064		YBR255W	0.549347										YBR255W	-0.071198	0.047185	-0.240913	-0.607506
YBR256C	0.786345		YBR256C	0.460207										YBR256C	0.399338	-0.069519	-0.192799	-1.11072
YBR257W	0.772703		YBR257W	0.0855896										YBR257W	-0.478101	0.279871	0.218319	0.367424
YBR258C	0.106874		YBR258C	0.00965466										YBR258C	-0.859307	-0.294309	-0.610257	-0.285515
YBR259W	0.365976		YBR259W	0.680982										YBR259W	-0.44811	-0.410441	-0.095757	0.119931
YBR260C	0.690313		YBR260C	0.340831										YBR260C	0.011104	-0.092538	-0.036031	-0.362374
YBR261C	0.064815		YBR261C	0.320485										YBR261C	0.616299	0.123906	0.756556	0.427703
YBR262C	0.536416		YBR262C	0.513211										YBR262C	-0.354648	-0.449824	0.020309	0.009336
YBR263W	0.445741		YBR263W	0.848438										YBR263W	0.842287	0.063451	0.071962	-0.038669
YBR264C	0.0994088		YBR264C	0.939727										YBR264C	0.055462	-0.205778	0.076188	0.170086
YBR265W	0.52115		YBR265W	0.100199										YBR265W	1.00351	0.279785	-0.033351	0.203142
YBR267W	0.197625		YBR267W	0.280855										YBR267W	0.601029	0.502686	1.16878	1.40217
YBR268W	0.515463		YBR268W	0.540984										YBR268W	-0.112948	-0.560327	0.002744	0.036122
YBR269C	0.225578		YBR269C	0.0897973										YBR269C	-0.136813	-0.975283	-0.297481	-0.732749
YBR270C	0.409722		YBR270C	0.761611										YBR270C	-0.795869	0.208525	-0.113623	-0.478546
YBR271W	0.470032		YBR271W	0.565784										YBR271W	0.02688	-0.139935	0.570596	1.3494
YBR272C	0.879631		YBR272C	0.368762										YBR272C	0.279591	-1.05623	-0.189773	-0.220878
YBR273C	0.159724		YBR273C	0.743888										YBR273C	-0.374372	0.257638	-0.221622	-0.639284
YBR274W	0.551501		YBR274W	0.585083										YBR274W	-1.09509	1.09696	0.088784	-0.147487
YBR275C	0.355265		YBR275C	0.0286799										YBR275C	-0.129333	0.555434	-0.559037	0.607877
YBR276C	0.139714		YBR276C	0.291119										YBR276C	0.065383	0.842493	0.102925	0.286796
YBR278W	0.397805		YBR278W	0.527901										YBR278W	-0.644238	-0.328832	-0.104315	0.014421
YBR279W	0.978766		YBR279W	0.135366										YBR279W	0.116954	0.071919	-0.125028	0.046379
YBR280C	0.747863		YBR280C	0.323041										YBR280C	0.423182	-0.352388	-0.173626	-1.23492
YBR281C	0.571154		YBR281C	0.127626										YBR281C	0.824547	0.511539	-0.092544	0.772451
YBR282W	0.565557		YBR282W	0.335388										YBR282W	-0.653145	-0.8771	0.067497	-0.231987
YBR283C	0.624831		YBR283C	0.250721										YBR283C	0.26562	0.360869	-0.052762	0.148998
YBR284W	0.730329		YBR284W	0.252531										YBR284W	-1.58356	-0.583109	0.599313	-1.42373
YBR285W	0.418558		YBR285W	0.356187										YBR285W	-1.04025	-0.768331	-0.133809	-3.34314
YBR286W	0.997841		YBR286W	0.574543										YBR286W	0.063918	0.1127	-0.063486	-0.958095
YBR287W	0.804625		YBR287W	0.176843										YBR287W	0.254656	-0.552987	-0.49094	-0.994171
YBR288C	0.366562		YBR288C	0.771566										YBR288C	-0.331508	-0.172353	-0.070521	0.37923
YBR289W	0.420288		YBR289W	0.736066										YBR289W	0.025471	-0.158954	0.202359	0.408836
YBR290W	0.588232		YBR290W	0.842205										YBR290W	0.03402	0.283488	-0.24389	-0.475585
YBR291C	0.26623		YBR291C	0.0642724										YBR291C	1.00752	0.662619	0.387544	0.812003
YBR293W	0.460116		YBR293W	0.075151										YBR293W	-0.862802	-0.20018	-0.054125	-0.254051
YBR294W	0.991954		YBR294W	0.608776										YBR294W	0.384087	0.29086	-0.374499	-0.050187
YBR295W	0.773153		YBR295W	0.393608										YBR295W	0.428556	-0.315989	-0.936749	-1.87315
YBR296C-A	0.408195		YBR296C-A	0.979609										YBR296C-A	-3.01882	0.92904	-0.438376	-0.990547
YBR296C	0.227407		YBR296C	0.492036										YBR296C	-0.861529	-0.021526	-1.88754	-1.72069
YBR297W	0.946885		YBR297W	0.834977										YBR297W	1.3697	0.364691	-1.15829	-0.211812
YBR298C-A	0.512716		YBR298C-A	0.955231										YBR298C-A	-2.96748	-0.360272	0.05928	0.312857
YBR298C	0.349553		YBR298C	0.158215										YBR298C	-0.343343	-0.143435	-1.42572	-0.085371
YBR299W	0.582595		YBR299W	0.631213										YBR299W	-0.807804	-0.1796	0.105397	0.859012
YBR301W	0.578235		YBR301W	0.283045										YBR301W	-3.09783	-0.243423	0.382623	-0.686416
YBR302C	0.368328		YBR302C	0.561209										YBR302C	-0.968596	0.045117	-0.203241	-0.467807
YCL001W-A	0.463682		YCL001W-A	0.448471										YCL001W-A	-2.06669	0.564927	-0.118029	0.045826
YCL001W-B	0.41952		YCL001W-B	0.387099										YCL001W-B	-2.30563	-0.045939	-0.293035	-0.256318
YCL001W	0.247091		YCL001W	0.474068										YCL001W	-0.259735	0.368157	-0.108979	0.015005
YCL002C	0.601891		YCL002C	0.846265										YCL002C	-0.778478	-0.25859	0.12567	0.427592
YCL004W	0.459463		YCL004W	0.307351										YCL004W	-1.07075	-0.17251	-0.068272	-0.552561
YCL005W-A	0.209672		YCL005W-A	0.532673										YCL005W-A	-0.076076	-0.832946	-0.155088	0.042787
YCL005W	0.0283608		YCL005W	0.0100373										YCL005W	0.180353	0.310571	0.197183	0.300929
YCL008C	0.714938		YCL008C	0.519873										YCL008C	-0.118301	0.013129	0.336977	-0.420442
YCL009C	0.352946		YCL009C	0.933026										YCL009C	0.774707	0.776201	0.182203	-0.627934
YCL010C	0.758278		YCL010C	0.790846										YCL010C	-0.514777	0.338999	0.221113	-0.689662
YCL011C	0.541881		YCL011C	0.798132										YCL011C	0.472277	0.324976	-0.031114	-0.164384
YCL012C	0.134009		YCL012C	0.297969										YCL012C	-0.471917	-0.95836	-0.305755	-0.314774
YCL014W	0.509388		YCL014W	0.211411										YCL014W	1.12739	0.56294	-0.016626	0.274236
YCL016C	0.798723		YCL016C	0.715164										YCL016C	-0.385762	-0.563939	0.195582	0.198204
YCL017C	0.630189		YCL017C	0.399997										YCL017C	1.35089	-0.115252	-0.280174	-0.727648
YCL018W	0.206781		YCL018W	0.855814										YCL018W	0.438212	0.183627	0.217432	-0.293599
YCL021W-A	0.631308		YCL021W-A	0.091451										YCL021W-A	-1.16431	-0.577526	0.243612	-0.431564
YCL024W	0.814169		YCL024W	0.10265										YCL024W	0.496444	0.353271	-0.267031	0.254426
YCL025C	0.32852		YCL025C	0.147514										YCL025C	0.405176	0.161143	0.111857	0.260671
YCL026C-A	0.401548		YCL026C-A	0.0695649										YCL026C-A	-2.03178	-0.391683	-0.316739	-0.314237
YCL026C-B	0.952815		YCL026C-B	0.595152										YCL026C-B	0.619509	0.194298	-0.533866	-1.29027
YCL027W	0.557417		YCL027W	0.101372										YCL027W	-1.69533	-0.342345	0.15332	-0.247603
YCL028W	0.61411		YCL028W	0.828691										YCL028W	0.265282	0.341099	-0.048066	-0.193631
YCL029C	0.957747		YCL029C	0.39162										YCL029C	-0.108734	0.046689	0.09518	0.271595
YCL030C	0.833088		YCL030C	0.374624										YCL030C	0.587679	-0.135594	-0.338995	-0.679578
YCL031C	0.0640419		YCL031C	0.406364										YCL031C	0.426246	0.125493	0.521955	0.84705
YCL032W	0.469625		YCL032W	0.612764										YCL032W	-0.291945	-0.303303	-0.01394	0.054293
YCL033C	0.453045		YCL033C	0.188797										YCL033C	0.024137	-0.469942	0.326661	-0.883526
YCL034W	0.754115		YCL034W	0.638924										YCL034W	1.03503	0.160728	-0.436582	-0.72481
YCL035C	0.699225		YCL035C	0.164668										YCL035C	-0.461884	-0.683227	0.149454	-0.397327
YCL036W	0.2824		YCL036W	0.521177										YCL036W	0.370919	-0.077253	1.04258	2.32157
YCL037C	0.748754		YCL037C	0.576559										YCL037C	-1.69266	0.241598	0.697244	-0.029195
YCL038C	0.340513		YCL038C	0.503688										YCL038C	-0.500024	0.006631	-0.127955	-1.14471
YCL039W	0.472295		YCL039W	0.34529										YCL039W	-0.019585	-0.334751	-0.449757	-1.35025
YCL040W	0.946343		YCL040W	0.721931										YCL040W	0.700194	0.581359	-0.5911	-1.59955
YCL042W	0.835127		YCL042W	0.2569										YCL042W	-0.676923	0.0771	0.393369	0.191996
YCL043C	0.145585		YCL043C	0.892609										YCL043C	0.598267	0.728293	0.37235	-1.02728
YCL044C	0.573642		YCL044C	0.35422										YCL044C	-0.10229	-0.157474	0.880327	-0.675626
YCL045C	0.595659		YCL045C	0.0160017										YCL045C	0.240348	0.01204	-0.036389	0.012661
YCL047C	0.468978		YCL047C	0.265766										YCL047C	0.007632	-0.242255	0.156496	-0.628437
YCL048W	0.225657		YCL048W	0.5										YCL048W	-1.24049	0	-0.570321	-0.620689
YCL049C	0.65326		YCL049C	0.359187										YCL049C	-0.103991	-0.292628	0.02553	-1.30133
YCL050C	0.226571		YCL050C	0.808216										YCL050C	-0.126146	-0.413459	-0.057777	0.217434
YCL051W	0.464728		YCL051W	0.595565										YCL051W	-0.006119	0.016641	-0.110328	-0.110023
YCL052C	0.524945		YCL052C	0.16342										YCL052C	0.017057	-0.324533	-0.435094	-0.555546
YCL054W	0.0559295		YCL054W	0.282903										YCL054W	0.494999	0.524517	0.590621	1.47801
YCL055W	0.411762		YCL055W	0.91805										YCL055W	-0.474051	-0.314683	-0.066129	0.242553
YCL056C	0.192236		YCL056C	0.532164										YCL056C	-1.18728	-0.176934	-0.623306	0.008947
YCL057C-A	0.957586		YCL057C-A	0.80367										YCL057C-A	-0.254182	-0.456185	0.290526	0.23576
YCL057W	0.461811		YCL057W	0.406048										YCL057W	0.521608	-0.197588	0.031327	-1.32912
YCL058C	0.458301		YCL058C	0.777385										YCL058C	-2.01626	-0.392698	-0.132255	0.843502
YCL059C	0.230595		YCL059C	0.29257										YCL059C	0.504924	0.354672	0.227414	1.04972
YCL061C	0.291863		YCL061C	0.430121										YCL061C	-0.128468	0.073736	-0.378838	0.669055
YCL063W	0.133863		YCL063W	0.56902										YCL063W	-0.358469	-0.064461	-0.232369	0.592238
YCL064C	0.0695846		YCL064C	0.802069										YCL064C	-0.269202	-1.05052	-0.21596	0.539573
YCL066W	0.406291		YCL066W	0.645284										YCL066W	-2.78558	-0.952557	-0.413017	0.221238
YCL068C	0.594401		YCL068C	0.475736										YCL068C	-2.28077	-0.494182	0.340703	-0.018844
YCL069W	0.273124		YCL069W	0.0254106										YCL069W	-3.9288	-0.721933	-1.46258	-0.781994
YCL073C	0.476198		YCL073C	0.0533924										YCL073C	-2.70099	-0.61715	-0.101032	-0.521434
YCR002C	0.147475		YCR002C	0.706505										YCR002C	-0.392719	0.400586	-0.242806	-0.134699
YCR003W	0.207207		YCR003W	0.0160522										YCR003W	-0.403129	-0.138293	-0.199689	-0.145449
YCR004C	0.870519		YCR004C	0.234044										YCR004C	0.331727	-0.400425	-0.218291	-0.902078
YCR005C	0.106191		YCR005C	0.206399										YCR005C	-0.220282	-0.091334	-0.309477	-0.183797
YCR007C	0.279236		YCR007C	0.394688										YCR007C	-1.05878	-0.178566	-0.382621	-1.06958
YCR008W	0.364743		YCR008W	0.528926										YCR008W	0.728277	-0.039026	0.157101	0.858308
YCR009C	0.619567		YCR009C	0.00586168										YCR009C	0.061507	-0.475024	-0.323626	-0.466356
YCR010C	0.35717		YCR010C	0.853531										YCR010C	-1.33165	-1.33962	-0.30388	2.1591
YCR011C	0.618737		YCR011C	0.239402										YCR011C	0.23746	-0.342759	-0.04481	-0.790032
YCR012W	0.461162		YCR012W	0.726185										YCR012W	0.94696	0.26263	0.057842	-0.707829
YCR014C	0.956475		YCR014C	0.40984										YCR014C	0.248779	-0.151125	-0.285354	-0.021547
YCR015C	0.508425		YCR015C	0.441846										YCR015C	-1.08009	0.066769	0.014294	0.728897
YCR016W	0.22145		YCR016W	0.293662										YCR016W	0.138653	0.368431	0.296403	1.09664
YCR017C	0.60383		YCR017C	0.320492										YCR017C	0.239236	-0.142252	-0.039368	-0.49105
YCR018C	0.413122		YCR018C	0.272173										YCR018C	-1.74889	-0.273595	-0.240159	-0.731589
YCR019W	0.461327		YCR019W	0.391206										YCR019W	-0.684702	-0.401446	-0.041645	-0.06928
YCR020C-A	0.86397		YCR020C-A	0.895065										YCR020C-A	0.329811	-0.584162	-0.212201	0.417538
YCR020C	0.556409		YCR020C	0.0915346										YCR020C	-0.969279	0.244383	0.08611	0.327127
YCR020W-B	0.16053		YCR020W-B	0.848993										YCR020W-B	-0.572156	-0.58248	-0.337729	0.355678
YCR021C	0.0352501		YCR021C	0.41126										YCR021C	-2.81861	0.153958	-3.1494	1.09733
YCR023C	0.420107		YCR023C	0.0839246										YCR023C	-0.062626	-0.122626	-0.496406	-0.160117
YCR024C-A	0.548066		YCR024C-A	0.0525416										YCR024C-A	0.016682	-0.247578	-0.220529	-0.292231
YCR024C-B	0.212572		YCR024C-B	0.46676										YCR024C-B	-0.296153	-0.01963	-0.143603	-0.37562
YCR024C	0.719478		YCR024C	0.198391										YCR024C	-0.936628	-0.401878	0.33634	-0.783825
YCR026C	0.209007		YCR026C	0.945645										YCR026C	-0.012672	-0.44009	-0.025765	0.522474
YCR027C	0.0226868		YCR027C	0.94792										YCR027C	0.115744	-0.602769	0.124302	0.710438
YCR028C-A	0.171975		YCR028C-A	0.568695										YCR028C-A	-0.186992	-0.761492	-0.105891	0.08249
YCR028C	0.491049		YCR028C	0.23827										YCR028C	0.428482	0.634171	0.006025	0.276479
YCR030C	0.479879		YCR030C	0.75443										YCR030C	1.38551	0.541395	0.043805	-1.28174
YCR031C	0.331646		YCR031C	0.714535										YCR031C	0.188056	-0.388894	0.050924	0.136251
YCR032W	0.0854837		YCR032W	0.994214										YCR032W	0.174025	0.28583	0.228387	-0.291073
YCR033W	0.835827		YCR033W	0.455808										YCR033W	0.373122	-0.092639	-0.64046	-0.006441
YCR034W	0.183931		YCR034W	0.36218										YCR034W	0.845147	0.353417	0.457851	1.60692
YCR035C	0.970217		YCR035C	0.972981										YCR035C	-0.385357	-0.6812	0.350888	0.741622
YCR036W	0.792986		YCR036W	0.603596										YCR036W	0.720227	0.024499	-0.357034	-0.14922
YCR037C	0.203655		YCR037C	0.0111618										YCR037C	0.39646	0.306623	0.199148	0.317568
YCR038C	0.575782		YCR038C	0.179046										YCR038C	-0.68629	-0.083266	0.082083	-0.150924
YCR042C	0.917363		YCR042C	0.98631										YCR042C	0.114479	0.511296	-0.088042	-0.533773
YCR043C	0.31201		YCR043C	0.0149326										YCR043C	0.126114	0.689874	0.414592	0.723021
YCR044C	0.704887		YCR044C	0.892285										YCR044C	-0.057379	0.311824	0.172088	-0.440313
YCR045C	0.425681		YCR045C	0.25081										YCR045C	-2.32725	0.272	-0.272925	0.112261
YCR046C	0.211498		YCR046C	0.119881										YCR046C	0.273016	-0.28994	0.560631	-0.197122
YCR047C	0.112102		YCR047C	0.439631										YCR047C	0.977609	0.103184	0.682263	1.08486
YCR048W	0.279412		YCR048W	0.900847										YCR048W	0.818791	0.625023	0.295638	-0.455378
YCR051W	0.0728627		YCR051W	0.153584										YCR051W	0.983961	0.335736	0.781063	0.554859
YCR052W	0.242744		YCR052W	0.234376										YCR052W	0.841065	0.925618	0.359665	0.410296
YCR053W	0.429535		YCR053W	0.422751										YCR053W	0.61753	0.195872	0.068633	0.023885
YCR054C	0.531		YCR054C	0.0655461										YCR054C	0.280834	0.49832	-0.013686	0.613164
YCR057C	0.00350656		YCR057C	0.549601										YCR057C	0.9171	-0.107109	0.927259	1.37193
YCR059C	0.0591214		YCR059C	0.798225										YCR059C	0.180213	-0.309421	0.217229	0.611482
YCR060W	0.363183		YCR060W	0.550456										YCR060W	0.404967	-0.039234	0.088397	0.493993
YCR061W	0.239603		YCR061W	0.865185										YCR061W	1.57124	0.731199	0.681103	-1.13171
YCR063W	0.962994		YCR063W	0.531924										YCR063W	-0.456125	-0.031713	0.512493	0.631888
YCR065W	0.874958		YCR065W	0.727927										YCR065W	0.383908	-0.414077	-0.574641	0.154928
YCR066W	0.529633		YCR066W	0.762244										YCR066W	-0.369619	-0.100349	0.017217	0.229668
YCR067C	0.312058		YCR067C	0.748587										YCR067C	0.394867	0.229824	0.120081	-0.558345
YCR068W	0.218808		YCR068W	0.479897										YCR068W	-0.031772	-0.008202	-0.067192	-0.25965
YCR069W	0.923727		YCR069W	0.448523										YCR069W	0.173554	-0.079829	-0.136257	-0.985089
YCR071C	0.398535		YCR071C	0.0731858										YCR071C	0.212057	-0.285395	0.034087	-0.226309
YCR072C	0.335371		YCR072C	0.168309										YCR072C	0.261024	0.86265	0.986779	1.5031
YCR073C	0.556598		YCR073C	0.903875										YCR073C	0.684631	0.267672	-0.061027	-0.363742
YCR073W-A	0.194775		YCR073W-A	0.907395										YCR073W-A	0.594047	0.236102	0.308849	-0.317153
YCR075C	0.924158		YCR075C	0.168003										YCR075C	0.735144	-0.441421	-0.935066	-0.253621
YCR075W-A	0.177545		YCR075W-A	0.377823										YCR075W-A	-0.326905	-0.916675	-0.181363	-0.178116
YCR076C	0.308838		YCR076C	0.664197										YCR076C	0.528149	0.498559	0.163536	-0.131518
YCR077C	0.552725		YCR077C	0.694528										YCR077C	0.964295	0.211598	-0.080046	-0.066747
YCR079W	0.549045		YCR079W	0.974677										YCR079W	0.635689	0.574449	-0.04907	-0.530475
YCR081W	0.809214		YCR081W	0.401216										YCR081W	-0.110014	-0.547886	0.208402	-0.085704
YCR082W	0.391263		YCR082W	0.149774										YCR082W	0.222339	-0.142111	0.03835	-0.231719
YCR083W	0.419566		YCR083W	0.245278										YCR083W	-0.548697	-1.07967	-0.069697	-0.456626
YCR084C	0.316871		YCR084C	0.0877133										YCR084C	1.18018	0.518648	0.349173	0.392333
YCR086W	0.499614		YCR086W	0.701508										YCR086W	-0.095602	-0.242747	-5.8e-05	0.741121
YCR087C-A	0.0500938		YCR087C-A	0.407763										YCR087C-A	0.486165	0.279158	0.569396	1.91325
YCR088W	0.323197		YCR088W	0.545875										YCR088W	0.511618	0.077048	0.145857	-1.06735
YCR089W	0.890233		YCR089W	0.49446										YCR089W	-0.380696	-0.176284	0.541255	-0.001534
YCR090C	0.628779		YCR090C	0.780947										YCR090C	-0.41429	-0.276833	0.084967	0.130771
YCR091W	0.153043		YCR091W	0.110877										YCR091W	-0.370221	-0.359194	-0.610678	-0.512581
YCR092C	0.435659		YCR092C	0.900582										YCR092C	-0.89474	-0.587804	-0.090737	0.427886
YCR093W	0.244017		YCR093W	0.345491										YCR093W	0.043336	-0.221982	0.101903	-0.054959
YCR094W	0.440215		YCR094W	0.263919										YCR094W	0.660334	0.110978	0.062195	0.28542
YCR095C	0.305092		YCR095C	0.964721										YCR095C	-0.606249	0.214755	-0.191635	-0.192181
YCR096C	0.326083		YCR096C	0.701268										YCR096C	-1.79889	0.081968	-0.504036	-0.250572
YCR097W	0.176198		YCR097W	0.194663										YCR097W	-0.913231	-0.339417	-0.509178	-0.176541
YCR098C	0.642424		YCR098C	0.533841										YCR098C	-2.52997	-0.606726	0.57564	0.032282
YCR099C	0.408733		YCR099C	0.433605										YCR099C	-0.664991	-0.180261	-0.095993	-1.72213
YCR100C	0.457936		YCR100C	0.0987058										YCR100C	-2.463	-0.880846	-0.162977	-1.20721
YCR101C	0.454996		YCR101C	0.135244										YCR101C	-2.22792	-0.544861	-0.157758	-0.844551
YCR102C	0.435492		YCR102C	0.0560063										YCR102C	-1.40011	-0.597855	-0.14236	-0.500939
YCR104W	0.516175		YCR104W	0.207743										YCR104W	-3.13495	-0.399295	0.079671	-0.807802
YCR105W	0.651449		YCR105W	0.974579										YCR105W	-1.82801	-0.266113	0.443269	0.288262
YCR106W	0.434699		YCR106W	0.1098										YCR106W	-1.87541	-0.228479	-0.193046	-0.324876
YCR107W	0.189164		YCR107W	0.0106801										YCR107W	-0.690021	-0.556361	-0.366508	-0.538
YCR108C	0.643816		YCR108C	0.350632										YCR108C	-4.56566	-1.06099	1.04932	-0.253609
YDL001W	0.0543734		YDL001W	0.279095										YDL001W	-0.258681	0.397944	-0.307124	0.143908
YDL002C	0.0826741		YDL002C	0.435289										YDL002C	-0.078889	0.741172	-0.10259	0.075599
YDL003W	0.0516887		YDL003W	0.419325										YDL003W	-0.293901	0.173222	-0.345968	1.3596
YDL004W	0.0825757		YDL004W	0.788449										YDL004W	0.210893	-0.452727	0.162223	0.220423
YDL005C	0.837887		YDL005C	0.934648										YDL005C	0.244567	0.163049	-0.143543	-0.132593
YDL006W	0.157949		YDL006W	0.00388229										YDL006W	-0.520447	0.418203	-0.310059	0.423335
YDL007W	0.544094		YDL007W	0.441838										YDL007W	0.439158	-0.054107	-0.030466	-0.590586
YDL008W	0.442474		YDL008W	0.547348										YDL008W	-0.822222	-0.789342	-0.0745	0.058815
YDL010W	0.1525		YDL010W	0.500363										YDL010W	-0.48145	0.982643	-0.792624	-0.000561
YDL012C	0.329709		YDL012C	0.524473										YDL012C	0.547145	-0.032032	0.149951	0.001232
YDL013W	0.789153		YDL013W	0.0394594										YDL013W	0.370332	0.172574	-0.180813	0.195412
YDL014W	0.192414		YDL014W	0.349668										YDL014W	1.32637	0.220659	0.695852	0.917001
YDL015C	0.532191		YDL015C	0.274533										YDL015C	0.009315	-0.246024	-0.18406	-0.090968
YDL017W	0.0477452		YDL017W	0.274069										YDL017W	-0.481787	0.247903	-0.560071	0.668957
YDL018C	0.442032		YDL018C	0.393194										YDL018C	-0.052747	0.09534	-0.577679	0.562935
YDL019C	0.539751		YDL019C	0.432192										YDL019C	-0.008764	-0.158363	0.140175	-1.48117
YDL020C	0.606557		YDL020C	0.0229968										YDL020C	0.142446	-0.161026	-0.843078	-0.173101
YDL021W	0.215061		YDL021W	0.476139										YDL021W	-0.611141	-0.045459	-0.293394	-1.21231
YDL022W	0.652656		YDL022W	0.362501										YDL022W	0.134436	-0.543357	-0.54985	-2.47651
YDL024C	0.492544		YDL024C	0.557038										YDL024C	-1.5924	0.073209	-0.018652	-0.814916
YDL025C	0.838379		YDL025C	0.292307										YDL025C	0.314803	-0.297819	-0.535409	-0.880256
YDL027C	0.112157		YDL027C	0.0817028										YDL027C	-0.350337	-1.00148	-0.502086	-1.29826
YDL028C	0.766228		YDL028C	0.695764										YDL028C	0.060846	-0.124975	-0.136916	0.393525
YDL029W	0.718365		YDL029W	0.16524										YDL029W	0.467087	-0.365505	-0.166808	-0.62981
YDL030W	0.357008		YDL030W	0.11395										YDL030W	0.647466	0.373462	0.147924	0.538453
YDL031W	0.0401757		YDL031W	0.100412										YDL031W	0.411041	0.568217	0.466494	0.783148
YDL033C	0.389246		YDL033C	0.185195										YDL033C	0.053768	0.197271	0.305937	0.365875
YDL035C	0.910657		YDL035C	0.0827532										YDL035C	0.323809	-0.055124	-0.243646	-0.042378
YDL036C	0.269766		YDL036C	0.19634										YDL036C	0.622158	0.400908	0.235355	0.775768
YDL037C	0.69901		YDL037C	0.666183										YDL037C	-3.26442	-0.758519	1.05506	2.83946
YDL038C	0.796246		YDL038C	0.728281										YDL038C	-3.17783	-1.21085	1.59565	3.23078
YDL039C	0.888001		YDL039C	0.606141										YDL039C	-1.06289	-0.518275	1.52248	3.07968
YDL040C	0.525654		YDL040C	0.495912										YDL040C	0.583783	0.540536	-0.023538	0.003471
YDL042C	0.381963		YDL042C	0.378707										YDL042C	0.072945	0.111961	0.388903	0.58051
YDL043C	0.874199		YDL043C	0.454055										YDL043C	-0.286929	0.068872	0.430592	0.952644
YDL044C	0.6463		YDL044C	0.663532										YDL044C	-0.678968	-0.583968	0.158838	0.153396
YDL045C	0.841234		YDL045C	0.999068										YDL045C	0.411102	0.362174	-0.244202	-0.363236
YDL045W-A	0.736633		YDL045W-A	0.85819										YDL045W-A	-0.143673	0.121488	0.368559	-0.076615
YDL046W	0.423977		YDL046W	0.0480208										YDL046W	0.523793	-0.689143	0.062849	-0.592299
YDL047W	0.389812		YDL047W	0.0512003										YDL047W	1.23267	0.604961	0.215512	0.514716
YDL048C	0.132158		YDL048C	0.381032										YDL048C	0.644392	0.064195	0.988277	0.33951
YDL049C	0.0610626		YDL049C	0.569718										YDL049C	-0.256584	-0.487981	-0.311213	0.053655
YDL051W	0.310318		YDL051W	0.206142										YDL051W	0.661647	0.63892	0.203188	1.28444
YDL052C	0.366912		YDL052C	0.993747										YDL052C	0.607893	-0.079845	0.128967	0.081429
YDL053C	0.577461		YDL053C	0.906172										YDL053C	0.035067	-0.311767	-0.286776	0.231163
YDL054C	0.806366		YDL054C	0.24109										YDL054C	0.27123	-0.218996	-0.519413	-0.508456
YDL055C	0.0387313		YDL055C	0.171277										YDL055C	0.128273	0.963127	0.113543	0.5468
YDL056W	0.662624		YDL056W	0.350193										YDL056W	0.104065	0.061015	-0.027177	0.254485
YDL057W	0.00781614		YDL057W	0.143032										YDL057W	-0.072441	-0.221146	-0.074242	-0.352166
YDL058W	0.703395		YDL058W	0.7606										YDL058W	0.638685	0.65847	-0.211294	-0.285682
YDL059C	0.223251		YDL059C	0.448116										YDL059C	-0.651997	0.516225	-0.30275	0.042165
YDL060W	0.00667382		YDL060W	0.316469										YDL060W	0.551527	0.349852	0.540083	1.17974
YDL061C	0.446572		YDL061C	0.801915										YDL061C	-0.00566287	-0.471357	-0.000476377	0.241957
YDL063C	0.0101653		YDL063C	0.575671										YDL063C	0.558262	-0.182413	0.576381	1.52741
YDL064W	0.154097		YDL064W	0.655179										YDL064W	0.421646	-0.198927	0.254667	0.799866
YDL065C	0.457643		YDL065C	0.470011										YDL065C	-1.3996	1.10181	-0.09326	0.051941
YDL066W	0.985412		YDL066W	0.0864761										YDL066W	0.5563	-0.544634	-0.582397	-0.717083
YDL067C	0.323655		YDL067C	0.728238										YDL067C	0.85134	-0.49929	0.242046	0.187088
YDL069C	0.465764		YDL069C	0.955452										YDL069C	-1.29354	-0.231477	-0.06963	0.201154
YDL070W	0.495114		YDL070W	0.962803										YDL070W	-1.26407	0.617022	-0.009701	-0.693693
YDL072C	0.437542		YDL072C	0.263515										YDL072C	-0.012042	-0.310422	-0.122347	-0.796864
YDL073W	0.494072		YDL073W	0.240498										YDL073W	0.297383	0.423816	0.002769	0.183008
YDL074C	0.59969		YDL074C	0.455009										YDL074C	0.030291	0.016134	-0.191854	0.227917
YDL075W	0.486429		YDL075W	0.791125										YDL075W	-0.409195	-0.417944	-0.008724	0.205665
YDL076C	0.35093		YDL076C	0.21243										YDL076C	-0.155222	-0.350606	-0.650734	-0.722644
YDL077C	0.428309		YDL077C	0.0316144										YDL077C	0.03957	-0.378637	0.004475	-0.342782
YDL078C	0.803403		YDL078C	0.512817										YDL078C	0.143926	0.016436	-0.278777	-0.816273
YDL079C	0.515783		YDL079C	0.446001										YDL079C	0.026713	0.588932	-1.07728	0.050074
YDL080C	0.269371		YDL080C	0.313458										YDL080C	-0.263273	-0.328331	-0.09978	-0.099059
YDL081C	0.822089		YDL081C	0.998845										YDL081C	0.477172	-0.138609	-0.26437	0.138107
YDL082W	0.358626		YDL082W	0.795313										YDL082W	1.12229	-0.440765	0.253406	0.881024
YDL083C	0.549635		YDL083C	0.747642										YDL083C	0.235955	-0.164283	-0.018434	0.400807
YDL084W	0.888241		YDL084W	0.890023										YDL084W	0.212237	0.083222	-0.303763	-0.118404
YDL085C-A	0.600579		YDL085C-A	0.399942										YDL085C-A	0.116694	-0.111806	-0.732464	-0.705502
YDL085W	0.701007		YDL085W	0.0645377										YDL085W	-0.93592	-0.50959	0.305736	-0.625006
YDL086W	0.0976775		YDL086W	0.719707										YDL086W	0.588837	0.434531	0.431106	-1.2087
YDL087C	0.498009		YDL087C	0.84659										YDL087C	-1.45474	-0.01795	-0.004549	0.029647
YDL088C	0.662711		YDL088C	0.248052										YDL088C	0.385043	0.381931	-0.100612	0.159572
YDL089W	0.443247		YDL089W	0.181829										YDL089W	-0.681118	-0.547952	-0.060881	-0.299192
YDL090C	0.25951		YDL090C	0.00679818										YDL090C	0.041689	-0.261496	0.016543	-0.25597
YDL091C	0.31462		YDL091C	0.673911										YDL091C	-0.493064	0.20135	-0.147778	-0.718638
YDL092W	0.805228		YDL092W	0.85056										YDL092W	0.074527	-0.415268	-0.143345	0.254979
YDL093W	0.418521		YDL093W	0.659903										YDL093W	0.366576	-0.080748	0.047175	0.314691
YDL095W	0.376172		YDL095W	0.251629										YDL095W	0.796653	-0.279863	0.15694	-0.115085
YDL097C	0.599017		YDL097C	0.650649										YDL097C	0.033917	0.186331	-0.216305	-0.772653
YDL098C	0.35458		YDL098C	0.710589										YDL098C	-0.141959	-0.10567	-0.033003	0.307707
YDL099W	0.484082		YDL099W	0.648743										YDL099W	-0.246584	0.143341	-0.006167	-0.034114
YDL100C	0.309431		YDL100C	0.268481										YDL100C	0.840277	0.252595	0.259325	0.096137
YDL101C	0.00490101		YDL101C	0.596857										YDL101C	-0.163372	-0.221253	-0.165907	1.44302
YDL102W	0.568807		YDL102W	0.378994										YDL102W	1.00961	0.111225	-0.109547	0.578098
YDL103C	0.561531		YDL103C	0.982363										YDL103C	0.563069	-0.162792	-0.054592	0.154013
YDL104C	0.649591		YDL104C	0.639476										YDL104C	-1.61928	1.62416	0.387656	-0.361641
YDL105W	0.290761		YDL105W	0.43464										YDL105W	-2.26871	-0.035221	-0.773724	-0.341855
YDL106C	0.897825		YDL106C	0.676001										YDL106C	0.490491	0.442956	-0.679977	-0.125679
YDL107W	0.14215		YDL107W	0.722383										YDL107W	-0.377201	0.197635	-0.598834	-0.542572
YDL108W	0.613347		YDL108W	0.17956										YDL108W	-0.072731	0.402036	0.013088	0.221383
YDL109C	0.874068		YDL109C	0.484584										YDL109C	-1.06498	0.005757	0.709342	0.237701
YDL110C	0.453147		YDL110C	0.195114										YDL110C	-0.079793	-0.927093	-1.08225	-1.78551
YDL111C	0.45227		YDL111C	0.518577										YDL111C	0.041558	-0.023988	0.553257	0.821825
YDL112W	0.0945903		YDL112W	0.257557										YDL112W	0.456348	0.334731	0.337518	0.836047
YDL113C	0.524532		YDL113C	0.301219										YDL113C	0.032622	-0.442865	-0.846142	-1.37193
YDL114W	0.335319		YDL114W	0.680885										YDL114W	-2.12007	0.227151	-0.560989	-0.777823
YDL115C	0.0474276		YDL115C	0.108997										YDL115C	-0.327379	-0.106696	-0.38019	-0.151306
YDL116W	0.774967		YDL116W	0.089877										YDL116W	0.169667	0.359632	-0.078207	0.270128
YDL117W	0.486437		YDL117W	0.726228										YDL117W	0.00738	-0.702562	0.346358	0.26073
YDL119C	0.424296		YDL119C	0.437907										YDL119C	-0.513364	-0.065909	-0.061336	-0.673605
YDL120W	0.623003		YDL120W	0.979801										YDL120W	0.268249	-0.794322	-0.052484	0.745452
YDL121C	0.098661		YDL121C	0.428974										YDL121C	0.122775	0.093833	0.16824	0.837545
YDL122W	0.845337		YDL122W	0.994982										YDL122W	-0.106881	-0.710363	0.177316	0.699251
YDL123W	0.307424		YDL123W	0.376815										YDL123W	-0.108666	-0.191947	-0.033912	-0.979568
YDL124W	0.428829		YDL124W	0.388622										YDL124W	-0.225203	-0.282468	-0.025282	-1.59803
YDL125C	0.179952		YDL125C	0.429349										YDL125C	0.211197	-0.120531	0.384097	-1.08161
YDL126C	0.581875		YDL126C	0.758038										YDL126C	0.330458	0.394253	-0.042736	-0.918825
YDL127W	0.267462		YDL127W	0.640672										YDL127W	-1.22304	-0.32483	-0.46773	1.44603
YDL128W	0.0702664		YDL128W	0.890164										YDL128W	0.443685	0.315833	0.355154	-0.449139
YDL129W	0.672626		YDL129W	0.597398										YDL129W	-0.756402	-0.099762	0.210286	0.646973
YDL130W-A	0.450128		YDL130W-A	0.110486										YDL130W-A	-0.589801	-0.695634	-0.046299	-0.991395
YDL130W	0.475		YDL130W	0.663716										YDL130W	0.092187	-0.857017	0.003622	0.225385
YDL131W	0.870696		YDL131W	0.801689										YDL131W	0.165416	0.146966	-0.108917	-0.286555
YDL132W	0.777082		YDL132W	0.620323										YDL132W	0.678636	0.194785	-0.31555	-1.01829
YDL133W	0.341734		YDL133W	0.474659										YDL133W	-0.12813	-0.016853	-0.504736	-0.423156
YDL134C	0.452775		YDL134C	0.870662										YDL134C	0.464822	0.443108	0.034544	-0.291728
YDL135C	0.584389		YDL135C	0.704636										YDL135C	0.06009	-0.081392	-0.450651	0.244428
YDL137W	0.659308		YDL137W	0.436756										YDL137W	0.047485	-0.05265	-0.18578	-0.528237
YDL138W	0.0282075		YDL138W	0.994618										YDL138W	0.504005	0.5487	0.46121	-0.558057
YDL139C	0.334536		YDL139C	0.140186										YDL139C	-0.851192	-0.392473	-0.226354	-0.24891
YDL140C	0.188181		YDL140C	0.455747										YDL140C	0.85168	0.660271	1.59749	0.045971
YDL141W	0.375416		YDL141W	0.0144666										YDL141W	0.980742	0.095887	0.194415	0.100347
YDL142C	0.141393		YDL142C	0.0248776										YDL142C	-0.218734	-0.512027	-0.346342	-0.553694
YDL143W	0.374885		YDL143W	0.881961										YDL143W	0.492562	-0.102127	0.098069	0.149284
YDL144C	0.181966		YDL144C	0.208701										YDL144C	0.264511	-0.313774	0.484683	-0.154511
YDL145C	0.420664		YDL145C	0.890294										YDL145C	-0.091115	0.114038	-0.011414	-0.080226
YDL146W	9.49987e-05		YDL146W	0.211003										YDL146W	-0.867696	-0.508805	-0.867955	-1.04276
YDL147W	0.918211		YDL147W	0.0287485										YDL147W	0.246363	-0.468428	-0.189992	-0.512767
YDL148C	0.0952456		YDL148C	0.400833										YDL148C	0.343375	0.179874	0.253416	1.14538
YDL149W	0.0414498		YDL149W	0.243525										YDL149W	-0.329454	-0.444834	-0.289122	-1.04377
YDL150W	0.125079		YDL150W	0.385684										YDL150W	0.437705	0.240646	0.292387	1.32571
YDL153C	0.601696		YDL153C	0.361992										YDL153C	0.545552	0.232597	-0.087897	1.05609
YDL154W	0.394586		YDL154W	0.756811										YDL154W	-0.804502	-0.183078	-0.134444	0.42895
YDL155W	0.852136		YDL155W	0.931863										YDL155W	0.027524	-0.532334	-0.016994	0.429044
YDL156W	0.649403		YDL156W	0.0887232										YDL156W	-0.569032	0.260368	0.136048	0.345333
YDL157C	0.0206977		YDL157C	0.661481										YDL157C	-0.251944	-0.251938	-0.268883	0.971843
YDL159W-A	0.515047		YDL159W-A	0.924147										YDL159W-A	-2.3035	0.351195	0.054454	-0.446719
YDL159W	0.717636		YDL159W	0.00974944										YDL159W	-0.04317	0.08252	0.121321	0.085087
YDL160C-A	0.0999182		YDL160C-A	0.942365										YDL160C-A	-0.567362	-0.443297	-0.412324	0.531819
YDL160C	0.223893		YDL160C	0.106326										YDL160C	-1.09019	-0.596806	-0.504885	-0.838838
YDL161W	0.868247		YDL161W	0.970205										YDL161W	0.146489	0.081426	-0.224352	-0.089428
YDL164C	0.81085		YDL164C	0.092526										YDL164C	0.246769	0.740048	-0.464564	0.99384
YDL165W	0.27264		YDL165W	0.663924										YDL165W	-0.09974	-0.456676	-0.267302	0.12026
YDL166C	0.131231		YDL166C	0.250268										YDL166C	0.48085	0.385704	0.31453	0.932282
YDL167C	0.0124374		YDL167C	0.423572										YDL167C	0.802283	0.164265	0.771532	1.36169
YDL168W	0.507257		YDL168W	0.666445										YDL168W	0.977723	0.513887	-0.011146	-0.137504
YDL169C	0.38606		YDL169C	0.373188										YDL169C	-0.193144	-0.232361	-1.06761	-1.15103
YDL170W	0.00960438		YDL170W	0.238519										YDL170W	-0.216101	-0.999104	-0.209677	-0.435113
YDL171C	0.244023		YDL171C	0.775605										YDL171C	0.344435	-0.22634	0.809948	0.489744
YDL173W	0.543996		YDL173W	0.926										YDL173W	0.66208	0.284385	-0.045829	-0.359577
YDL174C	0.746124		YDL174C	0.891393										YDL174C	0.854492	0.952771	-0.347863	-0.672737
YDL175C	0.297039		YDL175C	0.977546										YDL175C	-0.746327	0.211165	-0.24634	-0.226612
YDL176W	0.641862		YDL176W	0.407194										YDL176W	0.066381	0.684143	-0.292944	0.100446
YDL177C	0.649099		YDL177C	0.200697										YDL177C	-0.119078	0.168664	0.02841	0.331919
YDL178W	0.312697		YDL178W	0.0458003										YDL178W	0.768796	0.282598	0.232952	0.244604
YDL179W	0.674667		YDL179W	0.179791										YDL179W	-0.986615	-0.325814	0.277698	-0.179257
YDL180W	0.468481		YDL180W	0.783616										YDL180W	-0.021288	-0.075474	-0.429627	0.158054
YDL181W	0.339717		YDL181W	0.059726										YDL181W	0.521661	-0.467603	0.134187	-0.387174
YDL182W	0.783398		YDL182W	0.836327										YDL182W	0.054649	0.519774	-0.114544	-0.30336
YDL183C	0.501881		YDL183C	0.83481										YDL183C	0.00017	0.098398	-0.057544	-0.169521
YDL184C	0.133562		YDL184C	0.804022										YDL184C	-0.281616	-0.500786	-0.18274	0.259161
YDL185W	0.633772		YDL185W	0.66847										YDL185W	0.250084	0.098313	-0.053337	-0.362795
YDL186W	0.38563		YDL186W	0.367119										YDL186W	-3.53231	-0.196553	-0.641503	-0.927954
YDL188C	0.540997		YDL188C	0.00852515										YDL188C	0.487397	-0.481835	-0.031431	-0.4691
YDL189W	0.656735		YDL189W	0.786747										YDL189W	0.108688	-0.174509	-0.027313	0.084388
YDL190C	0.648079		YDL190C	0.826736										YDL190C	0.384466	0.484102	-0.091076	-0.272847
YDL191W	0.619429		YDL191W	0.670246										YDL191W	-0.365963	-0.081061	0.069471	0.29586
YDL192W	0.604686		YDL192W	0.593097										YDL192W	0.025991	-0.670674	-0.15663	0.098782
YDL193W	0.486291		YDL193W	0.811035										YDL193W	0.392104	0.184555	0.008445	-0.347197
YDL194W	0.912318		YDL194W	0.156038										YDL194W	0.180277	-0.10326	-0.136385	-0.172149
YDL195W	0.0825042		YDL195W	0.762542										YDL195W	0.714461	0.694011	0.549705	-0.303621
YDL197C	0.798524		YDL197C	0.249343										YDL197C	0.129659	0.088845	-0.255935	0.213866
YDL198C	0.627606		YDL198C	0.552878										YDL198C	1.05684	0.075969	-0.21472	-0.912512
YDL199C	0.205218		YDL199C	0.48903										YDL199C	-0.587178	-0.021739	-0.293145	-1.26146
YDL200C	0.36461		YDL200C	0.692661										YDL200C	-0.517581	0.062153	-0.111764	-0.199067
YDL201W	0.15561		YDL201W	0.214552										YDL201W	0.279028	0.524284	0.464471	1.08985
YDL202W	0.8409		YDL202W	0.663335										YDL202W	-0.130729	-0.581221	0.220339	0.152482
YDL203C	0.151745		YDL203C	0.548										YDL203C	0.32438	-0.01525	0.197559	0.201874
YDL204W	0.362427		YDL204W	0.377788										YDL204W	-1.43305	-1.07787	-0.314592	-0.209498
YDL205C	0.286572		YDL205C	0.329463										YDL205C	-1.87203	-0.403882	-0.652222	-1.47147
YDL206W	0.0654025		YDL206W	0.367724										YDL206W	-0.660818	-0.285399	-0.537296	-1.35375
YDL207W	0.573503		YDL207W	0.546138										YDL207W	0.646385	-0.006843	-0.074964	0.094256
YDL208W	0.622329		YDL208W	0.45904										YDL208W	-0.098336	0.08167	0.505444	1.26761
YDL209C	0.197136		YDL209C	0.957411										YDL209C	-0.109963	-0.274656	-0.213435	0.314102
YDL210W	0.319041		YDL210W	0.878823										YDL210W	-1.05978	0.68027	-0.309627	-0.460475
YDL211C	0.723976		YDL211C	0.606851										YDL211C	-0.755817	-0.202356	0.277455	1.1943
YDL212W	0.238929		YDL212W	0.777402										YDL212W	0.506593	-0.662444	0.220235	0.308427
YDL213C	0.808227		YDL213C	0.256149										YDL213C	-0.263785	0.463097	0.501577	1.14929
YDL214C	0.5		YDL214C	0.944765										YDL214C	0.18201	0.558215	0	-0.468877
YDL215C	0.689183		YDL215C	0.312021										YDL215C	0.071822	-0.376361	-0.234532	-0.114477
YDL216C	0.35613		YDL216C	0.246842										YDL216C	-0.253721	-0.446582	-1.10353	-1.0632
YDL217C	0.22469		YDL217C	0.794951										YDL217C	0.32334	-0.649883	0.149253	0.324665
YDL218W	0.458205		YDL218W	0.184836										YDL218W	-1.98536	-0.447492	-0.130528	-0.241602
YDL219W	0.828677		YDL219W	0.114803										YDL219W	-0.020754	0.158975	0.036562	0.109947
YDL220C	0.60481		YDL220C	0.32807										YDL220C	-0.269233	0.270479	0.04473	0.074877
YDL222C	0.696559		YDL222C	0.670659										YDL222C	-1.55662	-0.8036	0.49649	0.220734
YDL223C	0.965165		YDL223C	0.305775										YDL223C	-1.02184	-1.34735	0.915718	-0.424307
YDL224C	0.427252		YDL224C	0.143151										YDL224C	0.473931	-0.131786	0.054394	-0.209951
YDL225W	0.079186		YDL225W	0.813618										YDL225W	-0.239361	0.429145	-0.307769	-0.230353
YDL226C	0.487786		YDL226C	0.408822										YDL226C	0.876771	0.228217	0.016823	0.032911
YDL227C	0.00723731		YDL227C	0.236166										YDL227C	1.79201	3.42762	1.75172	1.50784
YDL229W	0.409279		YDL229W	0.0967209										YDL229W	0.304713	0.293239	0.0437193	0.215367
YDL230W	0.230162		YDL230W	0.610004										YDL230W	-0.315342	0.104559	-0.142286	-0.599075
YDL231C	0.38215		YDL231C	0.879128										YDL231C	-1.04774	0.213815	-0.196202	-0.144881
YDL232W	0.917891		YDL232W	0.667785										YDL232W	-0.116676	-0.710392	0.151451	0.191687
YDL233W	0.576222		YDL233W	0.444921										YDL233W	0.265009	0.320474	-0.031882	0.027796
YDL234C	0.99136		YDL234C	0.258026										YDL234C	0.595617	-0.289446	-0.579665	-0.724487
YDL235C	0.417873		YDL235C	0.144395										YDL235C	0.794647	0.026681	0.103086	0.016675
YDL236W	0.327711		YDL236W	0.722173										YDL236W	1.03099	-0.07236	0.286035	0.198855
YDL237W	0.455889		YDL237W	0.29636										YDL237W	0.675298	-0.273232	0.046866	-0.824844
YDL238C	0.342051		YDL238C	0.414579										YDL238C	-1.18035	-0.141005	-0.299011	-1.04456
YDL239C	0.350992		YDL239C	0.303558										YDL239C	-1.35395	-0.395687	-0.322825	-1.24136
YDL240W	0.528928		YDL240W	0.526976										YDL240W	0.524446	-0.805417	-0.023847	0.034149
YDL241W	0.870378		YDL241W	0.553509										YDL241W	-1.11881	0.047763	0.735871	-0.566923
YDL243C	0.32616		YDL243C	0.465876										YDL243C	-0.954366	-0.040418	-0.267283	-0.753318
YDL244W	0.607763		YDL244W	0.110388										YDL244W	-1.92251	-0.634451	0.328574	-0.903902
YDL245C	0.521173		YDL245C	0.289417										YDL245C	-3.5098	-0.645383	0.116772	-0.221625
YDL246C	0.50572		YDL246C	0.432218										YDL246C	-1.6152	-0.026945	0.014514	-0.252115
YDL247W	0.422498		YDL247W	0.207097										YDL247W	-2.33586	-1.21592	-0.28578	-0.602563
YDL248W	0.248205		YDL248W	0.0908376										YDL248W	-0.883071	-0.690177	-0.3687	-0.516781
YDR001C	0.837256		YDR001C	0.314332										YDR001C	0.279409	-0.182356	-0.477137	-0.607434
YDR002W	0.476927		YDR002W	0.806174										YDR002W	0.339638	-0.271141	0.012315	0.519623
YDR003W-A	0.591441		YDR003W-A	0.788667										YDR003W-A	0.142818	0.350695	-0.987459	-0.719667
YDR003W	0.248384		YDR003W	0.718935										YDR003W	-0.287437	0.780339	-0.688981	-0.279465
YDR004W	0.495098		YDR004W	0.154157										YDR004W	-0.536089	0.454789	-0.004128	0.274626
YDR005C	0.202091		YDR005C	0.467373										YDR005C	-0.681977	-0.007734	-0.344668	-0.150776
YDR006C	0.786376		YDR006C	0.884268										YDR006C	-0.53897	-0.231375	0.260245	0.335596
YDR009W	0.226699		YDR009W	0.793971										YDR009W	0.260301	0.398432	0.119159	-0.80062
YDR011W	0.317023		YDR011W	0.663539										YDR011W	0.517987	0.204205	0.153119	-0.77736
YDR012W	0.687685		YDR012W	0.614502										YDR012W	-0.556984	-0.022765	0.169136	0.125203
YDR013W	0.484158		YDR013W	0.560677										YDR013W	-0.00679	-0.058574	-0.272796	0.612696
YDR014W	0.560368		YDR014W	0.613176										YDR014W	-0.278801	-0.137908	0.026517	0.767548
YDR016C	0.0512569		YDR016C	0.492272										YDR016C	-0.611606	-0.856502	-0.520276	-0.010398
YDR017C	0.667216		YDR017C	0.26743										YDR017C	0.144157	0.245821	-0.03876	0.094024
YDR018C	0.243066		YDR018C	0.426876										YDR018C	-0.214261	-0.082105	-0.501744	-0.711667
YDR019C	0.667356		YDR019C	0.560284										YDR019C	0.083905	0.350126	-0.311786	-0.033254
YDR020C	0.63939		YDR020C	0.96351										YDR020C	-0.828773	-0.619096	0.184419	0.69447
YDR021W	0.943468		YDR021W	0.497027										YDR021W	-0.307483	0.006905	0.367588	1.4787
YDR022C	0.436008		YDR022C	0.110645										YDR022C	-1.29931	-0.899667	-0.131047	-0.630936
YDR023W	0.487165		YDR023W	0.447892										YDR023W	0.4326	0.035966	0.008723	0.438425
YDR025W	0.754497		YDR025W	0.90388										YDR025W	-0.284175	-0.593886	0.120068	0.437038
YDR026C	0.864416		YDR026C	0.543848										YDR026C	-0.066924	-0.008907	0.103856	0.129114
YDR027C	0.780131		YDR027C	0.353352										YDR027C	0.067475	-0.157119	-0.143315	-0.669968
YDR028C	0.762133		YDR028C	0.941085										YDR028C	0.679827	0.137612	-0.296896	-0.114238
YDR030C	0.449662		YDR030C	0.658736										YDR030C	-1.3419	0.053488	-0.106327	-0.210052
YDR031W	0.251878		YDR031W	0.111003										YDR031W	-0.249139	-0.579057	-0.60653	-0.826681
YDR032C	0.70145		YDR032C	0.209128										YDR032C	0.484639	-0.448989	-0.15869	-0.913333
YDR033W	0.0479402		YDR033W	0.376253										YDR033W	0.25176	-0.694553	0.216436	-0.136735
YDR034C-A	0.36021		YDR034C-A	0.281721										YDR034C-A	-3.78362	-0.399369	-0.844431	-0.142563
YDR034C	0.375955		YDR034C	0.147661										YDR034C	-0.03088	-0.06993	-0.156471	-0.11318
YDR034W-B	0.138727		YDR034W-B	0.0365573										YDR034W-B	-1.08711	-0.559203	-0.692957	-0.498404
YDR035W	0.718945		YDR035W	0.277362										YDR035W	0.513215	-0.38965	-0.183809	-1.06838
YDR036C	0.734361		YDR036C	0.096544										YDR036C	-0.453643	-0.248723	0.174978	-0.182779
YDR037W	0.359386		YDR037W	0.884941										YDR037W	0.534215	-0.212599	0.119952	0.146907
YDR038C	0.657199		YDR038C	0.611363										YDR038C	0.115955	0.095186	-0.460007	-0.53858
YDR041W	0.850508		YDR041W	0.116126										YDR041W	0.069241	-0.550274	-0.112789	-0.799199
YDR042C	0.575771		YDR042C	0.700198										YDR042C	-2.01352	-0.246408	0.240788	0.757566
YDR043C	0.256883		YDR043C	0.202704										YDR043C	-2.00035	-0.766556	-0.803344	-1.52038
YDR044W	0.0481182		YDR044W	0.895615										YDR044W	0.91849	-0.207349	0.789172	0.289565
YDR045C	0.210445		YDR045C	0.95143										YDR045C	0.103178	-0.664201	0.050457	0.774152
YDR046C	0.146069		YDR046C	0.292607										YDR046C	0.785403	0.364841	1.26407	1.08002
YDR047W	0.0158102		YDR047W	0.696359										YDR047W	0.322411	-0.225453	0.306782	0.071831
YDR049W	0.616858		YDR049W	0.186608										YDR049W	-0.846408	0.204091	0.157136	0.380544
YDR050C	0.525253		YDR050C	0.717644										YDR050C	0.284927	0.134554	-0.011308	-0.378123
YDR051C	0.558965		YDR051C	0.669766										YDR051C	0.278582	0.541988	-0.025877	-0.148057
YDR052C	0.521739		YDR052C	0.733355										YDR052C	-0.286268	-0.214015	0.009779	0.557472
YDR054C	0.924426		YDR054C	0.169703										YDR054C	0.140949	0.162482	-0.179125	0.284553
YDR055W	0.765562		YDR055W	0.0361048										YDR055W	0.19575	-0.349946	-0.086747	-0.312345
YDR056C	0.0945726		YDR056C	0.0895646										YDR056C	0.264678	-0.173698	0.195769	-0.130602
YDR057W	0.172862		YDR057W	0.167417										YDR057W	-0.353751	-0.346789	-0.199674	-0.199674
YDR058C	0.547736		YDR058C	0.634213										YDR058C	0.020359	0.064415	-0.271005	-0.301003
YDR059C	0.534879		YDR059C	0.0274767										YDR059C	-0.014234	-0.886414	0.259539	-0.966433
YDR060W	0.43143		YDR060W	0.0592403										YDR060W	0.046491	1.01468	0.429965	1.22356
YDR061W	0.782723		YDR061W	0.80711										YDR061W	0.440428	0.119735	-0.209555	-0.228644
YDR062W	0.547257		YDR062W	0.131246										YDR062W	0.506357	0.358951	-0.037657	0.234782
YDR063W	0.491154		YDR063W	0.23424										YDR063W	-0.418028	-0.386625	-0.005809	-0.871712
YDR064W	0.571737		YDR064W	0.964507										YDR064W	0.071657	-0.284588	-0.008109	0.318231
YDR065W	0.605776		YDR065W	0.912867										YDR065W	-1.24362	-0.600419	0.208553	0.45505
YDR066C	0.590865		YDR066C	0.618715										YDR066C	-1.40724	-0.038988	0.20223	0.206647
YDR067C	0.285869		YDR067C	0.43804										YDR067C	-0.791496	-0.43294	-0.276741	-0.04227
YDR068W	0.336489		YDR068W	0.0390707										YDR068W	-0.17156	0.333812	-0.045059	0.295162
YDR069C	0.983984		YDR069C	0.443717										YDR069C	0.218412	-0.090186	-0.20769	-1.01743
YDR070C	0.765213		YDR070C	0.395136										YDR070C	-1.85791	-1.12149	0.822117	-0.186421
YDR071C	0.845512		YDR071C	0.0136535										YDR071C	0.25715	-0.286674	-0.155099	-0.299242
YDR072C	0.353555		YDR072C	0.965407										YDR072C	0.601983	0.410712	0.140973	-0.368338
YDR073W	0.168757		YDR073W	0.339188										YDR073W	-0.701864	-0.070064	-0.402155	-0.271444
YDR074W	0.554029		YDR074W	0.279431										YDR074W	0.05135	-0.617414	-0.603598	-1.71014
YDR075W	0.454435		YDR075W	0.079348										YDR075W	0.0395	0.733544	0.550941	0.943682
YDR076W	0.39059		YDR076W	0.204052										YDR076W	-1.69112	-0.225322	-0.293533	-0.449266
YDR077W	0.879894		YDR077W	0.40318										YDR077W	0.181741	-0.04366	-0.123467	-0.28486
YDR078C	0.435004		YDR078C	0.110705										YDR078C	-0.983016	-0.293159	-0.100712	-0.418107
YDR079C-A	0.219551		YDR079C-A	0.804566										YDR079C-A	0.330415	0.085038	0.155766	-0.163978
YDR079W	0.667331		YDR079W	0.192001										YDR079W	-0.264183	-0.370403	0.071083	-0.19463
YDR080W	0.790189		YDR080W	0.427028										YDR080W	-0.553652	1.17508	0.271435	0.135286
YDR081C	0.51684		YDR081C	0.401004										YDR081C	-0.004325	0.04739	0.163462	0.302292
YDR082W	0.280107		YDR082W	0.58233										YDR082W	-1.25537	-0.57806	-0.451721	0.075176
YDR083W	0.166911		YDR083W	0.201704										YDR083W	0.674324	0.697955	0.388976	1.37893
YDR084C	0.274247		YDR084C	0.0593758										YDR084C	-0.378657	-0.714621	-0.140203	-0.592367
YDR085C	0.215914		YDR085C	0.702263										YDR085C	-0.158992	0.186583	-0.332322	-0.567374
YDR086C	0.262129		YDR086C	0.498141										YDR086C	-0.434296	-0.737837	-0.170272	-0.002154
YDR087C	0.0638085		YDR087C	0.415645										YDR087C	0.414894	0.174934	0.507674	1.31248
YDR088C	0.123685		YDR088C	0.207612										YDR088C	-0.156555	0.026839	-0.105075	0.054269
YDR089W	0.383085		YDR089W	0.0271558										YDR089W	-0.143904	-0.117315	-0.774752	-0.127776
YDR090C	0.0253947		YDR090C	0.297329										YDR090C	-0.168534	-0.373365	-0.182546	-0.123048
YDR091C	0.0316348		YDR091C	0.591572										YDR091C	0.786655	-0.206605	0.712117	1.42642
YDR092W	0.592745		YDR092W	0.0914962										YDR092W	-0.701795	-0.194833	0.102969	-0.14557
YDR093W	0.373112		YDR093W	0.344885										YDR093W	1.03771	0.967424	0.209616	0.240495
YDR096W	0.254326		YDR096W	0.384445										YDR096W	-0.191292	-0.179837	-0.470845	-0.97986
YDR097C	0.949321		YDR097C	0.16132										YDR097C	0.450599	0.497258	-0.384018	0.84481
YDR098C	0.809277		YDR098C	0.97826										YDR098C	0.18666	-0.283442	-0.09856	0.303493
YDR099W	0.659767		YDR099W	0.287825										YDR099W	0.06826	-0.18375	-0.26626	-0.530767
YDR100W	0.876297		YDR100W	0.151399										YDR100W	0.176925	-0.403513	-0.263623	-0.661733
YDR101C	0.0326355		YDR101C	0.476579										YDR101C	0.750883	0.044946	0.67759	1.22117
YDR103W	0.448352		YDR103W	0.560592										YDR103W	-0.882636	0.83143	-0.071765	-0.079374
YDR104C	0.354608		YDR104C	0.529629										YDR104C	1.10515	0.611568	0.256876	-0.028484
YDR105C	0.834091		YDR105C	0.977132										YDR105C	0.102211	0.226966	-0.176549	-0.211219
YDR106W	0.313552		YDR106W	0.383775										YDR106W	-2.41737	-0.8593	-0.72894	-0.158645
YDR107C	0.232603		YDR107C	0.404672										YDR107C	-0.851064	-0.094923	-0.380089	-0.629171
YDR108W	0.681982		YDR108W	0.441788										YDR108W	0.483094	0.349476	-0.141984	0.032045
YDR109C	0.729653		YDR109C	0.967661										YDR109C	-0.161682	-0.48434	0.428586	0.536228
YDR110W	0.350134		YDR110W	0.168414										YDR110W	0.095879	0.383554	0.399735	0.668565
YDR111C	0.614785		YDR111C	0.0169591										YDR111C	-0.100961	0.446667	0.553868	0.471122
YDR113C	0.291774		YDR113C	0.62639										YDR113C	-0.15415	-0.156533	-0.454362	0.778063
YDR115W	0.574987		YDR115W	0.727444										YDR115W	-0.522316	-0.539538	0.061809	0.201403
YDR116C	0.730941		YDR116C	0.0199619										YDR116C	0.088639	-0.185566	-0.233532	-0.174279
YDR117C	0.218328		YDR117C	0.527966										YDR117C	-0.295627	-0.00228	-0.140061	0.051869
YDR118W	0.0887769		YDR118W	0.0536803										YDR118W	-0.146981	0.273058	-0.194979	0.323478
YDR119W	0.297174		YDR119W	0.0880025										YDR119W	0.946959	0.53237	0.312339	0.704436
YDR120C	0.29497		YDR120C	0.824274										YDR120C	0.967375	-0.48174	0.322792	0.862514
YDR121W	0.471717		YDR121W	0.0453993										YDR121W	0.629169	0.256916	0.02797	0.222658
YDR122W	0.662964		YDR122W	0.484983										YDR122W	0.162946	-0.036592	-0.042647	-1.551
YDR123C	0.784896		YDR123C	0.807152										YDR123C	-0.332226	-0.142393	0.159466	0.271868
YDR124W	0.995467		YDR124W	0.42579										YDR124W	-0.246152	0.635451	0.249683	0.074411
YDR125C	0.399354		YDR125C	0.151347										YDR125C	-2.02887	-0.305108	-0.323453	-0.500264
YDR126W	0.251129		YDR126W	0.386747										YDR126W	-1.22084	-0.866874	-0.503155	-0.155862
YDR127W	0.539114		YDR127W	0.563507										YDR127W	0.181477	0.06417	-0.011164	-0.641133
YDR128W	0.61056		YDR128W	0.605489										YDR128W	0.647822	0.624073	-0.11365	-0.104367
YDR129C	0.537241		YDR129C	0.486073										YDR129C	0.589256	-0.01383	-0.03451	-0.632094
YDR130C	0.0791385		YDR130C	0.665264										YDR130C	-0.333289	-0.092325	-0.428475	0.347623
YDR131C	0.381555		YDR131C	0.283962										YDR131C	-0.600942	-0.119121	-0.113115	-0.337446
YDR132C	0.441521		YDR132C	0.282255										YDR132C	-0.028274	-0.295757	-0.306931	-0.105297
YDR135C	0.125017		YDR135C	0.765971										YDR135C	0.274234	0.394982	0.183227	-0.889758
YDR137W	0.177154		YDR137W	0.508727										YDR137W	-0.463834	-0.786782	-0.257702	0.010786
YDR138W	0.700033		YDR138W	0.0290875										YDR138W	0.144109	-0.075246	-0.443444	-0.068666
YDR139C	0.173712		YDR139C	0.52358										YDR139C	-0.072355	-0.288583	-0.128588	0.010694
YDR140W	0.57039		YDR140W	0.226364										YDR140W	-0.539364	0.233655	0.059881	0.509706
YDR141C	0.523016		YDR141C	0.269956										YDR141C	0.85502	-0.133861	-0.030925	-0.354178
YDR142C	0.377224		YDR142C	0.619972										YDR142C	-0.582624	-0.25063	-0.113777	0.047799
YDR143C	0.144131		YDR143C	0.0721367										YDR143C	0.165859	0.214143	0.265139	0.170384
YDR144C	0.585093		YDR144C	0.316048										YDR144C	-0.079936	0.246268	0.594469	0.828429
YDR145W	0.830844		YDR145W	0.0480215										YDR145W	0.199899	0.222864	-0.114372	0.259304
YDR146C	0.0393017		YDR146C	0.899171										YDR146C	-0.411111	0.341963	-0.465284	-0.247771
YDR147W	0.0918217		YDR147W	0.339268										YDR147W	-0.34483	-0.049546	-0.462018	-0.012782
YDR148C	0.384021		YDR148C	0.310227										YDR148C	0.515262	0.016024	0.094923	0.052153
YDR150W	0.906799		YDR150W	0.0238622										YDR150W	0.076339	-0.233706	-0.056719	-0.251917
YDR151C	0.122582		YDR151C	0.342459										YDR151C	-0.529618	-0.396196	-0.356796	-0.100096
YDR152W	0.444173		YDR152W	0.073715										YDR152W	0.424256	0.507839	0.0373	0.641523
YDR153C	0.466567		YDR153C	0.783792										YDR153C	-0.013764	0.148464	-0.261852	-0.070945
YDR155C	0.00731642		YDR155C	0.0446293										YDR155C	0.128626	-0.834428	0.131617	-0.724932
YDR156W	0.115987		YDR156W	0.784344										YDR156W	0.354408	-0.315045	0.244135	0.657815
YDR158W	0.475057		YDR158W	0.249865										YDR158W	0.310791	-0.218389	0.012183	-0.526921
YDR159W	0.788993		YDR159W	0.813743										YDR159W	-0.336116	0.126837	0.164003	-0.236185
YDR160W	0.451518		YDR160W	0.932956										YDR160W	0.027232	0.298743	0.356895	-0.241624
YDR161W	0.266893		YDR161W	0.0549625										YDR161W	0.932467	0.777308	0.35756	0.924609
YDR162C	0.0223744		YDR162C	0.548748										YDR162C	-0.265303	-0.782995	-0.284639	0.060074
YDR163W	0.267772		YDR163W	0.865048										YDR163W	-0.272646	-0.056964	-0.104116	0.088207
YDR164C	0.59728		YDR164C	0.729155										YDR164C	0.520656	0.588973	-0.080185	-0.221661
YDR165W	0.78771		YDR165W	0.628618										YDR165W	-0.968944	-0.288177	0.470366	1.40693
YDR166C	0.598722		YDR166C	0.122711										YDR166C	0.607927	0.211795	-0.095036	0.142621
YDR167W	0.299366		YDR167W	0.867153										YDR167W	-0.491797	-0.195318	-0.160336	0.300261
YDR168W	0.704087		YDR168W	0.710047										YDR168W	-0.013446	1.46494	0.040496	-0.501681
YDR169C-A	0.450874		YDR169C-A	0.12329										YDR169C-A	-2.53928	-0.451109	-0.196337	-0.303177
YDR169C	0.0861102		YDR169C	0.950259										YDR169C	-0.316554	0.655285	-0.240714	-0.560128
YDR170C	0.47872		YDR170C	0.794949										YDR170C	0.756929	0.344337	0.025311	-0.172021
YDR171W	0.296539		YDR171W	0.193481										YDR171W	-1.013	-0.791804	-3.06098	-0.413712
YDR172W	0.577166		YDR172W	0.986974										YDR172W	0.511306	-0.316199	-0.062282	0.329411
YDR173C	0.0626826		YDR173C	0.0893196										YDR173C	-0.666839	-0.372298	-0.813021	-0.280152
YDR174W	0.286949		YDR174W	0.650676										YDR174W	0.956806	-0.011452	0.33272	0.047479
YDR175C	0.710433		YDR175C	0.442897										YDR175C	0.590556	-0.025823	-0.202641	-0.287119
YDR176W	0.30617		YDR176W	0.684176										YDR176W	-0.240391	0.491896	-0.07554	-0.146415
YDR177W	0.807692		YDR177W	0.417725										YDR177W	0.137731	-0.54592	-0.262425	-0.070949
YDR178W	0.0358614		YDR178W	0.818425										YDR178W	0.537001	-0.433579	0.601184	0.236967
YDR179C	0.463972		YDR179C	0.480044										YDR179C	-0.021693	0.037197	-0.382905	1.18622
YDR179W-A	0.418966		YDR179W-A	0.755104										YDR179W-A	-1.08719	-0.269709	-0.139138	0.636651
YDR180W	0.934416		YDR180W	0.684845										YDR180W	0.027132	-0.10153	-0.033389	0.339794
YDR181C	0.0338881		YDR181C	0.0723285										YDR181C	-0.405772	0.327158	-0.364719	0.411435
YDR182W-A	0.514832		YDR182W-A	0.433969										YDR182W-A	-1.61575	0.393928	0.03765	0.041006
YDR182W	0.524878		YDR182W	0.675082										YDR182W	0.279173	-0.443824	-0.010915	0.125233
YDR183W	0.374066		YDR183W	0.884515										YDR183W	-0.632944	-0.449931	-0.126866	0.31046
YDR184C	0.9716		YDR184C	0.66856										YDR184C	-1.07859	-0.622777	0.98641	2.29689
YDR185C	0.231525		YDR185C	0.058943										YDR185C	-1.27136	-0.270221	-0.57038	-0.224303
YDR186C	0.0520474		YDR186C	0.576872										YDR186C	0.218293	0.484224	0.185229	-0.058756
YDR188W	0.357686		YDR188W	0.555366										YDR188W	0.840796	-0.014791	0.191151	0.169644
YDR189W	0.354656		YDR189W	0.373011										YDR189W	0.06555	0.148623	0.015231	0.030046
YDR190C	0.459391		YDR190C	0.613834										YDR190C	0.627335	-0.079475	0.040071	0.43972
YDR191W	0.535158		YDR191W	0.674226										YDR191W	-0.552886	0.157517	0.030565	-0.561122
YDR192C	0.584589		YDR192C	0.804653										YDR192C	-0.880562	-0.417836	0.117696	0.216759
YDR194C	0.333198		YDR194C	0.388513										YDR194C	0.367894	-1.06826	0.098661	-0.189012
YDR194W-A	0.72199		YDR194W-A	0.286614										YDR194W-A	-2.24845	0.927416	0.81744	0.323046
YDR195W	0.616671		YDR195W	0.81626										YDR195W	-0.401666	-0.268654	0.074447	0.145645
YDR196C	0.915245		YDR196C	0.944044										YDR196C	0.195444	0.167251	-0.149277	-0.199577
YDR197W	0.175891		YDR197W	0.241538										YDR197W	-0.205212	-0.493852	-0.367638	-0.212294
YDR198C	0.698232		YDR198C	0.85933										YDR198C	-0.480013	-0.219844	0.154493	0.139193
YDR200C	0.472257		YDR200C	0.941036										YDR200C	-0.020913	0.145819	-0.479596	-0.175682
YDR201W	0.0187492		YDR201W	0.759132										YDR201W	-0.257333	-0.069082	-0.242605	0.160238
YDR202C	0.523367		YDR202C	0.117118										YDR202C	-0.511344	-0.52061	0.018777	-0.758643
YDR204W	0.864857		YDR204W	0.365918										YDR204W	0.274937	-0.205502	-0.177437	-0.961252
YDR205W	0.665521		YDR205W	0.93026										YDR205W	0.269918	0.482988	-0.071804	-0.602364
YDR206W	0.143317		YDR206W	0.165877										YDR206W	0.420185	0.298638	0.263597	0.515778
YDR207C	0.25553		YDR207C	0.580446										YDR207C	-0.489832	0.265048	-0.197928	-0.033672
YDR208W	0.662871		YDR208W	0.932854										YDR208W	0.264588	-0.060131	-0.069208	0.07437
YDR210W	0.248074		YDR210W	0.912821										YDR210W	-0.36314	0.273815	-0.151706	-0.20749
YDR211W	0.667476		YDR211W	0.836721										YDR211W	0.342737	-0.363479	-0.092303	0.621897
YDR212W	0.390587		YDR212W	0.225046										YDR212W	0.508596	0.14862	0.088281	0.322443
YDR213W	0.745647		YDR213W	0.890754										YDR213W	-0.808516	0.378477	0.328439	-0.537165
YDR214W	0.790427		YDR214W	0.933387										YDR214W	0.146984	0.142613	-0.072129	-0.176082
YDR216W	0.929211		YDR216W	0.368361										YDR216W	0.954363	-0.06919	-0.762649	-0.329828
YDR217C	0.490355		YDR217C	0.370877										YDR217C	0.400635	0.85519	0.00607	0.175873
YDR218C	0.489998		YDR218C	0.852333										YDR218C	-2.3713	-0.088062	-0.03726	0.142529
YDR219C	0.983385		YDR219C	0.261026										YDR219C	0.384436	0.553021	-0.364875	0.217926
YDR221W	0.458809		YDR221W	0.391536										YDR221W	-0.010618	0.300134	-0.163875	0.051636
YDR222W	0.929378		YDR222W	0.508497										YDR222W	-1.22848	-0.022609	1.53647	1.69374
YDR223W	0.325132		YDR223W	0.398403										YDR223W	-1.29248	-0.105329	-0.364228	-0.654393
YDR224C	0.267836		YDR224C	0.532831										YDR224C	-0.305427	-0.27501	-0.116599	0.014195
YDR225W	0.993109		YDR225W	0.154291										YDR225W	0.164567	-0.048589	-0.168169	-0.080503
YDR226W	0.094367		YDR226W	0.960818										YDR226W	0.213361	-0.218003	0.157919	0.192694
YDR227W	0.45639		YDR227W	0.314553										YDR227W	-0.273242	0.516878	-0.018747	0.154975
YDR228C	0.0407462		YDR228C	0.158701										YDR228C	-0.07911	-0.103123	-0.089945	-0.173562
YDR229W	0.233192		YDR229W	0.602958										YDR229W	-0.162857	0.091952	-0.365564	-0.563599
YDR231C	0.637892		YDR231C	0.108237										YDR231C	0.418428	-0.519357	-0.092076	-0.367163
YDR232W	0.246555		YDR232W	0.705534										YDR232W	0.214264	-0.188094	0.509463	0.562218
YDR233C	0.215885		YDR233C	0.1387										YDR233C	0.652237	-0.217118	0.312085	-0.340584
YDR234W	0.172102		YDR234W	0.227864										YDR234W	1.13925	0.514549	0.644841	1.12948
YDR235W	0.0998772		YDR235W	0.56977										YDR235W	-0.371424	0.025565	-0.511014	-0.232336
YDR236C	0.249836		YDR236C	0.896239										YDR236C	0.596941	0.097025	0.247441	-0.135216
YDR237W	0.668961		YDR237W	0.353662										YDR237W	-0.156602	-0.382071	0.042567	-0.089406
YDR238C	0.790191		YDR238C	0.064378										YDR238C	0.295437	-0.118662	-0.144843	-0.096799
YDR239C	0.305867		YDR239C	0.173249										YDR239C	0.044838	0.185326	0.142451	0.328799
YDR240C	0.557902		YDR240C	0.682922										YDR240C	-0.249681	-0.094793	0.022772	0.320777
YDR242W	0.224014		YDR242W	0.381135										YDR242W	-0.923932	0.352929	-0.427674	0.066673
YDR243C	0.459017		YDR243C	0.711075										YDR243C	-0.760902	-0.14514	-0.049052	0.421594
YDR244W	0.977177		YDR244W	0.836198										YDR244W	0.559868	0.73785	-0.521098	-0.430436
YDR245W	0.573148		YDR245W	0.511263										YDR245W	1.03483	-0.00826	-0.119428	0.466816
YDR246W-A	0.517883		YDR246W-A	0.0625555										YDR246W-A	-1.65887	-0.469629	0.046612	-0.385346
YDR246W	0.217973		YDR246W	0.327182										YDR246W	-0.060254	-0.044878	-0.126995	-0.161239
YDR247W	0.500486		YDR247W	0.818652										YDR247W	-8.1e-05	-0.519986	0.106199	0.284433
YDR248C	0.204262		YDR248C	0.306632										YDR248C	-0.334382	-0.175308	-0.167566	-0.559303
YDR249C	0.353438		YDR249C	0.554702										YDR249C	-0.953863	-0.407431	-0.223561	0.035095
YDR251W	0.517734		YDR251W	0.985304										YDR251W	0.01497	0.598341	-0.537249	-0.571335
YDR252W	0.267825		YDR252W	0.477684										YDR252W	-0.723522	1.45096	-0.276225	0.050883
YDR253C	0.0179306		YDR253C	0.617298										YDR253C	-0.961561	-0.106379	-0.908866	0.570811
YDR254W	0.338545		YDR254W	0.760935										YDR254W	-1.95331	1.51833	-0.506285	-0.659689
YDR255C	0.0742509		YDR255C	0.0777783										YDR255C	-1.43958	-0.734273	-1.13762	-0.573676
YDR256C	0.281406		YDR256C	0.893574										YDR256C	-0.133824	-0.447167	-0.047846	0.628722
YDR257C	0.662778		YDR257C	0.0804261										YDR257C	0.177677	0.2717	-0.046447	0.350758
YDR258C	0.35357		YDR258C	0.0491899										YDR258C	-0.315482	-0.54522	-1.34732	-0.466863
YDR259C	0.854043		YDR259C	0.00366197										YDR259C	-0.541394	0.149317	0.336515	0.147609
YDR260C	0.439415		YDR260C	0.638402										YDR260C	-0.804371	0.848408	-0.076781	-0.187407
YDR261C-D	0.00654531		YDR261C-D	0.174536										YDR261C-D	-0.57371	-0.835284	-0.58563	-1.48896
YDR261C	0.973328		YDR261C	0.806537										YDR261C	-0.076539	-0.298328	0.083237	0.570931
YDR261W-B	0.51001		YDR261W-B	0.098661										YDR261W-B	-0.984454	-0.64813	0.015481	-0.88814
YDR262W	0.538054		YDR262W	0.189595										YDR262W	0.04275	-0.0681	-0.714336	-0.128421
YDR263C	0.00407534		YDR263C	0.309507										YDR263C	-0.519645	-0.362238	-0.526341	-1.17424
YDR264C	0.856192		YDR264C	0.821022										YDR264C	1.43246	0.550107	-0.897093	-0.996848
YDR265W	0.874406		YDR265W	0.973876										YDR265W	0.273305	0.69254	-0.409857	-0.637913
YDR266C	0.557875		YDR266C	0.110129										YDR266C	-0.023772	0.182536	0.260768	0.259834
YDR267C	0.492059		YDR267C	0.0380241										YDR267C	0.404038	0.325449	0.00504	0.288722
YDR268W	0.311536		YDR268W	0.481045										YDR268W	-0.628548	-0.011707	-0.191708	-0.393066
YDR270W	0.753532		YDR270W	0.824716										YDR270W	0.880811	0.917481	-0.370583	-1.63999
YDR272W	0.822788		YDR272W	0.416513										YDR272W	0.076004	-1.1304	-0.136828	-0.149098
YDR273W	0.710447		YDR273W	0.602469										YDR273W	0.463273	0.277343	-0.158977	-0.04503
YDR275W	0.610133		YDR275W	0.166865										YDR275W	0.054341	0.249305	-0.310977	0.143833
YDR276C	0.0730939		YDR276C	0.184868										YDR276C	-0.071347	-0.862025	-0.089948	-0.465354
YDR277C	0.66897		YDR277C	0.128639										YDR277C	0.336977	-0.112472	-1.23965	-0.074225
YDR279W	0.745344		YDR279W	0.353374										YDR279W	0.383346	0.15069	-0.155512	0.642656
YDR280W	0.169023		YDR280W	0.789146										YDR280W	0.068545	-0.21055	0.119745	0.43125
YDR281C	0.433714		YDR281C	0.431963										YDR281C	-0.848864	0.119746	-0.088706	1.1162
YDR282C	0.448989		YDR282C	0.0191671										YDR282C	-0.670335	-0.26029	-0.053828	-0.276455
YDR283C	0.614175		YDR283C	0.217903										YDR283C	0.289779	-0.362269	-0.052535	-0.171931
YDR284C	0.219624		YDR284C	0.243094										YDR284C	-0.352756	-0.61765	-0.166249	-1.44655
YDR285W	0.448424		YDR285W	0.488161										YDR285W	-1.71793	-0.035903	-0.139485	-1.93041
YDR286C	0.615108		YDR286C	0.119443										YDR286C	-0.721484	-0.264715	0.131893	-0.388784
YDR287W	0.728482		YDR287W	0.0588498										YDR287W	0.781838	-0.195055	-0.293304	-0.161958
YDR288W	0.549005		YDR288W	0.58668										YDR288W	0.013034	-0.454813	-0.16899	0.062311
YDR289C	0.440834		YDR289C	0.0415716										YDR289C	-0.018977	0.174849	-0.203603	0.199317
YDR291W	0.243105		YDR291W	0.962342										YDR291W	-0.344468	0.136847	-0.147074	-0.154076
YDR292C	0.510121		YDR292C	0.294674										YDR292C	1.02641	0.145582	-0.016319	0.43562
YDR293C	0.996531		YDR293C	0.19913										YDR293C	0.139355	-0.531763	-0.140882	-1.04013
YDR294C	0.511361		YDR294C	0.240184										YDR294C	1.40443	-0.06616	-0.025066	-0.153008
YDR295C	0.406691		YDR295C	0.222849										YDR295C	-0.343263	0.083787	-0.050675	0.180145
YDR296W	0.21133		YDR296W	0.461153										YDR296W	-0.042517	-0.748754	-0.087249	-0.045746
YDR297W	0.196123		YDR297W	0.595921										YDR297W	0.567546	-0.198554	0.293546	1.3078
YDR298C	0.227605		YDR298C	0.00920557										YDR298C	0.501198	0.198668	0.228573	0.193004
YDR299W	0.0274782		YDR299W	0.453903										YDR299W	0.683378	0.10453	0.745072	1.44108
YDR300C	0.309296		YDR300C	0.254397										YDR300C	0.575412	0.357436	0.177717	0.880072
YDR301W	0.654614		YDR301W	0.975157										YDR301W	0.769018	0.342719	-0.19053	-0.370568
YDR302W	0.701933		YDR302W	0.90333										YDR302W	-0.018904	-0.543865	0.057585	0.74039
YDR303C	0.376427		YDR303C	0.65158										YDR303C	-0.050665	0.33883	-0.257727	-0.082236
YDR304C	0.761444		YDR304C	0.120483										YDR304C	-0.138028	-0.65541	0.060102	-0.44469
YDR305C	0.100932		YDR305C	0.0119091										YDR305C	-0.236855	-0.507207	-0.327009	-0.488577
YDR306C	0.917295		YDR306C	0.298292										YDR306C	0.364046	-0.152922	-0.473465	-0.466385
YDR307W	0.278497		YDR307W	0.118957										YDR307W	-0.717944	-0.228897	-0.260392	-0.156107
YDR308C	0.692497		YDR308C	0.878987										YDR308C	-0.467251	-0.395669	0.145754	0.267977
YDR309C	0.178055		YDR309C	0.265539										YDR309C	-1.05886	1.2174	-0.586331	0.469791
YDR310C	0.974834		YDR310C	0.401737										YDR310C	-0.284967	1.71957	0.308437	0.267545
YDR311W	0.334571		YDR311W	0.286737										YDR311W	-0.396405	0.108184	-0.105391	0.310773
YDR312W	0.170026		YDR312W	0.343319										YDR312W	0.678017	0.196051	0.386697	0.780435
YDR313C	0.385553		YDR313C	0.761208										YDR313C	-0.145825	0.315756	-0.802404	-0.137352
YDR314C	0.392063		YDR314C	0.150668										YDR314C	-2.28162	-0.054705	-0.390594	-0.089481
YDR315C	0.384578		YDR315C	0.209411										YDR315C	-1.18915	-0.799682	-0.217992	-1.62854
YDR316W-B	0.467997		YDR316W-B	0.28911										YDR316W-B	-0.893204	-0.244723	-0.04494	-0.711529
YDR316W	0.752885		YDR316W	0.308601										YDR316W	-0.182832	-0.056446	0.076704	-0.182056
YDR317W	0.0451313		YDR317W	0.120878										YDR317W	-0.834466	0.405848	-0.723811	0.598963
YDR318W	0.0729989		YDR318W	0.141474										YDR318W	-0.682107	0.08248	-0.541215	0.052076
YDR319C	0.015939		YDR319C	0.316957										YDR319C	-0.65882	-0.197515	-0.692664	-0.667918
YDR320C-A	0.501433		YDR320C-A	0.6814										YDR320C-A	-0.571222	-0.389669	0.001286	0.114139
YDR320C	0.149107		YDR320C	0.72351										YDR320C	0.240139	0.488589	0.147621	-0.178952
YDR321W	0.13428		YDR321W	0.700965										YDR321W	0.54722	-0.276678	0.354213	0.847154
YDR322C-A	0.922111		YDR322C-A	0.208631										YDR322C-A	-0.345216	0.055474	0.269615	0.112623
YDR322W	0.110819		YDR322W	0.806277										YDR322W	0.188002	-0.455468	0.131769	0.237758
YDR323C	0.323417		YDR323C	0.411475										YDR323C	-0.77702	-0.160506	-0.22123	-0.022464
YDR324C	0.246836		YDR324C	0.459287										YDR324C	0.238073	0.073165	0.566775	1.14251
YDR325W	0.863001		YDR325W	0.195556										YDR325W	0.525906	0.922436	-0.337238	0.478145
YDR326C	0.0100591		YDR326C	0.644954										YDR326C	-0.029273	0.041119	-0.030213	-0.177458
YDR328C	0.915919		YDR328C	0.29183										YDR328C	0.358488	-0.642004	-0.274409	-0.217747
YDR329C	0.531641		YDR329C	0.776454										YDR329C	0.017991	0.24966	-0.361688	-0.538317
YDR330W	0.219732		YDR330W	0.436927										YDR330W	-0.185419	-0.124226	-0.393606	-1.24975
YDR331W	0.436181		YDR331W	0.643888										YDR331W	-1.07643	-1.02961	-0.108271	0.236755
YDR332W	0.440328		YDR332W	0.611764										YDR332W	-0.825819	0.250263	-0.077634	-0.044393
YDR333C	0.561767		YDR333C	0.0193984										YDR333C	0.355874	0.168757	-0.034637	0.179368
YDR334W	0.539675		YDR334W	0.811826										YDR334W	0.37919	0.081298	-0.023662	-0.152486
YDR335W	0.764837		YDR335W	0.810675										YDR335W	0.605268	0.119585	-0.267401	-0.225279
YDR336W	0.523792		YDR336W	0.696238										YDR336W	-0.722282	0.133055	0.027006	-0.417888
YDR337W	0.0403048		YDR337W	0.0232248										YDR337W	-0.113753	-0.221612	-0.10019	-0.206005
YDR338C	0.766938		YDR338C	0.660717										YDR338C	0.308023	0.592735	-0.137298	-0.1529
YDR339C	0.299751		YDR339C	0.711611										YDR339C	-0.13778	-0.289956	-0.044827	0.839951
YDR341C	0.812828		YDR341C	0.74575										YDR341C	0.210864	-0.312354	-0.112849	0.126945
YDR342C	0.348395		YDR342C	0.753416										YDR342C	-0.274392	0.122803	-1.13037	-0.292031
YDR345C	0.822942		YDR345C	0.216024										YDR345C	-1.36685	0.364128	0.759678	0.761432
YDR346C	0.484978		YDR346C	0.125012										YDR346C	1.40469	0.712747	0.033151	0.476223
YDR347W	0.480694		YDR347W	0.577212										YDR347W	0.58816	0.517477	0.017842	-0.063071
YDR348C	0.788102		YDR348C	0.125367										YDR348C	0.608898	0.481344	-0.296048	0.321223
YDR349C	0.231205		YDR349C	0.282973										YDR349C	0.154563	0.132057	0.069436	0.046848
YDR350C	0.187349		YDR350C	0.272219										YDR350C	-0.395341	-0.444964	-0.211435	-0.166368
YDR351W	0.632974		YDR351W	0.122899										YDR351W	0.535471	0.199036	-0.113502	0.133944
YDR352W	0.932455		YDR352W	0.966306										YDR352W	-0.245214	-0.336433	0.30367	0.374073
YDR353W	0.567155		YDR353W	0.274158										YDR353W	0.531593	0.314073	-0.056285	0.11634
YDR354W	0.735567		YDR354W	0.768856										YDR354W	0.483074	0.406154	-0.187382	-0.903857
YDR356W	0.91531		YDR356W	0.548657										YDR356W	0.333627	-0.043316	-0.254873	0.56564
YDR357C	0.206114		YDR357C	0.0692076										YDR357C	-1.00236	-0.3829	-0.49866	-0.307544
YDR358W	0.167985		YDR358W	0.211691										YDR358W	-0.678173	-0.862216	-1.18027	-1.7719
YDR359C	0.311899		YDR359C	0.87902										YDR359C	0.044805	0.237124	0.147202	-0.350075
YDR361C	0.915605		YDR361C	0.756524										YDR361C	-0.206587	-0.471515	0.157973	1.10614
YDR362C	0.935652		YDR362C	0.581521										YDR362C	0.0977	-0.230906	-0.119755	0.029731
YDR363W-A	0.055684		YDR363W-A	0.650032										YDR363W-A	-0.370215	0.129917	-0.31052	-0.541022
YDR363W	0.358005		YDR363W	0.83591										YDR363W	-0.516908	-0.216041	-0.117245	0.1259
YDR364C	0.11804		YDR364C	0.259479										YDR364C	0.135236	0.260943	0.197682	0.657495
YDR365C	0.505877		YDR365C	0.512643										YDR365C	-0.296059	-0.020636	0.002733	1.03897
YDR366C	0.572691		YDR366C	0.623145										YDR366C	-1.77425	-0.070894	0.203474	0.361915
YDR367W	0.3269		YDR367W	0.44798										YDR367W	-0.418916	-0.575884	-0.116798	-0.047162
YDR368W	0.518432		YDR368W	0.393422										YDR368W	0.44091	-0.249719	-0.012769	-1.47768
YDR369C	0.528507		YDR369C	0.94757										YDR369C	-0.808291	0.187891	0.036218	-0.2217
YDR370C	0.211652		YDR370C	0.734281										YDR370C	-0.267888	-0.191219	-0.130376	0.495935
YDR371W	0.400346		YDR371W	0.641212										YDR371W	0.367497	-0.087139	0.058001	0.386381
YDR372C	0.744332		YDR372C	0.921284										YDR372C	0.197649	0.400846	-0.489448	-0.514621
YDR373W	0.754456		YDR373W	0.346266										YDR373W	0.110016	-0.33452	-0.260431	-0.082389
YDR374C	0.434217		YDR374C	0.350035										YDR374C	-2.85841	-0.181968	-0.296418	-0.043676
YDR375C	0.554895		YDR375C	0.101022										YDR375C	0.013477	-0.276428	-0.155906	-0.381758
YDR376W	0.558391		YDR376W	0.986947										YDR376W	0.845164	0.557589	-0.077737	-0.580936
YDR377W	0.159947		YDR377W	0.497177										YDR377W	0.091104	-0.64114	0.154019	-0.002843
YDR378C	0.733848		YDR378C	0.655455										YDR378C	0.3481	-0.103106	-0.133946	0.413813
YDR379C-A	0.420048		YDR379C-A	0.430222										YDR379C-A	-0.697747	-0.123323	-0.088092	-1.12063
YDR379W	0.568949		YDR379W	0.547799										YDR379W	0.01085	0.02201	-0.099788	-0.292591
YDR380W	0.194028		YDR380W	0.577498										YDR380W	-0.426543	-0.064025	-0.222399	0.523344
YDR381C-A	0.00393066		YDR381C-A	0.790766										YDR381C-A	-0.272796	0.302623	-0.269448	-0.615854
YDR381W	0.714422		YDR381W	0.241465										YDR381W	0.690456	0.241158	-0.241767	0.1037
YDR382W	0.885181		YDR382W	0.745831										YDR382W	0.138242	-0.717946	-0.095603	0.291889
YDR383C	0.56554		YDR383C	0.266888										YDR383C	0.141286	0.484352	-0.014597	0.185732
YDR384C	0.26943		YDR384C	0.612198										YDR384C	0.226099	-0.327894	0.596737	0.058394
YDR385W	0.501815		YDR385W	0.568236										YDR385W	0.667783	0.485813	-0.001904	-0.052272
YDR386W	0.383087		YDR386W	0.193174										YDR386W	-0.607778	0.275581	-0.112888	0.144158
YDR387C	0.460288		YDR387C	0.48304										YDR387C	-0.187109	-0.015655	-0.011687	-0.587505
YDR388W	0.33771		YDR388W	0.75217										YDR388W	1.58683	0.279924	0.413519	-0.669335
YDR389W	0.749322		YDR389W	0.190117										YDR389W	0.643451	-0.61926	-0.265724	-0.327736
YDR390C	0.681402		YDR390C	0.205419										YDR390C	0.191058	0.903726	-0.055964	0.450824
YDR391C	0.017406		YDR391C	0.0932124										YDR391C	-0.381047	-0.591262	-0.36076	-0.795819
YDR392W	0.0786046		YDR392W	0.472665										YDR392W	-0.180687	-0.010968	-0.231889	-0.255279
YDR393W	0.322775		YDR393W	0.812882										YDR393W	-0.391434	-0.340952	-0.111874	0.182506
YDR394W	0.671919		YDR394W	0.00395743										YDR394W	0.57223	-0.425321	-0.1584	-0.430642
YDR395W	0.13589		YDR395W	0.248467										YDR395W	0.327896	0.384949	0.211071	0.923054
YDR397C	0.453875		YDR397C	0.0588897										YDR397C	0.034169	0.589447	0.470772	0.489367
YDR398W	0.194516		YDR398W	0.155599										YDR398W	0.622009	0.949261	1.1952	1.58008
YDR399W	0.838285		YDR399W	0.497819										YDR399W	-0.189815	0.003539	0.322942	1.03293
YDR400W	0.130394		YDR400W	0.241883										YDR400W	0.54984	0.216244	0.838181	0.503793
YDR402C	0.528217		YDR402C	0.0229719										YDR402C	-2.45458	-0.28005	0.108865	-0.260535
YDR403W	0.170022		YDR403W	0.356506										YDR403W	-1.81983	-0.908462	-1.03793	-0.208307
YDR404C	0.849771		YDR404C	0.677684										YDR404C	0.165592	-0.436896	-0.101393	0.125208
YDR405W	0.762102		YDR405W	0.552577										YDR405W	0.199345	0.97222	-0.456518	-0.080476
YDR406W	0.645748		YDR406W	0.92829										YDR406W	0.111078	0.513938	-0.025884	-0.645042
YDR407C	0.88208		YDR407C	0.309354										YDR407C	0.201751	-0.302457	-0.294791	-0.093384
YDR408C	0.53372		YDR408C	0.65366										YDR408C	0.84344	-0.156422	-0.044717	0.635428
YDR409W	0.216222		YDR409W	0.617657										YDR409W	0.266364	-0.043405	0.557441	0.232176
YDR410C	0.675585		YDR410C	0.895702										YDR410C	-0.220376	-0.304446	0.062371	0.425039
YDR411C	0.101942		YDR411C	0.926193										YDR411C	0.483699	0.602243	0.349179	-0.476603
YDR412W	0.193945		YDR412W	0.226319										YDR412W	1.09668	0.418157	0.571992	0.912016
YDR414C	0.470416		YDR414C	0.544837										YDR414C	-1.06294	-0.038105	-0.04943	0.540135
YDR415C	0.474699		YDR415C	0.639668										YDR415C	0.107383	0.232251	0.00427	-0.051787
YDR416W	0.536061		YDR416W	0.226302										YDR416W	0.483411	0.638826	-0.027412	0.29292
YDR418W	0.00185216		YDR418W	0.833684										YDR418W	-0.07317	-0.623259	-0.073597	0.360296
YDR419W	0.468352		YDR419W	0.331334										YDR419W	-0.678072	-0.183906	-0.033737	-0.049897
YDR420W	0.0464496		YDR420W	0.964662										YDR420W	0.322022	0.2304	0.372809	-0.206143
YDR421W	0.915661		YDR421W	0.181275										YDR421W	-0.193125	-0.178772	0.147706	-0.326733
YDR422C	0.534668		YDR422C	0.285476										YDR422C	0.631959	-0.115424	-0.034448	-0.329467
YDR423C	0.491221		YDR423C	0.523629										YDR423C	-0.006621	0.029423	-0.48011	-0.792346
YDR424C	0.276249		YDR424C	0.152701										YDR424C	-0.71459	-0.602912	-0.262035	-0.365955
YDR425W	0.164337		YDR425W	0.32154										YDR425W	-0.490032	-0.295799	-0.841632	-1.02742
YDR427W	0.91931		YDR427W	0.132492										YDR427W	0.236898	-0.478612	-0.306092	-0.311714
YDR428C	0.947889		YDR428C	0.0105484										YDR428C	0.222509	0.142106	-0.188768	0.146895
YDR429C	0.0391242		YDR429C	0.816421										YDR429C	0.253318	-0.373538	0.22395	0.688606
YDR430C	0.0475594		YDR430C	0.678785										YDR430C	0.294961	0.198758	0.342686	-0.689036
YDR432W	0.318006		YDR432W	0.604258										YDR432W	0.752969	1.08064	0.221317	-0.178574
YDR434W	0.764646		YDR434W	0.728212										YDR434W	0.118354	-0.443838	-0.268115	0.166289
YDR435C	0.973636		YDR435C	0.661411										YDR435C	0.34139	0.368777	-0.370905	-1.42319
YDR436W	0.831309		YDR436W	0.33128										YDR436W	0.569851	-0.241283	-0.326592	-0.888999
YDR437W	0.576931		YDR437W	0.481577										YDR437W	-1.96974	-0.729198	0.239196	-0.021108
YDR438W	0.336969		YDR438W	0.572964										YDR438W	-0.815023	0.297083	-0.213404	-0.034199
YDR439W	0.624151		YDR439W	0.600243										YDR439W	-0.406967	-0.043307	0.080387	0.272756
YDR440W	0.877782		YDR440W	0.0757778										YDR440W	0.203391	0.708978	-0.301535	0.55751
YDR441C	0.536878		YDR441C	0.530367										YDR441C	0.758912	-0.02905	-0.044011	0.60855
YDR443C	0.540325		YDR443C	0.273635										YDR443C	-0.013954	-0.713404	0.219998	-0.264928
YDR444W	0.105128		YDR444W	0.50524										YDR444W	0.207559	-0.003094	0.290574	0.375899
YDR446W	0.439173		YDR446W	0.397761										YDR446W	-2.07463	0.048802	-0.198829	0.301262
YDR447C	0.248406		YDR447C	0.899671										YDR447C	-0.140204	-0.67651	-0.0584863	0.49098
YDR448W	0.784594		YDR448W	0.756675										YDR448W	-0.399244	0.274161	0.191401	-0.642738
YDR449C	0.661756		YDR449C	0.342152										YDR449C	-0.151774	0.389696	0.584425	1.53935
YDR450W	0.297889		YDR450W	0.43327										YDR450W	0.051668	0.033063	0.157242	0.314275
YDR451C	0.628435		YDR451C	0.65452										YDR451C	0.021575	-0.205794	-0.105487	0.831153
YDR452W	0.107478		YDR452W	0.919183										YDR452W	-0.328943	0.626779	-0.233137	-0.810184
YDR453C	0.869502		YDR453C	0.987157										YDR453C	-0.397387	-0.383371	0.605997	0.368207
YDR454C	0.0030156		YDR454C	0.941895										YDR454C	0.229122	-0.320431	0.231303	0.266694
YDR456W	0.908735		YDR456W	0.716635										YDR456W	0.560361	0.424618	-0.418993	-1.19927
YDR457W	0.589136		YDR457W	0.935213										YDR457W	0.646523	0.39439	-0.091119	-0.321303
YDR458C	0.528004		YDR458C	0.859676										YDR458C	-0.046982	0.161759	0.002068	-0.255178
YDR459C	0.428645		YDR459C	0.697123										YDR459C	-0.353405	-0.238761	-0.039778	0.076387
YDR460W	0.332062		YDR460W	0.466154										YDR460W	-0.038292	0.670875	-0.141775	0.035701
YDR461W	0.639454		YDR461W	0.965395										YDR461W	-0.661109	0.554802	0.14718	-0.618651
YDR462W	0.363131		YDR462W	0.553724										YDR462W	-0.070028	-0.257572	-0.320687	0.021788
YDR463W	0.280403		YDR463W	0.74131										YDR463W	-0.30846	-0.333556	-0.110832	0.132859
YDR464W	0.327382		YDR464W	0.21395										YDR464W	0.535674	0.448859	0.148914	0.216451
YDR465C	0.69048		YDR465C	0.377194										YDR465C	-0.126234	0.226486	0.409232	1.15949
YDR466W	0.225501		YDR466W	0.0654245										YDR466W	-0.212165	-0.268677	-0.097607	-0.330468
YDR468C	0.014667		YDR468C	0.859244										YDR468C	-0.308717	-0.121166	-0.29481	0.191429
YDR469W	0.268309		YDR469W	0.774822										YDR469W	-0.528831	-0.836893	-0.201435	0.38553
YDR470C	0.228251		YDR470C	0.205566										YDR470C	-0.287106	-0.490535	-0.63124	-0.983902
YDR471W	0.0181433		YDR471W	0.931914										YDR471W	0.297254	-0.473844	0.280776	0.381965
YDR472W	0.938456		YDR472W	0.84021										YDR472W	-0.261987	-0.139949	0.318256	0.236463
YDR473C	0.585568		YDR473C	0.97543										YDR473C	0.043683	-0.135068	-0.323039	0.125025
YDR475C	0.48155		YDR475C	0.807838										YDR475C	0.227529	0.315551	0.006596	-0.600898
YDR476C	0.951249		YDR476C	0.676073										YDR476C	0.565218	0.48501	-0.659163	-1.70868
YDR477W	0.679098		YDR477W	0.198719										YDR477W	0.126464	-0.590841	-0.437606	-0.302548
YDR478W	0.514397		YDR478W	0.141038										YDR478W	-0.470574	0.537119	0.010644	0.849423
YDR479C	0.46517		YDR479C	0.925898										YDR479C	-0.048886	0.626505	-0.892641	-0.792415
YDR480W	0.273003		YDR480W	0.449165										YDR480W	-0.503849	0.056709	-0.187677	0.708668
YDR481C	0.642424		YDR481C	0.761433										YDR481C	0.540717	0.146226	-0.123028	-0.335832
YDR482C	0.603194		YDR482C	0.144561										YDR482C	0.084455	0.371996	-0.516446	0.232354
YDR483W	0.625162		YDR483W	0.0513275										YDR483W	0.531798	-0.098865	-0.105922	-0.116246
YDR484W	0.328746		YDR484W	0.0536417										YDR484W	-0.967092	-0.191931	-0.266615	-0.162035
YDR485C	0.459733		YDR485C	0.749284										YDR485C	-0.106797	-0.168505	-0.006764	0.069575
YDR486C	0.31943		YDR486C	0.767924										YDR486C	-0.024206	0.344711	-0.007056	-0.770135
YDR487C	0.573952		YDR487C	0.297192										YDR487C	0.019575	-0.678105	-0.167753	-0.223641
YDR488C	0.376113		YDR488C	0.155771										YDR488C	0.104406	0.729698	0.529723	1.21535
YDR489W	0.422509		YDR489W	0.775529										YDR489W	-1.17384	-0.442932	-0.143592	0.958699
YDR490C	0.393357		YDR490C	0.358033										YDR490C	-0.36118	-0.351872	-0.061075	-1.55165
YDR492W	0.0435862		YDR492W	0.265437										YDR492W	0.233763	-0.255652	0.203761	-0.662169
YDR493W	0.393415		YDR493W	0.352665										YDR493W	-0.419408	-0.681842	-0.070882	-0.16068
YDR494W	0.0709744		YDR494W	0.426164										YDR494W	-0.304799	-0.395582	-0.243425	-0.046087
YDR495C	0.644329		YDR495C	0.4581										YDR495C	0.074961	-0.508804	-0.324961	-0.033536
YDR496C	0.395781		YDR496C	0.281998										YDR496C	0.10087	0.364103	0.610648	1.02138
YDR497C	0.881382		YDR497C	0.670496										YDR497C	0.426462	-0.012216	-0.291179	0.044518
YDR498C	0.221733		YDR498C	0.466594										YDR498C	0.053746	0.007621	0.115028	0.145101
YDR499W	0.666751		YDR499W	0.568258										YDR499W	0.34214	0.619331	-0.091725	-0.06666
YDR500C	0.205922		YDR500C	0.462079										YDR500C	-0.156555	0.018047	-0.077943	0.302618
YDR501W	0.107393		YDR501W	0.66566										YDR501W	-1.03944	-0.388852	-0.736906	1.46045
YDR502C	0.449369		YDR502C	0.829138										YDR502C	0.65139	-0.355118	0.051915	0.624551
YDR503C	0.314075		YDR503C	0.303133										YDR503C	-0.07578	0.409587	-0.252056	0.130858
YDR504C	0.0144278		YDR504C	0.495284										YDR504C	-0.227638	-0.003404	-0.217547	-0.459503
YDR505C	0.830606		YDR505C	0.186883										YDR505C	0.11781	-0.92781	-0.206087	-0.497082
YDR506C	0.650777		YDR506C	0.168823										YDR506C	-0.929197	-0.28587	0.224281	-0.499037
YDR507C	0.957983		YDR507C	0.0113832										YDR507C	0.553901	0.57649	-0.485219	0.556234
YDR508C	0.0344658		YDR508C	0.0704976										YDR508C	1.10553	1.29271	1.23222	1.61615
YDR510W	0.333421		YDR510W	0.792289										YDR510W	0.305611	-0.500006	0.081843	0.247184
YDR511W	0.681615		YDR511W	0.16467										YDR511W	-0.234367	-0.613878	0.068735	-1.05561
YDR512C	0.287039		YDR512C	0.210356										YDR512C	-0.518395	-0.435305	-0.180184	-0.889828
YDR513W	0.212533		YDR513W	0.118544										YDR513W	-0.660078	-1.18608	-0.320118	-0.810028
YDR514C	0.00975007		YDR514C	0.264649										YDR514C	0.550661	0.380764	0.534047	0.982605
YDR515W	0.895428		YDR515W	0.485266										YDR515W	0.09689	-0.744515	-0.069337	-0.017234
YDR516C	0.571531		YDR516C	0.0923828										YDR516C	0.12273	-0.478018	-1.08768	-0.641648
YDR517W	0.467622		YDR517W	0.992568										YDR517W	0.463806	0.588697	0.023609	-0.602606
YDR518W	0.279822		YDR518W	0.634374										YDR518W	0.127499	0.131711	0.353831	-0.614708
YDR519W	0.185472		YDR519W	0.0887953										YDR519W	0.410121	-0.423186	0.220897	-0.561415
YDR520C	0.811061		YDR520C	0.90337										YDR520C	-0.169516	-0.239879	0.090116	0.17623
YDR522C	0.470915		YDR522C	0.110223										YDR522C	-2.20527	-0.189737	-0.100822	-0.13325
YDR523C	0.597774		YDR523C	0.146187										YDR523C	-1.44418	0.212599	0.223563	0.132039
YDR524C-B	0.62921		YDR524C-B	0.425214										YDR524C-B	0.152559	-0.396746	-0.031396	-0.046823
YDR524C	0.383693		YDR524C	0.997376										YDR524C	-0.399843	-0.431789	-0.073873	0.428244
YDR524W-A	0.378696		YDR524W-A	0.200974										YDR524W-A	-5.07869	-0.402401	-0.9796	-0.792753
YDR525W-A	0.858584		YDR525W-A	0.0264005										YDR525W-A	0.434536	-0.545676	-0.274411	-0.502196
YDR527W	0.513833		YDR527W	0.385566										YDR527W	-0.006132	0.122822	0.282164	0.675911
YDR528W	0.754755		YDR528W	0.527144										YDR528W	-0.220221	-0.770756	0.520627	0.032883
YDR529C	0.719125		YDR529C	0.820853										YDR529C	-0.187363	-0.19732	0.522674	0.357788
YDR530C	0.882036		YDR530C	0.902484										YDR530C	0.445764	0.536538	-0.30503	-0.393025
YDR531W	0.99937		YDR531W	0.994586										YDR531W	0.311033	0.192611	-0.311649	-0.195915
YDR532C	0.174675		YDR532C	0.36098										YDR532C	-0.294999	0.038641	-0.526129	0.174128
YDR533C	0.727132		YDR533C	0.335955										YDR533C	0.173757	-0.189393	-0.466176	-0.718648
YDR534C	0.255554		YDR534C	0.520127										YDR534C	-0.857861	0.122929	-2.12327	-3.88699
YDR536W	0.120095		YDR536W	0.67807										YDR536W	-0.20403	-0.122427	-0.300317	0.426214
YDR538W	0.519063		YDR538W	0.540447										YDR538W	-0.48488	-0.021235	0.014524	0.333779
YDR539W	0.891621		YDR539W	0.532381										YDR539W	0.286397	0.026257	-0.405304	-0.51578
YDR540C	0.645483		YDR540C	0.497746										YDR540C	-1.45662	-0.005393	0.338789	-1.52303
YDR541C	0.0679988		YDR541C	0.722219										YDR541C	-0.38102	0.476353	-0.307226	-0.173376
YEL001C	0.345596		YEL001C	0.139682										YEL001C	0.129378	-0.24386	0.032009	-0.154929
YEL002C	0.568844		YEL002C	0.505739										YEL002C	0.400742	0.002238	-0.043506	-0.248258
YEL003W	0.0596725		YEL003W	0.582094										YEL003W	-0.212567	-0.085333	-0.176035	0.658065
YEL004W	0.317497		YEL004W	0.571432										YEL004W	-1.00105	0.523391	-0.295105	-0.058975
YEL005C	0.192605		YEL005C	0.0363988										YEL005C	-0.935055	-0.659617	-0.490198	-0.739711
YEL006W	0.249866		YEL006W	0.0216399										YEL006W	-0.578743	-0.278259	-0.239866	-0.259957
YEL007W	0.00211951		YEL007W	0.667393										YEL007W	0.684088	0.126724	0.679548	-0.470792
YEL009C	0.844312		YEL009C	0.776396										YEL009C	0.138793	0.087413	-0.083356	-0.188525
YEL011W	0.322558		YEL011W	0.329619										YEL011W	-0.473735	-0.404323	-1.65541	-1.47449
YEL012W	0.278035		YEL012W	0.262335										YEL012W	-0.329482	-0.369088	-0.906382	-0.942291
YEL013W	0.996403		YEL013W	0.150257										YEL013W	0.242931	-1.12737	-0.240201	-0.690227
YEL015W	0.79181		YEL015W	0.221647										YEL015W	0.594887	0.432532	-0.293532	0.202169
YEL016C	0.695357		YEL016C	0.223598										YEL016C	0.42309	0.42309	-0.134067	0.196178
YEL017C-A	0.566388		YEL017C-A	0.552675										YEL017C-A	-0.575256	-1.25409	0.060207	0.104003
YEL017W	0.279005		YEL017W	0.137771										YEL017W	0.080392	-0.154534	0.222207	-0.241632
YEL018W	0.267328		YEL018W	0.218251										YEL018W	0.257897	0.189351	0.09869	0.399539
YEL019C	0.543965		YEL019C	0.72774										YEL019C	-2.57411	-0.47503	0.178053	0.177574
YEL020C	0.0686763		YEL020C	0.63872										YEL020C	0.602207	0.492916	0.484518	-0.10914
YEL020W-A	0.665973		YEL020W-A	0.0434173										YEL020W-A	-0.385423	-0.715851	0.102824	-0.820814
YEL021W	0.332627		YEL021W	0.13741										YEL021W	0.603161	0.234542	0.162334	0.150187
YEL022W	0.976196		YEL022W	0.0709821										YEL022W	0.361976	-0.1661	-0.39011	-0.132651
YEL023C	0.441831		YEL023C	0.330405										YEL023C	-1.14084	-0.126182	-0.104531	-0.4624
YEL024W	0.162487		YEL024W	0.811946										YEL024W	1.32826	-0.563092	0.778545	1.05568
YEL025C	0.259223		YEL025C	0.759891										YEL025C	-0.0549	0.085843	-0.021814	-0.198465
YEL026W	0.589678		YEL026W	0.800363										YEL026W	-0.107601	-0.495896	0.758796	0.971882
YEL027W	0.634452		YEL027W	0.495243										YEL027W	0.215328	-0.898022	-0.046165	-0.00671
YEL029C	0.414539		YEL029C	0.557051										YEL029C	-0.734674	-0.003438	-0.099221	0.038261
YEL030W	0.700934		YEL030W	0.566553										YEL030W	-1.11781	0.154626	0.365013	-0.016224
YEL031W	0.43851		YEL031W	0.358082										YEL031W	0.774571	-0.072276	0.075048	-0.318828
YEL032W	0.24847		YEL032W	0.493847										YEL032W	0.587932	-0.004524	0.245186	-0.468071
YEL034W	0.527415		YEL034W	0.850714										YEL034W	-0.008198	-0.355293	0.190253	0.218272
YEL035C	0.549652		YEL035C	0.410308										YEL035C	-1.55128	0.05174	0.121236	0.364811
YEL036C	0.242349		YEL036C	0.492169										YEL036C	0.819657	0.008088	0.351112	0.657492
YEL037C	0.334772		YEL037C	0.551077										YEL037C	1.44504	0.528839	0.3837	-0.042521
YEL038W	0.119248		YEL038W	0.328792										YEL038W	0.64406	-0.113106	0.438816	-0.410386
YEL039C	0.251361		YEL039C	0.768165										YEL039C	-0.75293	-0.811026	-1.82878	1.81012
YEL040W	0.338222		YEL040W	0.968829										YEL040W	0.228515	-0.119323	0.879799	0.13162
YEL041W	0.393478		YEL041W	0.73424										YEL041W	-0.324746	0.25536	-0.054851	-0.662413
YEL042W	0.620373		YEL042W	0.716559										YEL042W	0.405957	-0.273231	-0.077687	0.771996
YEL043W	0.101696		YEL043W	0.969493										YEL043W	0.383785	-0.134142	0.277277	0.147656
YEL044W	0.588131		YEL044W	0.117075										YEL044W	1.08235	-0.389518	-0.150801	-0.267341
YEL046C	0.151326		YEL046C	0.26313										YEL046C	1.15394	0.347412	0.703832	0.135578
YEL047C	0.754158		YEL047C	0.20675										YEL047C	0.579368	0.186393	-0.244428	0.375609
YEL048C	0.321684		YEL048C	0.787032										YEL048C	-1.3527	-0.440538	-0.389118	0.909963
YEL049W	0.439165		YEL049W	0.0224083										YEL049W	-2.17994	-0.613395	-0.208949	-0.571665
YEL050C	0.570586		YEL050C	0.320334										YEL050C	0.191982	-0.118123	-0.021374	-0.407379
YEL051W	0.997265		YEL051W	0.141799										YEL051W	0.281395	-0.392107	-0.283823	-0.247287
YEL052W	0.389916		YEL052W	0.208964										YEL052W	0.416097	-0.038666	0.072677	-0.078603
YEL053C	0.758143		YEL053C	0.666859										YEL053C	-0.120281	-0.072928	0.280193	0.271843
YEL054C	0.432331		YEL054C	0.877434										YEL054C	0.384509	-0.396688	0.041026	0.588799
YEL055C	0.279191		YEL055C	0.177061										YEL055C	0.447339	0.519232	0.161694	0.934237
YEL056W	0.707178		YEL056W	0.638017										YEL056W	0.051977	0.359182	-0.154037	-0.079113
YEL057C	0.0186405		YEL057C	0.581402										YEL057C	-0.670247	0.079194	-0.710693	-0.615975
YEL058W	0.586817		YEL058W	0.749772										YEL058W	0.862967	0.398981	-0.11842	-0.165096
YEL059C-A	0.525996		YEL059C-A	0.368597										YEL059C-A	-0.670194	-0.653792	0.027382	-0.136897
YEL060C	0.706788		YEL060C	0.316368										YEL060C	1.22778	-0.413146	-0.413452	-1.39236
YEL061C	0.824582		YEL061C	0.245371										YEL061C	0.191389	0.2388	-0.342276	0.564861
YEL062W	0.219413		YEL062W	0.279369										YEL062W	-0.440823	-0.162229	-0.207932	-0.44921
YEL063C	0.804026		YEL063C	0.609593										YEL063C	0.250767	-0.81121	-0.129776	0.141044
YEL064C	0.224614		YEL064C	0.800566										YEL064C	-1.08062	-0.244441	-0.498965	0.124823
YEL065W	0.989928		YEL065W	0.512569										YEL065W	0.446723	0.026037	-0.461087	-1.31864
YEL066W	0.411416		YEL066W	0.402434										YEL066W	0.047585	-0.322623	0.339767	-0.049835
YEL069C	0.459845		YEL069C	0.0966504										YEL069C	-2.7477	-0.149895	-0.173541	-0.204047
YEL070W	0.80722		YEL070W	0.0445804										YEL070W	-1.11563	-0.340763	0.584473	-0.296093
YEL071W	0.551781		YEL071W	0.257395										YEL071W	0.059627	-0.240797	-0.731463	-0.09648
YEL072W	0.155682		YEL072W	0.755218										YEL072W	-0.427932	-1.0118	-0.257012	0.428852
YEL073C	0.128178		YEL073C	0.420345										YEL073C	-1.01291	-0.115718	-1.53243	-0.920008
YEL075C	0.476535		YEL075C	0.2758										YEL075C	-2.97609	-0.676788	-0.109746	-0.248714
YEL076C-A	0.546986		YEL076C-A	0.589516										YEL076C-A	-4.08031	-0.661238	0.301694	0.093595
YEL076C	0.530491		YEL076C	0.161422										YEL076C	-3.07733	-0.442403	0.1475	-0.260304
YER001W	0.282721		YER001W	0.721939										YER001W	0.029757	-0.738127	0.083775	0.268284
YER002W	0.995606		YER002W	0.425876										YER002W	-0.330962	0.138748	0.335563	1.18625
YER003C	0.112663		YER003C	0.651486										YER003C	0.383067	-0.156141	0.549925	0.643752
YER004W	0.526506		YER004W	0.854948										YER004W	0.979862	0.121624	-0.040821	-0.195053
YER005W	0.835227		YER005W	0.499565										YER005W	-0.308467	-0.686887	0.179319	-0.000469
YER006W	0.303619		YER006W	0.238635										YER006W	0.532593	0.466746	0.169709	1.07227
YER007C-A	0.417828		YER007C-A	0.670974										YER007C-A	-0.022856	-0.659489	-0.17609	0.181501
YER007W	0.523377		YER007W	0.42013										YER007W	-0.86421	0.640388	0.031748	0.080767
YER008C	0.542346		YER008C	0.702445										YER008C	0.005465	0.070873	-0.082039	-0.215307
YER009W	0.689785		YER009W	0.833316										YER009W	-0.157097	-0.174173	0.511265	0.301696
YER010C	0.850702		YER010C	0.0428138										YER010C	-0.14205	-0.35377	0.087264	-0.309122
YER011W	0.797387		YER011W	0.488849										YER011W	-0.600502	-0.543164	0.302873	-0.009515
YER012W	0.415055		YER012W	0.130656										YER012W	-0.377436	-0.609359	-0.050663	-0.929747
YER013W	0.438287		YER013W	0.849092										YER013W	0.517787	0.199982	0.050351	-0.122157
YER014C-A	0.205731		YER014C-A	0.300219										YER014C-A	-2.83195	-0.452359	-1.41098	-1.39385
YER014W	0.306256		YER014W	0.716663										YER014W	0.361435	0.410026	0.113523	-0.145195
YER015W	0.949324		YER015W	0.768142										YER015W	0.694218	0.281959	-0.591644	-0.62936
YER016W	0.839774		YER016W	0.0895758										YER016W	0.298709	0.468887	-0.505498	0.623633
YER017C	0.441627		YER017C	0.801356										YER017C	1.02536	0.951338	0.094281	-0.487287
YER018C	0.743072		YER018C	0.0484746										YER018C	1.0734	0.624003	-0.430992	0.53554
YER019C-A	0.364786		YER019C-A	0.394168										YER019C-A	-0.658879	-0.335631	-0.142085	-0.056315
YER019W	0.6729		YER019W	0.674866										YER019W	-0.037779	0.063463	0.135666	-0.017884
YER020W	0.255983		YER020W	0.959127										YER020W	-0.295193	1.09553	-0.732042	-1.24607
YER021W	0.911994		YER021W	0.669011										YER021W	0.194662	0.137574	-0.147112	-0.505974
YER023W	0.572445		YER023W	0.51109										YER023W	1.20905	0.333304	-0.138183	-0.005807
YER024W	0.291817		YER024W	0.369601										YER024W	-0.966995	-0.550559	-0.327996	-0.114375
YER025W	0.513733		YER025W	0.721766										YER025W	0.934351	-0.200415	-0.020159	0.551867
YER026C	0.941601		YER026C	0.110268										YER026C	0.531273	-0.261923	-0.441763	-0.373013
YER027C	0.425421		YER027C	0.0512266										YER027C	-0.114005	-0.345718	-0.013417	-0.294121
YER028C	0.852263		YER028C	0.312397										YER028C	-1.85858	0.487103	1.14805	0.147847
YER029C	0.719885		YER029C	0.280956										YER029C	0.111759	0.59936	-0.040213	0.214767
YER030W	0.116364		YER030W	0.378904										YER030W	-0.323925	-0.069234	-0.222854	-0.359574
YER031C	0.393698		YER031C	0.963543										YER031C	0.581709	-0.088587	0.098046	0.099362
YER032W	0.546571		YER032W	0.220411										YER032W	-1.10805	0.229331	0.081203	0.488171
YER033C	0.510757		YER033C	0.161404										YER033C	-0.301087	-0.598537	0.005088	-1.01718
YER034W	0.133138		YER034W	0.0197138										YER034W	0.244954	-0.157361	0.159182	-0.147905
YER035W	0.579074		YER035W	0.300787										YER035W	0.100227	-0.236698	-0.802764	-0.731557
YER036C	0.356897		YER036C	0.353024										YER036C	0.937629	0.151098	0.214389	0.642803
YER037W	0.594509		YER037W	0.794565										YER037W	-2.37199	-0.217519	0.354741	0.436069
YER038C	0.569235		YER038C	0.858977										YER038C	-1.47192	-0.302339	0.160712	0.478107
YER039C-A	0.133937		YER039C-A	0.32961										YER039C-A	-1.7302	-0.234352	-1.12127	-0.854587
YER039C	0.25159		YER039C	0.500162										YER039C	-1.39649	0.000387	-0.574364	-1.52297
YER040W	0.390172		YER040W	0.0695138										YER040W	-0.037366	-0.69081	-0.214439	-0.55431
YER041W	0.915422		YER041W	0.629136										YER041W	-0.286429	0.342775	0.218896	-0.0705
YER042W	0.01479		YER042W	0.660666										YER042W	-0.245743	-0.108201	-0.257435	0.419592
YER043C	0.16656		YER043C	0.73446										YER043C	0.343977	-0.260874	0.198672	0.10067
YER044C-A	0.433667		YER044C-A	0.232814										YER044C-A	-3.10265	-0.69574	-0.324458	-0.310444
YER044C	0.468535		YER044C	0.308071										YER044C	-0.019682	-0.328062	-0.397894	-1.055
YER045C	0.471246		YER045C	0.880655										YER045C	-0.221626	0.407267	-0.010017	-0.597951
YER046W	0.317985		YER046W	0.858855										YER046W	-0.260528	0.724368	-0.886263	-1.14597
YER047C	0.571613		YER047C	0.506807										YER047C	0.489656	0.643406	-0.055315	-0.00688
YER048C	0.794977		YER048C	0.293032										YER048C	0.434712	-0.139948	-0.217194	-0.415196
YER048W-A	0.0482862		YER048W-A	0.320233										YER048W-A	-0.317091	-0.098545	-0.272301	-0.339659
YER049W	0.0645797		YER049W	0.196955										YER049W	0.482089	0.27364	0.591356	0.530757
YER050C	0.294265		YER050C	0.430033										YER050C	-0.355135	-0.353418	-0.118938	-0.038999
YER051W	0.196086		YER051W	0.873421										YER051W	-0.102271	0.665033	-0.197704	-0.441979
YER052C	0.181221		YER052C	0.0906593										YER052C	0.10969	-0.556271	0.060029	-0.41676
YER053C-A	0.215279		YER053C-A	0.209347										YER053C-A	-1.01281	0.287166	-0.485798	0.584661
YER053C	0.151336		YER053C	0.369684										YER053C	-0.757071	-0.175014	-1.24127	-0.843001
YER054C	0.0660415		YER054C	0.297987										YER054C	-0.995192	-0.90857	-0.80751	-0.298392
YER055C	0.399473		YER055C	0.250965										YER055C	0.547574	-0.115778	0.087192	-0.280715
YER056C-A	0.329256		YER056C-A	0.963929										YER056C-A	0.078103	-0.651987	0.284191	0.581995
YER056C	0.954771		YER056C	0.787787										YER056C	-0.362989	-0.687272	0.418612	0.333733
YER057C	0.625701		YER057C	0.0151524										YER057C	-0.285899	-0.357234	0.057196	-0.340621
YER058W	0.0140541		YER058W	0.288764										YER058W	-0.688178	-0.560662	-0.658445	-1.62724
YER059W	0.777274		YER059W	0.638571										YER059W	0.088158	0.075811	-0.189447	-0.342771
YER060W-A	0.304394		YER060W-A	0.795248										YER060W-A	-1.70876	0.35811	-0.542197	-0.179112
YER060W	0.38274		YER060W	0.804309										YER060W	-1.27	-0.253873	-0.236606	0.490026
YER061C	0.972834		YER061C	0.317476										YER061C	-0.144358	0.299147	0.132535	0.088198
YER062C	0.177528		YER062C	0.804384										YER062C	0.591198	-0.55982	1.06556	0.290116
YER063W	0.668161		YER063W	0.15886										YER063W	0.291205	-0.365113	-0.078761	-0.216811
YER064C	0.136375		YER064C	0.543269										YER064C	0.573106	-0.096781	0.368298	1.42174
YER065C	0.376529		YER065C	0.721045										YER065C	-0.493629	-0.841539	-0.096957	0.304534
YER066W	0.262974		YER066W	0.990035										YER066W	-0.572388	-0.032539	-0.223537	0.033574
YER067W	0.188617		YER067W	0.238987										YER067W	-1.00426	-1.32366	-1.88679	-0.575299
YER068W	0.84738		YER068W	0.969236										YER068W	0.167923	0.207109	-0.101955	-0.188001
YER069W	0.955957		YER069W	0.562186										YER069W	0.435541	0.111782	-0.379092	-1.14071
YER070W	0.625433		YER070W	0.457299										YER070W	0.873212	0.048094	-0.17431	0.71594
YER071C	0.321067		YER071C	0.355968										YER071C	-0.14515	-0.147068	-0.502752	-0.638909
YER072W	0.463439		YER072W	0.132181										YER072W	0.261374	-0.333224	0.015027	-0.217257
YER073W	0.351766		YER073W	0.784561										YER073W	-0.131397	0.967053	-0.554076	-2.01745
YER074W-A	0.542453		YER074W-A	0.692314										YER074W-A	-0.286147	-0.16922	0.01911	0.052733
YER074W	0.542931		YER074W	0.68339										YER074W	0.315748	-0.455855	-0.0213253	0.135074
YER075C	0.983002		YER075C	0.737261										YER075C	0.113829	0.208025	-0.120076	-0.532089
YER076C	0.107411		YER076C	0.200395										YER076C	-0.11309	-0.360006	-0.08017	-0.183151
YER077C	0.307111		YER077C	0.193132										YER077C	0.051662	0.5465	0.165258	0.285923
YER078C	0.0363819		YER078C	0.217125										YER078C	-0.337051	-0.667662	-0.300572	-0.317868
YER078W-A	0.46594		YER078W-A	0.314095										YER078W-A	-3.13117	-0.82609	-0.167683	-0.248333
YER079W	0.0628932		YER079W	0.256848										YER079W	-0.969659	-0.312473	-1.18302	-0.777942
YER080W	0.371803		YER080W	0.48228										YER080W	-0.032481	-0.015714	-0.159113	-0.564419
YER081W	0.678236		YER081W	0.872533										YER081W	0.325087	-0.150273	-1.13064	0.226797
YER082C	0.109041		YER082C	0.155953										YER082C	1.08207	0.884256	0.762927	1.47373
YER083C	0.494457		YER083C	0.736527										YER083C	0.001908	-0.338584	0.219135	0.131923
YER085C	0.738443		YER085C	0.192464										YER085C	-0.810219	1.23263	0.318498	0.64655
YER086W	0.42714		YER086W	0.948063										YER086W	0.600383	-0.155282	0.069014	0.182936
YER087C-B	0.606597		YER087C-B	0.813339										YER087C-B	-0.074613	-0.137064	0.441434	0.255618
YER087W	0.262237		YER087W	0.845751										YER087W	0.276975	0.214372	0.108538	-0.355122
YER088C	0.158017		YER088C	0.554647										YER088C	0.332781	1.42107	0.198208	-0.122285
YER089C	0.456918		YER089C	0.635721										YER089C	1.65552	0.280538	0.112206	-0.060731
YER090W	0.712691		YER090W	0.954876										YER090W	0.911853	0.447088	-0.316509	-0.515426
YER091C	0.496417		YER091C	0.988173										YER091C	0.693513	-0.210221	0.003903	0.202552
YER092W	0.99438		YER092W	0.63726										YER092W	0.210645	0.087507	-0.214397	-0.019165
YER093C-A	0.767783		YER093C-A	0.504865										YER093C-A	-0.115552	0.003765	0.05169	-0.492706
YER093C	0.996408		YER093C	0.951009										YER093C	0.128313	0.100959	-0.126873	-0.117829
YER094C	0.857569		YER094C	0.202675										YER094C	0.819633	-0.949028	-0.515775	-0.478541
YER095W	0.830382		YER095W	0.578708										YER095W	0.828933	-0.095237	-0.473475	0.766383
YER096W	0.723571		YER096W	0.894697										YER096W	-1.07512	-0.341845	0.393894	0.24404
YER098W	0.388358		YER098W	0.998593										YER098W	-0.155048	0.093628	-0.87505	-0.093215
YER099C	0.133168		YER099C	0.745587										YER099C	-0.377263	-0.353395	-0.245137	0.870183
YER100W	0.523567		YER100W	0.4048										YER100W	0.713951	-0.360403	-0.026442	-0.0543
YER101C	0.421712		YER101C	0.119729										YER101C	-0.073546	-0.879835	-0.59504	-0.598483
YER102W	0.379052		YER102W	0.975321										YER102W	0.427273	-0.797194	0.082166	0.737664
YER103W	0.491658		YER103W	0.812065										YER103W	-0.03867	0.906347	-2.951	-0.483656
YER104W	0.187411		YER104W	0.982071										YER104W	-0.714559	-0.474462	-0.382068	0.501969
YER105C	0.970114		YER105C	0.0974434										YER105C	0.192629	0.10622	-0.175342	0.077827
YER106W	0.581459		YER106W	0.766433										YER106W	-2.17274	-0.215017	0.279542	0.483414
YER107C	0.811443		YER107C	0.319391										YER107C	0.196824	0.03378	-0.104785	0.115858
YER109C	0.639982		YER109C	0.201087										YER109C	-0.041209	0.1173	0.184383	0.231189
YER110C	0.415781		YER110C	0.257704										YER110C	1.32281	0.314065	0.176025	0.784953
YER111C	0.285135		YER111C	0.105642										YER111C	-0.252852	-0.592496	-0.720507	-0.422502
YER112W	0.335306		YER112W	0.0778929										YER112W	-0.111931	-0.181796	-0.422971	-0.232775
YER113C	0.0093693		YER113C	0.444937										YER113C	0.261568	0.02825	0.25398	0.325804
YER114C	0.350608		YER114C	0.563291										YER114C	0.694011	-0.032954	0.165917	0.330377
YER115C	0.853822		YER115C	0.856492										YER115C	-0.167739	-0.101666	0.270072	0.063736
YER116C	0.262062		YER116C	0.767484										YER116C	-0.526986	0.041155	-0.206677	-0.092117
YER117W	0.200767		YER117W	0.769978										YER117W	-0.120506	-0.598833	-0.061218	0.270358
YER118C	0.457732		YER118C	0.754272										YER118C	-0.113578	-0.460869	-0.007552	1.09185
YER119C	0.248165		YER119C	0.412555										YER119C	0.415039	-0.100115	0.173318	-0.72427
YER120W	0.161828		YER120W	0.261248										YER120W	0.442389	0.102319	0.259916	0.259916
YER122C	0.489083		YER122C	0.12571										YER122C	0.382738	0.23814	0.006564	0.158736
YER123W	0.326075		YER123W	0.37039										YER123W	-0.352417	-0.382421	-0.09875	-0.078951
YER124C	0.54589		YER124C	0.395025										YER124C	1.01309	0.818808	-0.073154	0.136254
YER125W	0.609166		YER125W	0.012203										YER125W	0.544571	-0.436904	-0.094308	-0.453983
YER126C	0.0185592		YER126C	0.765398										YER126C	0.310785	-0.433667	0.293173	0.979279
YER127W	0.10954		YER127W	0.224148										YER127W	0.563459	0.580944	0.800491	1.25574
YER128W	0.97851		YER128W	0.594837										YER128W	-0.928106	-0.07426	0.86747	0.011145
YER129W	0.760433		YER129W	0.00016478										YER129W	0.498342	0.405558	-0.216054	0.405768
YER130C	0.343817		YER130C	0.42611										YER130C	0.206928	-0.565225	0.826474	-0.0659
YER131W	0.490539		YER131W	0.805181										YER131W	0.001967	-0.259618	0.132343	0.499439
YER132C	0.0577135		YER132C	0.332853										YER132C	0.312959	0.411464	0.375548	0.110584
YER133W	0.49817		YER133W	0.77013										YER133W	-0.001194	-0.355266	-0.415285	0.160496
YER134C	0.512807		YER134C	0.221934										YER134C	0.287835	-0.644062	-0.005791	-0.300686
YER136W	0.777181		YER136W	0.191792										YER136W	0.292835	-0.332294	-0.629528	-0.63189
YER137C	0.996901		YER137C	0.0269251										YER137C	-0.540826	0.869828	0.535586	0.946702
YER138W-A	0.890305		YER138W-A	0.724915										YER138W-A	-0.544123	0.270531	0.382806	-0.733608
YER139C	0.147032		YER139C	0.34313										YER139C	-0.75821	-0.438817	-0.469508	-0.110372
YER140W	0.637553		YER140W	0.212184										YER140W	-0.021899	0.32729	0.09977	0.158948
YER141W	0.809531		YER141W	0.586915										YER141W	0.297676	0.130975	-0.563216	-0.95337
YER142C	0.418281		YER142C	0.890567										YER142C	-0.101145	1.16155	-0.783622	-1.64959
YER143W	0.282226		YER143W	0.560926										YER143W	-0.16746	0.060994	-0.470292	-0.635388
YER144C	0.463251		YER144C	0.0547294										YER144C	0.124695	-0.387424	0.007206	-0.460499
YER145C	0.575401		YER145C	0.930475										YER145C	1.47895	1.15619	-0.175989	-0.927701
YER146W	0.326526		YER146W	0.329802										YER146W	0.677608	0.561545	0.189353	0.153809
YER147C	0.249322		YER147C	0.406695										YER147C	0.455287	1.27897	0.189154	0.188803
YER148W	0.3235		YER148W	0.313442										YER148W	0.465313	0.208523	0.132416	0.691089
YER149C	0.45691		YER149C	0.278375										YER149C	-0.487469	0.25204	-0.033045	0.6945
YER150W	0.353489		YER150W	0.556262										YER150W	-0.449235	-0.090873	-1.91743	1.02557
YER151C	0.110434		YER151C	0.871747										YER151C	0.184614	-0.052781	0.129561	0.079873
YER152C	0.212405		YER152C	0.533678										YER152C	0.619772	0.026167	0.300725	-0.494181
YER153C	0.722612		YER153C	0.290837										YER153C	-0.371918	-0.053995	0.135625	-0.158386
YER154W	0.058327		YER154W	0.132344										YER154W	0.87798	-0.120268	0.730223	-0.078369
YER155C	0.812571		YER155C	0.298309										YER155C	0.369612	-0.498102	-0.197615	-0.163307
YER156C	0.0751649		YER156C	0.600082										YER156C	1.10387	-0.37847	1.401	2.38758
YER157W	0.645144		YER157W	0.38017										YER157W	0.048058	0.090816	-0.207124	0.476767
YER158C	0.0206888		YER158C	0.536747										YER158C	0.273791	0.024875	0.25655	-0.43047
YER159C	0.426604		YER159C	0.568613										YER159C	-0.649456	-0.833878	-0.075209	0.090222
YER161C	0.743396		YER161C	0.600347										YER161C	0.429702	-0.616568	-0.172788	0.097999
YER162C	0.992349		YER162C	0.70592										YER162C	0.416095	0.159848	-0.406212	-0.476828
YER163C	0.0237917		YER163C	0.0225344										YER163C	0.15952	-0.12817	0.171912	-0.119403
YER164W	0.375412		YER164W	0.565285										YER164W	0.774226	0.248282	0.153482	-0.025551
YER165W	0.530979		YER165W	0.0391053										YER165W	0.870524	0.120677	-0.042395	0.136494
YER166W	0.544612		YER166W	0.80888										YER166W	0.561735	0.55827	-0.039429	-0.294332
YER167W	0.528846		YER167W	0.374063										YER167W	-1.5185	0.845612	0.068852	0.169497
YER168C	0.284282		YER168C	0.153678										YER168C	-0.131204	0.137951	-0.372271	0.083444
YER169W	0.795411		YER169W	0.52455										YER169W	-0.651539	-0.307193	0.326081	0.011852
YER170W	0.767248		YER170W	0.504162										YER170W	0.221008	-0.001769	-0.495174	0.270612
YER171W	0.322895		YER171W	0.181718										YER171W	0.697412	0.371563	0.199182	0.680212
YER172C	0.502551		YER172C	0.258253										YER172C	1.44415	0.459397	-0.005788	0.183348
YER173W	0.264578		YER173W	0.696472										YER173W	-0.500738	-0.202429	-0.194103	0.064535
YER174C	0.0893273		YER174C	0.281734										YER174C	-0.534255	-0.504994	-0.709997	-1.41475
YER175C	0.54334		YER175C	0.510292										YER175C	0.073106	0.046124	-1.0722	-2.85266
YER175W-A	0.18236		YER175W-A	0.155842										YER175W-A	-0.7199	-0.414586	-0.3923	-0.248855
YER176W	0.570143		YER176W	0.836177										YER176W	0.292041	0.362787	-0.032308	-0.621933
YER177W	0.506128		YER177W	0.676473										YER177W	-0.731323	0.171858	0.00704	-0.60401
YER178W	0.495943		YER178W	0.85145										YER178W	0.782473	0.25328	0.004987	-0.41121
YER179W	0.568404		YER179W	0.913191										YER179W	-1.47184	0.975307	0.158758	-0.739954
YER180C-A	0.295242		YER180C-A	0.921434										YER180C-A	-1.12372	0.407722	-0.374425	-0.523194
YER180C	0.309396		YER180C	0.598652										YER180C	-0.626506	-0.049076	-0.193389	0.314158
YER182W	0.0637187		YER182W	0.782728										YER182W	-0.066201	-0.239285	-0.054118	0.113854
YER183C	0.00148363		YER183C	0.816433										YER183C	0.396334	-1.05803	0.394491	0.573959
YER184C	0.453254		YER184C	0.751693										YER184C	-1.43365	0.24457	-0.105461	-0.586032
YER185W	0.452061		YER185W	0.381574										YER185W	-1.67558	-0.188995	-0.126415	-1.00423
YER186C	0.0691002		YER186C	0.967854										YER186C	0.439729	0.307193	0.353311	-0.277637
YER187W	0.890746		YER187W	0.0467669										YER187W	0.102587	0.577573	-0.072279	0.498389
YER188C-A	0.698264		YER188C-A	0.280275										YER188C-A	-2.35631	-0.22949	0.758511	-0.638298
YFL001W	0.150958		YFL001W	0.224389										YFL001W	0.61677	0.319856	0.376682	0.692073
YFL002C	0.398413		YFL002C	0.186255										YFL002C	0.505643	0.33426	0.081379	0.622425
YFL003C	0.429331		YFL003C	0.493903										YFL003C	-2.42793	-0.923476	-0.270628	-0.008845
YFL004W	0.690246		YFL004W	0.952946										YFL004W	0.543395	0.347776	-0.1674	-0.299823
YFL005W	0.750062		YFL005W	0.327706										YFL005W	0.223936	-0.147052	-0.092783	-0.040799
YFL007W	0.0136974		YFL007W	0.668323										YFL007W	0.218144	0.092925	0.227739	-0.343226
YFL008W	0.687815		YFL008W	0.498306										YFL008W	0.622525	0.0014	-0.189177	0.526249
YFL009W	0.726151		YFL009W	0.305896										YFL009W	0.417435	-0.451712	-0.154858	-0.142159
YFL010C	0.522095		YFL010C	0.0102072										YFL010C	0.373602	-0.451888	-0.012972	-0.466616
YFL010W-A	0.302649		YFL010W-A	0.28242										YFL010W-A	-4.58373	-0.288713	-1.46829	-0.811599
YFL011W	0.503402		YFL011W	0.985623										YFL011W	-1.58575	0.221363	0.008473	-0.231594
YFL012W	0.657143		YFL012W	0.690593										YFL012W	-1.77565	-0.219989	0.447425	0.712721
YFL013C	0.0270771		YFL013C	0.56848										YFL013C	-0.093206	0.186803	-0.101492	-0.020172
YFL014W	0.634662		YFL014W	0.912599										YFL014W	-0.200555	-0.258991	0.933948	0.342027
YFL016C	0.969576		YFL016C	0.299619										YFL016C	0.829729	-0.07544	-0.753985	-0.231709
YFL017C	0.416966		YFL017C	0.432781										YFL017C	0.541054	0.021064	0.070972	0.198753
YFL017W-A	0.325314		YFL017W-A	0.868323										YFL017W-A	0.517511	-0.086077	0.145678	0.056218
YFL018C	0.228157		YFL018C	0.644462										YFL018C	0.377451	0.134012	0.171743	-0.580396
YFL020C	0.429292		YFL020C	0.0416233										YFL020C	-1.69905	-0.542572	-0.18949	-0.475888
YFL021W	0.59283		YFL021W	0.491733										YFL021W	-0.077471	0.723327	0.527516	0.009393
YFL022C	0.296591		YFL022C	0.204209										YFL022C	1.17044	0.530786	0.38724	0.266043
YFL023W	0.0303163		YFL023W	0.214148										YFL023W	0.55519	0.538561	0.50468	1.11772
YFL024C	0.46353		YFL024C	0.48929										YFL024C	1.07408	2.01533	0.061598	0.033906
YFL025C	0.52838		YFL025C	0.209321										YFL025C	0.01279	0.280757	-0.286713	0.137913
YFL026W	0.538388		YFL026W	0.458552										YFL026W	-1.5422	0.020254	0.093107	0.310651
YFL027C	0.5		YFL027C	0.413481										YFL027C	-0.193548	-0.522593	0	-0.071463
YFL028C	0.340585		YFL028C	0.100629										YFL028C	0.470276	-0.475649	0.120286	-0.344862
YFL029C	0.428171		YFL029C	0.978181										YFL029C	0.024528	0.283451	0.216467	-0.303578
YFL030W	0.0394204		YFL030W	0.577138										YFL030W	0.399154	0.101048	0.352548	-0.829859
YFL031W	0.504268		YFL031W	0.457638										YFL031W	1.52794	-0.055697	-0.010243	-0.835783
YFL033C	0.677779		YFL033C	0.398928										YFL033C	0.526782	-0.121553	-0.151053	-0.759177
YFL034C-A	0.794822		YFL034C-A	0.880218										YFL034C-A	-0.558346	-0.541017	1.11821	0.795496
YFL034C-B	0.262885		YFL034C-B	0.619058										YFL034C-B	0.285927	-0.157973	0.731841	0.83483
YFL034W	0.0317225		YFL034W	0.388605										YFL034W	-0.227859	-0.115318	-0.251779	-0.652299
YFL036W	0.392668		YFL036W	0.679776										YFL036W	0.584773	0.647997	0.099536	-0.188013
YFL037W	0.472591		YFL037W	0.980889										YFL037W	0.745765	-0.369104	0.032128	0.391957
YFL038C	0.700816		YFL038C	0.477127										YFL038C	0.061185	-0.672015	-0.18749	-0.024155
YFL039C	0.382393		YFL039C	0.698393										YFL039C	0.343558	0.099579	0.0642	-0.309126
YFL040W	0.566904		YFL040W	0.605183										YFL040W	-2.00374	-0.092247	0.211358	0.553236
YFL041W-A	0.104439		YFL041W-A	0.736227										YFL041W-A	-0.87103	0.466986	-0.623608	-1.2002
YFL041W	0.682852		YFL041W	0.801676										YFL041W	1.03037	0.573603	-0.304363	-1.11847
YFL042C	0.771235		YFL042C	0.604906										YFL042C	0.227823	0.177284	-0.501974	-1.06609
YFL044C	0.481991		YFL044C	0.315712										YFL044C	0.003966	-0.708982	0.140161	-0.211167
YFL045C	0.555278		YFL045C	0.0877924										YFL045C	1.08561	0.475404	-0.094502	0.359528
YFL046W	0.824876		YFL046W	0.815947										YFL046W	-0.248071	-0.602086	0.138863	0.326025
YFL047W	0.889558		YFL047W	0.43961										YFL047W	-0.190008	0.033866	0.270753	0.355939
YFL048C	0.325963		YFL048C	0.308203										YFL048C	-0.291912	-0.539957	-0.081851	-0.167782
YFL049W	0.0247989		YFL049W	0.723192										YFL049W	-0.297638	-0.23082	-0.321779	0.08441
YFL050C	0.498866		YFL050C	0.157706										YFL050C	-0.821941	0.275696	-0.001464	0.16439
YFL051C	0.521811		YFL051C	0.9616										YFL051C	-2.95866	0.426959	0.101404	-0.378326
YFL052W	0.0733334		YFL052W	0.00289826										YFL052W	-1.15228	-0.284032	-0.913284	-0.28663
YFL053W	0.723934		YFL053W	0.816223										YFL053W	-1.56771	-0.783626	0.575378	0.424768
YFL054C	0.710037		YFL054C	0.80371										YFL054C	0.288347	0.230102	-0.098742	-0.118937
YFL055W	0.344666		YFL055W	0.154934										YFL055W	0.53456	0.833691	0.133083	0.502041
YFL056C	0.0464648		YFL056C	0.261733										YFL056C	-1.43297	-0.290417	-1.2377	-0.739383
YFL059W	0.284236		YFL059W	0.272415										YFL059W	0.154795	0.200086	0.439106	0.07474
YFL060C	0.396274		YFL060C	0.393166										YFL060C	-1.57541	-0.399769	-0.258981	-0.067724
YFL061W	0.435867		YFL061W	0.537196										YFL061W	-1.66479	-0.850538	-0.16828	0.049751
YFL062W	0.389675		YFL062W	0.826039										YFL062W	-0.410541	0.400991	-0.071867	-0.713289
YFL064C	0.402465		YFL064C	0.166109										YFL064C	-3.98047	-0.527787	-0.614656	-0.912306
YFL065C	0.337601		YFL065C	0.213049										YFL065C	-2.87974	-0.523432	-0.75097	-1.08154
YFL067W	0.4672		YFL067W	0.179009										YFL067W	-4.88678	-0.690134	-0.252004	-0.380805
YFL068W	0.313728		YFL068W	0.174173										YFL068W	-4.67493	-0.551713	-1.40828	-0.982159
YFR001W	0.31257		YFR001W	0.698692										YFR001W	0.133013	-0.272658	0.040333	0.84506
YFR002W	0.396737		YFR002W	0.289583										YFR002W	0.911214	0.389408	0.149113	0.133609
YFR003C	0.0353763		YFR003C	0.672933										YFR003C	-0.210855	0.388132	-0.188633	-1.39351
YFR004W	0.605361		YFR004W	0.138736										YFR004W	0.035172	-0.406119	-0.210575	-0.637141
YFR005C	0.264119		YFR005C	0.0743725										YFR005C	0.119529	1.02943	0.307698	0.813186
YFR006W	0.453839		YFR006W	0.933793										YFR006W	0.581228	-0.211787	0.042219	0.261149
YFR007W	0.637484		YFR007W	0.169376										YFR007W	-0.555991	-0.352237	0.121974	-0.616133
YFR008W	0.0045606		YFR008W	0.065807										YFR008W	-0.809428	-0.910554	-0.821109	-1.12134
YFR009W	0.545856		YFR009W	0.00131742										YFR009W	0.528283	0.210494	-0.038118	0.211367
YFR010W	0.877254		YFR010W	0.138998										YFR010W	0.344063	-0.44102	-0.231662	-0.692524
YFR011C	0.162328		YFR011C	0.824303										YFR011C	0.375293	-0.797361	0.639914	0.445398
YFR012W-A	0.565458		YFR012W-A	0.436459										YFR012W-A	-1.53437	0.053879	0.158325	0.538018
YFR012W	0.482672		YFR012W	0.958627										YFR012W	-2.7474	-0.281455	-0.074798	0.320639
YFR013W	0.542953		YFR013W	0.329979										YFR013W	0.034294	0.626206	-0.50751	0.171333
YFR014C	0.625468		YFR014C	0.299871										YFR014C	0.18239	-0.334161	-0.913429	-1.02773
YFR015C	0.605411		YFR015C	0.346501										YFR015C	0.243237	-0.259585	-1.45555	-1.05566
YFR016C	0.17336		YFR016C	0.447844										YFR016C	-0.029221	-0.039762	-0.051864	-0.484248
YFR017C	0.588715		YFR017C	0.824122										YFR017C	0.183728	0.381361	-1.30988	-0.683177
YFR018C	0.505911		YFR018C	0.860355										YFR018C	0.82856	0.119415	-0.007694	-0.187936
YFR019W	0.755006		YFR019W	0.454837										YFR019W	0.64901	-0.022139	-0.274827	-0.311546
YFR021W	0.142151		YFR021W	0.950568										YFR021W	0.741034	0.438676	0.466769	-0.512696
YFR022W	0.911649		YFR022W	0.553918										YFR022W	-0.333557	0.01312	0.251795	-0.15454
YFR023W	0.575933		YFR023W	0.734364										YFR023W	-1.39038	-0.041172	0.16663	0.10674
YFR024C-A	0.720704		YFR024C-A	0.513031										YFR024C-A	1.19263	0.03239	-0.430863	-1.58213
YFR025C	0.733565		YFR025C	0.103552										YFR025C	0.034907	-0.388305	-0.090837	-0.540775
YFR026C	0.91679		YFR026C	0.71402										YFR026C	-1.18551	0.350705	1.54437	-0.122553
YFR027W	0.595305		YFR027W	0.111295										YFR027W	0.079976	0.776711	-0.53023	0.543524
YFR028C	0.209114		YFR028C	0.434913										YFR028C	0.223269	0.054275	0.454148	0.529016
YFR029W	0.209743		YFR029W	0.70159										YFR029W	0.036607	0.155557	0.074648	-0.474718
YFR030W	0.735849		YFR030W	0.532873										YFR030W	0.070332	-0.027909	-0.181079	0.54001
YFR031C-A	0.505611		YFR031C-A	0.121635										YFR031C-A	0.612681	0.187185	-0.0054	0.276962
YFR031C	0.107236		YFR031C	0.055209										YFR031C	-0.121514	0.303397	-0.086192	0.361175
YFR032C-A	0.456614		YFR032C-A	0.970872										YFR032C-A	-0.671693	-0.30889	-0.045847	0.338533
YFR032C-B	0.592211		YFR032C-B	0.95574										YFR032C-B	-2.40284	-0.948354	0.350493	1.09032
YFR032C	0.695342		YFR032C	0.612031										YFR032C	-1.87691	-0.117037	0.594697	0.658186
YFR033C	0.473669		YFR033C	0.111671										YFR033C	0.025894	0.204867	0.625704	0.143181
YFR034C	0.363533		YFR034C	0.638318										YFR034C	1.21712	-0.097888	0.264975	0.443427
YFR035C	0.245051		YFR035C	0.466824										YFR035C	-2.46339	-0.388168	-1.04288	-0.020247
YFR036W	0.911858		YFR036W	0.649723										YFR036W	-0.709735	-0.229515	0.536131	0.054996
YFR037C	0.690521		YFR037C	0.732696										YFR037C	-0.434801	0.895197	0.134152	-0.342606
YFR038W	0.453666		YFR038W	0.474723										YFR038W	1.054	1.3097	0.076847	0.052029
YFR039C	0.839134		YFR039C	0.876811										YFR039C	0.567694	0.296444	-0.334692	-0.440939
YFR040W	0.44347		YFR040W	0.19389										YFR040W	1.09233	0.722643	0.097251	0.376984
YFR041C	0.268385		YFR041C	0.725969										YFR041C	-0.081309	0.124279	-0.03096	-0.3353
YFR042W	0.742127		YFR042W	0.267842										YFR042W	-0.775588	-0.183362	0.310078	-0.069998
YFR043C	0.773739		YFR043C	0.641467										YFR043C	-0.747474	-0.404573	0.342797	0.091412
YFR044C	0.34655		YFR044C	0.417268										YFR044C	0.636201	-0.089019	0.15639	-0.681141
YFR045W	0.621509		YFR045W	0.909291										YFR045W	-0.519691	0.501719	0.100414	-0.66978
YFR046C	0.257623		YFR046C	0.292581										YFR046C	-0.090575	0.16124	-0.036253	0.477249
YFR047C	0.379503		YFR047C	0.799651										YFR047C	0.116021	0.413574	0.022226	-0.210441
YFR048W	0.357697		YFR048W	0.677607										YFR048W	0.13938	0.277817	0.031685	-0.079582
YFR049W	0.220352		YFR049W	0.824107										YFR049W	-0.130432	0.227273	-0.27758	-0.407164
YFR050C	0.930286		YFR050C	0.226178										YFR050C	0.253079	-0.391036	-0.202941	-0.852368
YFR051C	0.360429		YFR051C	0.936823										YFR051C	0.940011	0.354391	0.209452	-0.290211
YFR052W	0.385657		YFR052W	0.134488										YFR052W	-0.252756	-0.987595	-0.045892	-0.638809
YFR053C	0.663184		YFR053C	0.382991										YFR053C	0.348283	-0.156873	-1.32885	-0.843875
YFR055W	0.355318		YFR055W	0.74171										YFR055W	-0.349834	-0.27435	-0.080903	0.687528
YFR057W	0.458753		YFR057W	0.484162										YFR057W	-2.94733	-0.557679	-0.191227	-0.013877
YGL001C	0.565686		YGL001C	0.357214										YGL001C	0.490286	-1.03919	-0.050768	-0.237066
YGL002W	0.552236		YGL002W	0.540825										YGL002W	0.711939	0.015941	-0.058547	-0.24824
YGL003C	0.871063		YGL003C	0.834039										YGL003C	0.237617	0.190791	-0.156654	-0.329615
YGL004C	0.0632495		YGL004C	0.764414										YGL004C	-0.393277	0.322147	-0.32198	-0.730501
YGL005C	0.265829		YGL005C	0.518561										YGL005C	-0.177602	0.004142	-0.460856	-0.142022
YGL006W-A	0.453152		YGL006W-A	0.080309										YGL006W-A	-1.92741	-0.442315	-0.142093	-0.342751
YGL006W	0.710574		YGL006W	0.387218										YGL006W	0.59886	-0.289196	-0.205639	-1.61531
YGL007C-A	0.926588		YGL007C-A	0.268899										YGL007C-A	-0.865714	0.973213	1.09254	0.369672
YGL008C	0.378046		YGL008C	0.928195										YGL008C	0.580261	0.161447	0.112538	-0.202694
YGL009C	0.0319361		YGL009C	0.0452601										YGL009C	-0.403111	-1.21871	-0.364568	-1.40559
YGL010W	0.106236		YGL010W	0.0186806										YGL010W	-0.898098	-0.646425	-0.639159	-0.68552
YGL011C	0.486483		YGL011C	0.142631										YGL011C	0.712534	-0.426981	0.015131	-0.268502
YGL012W	0.22742		YGL012W	0.858092										YGL012W	0.693236	-0.10461	0.316397	0.165936
YGL013C	0.730152		YGL013C	0.873885										YGL013C	-0.124562	0.061454	0.047102	-0.092322
YGL014W	0.383446		YGL014W	0.108427										YGL014W	0.342777	0.203283	0.063467	0.287729
YGL015C	0.467553		YGL015C	0.585084										YGL015C	-3.1032	-0.029748	-0.158298	0.221254
YGL016W	0.402819		YGL016W	0.23023										YGL016W	0.60476	0.196117	0.093041	0.434769
YGL017W	0.127863		YGL017W	0.852568										YGL017W	0.182521	0.200382	0.275839	-0.123909
YGL018C	0.959162		YGL018C	0.961693										YGL018C	-0.310096	-0.276709	0.272662	0.245263
YGL019W	0.180384		YGL019W	0.876301										YGL019W	0.58223	-0.210173	0.319627	0.313159
YGL020C	0.399822		YGL020C	0.738223										YGL020C	0.230112	-0.54497	0.036512	0.214011
YGL021W	0.582789		YGL021W	0.668112										YGL021W	0.042266	-0.159876	-0.323178	0.043228
YGL022W	0.360016		YGL022W	0.270051										YGL022W	0.835888	0.12258	0.186821	0.046308
YGL023C	0.192767		YGL023C	0.0139468										YGL023C	0.449875	0.171631	0.235699	0.164271
YGL025C	0.292063		YGL025C	0.576826										YGL025C	0.479109	0.739082	0.162303	-0.089626
YGL026C	0.55081		YGL026C	0.800417										YGL026C	0.881805	0.306974	-0.070529	-0.601495
YGL027C	0.916118		YGL027C	0.968571										YGL027C	0.49572	-0.281447	-0.647189	0.310704
YGL028C	0.115513		YGL028C	0.0179884										YGL028C	0.88509	0.280572	0.610671	0.265148
YGL029W	0.682569		YGL029W	0.234373										YGL029W	-0.331634	0.747912	1.12454	1.68725
YGL030W	0.102426		YGL030W	0.988379										YGL030W	0.101266	-0.072509	0.072986	0.069909
YGL031C	0.580173		YGL031C	0.322518										YGL031C	0.060171	0.085872	-0.007618	0.299998
YGL032C	0.543123		YGL032C	0.599642										YGL032C	-0.562967	0.076727	0.038192	-0.486205
YGL033W	0.561538		YGL033W	0.879198										YGL033W	-2.53945	0.121048	0.246242	-0.1786
YGL035C	0.705918		YGL035C	0.321694										YGL035C	-0.526767	-0.245989	0.176587	-0.070757
YGL036W	0.148367		YGL036W	0.0876643										YGL036W	-0.786006	-0.388402	-0.484443	-0.293855
YGL037C	0.0607951		YGL037C	0.150074										YGL037C	-0.790599	-0.858187	-0.958104	-1.4008
YGL038C	0.437407		YGL038C	0.0118997										YGL038C	-0.096954	0.221623	-0.982924	0.230067
YGL039W	0.926796		YGL039W	0.653792										YGL039W	0.559061	0.238805	-0.443291	-0.969227
YGL040C	0.325923		YGL040C	0.474797										YGL040C	0.505794	0.122497	0.141857	0.004852
YGL041C-B	0.336951		YGL041C-B	0.962504										YGL041C-B	-2.53217	0.064696	-0.663093	-0.072804
YGL043W	0.311788		YGL043W	0.301679										YGL043W	-0.01578	0.122566	-0.051811	0.380632
YGL044C	0.0423367		YGL044C	0.0840574										YGL044C	-0.20522	0.276475	-0.234506	0.361159
YGL045W	0.556673		YGL045W	0.138812										YGL045W	-0.772869	-0.43258	0.068984	-0.678834
YGL047W	0.233555		YGL047W	0.291258										YGL047W	-0.335363	-0.435137	-0.753945	-1.27918
YGL048C	0.293881		YGL048C	0.589469										YGL048C	0.42266	0.072414	0.141836	-0.511866
YGL049C	0.681093		YGL049C	0.790401										YGL049C	0.433339	0.105532	-0.126704	-0.215075
YGL050W	0.803356		YGL050W	0.284792										YGL050W	-0.161514	0.350026	0.083371	0.123049
YGL051W	0.310442		YGL051W	0.128296										YGL051W	-4.07323	-1.64381	-1.25	-1.08609
YGL053W	0.103115		YGL053W	0.321789										YGL053W	-0.395247	-0.389743	-0.549647	-1.35571
YGL054C	0.385948		YGL054C	0.792377										YGL054C	-0.346119	-0.451998	-0.06268	0.223528
YGL055W	0.543045		YGL055W	0.713062										YGL055W	0.032872	0.383555	-0.485424	-1.10293
YGL056C	0.928641		YGL056C	0.728463										YGL056C	-0.186858	-0.132303	0.23426	0.352702
YGL057C	0.426881		YGL057C	0.463464										YGL057C	-0.881695	-0.794566	-0.101715	-0.045651
YGL058W	0.278286		YGL058W	0.908507										YGL058W	-0.027612	-0.609327	-0.010025	0.455265
YGL059W	0.145279		YGL059W	0.372849										YGL059W	-0.369061	-0.365597	-0.592347	-1.80606
YGL060W	0.149619		YGL060W	0.722801										YGL060W	-0.383041	-0.486695	-0.235043	0.177644
YGL061C	0.387031		YGL061C	0.288368										YGL061C	-0.247248	0.269126	-0.044341	0.779526
YGL062W	0.234949		YGL062W	0.29022										YGL062W	0.262923	0.332292	0.594591	0.971639
YGL063W	0.0145297		YGL063W	0.252748										YGL063W	0.560674	0.607436	0.535648	0.248542
YGL064C	0.857674		YGL064C	0.69947										YGL064C	-0.583385	-0.100576	0.367244	0.310421
YGL065C	0.645787		YGL065C	0.0502186										YGL065C	0.476955	0.370328	-0.111174	0.4339
YGL066W	0.803696		YGL066W	0.44831										YGL066W	0.441971	-0.022898	-0.228437	-0.281397
YGL067W	0.324698		YGL067W	0.275862										YGL067W	-0.344777	-0.377705	-0.097414	-0.138762
YGL068W	0.22631		YGL068W	0.599711										YGL068W	0.162148	-0.460427	0.353638	0.07271
YGL070C	0.768383		YGL070C	0.709346										YGL070C	-0.140744	-0.344766	0.313837	1.01037
YGL071W	0.800987		YGL071W	0.984579										YGL071W	0.29296	0.661603	-0.149843	-0.694457
YGL073W	0.761388		YGL073W	0.511443										YGL073W	-0.208343	0.009607	0.090698	-0.534416
YGL075C	0.268164		YGL075C	0.617586										YGL075C	-1.54083	-0.373616	-0.587314	0.069804
YGL076C	0.590418		YGL076C	0.475592										YGL076C	0.195796	0.012027	-0.027997	0.313542
YGL077C	0.086896		YGL077C	0.0674832										YGL077C	0.445343	0.630812	0.337781	0.781034
YGL078C	0.136668		YGL078C	0.433822										YGL078C	0.716634	0.162648	0.460069	1.55901
YGL079W	0.818389		YGL079W	0.660928										YGL079W	-0.110052	-0.28492	0.201389	0.073598
YGL080W	0.0416803		YGL080W	0.80526										YGL080W	-0.343625	0.077303	-0.301338	-0.148666
YGL081W	0.650571		YGL081W	0.309039										YGL081W	-1.52864	0.053233	0.368446	0.172112
YGL082W	0.905975		YGL082W	0.353565										YGL082W	0.53365	-0.079311	-0.395424	-0.338699
YGL083W	0.158646		YGL083W	0.688553										YGL083W	-0.095165	0.070073	-0.056554	-0.229632
YGL084C	0.565665		YGL084C	0.211473										YGL084C	0.579058	-0.387187	-0.05994	-0.794998
YGL085W	0.0595594		YGL085W	0.311093										YGL085W	0.173103	0.217319	0.208951	0.066448
YGL086W	0.00620427		YGL086W	0.00738041										YGL086W	-0.302946	0.248644	-0.297098	0.254477
YGL087C	0.329484		YGL087C	0.135068										YGL087C	-0.433195	-0.896941	-0.118886	-0.579011
YGL089C	0.529996		YGL089C	0.98743										YGL089C	-0.683964	0.524806	0.032251	-0.54595
YGL090W	0.141569		YGL090W	0.643143										YGL090W	-0.955808	0.30221	-0.603274	-0.06912
YGL091C	0.789735		YGL091C	0.840741										YGL091C	0.093253	-0.142351	-0.190554	0.08441
YGL092W	0.698202		YGL092W	0.301819										YGL092W	0.230817	0.865748	-0.074277	0.278566
YGL093W	0.318559		YGL093W	0.261964										YGL093W	-0.15978	0.085949	-0.545356	0.219054
YGL094C	0.364575		YGL094C	0.948793										YGL094C	0.040668	-0.17582	0.008784	0.206651
YGL095C	0.32786		YGL095C	0.0632057										YGL095C	-0.381849	-0.60992	-0.105843	-0.499418
YGL096W	0.369		YGL096W	0.661859										YGL096W	-1.18119	0.201279	-0.246548	-0.774534
YGL097W	0.369175		YGL097W	0.597747										YGL097W	1.13036	-0.110888	0.235614	0.716523
YGL098W	0.38148		YGL098W	0.30961										YGL098W	-0.741639	0.880989	-0.139689	0.271618
YGL099W	0.147154		YGL099W	0.392867										YGL099W	0.739966	0.156517	0.458014	0.921277
YGL100W	0.935276		YGL100W	0.8653										YGL100W	0.129068	-0.168636	-0.105171	0.260901
YGL101W	0.109113		YGL101W	0.892084										YGL101W	0.444933	-0.397145	0.313631	0.561167
YGL103W	0.175456		YGL103W	0.986325										YGL103W	0.101567	-0.263425	0.181666	0.274992
YGL104C	0.249866		YGL104C	0.397365										YGL104C	-0.458555	-0.227662	-0.190053	-1.39988
YGL105W	0.48586		YGL105W	0.96106										YGL105W	0.649731	-0.319052	0.014434	0.360681
YGL106W	0.284481		YGL106W	0.804654										YGL106W	0.411396	-0.052032	0.144849	0.100299
YGL107C	0.0702199		YGL107C	0.205189										YGL107C	0.172574	0.153136	0.13816	0.076461
YGL108C	0.536812		YGL108C	0.543324										YGL108C	0.493322	-0.0011	-0.028558	0.016139
YGL110C	0.391351		YGL110C	0.45596										YGL110C	0.760555	0.699081	0.131076	0.048438
YGL111W	0.109994		YGL111W	0.543457										YGL111W	0.233459	-0.082728	0.332172	1.21003
YGL112C	0.20049		YGL112C	0.769566										YGL112C	0.792536	-0.903531	0.403049	0.407218
YGL113W	0.8731		YGL113W	0.86195										YGL113W	-0.454595	-0.228279	0.301792	0.357287
YGL114W	0.403267		YGL114W	0.689305										YGL114W	0.829078	0.717269	0.126955	-0.219804
YGL115W	0.733062		YGL115W	0.225702										YGL115W	0.482198	-0.444894	-0.184863	-0.204504
YGL116W	0.000176973		YGL116W	0.826725										YGL116W	-0.04138	0.031773	-0.041357	-0.017907
YGL117W	0.453592		YGL117W	0.359834										YGL117W	-0.926762	-0.293657	-0.067679	-1.31214
YGL119W	0.111734		YGL119W	0.83418										YGL119W	0.450857	0.45028	0.315036	-0.260768
YGL120C	0.183855		YGL120C	0.0300431										YGL120C	0.478867	1.40455	0.883689	1.27787
YGL121C	0.860922		YGL121C	0.419222										YGL121C	-0.32505	-0.257948	0.206944	-2.02199
YGL122C	0.843455		YGL122C	0.249625										YGL122C	-0.259902	0.715933	0.434077	0.297043
YGL123W	0.334083		YGL123W	0.979658										YGL123W	0.02645	-0.273824	0.09918	0.291907
YGL124C	0.702174		YGL124C	0.994102										YGL124C	-0.02473	0.260835	0.075236	-0.256046
YGL125W	0.162379		YGL125W	0.366026										YGL125W	0.424155	-1.1153	0.24871	-0.238238
YGL126W	0.0451329		YGL126W	0.495345										YGL126W	0.700773	-0.010779	0.80791	-1.4741
YGL127C	0.701802		YGL127C	0.191332										YGL127C	-0.245253	-0.227686	0.747606	-0.432209
YGL128C	0.636009		YGL128C	0.595446										YGL128C	-1.17073	0.086313	0.253994	-0.571386
YGL129C	0.589479		YGL129C	0.268886										YGL129C	0.602489	-0.246135	-0.085244	-0.093499
YGL130W	0.671117		YGL130W	0.770634										YGL130W	0.412615	0.35586	-0.113657	-0.161104
YGL131C	0.852218		YGL131C	0.576291										YGL131C	-0.521425	-0.421868	0.322034	0.050799
YGL133W	0.476826		YGL133W	0.667345										YGL133W	0.027227	0.067054	0.747635	-0.249186
YGL134W	0.850365		YGL134W	0.396701										YGL134W	-0.217769	0.700741	0.133621	0.114712
YGL135W	0.899029		YGL135W	0.552029										YGL135W	0.028591	-0.009104	-0.020706	0.111147
YGL136C	0.201075		YGL136C	0.472194										YGL136C	-0.631124	-0.026971	-0.320232	-0.617103
YGL137W	0.484509		YGL137W	0.575788										YGL137W	0.88131	0.409386	0.021449	-0.048968
YGL138C	0.574172		YGL138C	0.420895										YGL138C	-2.8703	-0.511815	0.335936	-0.063926
YGL139W	0.0121007		YGL139W	0.992412										YGL139W	0.174159	-0.299301	0.167661	0.306522
YGL140C	0.56921		YGL140C	0.483217										YGL140C	0.872757	-0.008669	-0.095257	-0.328769
YGL141W	0.192775		YGL141W	0.549793										YGL141W	-0.125177	0.074265	-0.238931	-0.947572
YGL142C	0.0584399		YGL142C	0.120894										YGL142C	-0.302547	-0.498266	-0.25154	-0.337599
YGL143C	0.0142787		YGL143C	0.0682005										YGL143C	0.113785	0.192639	0.108792	0.155229
YGL144C	0.965227		YGL144C	0.256205										YGL144C	0.171515	0.763282	-0.191355	0.30748
YGL145W	0.410213		YGL145W	0.84945										YGL145W	-0.704694	-0.388514	-0.100052	0.635229
YGL146C	0.00327538		YGL146C	0.603485										YGL146C	-0.62292	0.10646	-0.629363	-0.649144
YGL147C	0.539145		YGL147C	0.879087										YGL147C	0.178002	-0.470953	-0.010959	0.695128
YGL148W	0.384354		YGL148W	0.189604										YGL148W	0.957579	0.237263	0.175889	0.447438
YGL150C	0.404302		YGL150C	0.659543										YGL150C	0.829484	0.299412	0.125637	-0.076647
YGL151W	0.959052		YGL151W	0.326669										YGL151W	0.190492	-0.118727	-0.167438	-0.425239
YGL153W	0.132478		YGL153W	0.946675										YGL153W	-0.312173	0.285448	-0.203324	-0.337773
YGL154C	0.0345718		YGL154C	0.733822										YGL154C	-1.04766	0.008464	-0.939635	-0.021999
YGL155W	0.0731328		YGL155W	0.482439										YGL155W	0.081853	0.014092	0.103206	0.51074
YGL156W	0.244547		YGL156W	0.449012										YGL156W	0.703649	-0.176377	0.298547	-2.19747
YGL157W	0.800537		YGL157W	0.521935										YGL157W	-1.4173	0.0217	0.723659	-0.629546
YGL158W	0.662828		YGL158W	0.874907										YGL158W	-3.14396	-0.655765	0.822139	0.43803
YGL159W	0.159602		YGL159W	0.858477										YGL159W	-0.084738	0.323975	-0.14308	-0.204515
YGL160W	0.00677862		YGL160W	0.723757										YGL160W	-0.093795	0.105411	-0.095814	-0.287456
YGL161C	0.893696		YGL161C	0.715328										YGL161C	0.449595	0.316117	-0.319896	-0.898689
YGL162W	0.242139		YGL162W	0.0456495										YGL162W	-0.699664	-0.276749	-0.299985	-0.239656
YGL163C	0.362446		YGL163C	0.290555										YGL163C	-0.030049	0.061335	-0.1369	0.179656
YGL164C	0.397433		YGL164C	0.823063										YGL164C	-0.36972	0.265351	-0.060087	-0.147545
YGL166W	0.376375		YGL166W	0.799073										YGL166W	-0.330109	0.354457	-0.064922	-0.698173
YGL167C	0.684065		YGL167C	0.842512										YGL167C	0.671063	0.799966	-0.199617	-0.477369
YGL168W	0.244955		YGL168W	0.217543										YGL168W	-3.75628	-0.368209	-1.59089	-0.774709
YGL169W	0.583423		YGL169W	0.519785										YGL169W	-0.028362	-0.020833	0.215197	0.670134
YGL170C	0.465172		YGL170C	0.602093										YGL170C	-2.4137	-0.796856	-0.13218	0.128896
YGL171W	0.297036		YGL171W	0.340671										YGL171W	0.128779	0.37323	0.39015	1.46002
YGL172W	0.148686		YGL172W	0.84631										YGL172W	0.105157	-0.196427	0.170808	0.11881
YGL173C	0.203253		YGL173C	0.292981										YGL173C	0.361319	-0.047987	0.181782	-0.016179
YGL174W	0.935975		YGL174W	0.265456										YGL174W	0.250411	0.17805	-0.306622	0.461212
YGL175C	0.534521		YGL175C	0.41683										YGL175C	-1.93425	0.066878	0.104989	0.508999
YGL176C	0.702744		YGL176C	0.91207										YGL176C	-0.062899	-0.475424	0.190781	0.359382
YGL178W	0.503893		YGL178W	0.362823										YGL178W	-1.18526	0.388829	0.007249	0.085105
YGL179C	0.760794		YGL179C	0.77583										YGL179C	-0.224736	0.480614	0.517562	-1.03897
YGL180W	0.56385		YGL180W	0.297886										YGL180W	0.113958	-0.758235	-1.13241	-2.30751
YGL181W	0.665633		YGL181W	0.383183										YGL181W	0.143289	-0.147528	-0.538257	-0.794944
YGL183C	0.219346		YGL183C	0.385836										YGL183C	-2.92036	-0.14351	-1.37788	-0.791668
YGL184C	0.443595		YGL184C	0.104158										YGL184C	-0.137855	-0.565897	-1.55183	-0.789685
YGL185C	0.304108		YGL185C	0.64455										YGL185C	-0.123753	0.058831	-0.389405	-0.254633
YGL186C	0.712886		YGL186C	0.794542										YGL186C	0.171677	0.425813	-0.494107	-0.85372
YGL187C	0.273775		YGL187C	0.528609										YGL187C	0.045874	-1.17032	0.123614	0.052629
YGL188C-A	0.692228		YGL188C-A	0.128187										YGL188C-A	-0.866771	0.475222	0.269978	0.314103
YGL189C	0.538406		YGL189C	0.980425										YGL189C	-0.337499	-0.322146	0.0203853	0.342593
YGL190C	0.914727		YGL190C	0.292735										YGL190C	0.264426	-0.067328	-0.346789	-0.199441
YGL191W	0.125596		YGL191W	0.703939										YGL191W	0.149021	-0.121705	0.099371	0.366831
YGL192W	0.958694		YGL192W	0.385639										YGL192W	0.321571	-0.262507	-0.282333	-0.04767
YGL194C	0.397745		YGL194C	0.408547										YGL194C	-2.2941	-0.121494	-0.371684	-0.839912
YGL195W	0.51069		YGL195W	0.398628										YGL195W	0.690503	0.183288	-0.011596	0.029435
YGL196W	0.329205		YGL196W	0.169518										YGL196W	0.025847	-0.323423	0.094019	-0.184802
YGL197W	0.742602		YGL197W	0.95429										YGL197W	0.266773	0.426557	-0.106886	-0.492672
YGL198W	0.553673		YGL198W	0.00735834										YGL198W	0.319289	-0.55295	-0.026983	-0.540313
YGL200C	0.0167783		YGL200C	0.982026										YGL200C	0.31756	-0.35568	0.334756	0.336142
YGL201C	0.449254		YGL201C	0.872088										YGL201C	0.422751	0.212531	0.03377	-0.321246
YGL202W	0.584582		YGL202W	0.937557										YGL202W	0.641214	0.548014	-0.085697	-0.449825
YGL203C	0.260125		YGL203C	0.747662										YGL203C	-0.068438	0.422255	-0.027081	-0.17309
YGL205W	0.775123		YGL205W	0.772402										YGL205W	0.677631	0.19947	-0.312551	-0.437369
YGL206C	0.669925		YGL206C	0.261434										YGL206C	0.733358	-0.32411	-0.200531	-0.824026
YGL207W	0.829876		YGL207W	0.437949										YGL207W	0.803848	0.389665	-0.458299	0.038101
YGL208W	0.225009		YGL208W	0.180584										YGL208W	-0.469408	-0.447537	-0.216392	-0.815838
YGL209W	0.936993		YGL209W	0.879612										YGL209W	-1.97122	-0.641006	1.61512	0.94445
YGL210W	0.0234289		YGL210W	0.504817										YGL210W	0.317801	-0.004987	0.29523	0.659047
YGL211W	0.0518141		YGL211W	0.598121										YGL211W	0.460767	-0.114806	0.391267	0.738963
YGL212W	0.155316		YGL212W	0.857817										YGL212W	-0.698421	0.295494	-0.420011	-0.186108
YGL213C	0.74291		YGL213C	0.764611										YGL213C	0.163813	-0.506498	-0.065726	0.223551
YGL215W	0.573469		YGL215W	0.275902										YGL215W	-0.769946	0.737385	0.089252	0.27085
YGL216W	0.0338561		YGL216W	0.785247										YGL216W	-0.223591	-0.200258	-0.20099	0.416622
YGL219C	0.709721		YGL219C	0.0773637										YGL219C	0.408583	-0.376829	-0.139689	-0.481673
YGL220W	0.375633		YGL220W	0.915859										YGL220W	0.122352	-0.197405	0.618319	0.25794
YGL221C	0.0295037		YGL221C	0.347432										YGL221C	0.192602	-0.290256	0.175529	-0.070924
YGL222C	0.537962		YGL222C	0.69496										YGL222C	-2.48736	0.18565	0.148499	-0.587147
YGL223C	0.43783		YGL223C	0.399123										YGL223C	-0.240434	-0.38952	-0.023555	-0.062244
YGL224C	0.510989		YGL224C	0.51549										YGL224C	0.003419	0.024876	-0.198055	-1.02216
YGL225W	0.428091		YGL225W	0.541777										YGL225W	0.466013	-0.038513	0.052863	0.586036
YGL226C-A	0.675685		YGL226C-A	0.876857										YGL226C-A	-0.430766	-0.774403	0.121989	0.520713
YGL226W	0.312666		YGL226W	0.00945747										YGL226W	-0.071057	-0.094855	-0.234463	-0.097716
YGL227W	0.574496		YGL227W	0.245305										YGL227W	0.114918	-0.465285	-0.977569	-1.10027
YGL228W	0.700511		YGL228W	0.241448										YGL228W	0.425194	-0.141409	-0.138531	-0.328827
YGL229C	0.249567		YGL229C	0.281357										YGL229C	-0.61223	-0.553396	-0.254082	-1.54746
YGL230C	0.369295		YGL230C	0.106533										YGL230C	-2.94528	-0.180908	-0.613341	-0.128622
YGL231C	0.558936		YGL231C	0.290777										YGL231C	-0.378205	-0.244682	0.035113	-0.08344
YGL232W	0.563352		YGL232W	0.513317										YGL232W	-0.55743	-0.741278	0.055655	0.015508
YGL233W	0.667004		YGL233W	0.543278										YGL233W	0.280411	0.457633	-0.075295	-0.031158
YGL234W	0.489207		YGL234W	0.0599201										YGL234W	0.762022	0.528668	0.01292	0.437464
YGL235W	0.520825		YGL235W	0.16085										YGL235W	-3.81591	-0.624102	0.124867	-0.367969
YGL236C	0.878199		YGL236C	0.812308										YGL236C	-0.360854	-0.460259	0.243747	0.245835
YGL237C	0.681838		YGL237C	0.854903										YGL237C	0.20426	0.223688	-0.695564	-0.358793
YGL238W	0.766994		YGL238W	0.270667										YGL238W	0.129675	0.111179	-0.057815	0.041878
YGL240W	0.616634		YGL240W	0.0805557										YGL240W	-2.14668	-0.088756	0.397751	-0.11463
YGL241W	0.556561		YGL241W	0.923235										YGL241W	0.346061	0.815949	-0.030827	-0.639583
YGL242C	0.441128		YGL242C	0.259842										YGL242C	0.028994	-0.603643	0.312637	-0.239173
YGL243W	0.660013		YGL243W	0.433617										YGL243W	-0.988999	0.020699	0.253954	0.197786
YGL244W	0.179419		YGL244W	0.340257										YGL244W	-0.151187	-0.285945	-0.274415	-0.073295
YGL245W	0.517094		YGL245W	0.87592										YGL245W	0.20307	0.282997	-0.005454	-0.189685
YGL246C	0.360607		YGL246C	0.494692										YGL246C	1.16918	0.006192	0.260173	0.742651
YGL247W	0.407471		YGL247W	0.457982										YGL247W	-0.964583	0.230477	-0.141192	0.015234
YGL248W	0.349603		YGL248W	0.688802										YGL248W	-0.185135	0.205222	-0.769028	-0.671577
YGL249W	0.466296		YGL249W	0.0842867										YGL249W	-2.13016	-0.440447	-0.11288	-0.575785
YGL250W	0.0289463		YGL250W	0.176232										YGL250W	-0.608163	-0.727378	-0.666144	-1.30474
YGL251C	0.68887		YGL251C	0.277955										YGL251C	-0.642051	-0.076636	0.196274	-0.027869
YGL252C	0.692144		YGL252C	0.838863										YGL252C	0.645351	0.310723	-0.200917	-0.183013
YGL253W	0.581522		YGL253W	0.45215										YGL253W	0.975618	0.567777	-0.12562	0.042756
YGL254W	0.332678		YGL254W	0.218847										YGL254W	-1.10056	-0.11589	-0.296109	-0.245125
YGL255W	0.752244		YGL255W	0.869463										YGL255W	0.006361	0.049968	-0.015205	-0.076209
YGL256W	0.828422		YGL256W	0.756453										YGL256W	-0.543235	0.138117	0.308074	-0.324112
YGL257C	0.588459		YGL257C	0.110919										YGL257C	0.482597	-0.57906	-0.067492	-0.405723
YGL258W-A	0.353697		YGL258W-A	0.14793										YGL258W-A	-2.09707	-1.37333	-0.490601	-0.84773
[truncated: 3,668 more rows]

## Sheet: PRSq
TF	Target Gene				TF	Target Gene			TF	Target Gene
YAL051w	YAL016w		YMR164c		YBL005w	YAL003w	0.539532		YMR164c	YPR082c	4.82872e-05	up		YMR164c	TF	#N/A
YAL051w	YAL025c		YHR178w		YBL005w	YAL005c	0.894171		YDR216w	YGL116w	0.000176973	down		YDR216w	TF	#N/A
YAL051w	YAL034w-a		YDR216w		YBL005w	YAL025c	0.242948		YBL005w	YDR418w	0.00185216	down		YBL005w	TF	#N/A
YAL051w	YAL035w		YGL166w		YBL005w	YAL034w-a	0.714962		YDR216w	YJR140c	0.00216553	up		YGL181w	TF	#N/A
YAL051w	YAL036c		YOR038c		YBL005w	YAL036c	0.707321		YGL181w	YOL041c	0.00258535	up		YHR178w	TF	#N/A
YAL051w	YAL067c		YBL005w		YBL005w	YAL059w	0.337337		YHR178w	YOL041c	0.00258535	up		YOR038c	TF	#N/A
YAL051w	YAR035w		YGL181w		YBL005w	YAL061w	0.89426		YBL005w	YCR057c	0.00350656	up		YGL166w	TF	#N/A
YAL051w	YAR071w				YBL005w	YAL065c	0.557277		YDR216w	YCR057c	0.00350656	up		YPR082c	target	up
YAL051w	YBL008w				YBL005w	YAR071w	0.655116		YHR178w	YCR057c	0.00350656	up		YGL116w	target	down
YAL051w	YBL049w				YBL005w	YAR075w	0.435405		YDR216w	YIL146c	0.00371978	down		YDR418w	target	down
YAL051w	YBL075c				YBL005w	YBL004w	0.438684		YOR038c	YBR010w	0.00539263	down		YJR140c	target	up
YAL051w	YBL089w				YBL005w	YBL005w	0.393866		YBL005w	YKR092c	0.0060728	up		YOL041c	target	up
YAL051w	YBL095w				YBL005w	YBL005w-a	0.589742		YDR216w	YDL060w	0.00667382	up		YCR057c	target	up
YAL051w	YBR006w				YBL005w	YBL006c	0.537772		YDR216w	YNL194c	0.00818158	down		YIL146c	target	down
YAL051w	YBR019c				YBL005w	YBL007c	0.402142		YHR178w	YNL194c	0.00818158	down		YBR010w	target	down
YAL051w	YBR020w				YBL005w	YBL011w	0.457959		YDR216w	YIL120w	0.00948874	down		YKR092c	target	up
YAL051w	YBR053c				YBL005w	YBL028c	0.8752		YDR216w	YDL170w	0.00960438	down		YDL060w	target	up
YAL051w	YBR054w				YBL005w	YBL029w	0.292649		YHR178w	YDL063c	0.0101653	up		YNL194c	target	down
YAL051w	YBR072w				YBL005w	YBL036c	0.538887		YMR164c	YDL063c	0.0101653	up		YIL120w	target	down
YAL051w	YBR074w				YBL005w	YBL039c	0.171988		YBL005w	YOL083w	0.0102524	down		YDL170w	target	down
YAL051w	YBR117c				YBL005w	YBL041w	0.666775		YGL181w	YOL083w	0.0102524	down		YDL063c	target	up
YAL051w	YBR127c				YBL005w	YBL042c	0.421433		YBL005w	YLR264w	0.0109385	up		YOL083w	target	down
YAL051w	YBR150c				YBL005w	YBL043w	0.621793		YBL005w	YOR056c	0.0125881	up		YLR264w	target	up
YAL051w	YBR151w				YBL005w	YBL049w	0.393253		YDR216w	YOR056c	0.0125881	up		YOR056c	target	up
YAL051w	YBR154c				YBL005w	YBL054w	0.918595		YBL005w	YMR131c	0.0136949	up		YMR131c	target	up
YAL051w	YBR159w				YBL005w	YBL102w	0.384602		YDR216w	YNR046w	0.0136976	up		YNR046w	target	up
YAL051w	YBR187w				YBL005w	YBL103c	0.625187		YBL005w	YDR468c	0.014667	down		YDR468c	target	down
YAL051w	YBR200w				YBL005w	YBR008c	0.468874		YBL005w	YER042w	0.01479	down		YER042w	target	down
YAL051w	YBR214w				YBL005w	YBR034c	0.152676		YBL005w	YOL077c	0.01553	up		YOL077c	target	up
YAL051w	YBR222c				YBL005w	YBR047w	0.0989613		YBL005w	YPL043w	0.0168277	up		YPL043w	target	up
YAL051w	YBR295w				YBL005w	YBR054w	0.997794		YDR216w	YPL043w	0.0168277	up		YOL010w	target	up
YAL051w	YCL042w				YBL005w	YBR072w	0.360866		YHR178w	YPL043w	0.0168277	up		YER126c	target	up
YAL051w	YCL048w				YBL005w	YBR084w	0.118276		YBL005w	YOL010w	0.0183487	up		YOR031w	target	down
YAL051w	YCR005c				YBL005w	YBR092c	0.81089		YBL005w	YER126c	0.0185592	up		YMR018w	target	down
YAL051w	YCR010c				YBL005w	YBR093c	0.446495		YDR216w	YER126c	0.0185592	up		YOR095c	target	up
YAL051w	YCR020c-a				YBL005w	YBR126c	0.264653		YHR178w	YER126c	0.0185592	up		YKL096w	target	down
YAL051w	YCR081w				YBL005w	YBR142w	0.241125		YGL166w	YOR031w	0.0199466	down		YKL051w	target	up
YAL051w	YDL024c				YBL005w	YBR145w	0.889088		YDR216w	YMR018w	0.0201667	down		YOR220w	target	down
YAL051w	YDL037c				YBL005w	YBR147w	0.244336		YBL005w	YOR095c	0.020921	up		YER163c	target	up
YAL051w	YDL038c				YBL005w	YBR149w	0.994213		YHR178w	YKL096w	0.0213542	down		YBL078c	target	down
YAL051w	YDL039c				YBL005w	YBR169c	0.740522		YBL005w	YKL051w	0.0231384	up		YHR089c	target	up
YAL051w	YDL078c				YBL005w	YBR177c	0.625145		YDR216w	YOR220w	0.02365	down		YLR080w	target	down
YAL051w	YDL110c				YBL005w	YBR201w	0.707815		YGL166w	YOR220w	0.02365	down		YNL112w	target	up
YAL051w	YDL132w				YBL005w	YBR214w	0.358853		YGL181w	YER163c	0.0237917	up		YBR021w	target	up
YAL051w	YDL135c				YBL005w	YBR244w	0.330258		YMR164c	YBL078c	0.024112	down		YHR172w	target	up
YAL051w	YDL145c				YBL005w	YBR256c	0.786345		YBL005w	YHR089c	0.0246288	up		YML123c	target	down
YAL051w	YDL178w				YBL005w	YBR296c	0.227407		YGL166w	YLR080w	0.0246533	down		YDR299w	target	up
YAL051w	YDL179w				YBL005w	YCL026c-a	0.401548		YHR178w	YNL112w	0.0247571	up		YLR413w	target	up
YAL051w	YDL223c				YBL005w	YCL026c-b	0.952815		YDR216w	YBR021w	0.0262569	up		YNL248c	target	up
YAL051w	YDR034w-b				YBL005w	YCL030c	0.833088		YHR178w	YBR021w	0.0262569	up		YFL023w	target	up
YAL051w	YDR071c				YBL005w	YCL037c	0.748754		YHR178w	YHR172w	0.026887	up		YNL065w	target	up
YAL051w	YDR083w				YBL005w	YCL040w	0.946343		YBL005w	YML123c	0.0270516	down		YLR151c	target	down
YAL051w	YDR111c				YBL005w	YCL042w	0.835127		YDR216w	YML123c	0.0270516	down		YGL009c	target	down
YAL051w	YDR207c				YBL005w	YCL043c	0.145585		YHR178w	YML123c	0.0270516	down		YMR020w	target	down
YAL051w	YDR208w				YBL005w	YCL054w	0.0559295		YOR038c	YML123c	0.0270516	down		YDR101c	target	up
YAL051w	YDR244w				YBL005w	YCL059c	0.230595		YBL005w	YDR299w	0.0274782	up		YIL172c	target	down
YAL051w	YDR255c				YBL005w	YCR005c	0.106191		YBL005w	YLR413w	0.0280892	up		YGR187c	target	up
YAL051w	YDR256c				YBL005w	YCR010c	0.35717		YBL005w	YNL248c	0.0289327	up		YIL169c	target	up
YAL051w	YDR281c				YBL005w	YCR053w	0.429535		YHR178w	YFL023w	0.0303163	up		YJL198w	target	up
YAL051w	YDR384c				YBL005w	YCR057c	0.00350656		YHR178w	YNL065w	0.0310523	up		YCR021c	target	down
YAL051w	YDR492w				YBL005w	YCR061w	0.239603		YDR216w	YLR151c	0.031893	down		YMR056c	target	up
YAL051w	YDR528w				YBL005w	YCR102c	0.435492		YDR216w	YGL009c	0.0319361	down		YIL162w	target	up
YAL051w	YDR533c				YBL005w	YDL014w	0.192414		YBL005w	YMR020w	0.0319513	down		YPL164c	target	down
YAL051w	YDR536w				YBL005w	YDL020c	0.606557		YDR216w	YDR101c	0.0326355	up		YOR340c	target	up
YAL051w	YEL011w				YBL005w	YDL029w	0.718365		YOR038c	YDR101c	0.0326355	up		YFL030w	target	up
YAL051w	YEL040w				YBL005w	YDL108w	0.613347		YBL005w	YIL172c	0.032928	down		YOR020c	target	down
YAL051w	YEL060c				YBL005w	YDL124w	0.428829		YHR178w	YGR187c	0.0332672	up		YDL031w	target	up
YAL051w	YER015w				YBL005w	YDL139c	0.334536		YBL005w	YIL169c	0.0336876	up		YPL200w	target	down
YAL051w	YER024w				YBL005w	YDL159w-a	0.515047		YDR216w	YIL169c	0.0336876	up		YKL217w	target	down
YAL051w	YER065c				YBL005w	YDL222c	0.696559		YHR178w	YIL169c	0.0336876	up		YGR200c	target	up
YAL051w	YER103w				YBL005w	YDL229w	0.409279		YDR216w	YJL198w	0.034574	up		YDR492w	target	up
YAL051w	YGL045w				YBL005w	YDL248w	0.248205		YDR216w	YCR021c	0.0352501	down		YMR049c	target	up
YAL051w	YGL063w				YBL005w	YDR006c	0.786376		YHR178w	YMR056c	0.0355019	up		YBR210w	target	down
YAL051w	YGL143c				YBL005w	YDR009w	0.226699		YGL181w	YIL162w	0.0359066	up		YDR317w	target	down
YAL051w	YGL201c				YBL005w	YDR011w	0.317023		YDR216w	YPL164c	0.0371418	down		YFL056c	target	down
YAL051w	YGL205w				YBL005w	YDR021w	0.943468		YBL005w	YOR340c	0.0389067	up		YMR266w	target	up
YAL051w	YGL207w				YBL005w	YDR025w	0.754497		YDR216w	YOR340c	0.0389067	up		YDL017w	target	down
YAL051w	YGL235w				YBL005w	YDR033w	0.0479402		YHR178w	YFL030w	0.0394204	up		YDR033w	target	up
YAL051w	YGL237c				YBL005w	YDR034w-b	0.138727		YBL005w	YOR020c	0.0401408	down		YJR096w	target	down
YAL051w	YGR035c				YBL005w	YDR043c	0.256883		YHR178w	YDL031w	0.0401757	up		YHR128w	target	up
YAL051w	YGR052w				YBL005w	YDR054c	0.924426		YDR216w	YPL200w	0.0414892	down
YAL051w	YGR065c				YBL005w	YDR055w	0.765562		YDR216w	YKL217w	0.0428776	down
YAL051w	YGR079w				YBL005w	YDR062w	0.547257		YBL005w	YGR200c	0.0430814	up
YAL051w	YGR081c				YBL005w	YDR070c	0.765213		YBL005w	YDR492w	0.0435862	up
YAL051w	YGR088w				YBL005w	YDR072c	0.353555		YBL005w	YMR049c	0.0445622	up
YAL051w	YGR109c				YBL005w	YDR073w	0.168757		YHR178w	YMR049c	0.0445622	up
YAL051w	YGR109w-a				YBL005w	YDR074w	0.554029		YHR178w	YBR210w	0.0449466	down
YAL051w	YGR109w-b				YBL005w	YDR093w	0.373112		YMR164c	YDR317w	0.0451313	down
YAL051w	YGR138c				YBL005w	YDR165w	0.78771		YBL005w	YFL056c	0.0464648	down
YAL051w	YGR188c				YBL005w	YDR171w	0.296539		YHR178w	YFL056c	0.0464648	down
YAL051w	YGR201c				YBL005w	YDR184c	0.9716		YDR216w	YMR266w	0.0469715	up
YAL051w	YGR256w				YBL005w	YDR214w	0.790427		YDR216w	YDL017w	0.0477452	down
YAL051w	YGR271c-a				YBL005w	YDR258c	0.35357		YBL005w	YDR033w	0.0479402	up
YAL051w	YGR289c				YBL005w	YDR297w	0.196123		YHR178w	YDR033w	0.0479402	up
YAL051w	YHL017w				YBL005w	YDR299w	0.0274782		YBL005w	YJR096w	0.0483765	down
YAL051w	YHR041c				YBL005w	YDR321w	0.13428		YBL005w	YHR128w	0.0495213	up
YAL051w	YHR042w				YBL005w	YDR324c	0.246836
YAL051w	YHR049w				YBL005w	YDR345c	0.822942
YAL051w	YHR053c				YBL005w	YDR353w	0.567155
YAL051w	YHR087w				YBL005w	YDR361c	0.915605
YAL051w	YHR096c				YBL005w	YDR369c	0.528507
YAL051w	YHR113w				YBL005w	YDR380w	0.194028
YAL051w	YHR117w				YBL005w	YDR398w	0.194516
YAL051w	YHR139c				YBL005w	YDR399w	0.838285
YAL051w	YHR140w				YBL005w	YDR404c	0.849771
YAL051w	YHR160c				YBL005w	YDR405w	0.762102
YAL051w	YIL069c				YBL005w	YDR406w	0.645748
YAL051w	YIL113w				YBL005w	YDR415c	0.474699
YAL051w	YIL114c				YBL005w	YDR416w	0.536061
YAL051w	YIL120w				YBL005w	YDR418w	0.00185216
YAL051w	YIL160c				YBL005w	YDR447c	0.248406
YAL051w	YJL045w				YBL005w	YDR449c	0.661756
YAL051w	YJL141c				YBL005w	YDR450w	0.297889
YAL051w	YJL153c				YBL005w	YDR465c	0.69048
YAL051w	YJL179w				YBL005w	YDR468c	0.014667
YAL051w	YJL196c				YBL005w	YDR469w	0.268309
YAL051w	YJL200c				YBL005w	YDR492w	0.0435862
YAL051w	YJL218w				YBL005w	YDR496c	0.395781
YAL051w	YJR019c				YBL005w	YDR516c	0.571531
YAL051w	YJR069c				YBL005w	YDR533c	0.727132
YAL051w	YKL093w				YBL005w	YEL011w	0.322558
YAL051w	YKL146w				YBL005w	YEL020w-a	0.665973
YAL051w	YKL148c				YBL005w	YEL026w	0.589678
YAL051w	YKL163w				YBL005w	YEL039c	0.251361
YAL051w	YKL188c				YBL005w	YEL046c	0.151326
YAL051w	YKL201c				YBL005w	YEL054c	0.432331
YAL051w	YKL220c				YBL005w	YEL060c	0.706788
YAL051w	YKR009c				YBL005w	YEL071w	0.551781
YAL051w	YKR097w				YBL005w	YER006w	0.303619
YAL051w	YLL006w				YBL005w	YER037w	0.594509
YAL051w	YLL008w				YBL005w	YER042w	0.01479
YAL051w	YLL052c				YBL005w	YER052c	0.181221
YAL051w	YLR002c				YBL005w	YER062c	0.177528
YAL051w	YLR009w				YBL005w	YER067w	0.188617
YAL051w	YLR054c				YBL005w	YER069w	0.955957
YAL051w	YLR089c				YBL005w	YER072w	0.463439
YAL051w	YLR090w				YBL005w	YER103w	0.491658
YAL051w	YLR142w				YBL005w	YER110c	0.415781
YAL051w	YLR149c				YBL005w	YER126c	0.0185592
YAL051w	YLR162w				YBL005w	YER130c	0.343817
YAL051w	YLR164w				YBL005w	YER142c	0.418281
YAL051w	YLR174w				YBL005w	YER143w	0.282226
YAL051w	YLR176c				YBL005w	YER145c	0.575401
YAL051w	YLR177w				YBL005w	YER150w	0.353489
YAL051w	YLR178c				YBL005w	YER175c	0.54334
YAL051w	YLR197w				YBL005w	YER185w	0.452061
YAL051w	YLR284c				YBL005w	YFL014w	0.634662
YAL051w	YLR285w				YBL005w	YFL027c	0.5
YAL051w	YLR373c				YBL005w	YFL056c	0.0464648
YAL051w	YLR375w				YBL005w	YFL064c	0.402465
YAL051w	YLR401c				YBL005w	YFR006w	0.453839
YAL051w	YLR449w				YBL005w	YFR027w	0.595305
YAL051w	YML004c				YBL005w	YFR053c	0.663184
YAL051w	YML042w				YBL005w	YGL028c	0.115513
YAL051w	YML072c				YBL005w	YGL029w	0.682569
YAL051w	YML093w				YBL005w	YGL030w	0.102426
YAL051w	YML128c				YBL005w	YGL037c	0.0607951
YAL051w	YML131w				YBL005w	YGL039w	0.926796
YAL051w	YMR018w				YBL005w	YGL055w	0.543045
YAL051w	YMR043w				YBL005w	YGL062w	0.234949
YAL051w	YMR107w				YBL005w	YGL089c	0.529996
YAL051w	YMR113w				YBL005w	YGL111w	0.109994
YAL051w	YMR118c				YBL005w	YGL117w	0.453592
YAL051w	YMR169c				YBL005w	YGL120c	0.183855
YAL051w	YMR174c				YBL005w	YGL121c	0.860922
YAL051w	YMR175w				YBL005w	YGL141w	0.192775
YAL051w	YMR210w				YBL005w	YGL156w	0.244547
YAL051w	YMR224c				YBL005w	YGL157w	0.800537
YAL051w	YMR227c				YBL005w	YGL171w	0.297036
YAL051w	YMR250w				YBL005w	YGL179c	0.760794
YAL051w	YMR272c				YBL005w	YGL209w	0.936993
YAL051w	YMR303c				YBL005w	YGL253w	0.581522
YAL051w	YMR313c				YBL005w	YGL259w	0.594021
YAL051w	YMR322c				YBL005w	YGR008c	0.207461
YAL051w	YMR323w				YBL005w	YGR028w	0.364855
YAL051w	YNL002c				YBL005w	YGR032w	0.761833
YAL051w	YNL009w				YBL005w	YGR035c	0.418934
YAL051w	YNL117w				YBL005w	YGR079w	0.642385
YAL051w	YNL128w				YBL005w	YGR088w	0.749237
YAL051w	YNL141w				YBL005w	YGR103w	0.367722
YAL051w	YNL160w				YBL005w	YGR110w	0.0926513
YAL051w	YNL182c				YBL005w	YGR123c	0.370601
YAL051w	YNL194c				YBL005w	YGR142w	0.439631
YAL051w	YNL195c				YBL005w	YGR145w	0.369276
YAL051w	YNL202w				YBL005w	YGR159c	0.128165
YAL051w	YNL270c				YBL005w	YGR161c	0.221743
YAL051w	YNL299w				YBL005w	YGR162w	0.275599
YAL051w	YNL321w				YBL005w	YGR197c	0.992437
YAL051w	YNL322c				YBL005w	YGR200c	0.0430814
YAL051w	YNR001c				YBL005w	YGR209c	0.864635
YAL051w	YNR050c				YBL005w	YGR214w	0.511069
YAL051w	YOL002c				YBL005w	YGR224w	0.423674
YAL051w	YOL011w				YBL005w	YGR234w	0.261496
YAL051w	YOL041c				YBL005w	YGR243w	0.533317
YAL051w	YOL083w				YBL005w	YGR245c	0.132047
YAL051w	YOL084w				YBL005w	YGR248w	0.361027
YAL051w	YOL101c				YBL005w	YGR249w	0.332016
YAL051w	YOL119c				YBL005w	YGR271c-a	0.575865
YAL051w	YOL126c				YBL005w	YGR280c	0.232895
YAL051w	YOL147c				YBL005w	YGR281w	0.628498
YAL051w	YOL156w				YBL005w	YGR287c	0.345158
YAL051w	YOR017w				YBL005w	YHL011c	0.340564
YAL051w	YOR031w				YBL005w	YHL021c	0.560574
YAL051w	YOR042w				YBL005w	YHL030w	0.772085
YAL051w	YOR048c				YBL005w	YHL036w	0.0834323
YAL051w	YOR084w				YBL005w	YHR018c	0.805001
YAL051w	YOR100c				YBL005w	YHR029c	0.709543
YAL051w	YOR101w				YBL005w	YHR044c	0.674165
YAL051w	YOR117w				YBL005w	YHR052w	0.240836
YAL051w	YOR148c				YBL005w	YHR064c	0.59374
YAL051w	YOR153w				YBL005w	YHR066w	0.634739
YAL051w	YOR178c				YBL005w	YHR071w	0.355019
YAL051w	YOR180c				YBL005w	YHR087w	0.0757552
YAL051w	YOR184w				YBL005w	YHR088w	0.0520657
YAL051w	YOR186w				YBL005w	YHR089c	0.0246288
YAL051w	YOR190w				YBL005w	YHR092c	0.512125
YAL051w	YOR209c				YBL005w	YHR104w	0.0886411
YAL051w	YOR229w				YBL005w	YHR128w	0.0495213
YAL051w	YOR230w				YBL005w	YHR136c	0.164093
YAL051w	YOR268c				YBL005w	YHR138c	0.110026
YAL051w	YOR273c				YBL005w	YHR140w	0.0965923
YAL051w	YOR291w				YBL005w	YHR148w	0.555197
YAL051w	YOR298w				YBL005w	YHR162w	0.544738
YAL051w	YOR302w				YBL005w	YHR169w	0.0749736
YAL051w	YOR315w				YBL005w	YHR170w	0.141532
YAL051w	YOR317w				YBL005w	YHR197w	0.777635
YAL051w	YOR332w				YBL005w	YHR216w	0.598523
YAL051w	YOR348c				YBL005w	YIL035c	0.424461
YAL051w	YOR363c				YBL005w	YIL045w	0.491095
YAL051w	YPL016w				YBL005w	YIL056w	0.414119
YAL051w	YPL017c				YBL005w	YIL064w	0.353579
YAL051w	YPL036w				YBL005w	YIL091c	0.669106
YAL051w	YPL051w				YBL005w	YIL099w	0.451519
YAL051w	YPL054w				YBL005w	YIL103w	0.98591
YAL051w	YPL092w				YBL005w	YIL113w	0.300062
YAL051w	YPL095c				YBL005w	YIL116w	0.837606
YAL051w	YPL112c				YBL005w	YIL117c	0.107671
YAL051w	YPL147w				YBL005w	YIL119c	0.10981
YAL051w	YPL223c				YBL005w	YIL127c	0.941982
YAL051w	YPL262w				YBL005w	YIL133c	0.29789
YAL051w	YPL263c				YBL005w	YIL169c	0.0336876
YAL051w	YPL265w				YBL005w	YIL172c	0.032928
YAL051w	YPL274w				YBL005w	YIR026c	0.42415
YAL051w	YPR001w				YBL005w	YJL008c	0.465913
YAL051w	YPR128c				YBL005w	YJL012c	0.588477
YAL051w	YPR148c				YBL005w	YJL052w	0.723012
YBL005w	YAL003w				YBL005w	YJL082w	0.803722
YBL005w	YAL005c				YBL005w	YJL083w	0.401128
YBL005w	YAL025c				YBL005w	YJL090c	0.225611
YBL005w	YAL034w-a				YBL005w	YJL163c	0.189623
YBL005w	YAL036c				YBL005w	YJL185c	0.0672784
YBL005w	YAL059w				YBL005w	YJL189w	0.347834
YBL005w	YAL061w				YBL005w	YJL216c	0.211314
YBL005w	YAL065c				YBL005w	YJL219w	0.692299
YBL005w	YAR071w				YBL005w	YJR007w	0.436732
YBL005w	YAR075w				YBL005w	YJR096w	0.0483765
YBL005w	YBL004w				YBL005w	YJR154w	0.385529
YBL005w	YBL005w				YBL005w	YKL007w	0.194788
YBL005w	YBL005w-a				YBL005w	YKL008c	0.131511
YBL005w	YBL006c				YBL005w	YKL012w	0.383191
YBL005w	YBL007c				YBL005w	YKL013c	0.810427
YBL005w	YBL011w				YBL005w	YKL035w	0.435513
YBL005w	YBL028c				YBL005w	YKL051w	0.0231384
YBL005w	YBL029w				YBL005w	YKL056c	0.259383
YBL005w	YBL036c				YBL005w	YKL067w	0.968902
YBL005w	YBL039c				YBL005w	YKL071w	0.466005
YBL005w	YBL041w				YBL005w	YKL077w	0.947171
YBL005w	YBL042c				YBL005w	YKL081w	0.336331
YBL005w	YBL043w				YBL005w	YKL086w	0.0832959
YBL005w	YBL049w				YBL005w	YKL103c	0.757778
YBL005w	YBL054w				YBL005w	YKL129c	0.406254
YBL005w	YBL102w				YBL005w	YKL139w	0.720656
YBL005w	YBL103c				YBL005w	YKL216w	0.779911
YBL005w	YBR008c				YBL005w	YKR092c	0.0060728
YBL005w	YBR034c				YBL005w	YLL028w	0.963156
YBL005w	YBR047w				YBL005w	YLL056c	0.81035
YBL005w	YBR054w				YBL005w	YLL060c	0.443821
YBL005w	YBR072w				YBL005w	YLL061w	0.97016
YBL005w	YBR084w				YBL005w	YLL062c	0.988402
YBL005w	YBR092c				YBL005w	YLR003c	0.897545
YBL005w	YBR093c				YBL005w	YLR009w	0.0589431
YBL005w	YBR126c				YBL005w	YLR042c	0.282956
YBL005w	YBR142w				YBL005w	YLR051c	0.782811
YBL005w	YBR145w				YBL005w	YLR063w	0.98069
YBL005w	YBR147w				YBL005w	YLR073c	0.628169
YBL005w	YBR149w				YBL005w	YLR074c	0.364634
YBL005w	YBR169c				YBL005w	YLR083c	0.198429
YBL005w	YBR177c				YBL005w	YLR099c	0.173171
YBL005w	YBR201w				YBL005w	YLR100w	0.543799
YBL005w	YBR214w				YBL005w	YLR106c	0.507201
YBL005w	YBR244w				YBL005w	YLR120c	0.651572
YBL005w	YBR256c				YBL005w	YLR130c	0.802187
YBL005w	YBR296c				YBL005w	YLR136c	0.890694
YBL005w	YCL026c-a				YBL005w	YLR149c	0.459854
YBL005w	YCL026c-b				YBL005w	YLR152c	0.244678
YBL005w	YCL030c				YBL005w	YLR155c	0.222167
YBL005w	YCL037c				YBL005w	YLR156w	0.254834
YBL005w	YCL040w				YBL005w	YLR172c	0.103304
YBL005w	YCL042w				YBL005w	YLR175w	0.132504
YBL005w	YCL043c				YBL005w	YLR178c	0.109389
YBL005w	YCL054w				YBL005w	YLR180w	0.432491
YBL005w	YCL059c				YBL005w	YLR194c	0.680342
YBL005w	YCR005c				YBL005w	YLR196w	0.211186
YBL005w	YCR010c				YBL005w	YLR197w	0.239032
YBL005w	YCR053w				YBL005w	YLR216c	0.454906
YBL005w	YCR057c				YBL005w	YLR222c	0.383694
YBL005w	YCR061w				YBL005w	YLR249w	0.425687
YBL005w	YCR102c				YBL005w	YLR264w	0.0109385
YBL005w	YDL014w				YBL005w	YLR270w	0.652284
YBL005w	YDL020c				YBL005w	YLR304c	0.0540874
YBL005w	YDL029w				YBL005w	YLR323c	0.655311
YBL005w	YDL108w				YBL005w	YLR327c	0.517536
YBL005w	YDL124w				YBL005w	YLR346c	0.302849
YBL005w	YDL139c				YBL005w	YLR409c	0.0637906
YBL005w	YDL159w-a				YBL005w	YLR413w	0.0280892
YBL005w	YDL222c				YBL005w	YLR437c	0.3088
YBL005w	YDL229w				YBL005w	YLR438w	0.0969826
YBL005w	YDL248w				YBL005w	YLR449w	0.19504
YBL005w	YDR006c				YBL005w	YLR460c	0.273447
YBL005w	YDR009w				YBL005w	YML054c	0.33578
YBL005w	YDR011w				YBL005w	YML056c	0.09513
YBL005w	YDR021w				YBL005w	YML093w	0.328481
YBL005w	YDR025w				YBL005w	YML096w	0.812046
YBL005w	YDR033w				YBL005w	YML097c	0.769962
YBL005w	YDR034w-b				YBL005w	YML100w	0.085586
YBL005w	YDR043c				YBL005w	YML113w	0.694157
YBL005w	YDR054c				YBL005w	YML116w	0.266403
YBL005w	YDR055w				YBL005w	YML123c	0.0270516
YBL005w	YDR062w				YBL005w	YML125c	0.118518
YBL005w	YDR070c				YBL005w	YML128c	0.675628
YBL005w	YDR072c				YBL005w	YML130c	0.943374
YBL005w	YDR073w				YBL005w	YMR006c	0.347422
YBL005w	YDR074w				YBL005w	YMR008c	0.558146
YBL005w	YDR093w				YBL005w	YMR011w	0.770169
YBL005w	YDR165w				YBL005w	YMR020w	0.0319513
YBL005w	YDR171w				YBL005w	YMR040w	0.485864
YBL005w	YDR184c				YBL005w	YMR048w	0.70287
YBL005w	YDR214w				YBL005w	YMR049c	0.0445622
YBL005w	YDR258c				YBL005w	YMR062c	0.88274
YBL005w	YDR297w				YBL005w	YMR090w	0.622525
YBL005w	YDR299w				YBL005w	YMR095c	0.0621129
YBL005w	YDR321w				YBL005w	YMR096w	0.39997
YBL005w	YDR324c				YBL005w	YMR102c	0.742068
YBL005w	YDR345c				YBL005w	YMR105c	0.118937
YBL005w	YDR353w				YBL005w	YMR128w	0.308043
YBL005w	YDR361c				YBL005w	YMR131c	0.0136949
YBL005w	YDR369c				YBL005w	YMR136w	0.780492
YBL005w	YDR380w				YBL005w	YMR165c	0.325041
YBL005w	YDR398w				YBL005w	YMR169c	0.856337
YBL005w	YDR399w				YBL005w	YMR174c	0.219973
YBL005w	YDR404c				YBL005w	YMR193w	0.402195
YBL005w	YDR405w				YBL005w	YMR195w	0.457795
YBL005w	YDR406w				YBL005w	YMR246w	0.380901
YBL005w	YDR415c				YBL005w	YMR250w	0.520137
YBL005w	YDR416w				YBL005w	YMR251w-a	0.178064
YBL005w	YDR418w				YBL005w	YMR258c	0.624413
YBL005w	YDR447c				YBL005w	YMR272c	0.533671
YBL005w	YDR449c				YBL005w	YMR291w	0.702636
YBL005w	YDR450w				YBL005w	YNL035c	0.627577
YBL005w	YDR465c				YBL005w	YNL108c	0.160694
YBL005w	YDR468c				YBL005w	YNL123w	0.429611
YBL005w	YDR469w				YBL005w	YNL134c	0.833203
YBL005w	YDR492w				YBL005w	YNL160w	0.489949
YBL005w	YDR496c				YBL005w	YNL182c	0.770746
YBL005w	YDR516c				YBL005w	YNL202w	0.697554
YBL005w	YDR533c				YBL005w	YNL207w	0.353266
YBL005w	YEL011w				YBL005w	YNL209w	0.481294
YBL005w	YEL020w-a				YBL005w	YNL231c	0.949143
YBL005w	YEL026w				YBL005w	YNL237w	0.78865
YBL005w	YEL039c				YBL005w	YNL248c	0.0289327
YBL005w	YEL046c				YBL005w	YNL258c	0.693452
YBL005w	YEL054c				YBL005w	YNL274c	0.931222
YBL005w	YEL060c				YBL005w	YNL327w	0.254688
YBL005w	YEL071w				YBL005w	YNL331c	0.194742
YBL005w	YER006w				YBL005w	YNR007c	0.391037
YBL005w	YER037w				YBL005w	YNR008w	0.380678
YBL005w	YER042w				YBL005w	YNR012w	0.656636
YBL005w	YER052c				YBL005w	YNR019w	0.384737
YBL005w	YER062c				YBL005w	YNR034w	0.739117
YBL005w	YER067w				YBL005w	YNR044w	0.922022
YBL005w	YER069w				YBL005w	YNR053c	0.477924
YBL005w	YER072w				YBL005w	YNR060w	0.516396
YBL005w	YER103w				YBL005w	YNR067c	0.104474
YBL005w	YER110c				YBL005w	YNR070w	0.699671
YBL005w	YER126c				YBL005w	YNR075w	0.450292
YBL005w	YER130c				YBL005w	YOL001w	0.575865
YBL005w	YER142c				YBL005w	YOL010w	0.0183487
YBL005w	YER143w				YBL005w	YOL016c	0.413189
YBL005w	YER145c				YBL005w	YOL022c	0.437555
YBL005w	YER150w				YBL005w	YOL029c	0.838076
YBL005w	YER175c				YBL005w	YOL030w	0.384285
YBL005w	YER185w				YBL005w	YOL031c	0.935204
YBL005w	YFL014w				YBL005w	YOL052c-a	0.541326
YBL005w	YFL027c				YBL005w	YOL058w	0.984888
YBL005w	YFL056c				YBL005w	YOL077c	0.01553
YBL005w	YFL064c				YBL005w	YOL083w	0.0102524
YBL005w	YFR006w				YBL005w	YOL101c	0.798941
YBL005w	YFR027w				YBL005w	YOL109w	0.263221
YBL005w	YFR053c				YBL005w	YOL123w	0.623226
YBL005w	YGL028c				YBL005w	YOL124c	0.502839
YBL005w	YGL029w				YBL005w	YOL144w	0.72746
YBL005w	YGL030w				YBL005w	YOL151w	0.331237
YBL005w	YGL037c				YBL005w	YOL155c	0.60379
YBL005w	YGL039w				YBL005w	YOL156w	0.464169
YBL005w	YGL055w				YBL005w	YOL158c	0.705963
YBL005w	YGL062w				YBL005w	YOR004w	0.845301
YBL005w	YGL089c				YBL005w	YOR010c	0.627183
YBL005w	YGL111w				YBL005w	YOR014w	0.799609
YBL005w	YGL117w				YBL005w	YOR018w	0.395533
YBL005w	YGL120c				YBL005w	YOR020c	0.0401408
YBL005w	YGL121c				YBL005w	YOR049c	0.195402
YBL005w	YGL141w				YBL005w	YOR052c	0.449789
YBL005w	YGL156w				YBL005w	YOR056c	0.0125881
YBL005w	YGL157w				YBL005w	YOR095c	0.020921
YBL005w	YGL171w				YBL005w	YOR101w	0.0937226
YBL005w	YGL179c				YBL005w	YOR148c	0.115668
YBL005w	YGL209w				YBL005w	YOR151c	0.475971
YBL005w	YGL253w				YBL005w	YOR152c	0.152354
YBL005w	YGL259w				YBL005w	YOR153w	0.852238
YBL005w	YGR008c				YBL005w	YOR173w	0.128983
YBL005w	YGR028w				YBL005w	YOR178c	0.555731
YBL005w	YGR032w				YBL005w	YOR180c	0.169138
YBL005w	YGR035c				YBL005w	YOR183w	0.522046
YBL005w	YGR079w				YBL005w	YOR192c	0.468858
YBL005w	YGR088w				YBL005w	YOR202w	0.0648021
YBL005w	YGR103w				YBL005w	YOR204w	0.42855
YBL005w	YGR110w				YBL005w	YOR206w	0.22222
YBL005w	YGR123c				YBL005w	YOR226c	0.644125
YBL005w	YGR142w				YBL005w	YOR233w	0.965982
YBL005w	YGR145w				YBL005w	YOR252w	0.494271
YBL005w	YGR159c				YBL005w	YOR272w	0.0578565
YBL005w	YGR161c				YBL005w	YOR273c	0.839037
YBL005w	YGR162w				YBL005w	YOR287c	0.579788
YBL005w	YGR197c				YBL005w	YOR289w	0.281425
YBL005w	YGR200c				YBL005w	YOR294w	0.217415
YBL005w	YGR209c				YBL005w	YOR303w	0.464314
YBL005w	YGR214w				YBL005w	YOR310c	0.477702
YBL005w	YGR224w				YBL005w	YOR327c	0.621008
YBL005w	YGR234w				YBL005w	YOR328w	0.564286
YBL005w	YGR243w				YBL005w	YOR340c	0.0389067
YBL005w	YGR245c				YBL005w	YOR341w	0.403587
YBL005w	YGR248w				YBL005w	YOR344c	0.99875
YBL005w	YGR249w				YBL005w	YOR346w	0.475087
YBL005w	YGR271c-a				YBL005w	YOR348c	0.737436
YBL005w	YGR280c				YBL005w	YOR349w	0.549676
YBL005w	YGR281w				YBL005w	YOR374w	0.379416
YBL005w	YGR287c				YBL005w	YOR382w	0.940734
YBL005w	YHL011c				YBL005w	YOR385w	0.422507
YBL005w	YHL021c				YBL005w	YPL004c	0.641769
YBL005w	YHL030w				YBL005w	YPL012w	0.0557434
YBL005w	YHL036w				YBL005w	YPL019c	0.128572
YBL005w	YHR018c				YBL005w	YPL043w	0.0168277
YBL005w	YHR029c				YBL005w	YPL058c	0.276971
YBL005w	YHR044c				YBL005w	YPL061w	0.856285
YBL005w	YHR052w				YBL005w	YPL068c	0.899482
YBL005w	YHR064c				YBL005w	YPL088w	0.181238
YBL005w	YHR066w				YBL005w	YPL093w	0.16162
YBL005w	YHR071w				YBL005w	YPL111w	0.781925
YBL005w	YHR087w				YBL005w	YPL126w	0.100601
YBL005w	YHR088w				YBL005w	YPL135w	0.751102
YBL005w	YHR089c				YBL005w	YPL154c	0.724002
YBL005w	YHR092c				YBL005w	YPL171c	0.895312
YBL005w	YHR104w				YBL005w	YPL207w	0.0714553
YBL005w	YHR128w				YBL005w	YPL211w	0.12688
YBL005w	YHR136c				YBL005w	YPL217c	0.286939
YBL005w	YHR138c				YBL005w	YPL226w	0.388671
YBL005w	YHR140w				YBL005w	YPL240c	0.26
YBL005w	YHR148w				YBL005w	YPL241c	0.143738
YBL005w	YHR162w				YBL005w	YPL250c	0.425147
YBL005w	YHR169w				YBL005w	YPL266w	0.436779
YBL005w	YHR170w				YBL005w	YPL274w	0.588395
YBL005w	YHR197w				YBL005w	YPR010c	0.348414
YBL005w	YHR216w				YBL005w	YPR016c	0.452568
YBL005w	YIL035c				YBL005w	YPR110c	0.333138
YBL005w	YIL045w				YBL005w	YPR112c	0.305556
YBL005w	YIL056w				YBL005w	YPR127w	0.937996
YBL005w	YIL064w				YBL005w	YPR143w	0.897859
YBL005w	YIL091c				YBL005w	YPR144c	0.12622
YBL005w	YIL099w				YBL005w	YPR149w	0.563125
YBL005w	YIL103w				YBL005w	YPR160w	0.714052
YBL005w	YIL113w				YBL005w	YPR163c	0.48809
YBL005w	YIL116w				YBL005w	YPR167c	0.234663
YBL005w	YIL117c				YBL005w	YPR184w	0.53835
YBL005w	YIL119c				YBL005w	YPR190c	0.0811671
YBL005w	YIL127c				YDR216w	YAL018c	0.673006
YBL005w	YIL133c				YDR216w	YAL020c	0.232714
YBL005w	YIL169c				YDR216w	YAL022c	0.22165
YBL005w	YIL172c				YDR216w	YAL040c	0.599476
YBL005w	YIR026c				YDR216w	YAL054c	0.955219
YBL005w	YJL008c				YDR216w	YAL059w	0.337337
YBL005w	YJL012c				YDR216w	YAR035w	0.277392
YBL005w	YJL052w				YDR216w	YAR050w	0.162226
YBL005w	YJL082w				YDR216w	YAR068w	0.519263
YBL005w	YJL083w				YDR216w	YAR071w	0.655116
YBL005w	YJL090c				YDR216w	YAR075w	0.435405
YBL005w	YJL163c				YDR216w	YBL043w	0.621793
YBL005w	YJL185c				YDR216w	YBL051c	0.905339
YBL005w	YJL189w				YDR216w	YBL068w	0.0578611
YBL005w	YJL216c				YDR216w	YBL111c	0.532813
YBL005w	YJL219w				YDR216w	YBR004c	0.420951
YBL005w	YJR007w				YDR216w	YBR005w	0.795291
YBL005w	YJR096w				YDR216w	YBR021w	0.0262569
YBL005w	YJR154w				YDR216w	YBR026c	0.478881
YBL005w	YKL007w				YDR216w	YBR045c	0.624404
YBL005w	YKL008c				YDR216w	YBR046c	0.868161
YBL005w	YKL012w				YDR216w	YBR054w	0.997794
YBL005w	YKL013c				YDR216w	YBR056w	0.448134
YBL005w	YKL035w				YDR216w	YBR067c	0.708388
YBL005w	YKL051w				YDR216w	YBR076w	0.288299
YBL005w	YKL056c				YDR216w	YBR083w	0.755828
YBL005w	YKL067w				YDR216w	YBR093c	0.446495
YBL005w	YKL071w				YDR216w	YBR109c	0.911259
YBL005w	YKL077w				YDR216w	YBR117c	0.987603
YBL005w	YKL081w				YDR216w	YBR126c	0.264653
YBL005w	YKL086w				YDR216w	YBR145w	0.889088
YBL005w	YKL103c				YDR216w	YBR149w	0.994213
YBL005w	YKL129c				YDR216w	YBR159w	0.556501
YBL005w	YKL139w				YDR216w	YBR183w	0.433266
YBL005w	YKL216w				YDR216w	YBR200w	0.803952
YBL005w	YKR092c				YDR216w	YBR214w	0.358853
YBL005w	YLL028w				YDR216w	YBR222c	0.175719
YBL005w	YLL056c				YDR216w	YBR223c	0.736046
YBL005w	YLL060c				YDR216w	YBR227c	0.99142
YBL005w	YLL061w				YDR216w	YBR228w	0.20878
YBL005w	YLL062c				YDR216w	YBR242w	0.445783
YBL005w	YLR003c				YDR216w	YBR256c	0.786345
YBL005w	YLR009w				YDR216w	YBR257w	0.772703
YBL005w	YLR042c				YDR216w	YBR291c	0.26623
YBL005w	YLR051c				YDR216w	YBR294w	0.991954
YBL005w	YLR063w				YDR216w	YCL042w	0.835127
YBL005w	YLR073c				YDR216w	YCL054w	0.0559295
YBL005w	YLR074c				YDR216w	YCL059c	0.230595
YBL005w	YLR083c				YDR216w	YCL064c	0.0695846
YBL005w	YLR099c				YDR216w	YCR004c	0.870519
YBL005w	YLR100w				YDR216w	YCR010c	0.35717
YBL005w	YLR106c				YDR216w	YCR021c	0.0352501
YBL005w	YLR120c				YDR216w	YCR057c	0.00350656
YBL005w	YLR130c				YDR216w	YCR068w	0.218808
YBL005w	YLR136c				YDR216w	YCR079w	0.549045
YBL005w	YLR149c				YDR216w	YDL010w	0.1525
YBL005w	YLR152c				YDR216w	YDL017w	0.0477452
YBL005w	YLR155c				YDR216w	YDL018c	0.442032
YBL005w	YLR156w				YDR216w	YDL021w	0.215061
YBL005w	YLR172c				YDR216w	YDL024c	0.492544
YBL005w	YLR175w				YDR216w	YDL038c	0.796246
YBL005w	YLR178c				YDR216w	YDL060w	0.00667382
YBL005w	YLR180w				YDR216w	YDL073w	0.494072
YBL005w	YLR194c				YDR216w	YDL074c	0.59969
YBL005w	YLR196w				YDR216w	YDL078c	0.803403
YBL005w	YLR197w				YDR216w	YDL091c	0.31462
YBL005w	YLR216c				YDR216w	YDL107w	0.14215
YBL005w	YLR222c				YDR216w	YDL110c	0.453147
YBL005w	YLR249w				YDR216w	YDL117w	0.486437
YBL005w	YLR264w				YDR216w	YDL119c	0.424296
YBL005w	YLR270w				YDR216w	YDL134c	0.452775
YBL005w	YLR304c				YDR216w	YDL142c	0.141393
YBL005w	YLR323c				YDR216w	YDL145c	0.420664
YBL005w	YLR327c				YDR216w	YDL156w	0.649403
YBL005w	YLR346c				YDR216w	YDL159w	0.717636
YBL005w	YLR409c				YDR216w	YDL160c	0.223893
YBL005w	YLR413w				YDR216w	YDL161w	0.868247
YBL005w	YLR437c				YDR216w	YDL170w	0.00960438
YBL005w	YLR438w				YDR216w	YDL220c	0.60481
YBL005w	YLR449w				YDR216w	YDL223c	0.965165
YBL005w	YLR460c				YDR216w	YDL240w	0.528928
YBL005w	YML054c				YDR216w	YDR034w-b	0.138727
YBL005w	YML056c				YDR216w	YDR043c	0.256883
YBL005w	YML093w				YDR216w	YDR059c	0.534879
YBL005w	YML096w				YDR216w	YDR070c	0.765213
YBL005w	YML097c				YDR216w	YDR071c	0.845512
YBL005w	YML100w				YDR216w	YDR075w	0.454435
YBL005w	YML113w				YDR216w	YDR077w	0.879894
YBL005w	YML116w				YDR216w	YDR083w	0.166911
YBL005w	YML123c				YDR216w	YDR084c	0.274247
YBL005w	YML125c				YDR216w	YDR089w	0.383085
YBL005w	YML128c				YDR216w	YDR101c	0.0326355
YBL005w	YML130c				YDR216w	YDR110w	0.350134
YBL005w	YMR006c				YDR216w	YDR111c	0.614785
YBL005w	YMR008c				YDR216w	YDR120c	0.29497
YBL005w	YMR011w				YDR216w	YDR171w	0.296539
YBL005w	YMR020w				YDR216w	YDR182w	0.524878
YBL005w	YMR040w				YDR216w	YDR183w	0.374066
YBL005w	YMR048w				YDR216w	YDR216w	0.929211
YBL005w	YMR049c				YDR216w	YDR218c	0.489998
YBL005w	YMR062c				YDR216w	YDR244w	0.977177
YBL005w	YMR090w				YDR216w	YDR256c	0.281406
YBL005w	YMR095c				YDR216w	YDR258c	0.35357
YBL005w	YMR096w				YDR216w	YDR259c	0.854043
YBL005w	YMR102c				YDR216w	YDR262w	0.538054
YBL005w	YMR105c				YDR216w	YDR267c	0.492059
YBL005w	YMR128w				YDR216w	YDR294c	0.511361
YBL005w	YMR131c				YDR216w	YDR309c	0.178055
YBL005w	YMR136w				YDR216w	YDR315c	0.384578
YBL005w	YMR165c				YDR216w	YDR361c	0.915605
YBL005w	YMR169c				YDR216w	YDR380w	0.194028
YBL005w	YMR174c				YDR216w	YDR384c	0.26943
YBL005w	YMR193w				YDR216w	YDR399w	0.838285
YBL005w	YMR195w				YDR216w	YDR432w	0.318006
YBL005w	YMR246w				YDR216w	YDR443c	0.540325
YBL005w	YMR250w				YDR216w	YDR449c	0.661756
YBL005w	YMR251w-a				YDR216w	YDR516c	0.571531
YBL005w	YMR258c				YDR216w	YEL011w	0.322558
YBL005w	YMR272c				YDR216w	YEL017c-a	0.566388
YBL005w	YMR291w				YDR216w	YEL024w	0.162487
YBL005w	YNL035c				YDR216w	YEL035c	0.549652
YBL005w	YNL108c				YDR216w	YEL041w	0.393478
YBL005w	YNL123w				YDR216w	YEL076c	0.530491
YBL005w	YNL134c				YDR216w	YEL076c-a	0.546986
YBL005w	YNL160w				YDR216w	YER011w	0.797387
YBL005w	YNL182c				YDR216w	YER015w	0.949324
YBL005w	YNL202w				YDR216w	YER037w	0.594509
YBL005w	YNL207w				YDR216w	YER054c	0.0660415
YBL005w	YNL209w				YDR216w	YER067w	0.188617
YBL005w	YNL231c				YDR216w	YER072w	0.463439
YBL005w	YNL237w				YDR216w	YER073w	0.351766
YBL005w	YNL248c				YDR216w	YER085c	0.738443
YBL005w	YNL258c				YDR216w	YER115c	0.853822
YBL005w	YNL274c				YDR216w	YER126c	0.0185592
YBL005w	YNL327w				YDR216w	YER133w	0.49817
YBL005w	YNL331c				YDR216w	YER142c	0.418281
YBL005w	YNR007c				YDR216w	YER150w	0.353489
YBL005w	YNR008w				YDR216w	YER179w	0.568404
YBL005w	YNR012w				YDR216w	YFL014w	0.634662
YBL005w	YNR019w				YDR216w	YFL054c	0.710037
YBL005w	YNR034w				YDR216w	YFL067w	0.4672
YBL005w	YNR044w				YDR216w	YFR007w	0.637484
YBL005w	YNR053c				YDR216w	YFR015c	0.605411
YBL005w	YNR060w				YDR216w	YFR017c	0.588715
YBL005w	YNR067c				YDR216w	YFR034c	0.363533
YBL005w	YNR070w				YDR216w	YFR044c	0.34655
YBL005w	YNR075w				YDR216w	YFR045w	0.621509
YBL005w	YOL001w				YDR216w	YFR053c	0.663184
YBL005w	YOL010w				YDR216w	YGL009c	0.0319361
YBL005w	YOL016c				YDR216w	YGL013c	0.730152
YBL005w	YOL022c				YDR216w	YGL037c	0.0607951
YBL005w	YOL029c				YDR216w	YGL055w	0.543045
YBL005w	YOL030w				YDR216w	YGL078c	0.136668
YBL005w	YOL031c				YDR216w	YGL081w	0.650571
YBL005w	YOL052c-a				YDR216w	YGL116w	0.000176973
YBL005w	YOL058w				YDR216w	YGL145w	0.410213
YBL005w	YOL077c				YDR216w	YGL205w	0.775123
YBL005w	YOL083w				YDR216w	YGL207w	0.829876
YBL005w	YOL101c				YDR216w	YGL225w	0.428091
YBL005w	YOL109w				YDR216w	YGL246c	0.360607
YBL005w	YOL123w				YDR216w	YGR008c	0.207461
YBL005w	YOL124c				YDR216w	YGR035c	0.418934
YBL005w	YOL144w				YDR216w	YGR041w	0.225671
YBL005w	YOL151w				YDR216w	YGR043c	0.445848
YBL005w	YOL155c				YDR216w	YGR067c	0.406615
YBL005w	YOL156w				YDR216w	YGR079w	0.642385
YBL005w	YOL158c				YDR216w	YGR098c	0.385964
YBL005w	YOR004w				YDR216w	YGR099w	0.12374
YBL005w	YOR010c				YDR216w	YGR123c	0.370601
YBL005w	YOR014w				YDR216w	YGR142w	0.439631
YBL005w	YOR018w				YDR216w	YGR145w	0.369276
YBL005w	YOR020c				YDR216w	YGR177c	0.598444
YBL005w	YOR049c				YDR216w	YGR188c	0.311567
YBL005w	YOR052c				YDR216w	YGR205w	0.207397
YBL005w	YOR056c				YDR216w	YGR230w	0.185061
YBL005w	YOR095c				YDR216w	YGR236c	0.101764
YBL005w	YOR101w				YDR216w	YGR244c	0.58201
YBL005w	YOR148c				YDR216w	YGR245c	0.132047
YBL005w	YOR151c				YDR216w	YGR248w	0.361027
YBL005w	YOR152c				YDR216w	YGR256w	0.403895
YBL005w	YOR153w				YDR216w	YGR280c	0.232895
YBL005w	YOR173w				YDR216w	YHL021c	0.560574
YBL005w	YOR178c				YDR216w	YHL032c	0.335543
YBL005w	YOR180c				YDR216w	YHL036w	0.0834323
YBL005w	YOR183w				YDR216w	YHR018c	0.805001
YBL005w	YOR192c				YDR216w	YHR028c	0.240389
YBL005w	YOR202w				YDR216w	YHR029c	0.709543
YBL005w	YOR204w				YDR216w	YHR049w	0.623803
YBL005w	YOR206w				YDR216w	YHR052w	0.240836
YBL005w	YOR226c				YDR216w	YHR071w	0.355019
YBL005w	YOR233w				YDR216w	YHR086w	0.588741
YBL005w	YOR252w				YDR216w	YHR087w	0.0757552
YBL005w	YOR272w				YDR216w	YHR097c	0.329257
YBL005w	YOR273c				YDR216w	YHR136c	0.164093
YBL005w	YOR287c				YDR216w	YHR137w	0.947771
YBL005w	YOR289w				YDR216w	YHR138c	0.110026
YBL005w	YOR294w				YDR216w	YHR140w	0.0965923
YBL005w	YOR303w				YDR216w	YHR155w	0.599272
YBL005w	YOR310c				YDR216w	YHR170w	0.141532
YBL005w	YOR327c				YDR216w	YHR176w	0.630813
YBL005w	YOR328w				YDR216w	YHR208w	0.745718
YBL005w	YOR340c				YDR216w	YHR216w	0.598523
YBL005w	YOR341w				YDR216w	YIL009w	0.428327
YBL005w	YOR344c				YDR216w	YIL057c	0.157415
YBL005w	YOR346w				YDR216w	YIL060w	0.436496
YBL005w	YOR348c				YDR216w	YIL066c	0.758817
YBL005w	YOR349w				YDR216w	YIL107c	0.3255
YBL005w	YOR374w				YDR216w	YIL120w	0.00948874
YBL005w	YOR382w				YDR216w	YIL136w	0.182463
YBL005w	YOR385w				YDR216w	YIL146c	0.00371978
YBL005w	YPL004c				YDR216w	YIL153w	0.135382
YBL005w	YPL012w				YDR216w	YIL155c	0.690879
YBL005w	YPL019c				YDR216w	YIL160c	0.579269
YBL005w	YPL043w				YDR216w	YIL169c	0.0336876
YBL005w	YPL058c				YDR216w	YIR015w	0.378663
YBL005w	YPL061w				YDR216w	YIR016w	0.787988
YBL005w	YPL068c				YDR216w	YIR032c	0.585237
YBL005w	YPL088w				YDR216w	YIR034c	0.0704993
YBL005w	YPL093w				YDR216w	YJL023c	0.794497
YBL005w	YPL111w				YDR216w	YJL043w	0.531262
YBL005w	YPL126w				YDR216w	YJL048c	0.505517
YBL005w	YPL135w				YDR216w	YJL057c	0.436539
YBL005w	YPL154c				YDR216w	YJL107c	0.385003
YBL005w	YPL171c				YDR216w	YJL122w	0.317283
YBL005w	YPL207w				YDR216w	YJL131c	0.0777046
YBL005w	YPL211w				YDR216w	YJL163c	0.189623
YBL005w	YPL217c				YDR216w	YJL172w	0.175835
YBL005w	YPL226w				YDR216w	YJL196c	0.504084
YBL005w	YPL240c				YDR216w	YJL198w	0.034574
YBL005w	YPL241c				YDR216w	YJL203w	0.230913
YBL005w	YPL250c				YDR216w	YJL204c	0.703639
YBL005w	YPL266w				YDR216w	YJL210w	0.746319
YBL005w	YPL274w				YDR216w	YJL217w	0.780355
YBL005w	YPR010c				YDR216w	YJR019c	0.186306
YBL005w	YPR016c				YDR216w	YJR094c	0.73904
YBL005w	YPR110c				YDR216w	YJR132w	0.180027
YBL005w	YPR112c				YDR216w	YJR140c	0.00216553
YBL005w	YPR127w				YDR216w	YJR141w	0.462226
YBL005w	YPR143w				YDR216w	YKL015w	0.249733
YBL005w	YPR144c				YDR216w	YKL016c	0.843617
YBL005w	YPR149w				YDR216w	YKL035w	0.435513
YBL005w	YPR160w				YDR216w	YKL071w	0.466005
YBL005w	YPR163c				YDR216w	YKL086w	0.0832959
YBL005w	YPR167c				YDR216w	YKL120w	0.941056
YBL005w	YPR184w				YDR216w	YKL149c	0.744973
YBL005w	YPR190c				YDR216w	YKL157w	0.786404
YBL008w	YAL001c				YDR216w	YKL163w	0.578319
YBL008w	YAR002w				YDR216w	YKL164c	0.478192
YBL008w	YBL029w				YDR216w	YKL187c	0.467895
YBL008w	YBR009c				YDR216w	YKL188c	0.489791
YBL008w	YBR010w				YDR216w	YKL197c	0.186087
YBL008w	YBR095c				YDR216w	YKL216w	0.779911
YBL008w	YBR096w				YDR216w	YKL217w	0.0428776
YBL008w	YBR097w				YDR216w	YKR009c	0.339418
YBL008w	YBR163w				YDR216w	YKR024c	0.565147
YBL008w	YDL001w				YDR216w	YKR067w	0.243593
YBL008w	YDR086c				YDR216w	YKR075c	0.82242
YBL008w	YDR125c				YDR216w	YKR080w	0.756701
YBL008w	YDR224c				YDR216w	YKR093w	0.380405
YBL008w	YDR225w				YDR216w	YLL011w	0.459954
YBL008w	YDR292c				YDR216w	YLR009w	0.0589431
YBL008w	YDR418w				YDR216w	YLR044c	0.566208
YBL008w	YDR523c				YDR216w	YLR064w	0.340635
YBL008w	YEL001c				YDR216w	YLR126c	0.811613
YBL008w	YEL002c				YDR216w	YLR134w	0.404558
YBL008w	YEL022w				YDR216w	YLR149c	0.459854
YBL008w	YEL023c				YDR216w	YLR151c	0.031893
YBL008w	YFR001w				YDR216w	YLR155c	0.222167
YBL008w	YGL164c				YDR216w	YLR163c	0.695539
YBL008w	YGR003w				YDR216w	YLR178c	0.109389
YBL008w	YGR026w				YDR216w	YLR216c	0.454906
YBL008w	YGR059w				YDR216w	YLR220w	0.0842147
YBL008w	YGR187c				YDR216w	YLR222c	0.383694
YBL008w	YHR138c				YDR216w	YLR249w	0.425687
YBL008w	YHR140w				YDR216w	YLR258w	0.519294
YBL008w	YHR155w				YDR216w	YLR266c	0.393102
YBL008w	YJL012c				YDR216w	YLR270w	0.652284
YBL008w	YJR006w				YDR216w	YLR284c	0.0849462
YBL008w	YJR007w				YDR216w	YLR299w	0.11092
YBL008w	YJR044c				YDR216w	YLR324w	0.626738
YBL008w	YKL078w				YDR216w	YLR327c	0.517536
YBL008w	YKL203c				YDR216w	YLR330w	0.687184
YBL008w	YKR010c				YDR216w	YLR348c	0.883115
YBL008w	YKR026c				YDR216w	YLR356w	0.897505
YBL008w	YLL001w				YDR216w	YLR432w	0.173029
YBL008w	YLR002c				YDR216w	YLR438w	0.0969826
YBL008w	YLR060w				YDR216w	YML049c	0.48854
YBL008w	YLR061w				YDR216w	YML052w	0.0960117
YBL008w	YLR166c				YDR216w	YML054c	0.33578
YBL008w	YLR225c				YDR216w	YML056c	0.09513
YBL008w	YMR259c				YDR216w	YML058w	0.300812
YBL008w	YNL031c				YDR216w	YML074c	0.343784
YBL008w	YNL048w				YDR216w	YML075c	0.430005
YBL008w	YNL241c				YDR216w	YML100w	0.085586
YBL008w	YOL105c				YDR216w	YML123c	0.0270516
YBL008w	YOL144w				YDR216w	YML128c	0.675628
YBL008w	YOL145c				YDR216w	YML131w	0.423902
YBL008w	YOR003w				YDR216w	YMR011w	0.770169
YBL008w	YOR137c				YDR216w	YMR015c	0.39717
YBL008w	YOR273c				YDR216w	YMR017w	0.359034
YBL008w	YOR274w				YDR216w	YMR018w	0.0201667
YBL008w	YOR296w				YDR216w	YMR104c	0.786858
YBL008w	YOR303w				YDR216w	YMR105c	0.118937
YBL008w	YPL018w				YDR216w	YMR107w	0.223977
YBL008w	YPL019c				YDR216w	YMR165c	0.325041
YBL008w	YPL097w				YDR216w	YMR169c	0.856337
YBL008w	YPL249c-a				YDR216w	YMR189w	0.931296
YBL008w	YPL253c				YDR216w	YMR195w	0.457795
YBL008w	YPR135w				YDR216w	YMR196w	0.480834
YBL008w	YPR144c				YDR216w	YMR225c	0.692359
YBL021c	YAL062w				YDR216w	YMR229c	0.486398
YBL021c	YBL001c				YDR216w	YMR251w-a	0.178064
YBL021c	YBL030c				YDR216w	YMR266w	0.0469715
YBL021c	YBL044w				YDR216w	YMR269w	0.0782268
YBL021c	YBL045c				YDR216w	YMR303c	0.802315
YBL021c	YBL099w				YDR216w	YMR304w	0.992397
YBL021c	YBR014c				YDR216w	YMR313c	0.985
YBL021c	YBR025c				YDR216w	YMR323w	0.59519
YBL021c	YBR038w				YDR216w	YNL009w	0.772316
YBL021c	YBR039w				YDR216w	YNL012w	0.349424
YBL021c	YBR167c				YDR216w	YNL036w	0.241261
YBL021c	YBR168w				YDR216w	YNL061w	0.0888945
YBL021c	YBR216c				YDR216w	YNL078w	0.698208
YBL021c	YBR217w				YDR216w	YNL087w	0.621274
YBL021c	YBR243c				YDR216w	YNL100w	0.765729
YBL021c	YBR244w				YDR216w	YNL122c	0.33868
YBL021c	YBR275c				YDR216w	YNL124w	0.205113
YBL021c	YCR028c				YDR216w	YNL130c	0.476093
YBL021c	YCR105w				YDR216w	YNL141w	0.351654
YBL021c	YDL066w				YDR216w	YNL182c	0.770746
YBL021c	YDL067c				YDR216w	YNL186w	0.992553
YBL021c	YDL149w				YDR216w	YNL194c	0.00818158
YBL021c	YDL170w				YDR216w	YNL196c	0.410082
YBL021c	YDL171c				YDR216w	YNL202w	0.697554
YBL021c	YDL174c				YDR216w	YNL237w	0.78865
YBL021c	YDL181w				YDR216w	YNL239w	0.57568
YBL021c	YDL205c				YDR216w	YNL241c	0.677389
YBL021c	YDL230w				YDR216w	YNL270c	0.79292
YBL021c	YDR030c				YDR216w	YNL305c	0.839141
YBL021c	YDR031w				YDR216w	YNL309w	0.109241
YBL021c	YDR042c				YDR216w	YNR006w	0.215128
YBL021c	YDR146c				YDR216w	YNR028w	0.355002
YBL021c	YDR148c				YDR216w	YNR046w	0.0136976
YBL021c	YDR178w				YDR216w	YNR050c	0.470893
YBL021c	YDR183w				YDR216w	YNR056c	0.252031
YBL021c	YDR232w				YDR216w	YNR064c	0.287662
YBL021c	YDR282c				YDR216w	YNR072w	0.470733
YBL021c	YDR292c				YDR216w	YOL019w	0.247985
YBL021c	YDR298c				YDR216w	YOL052c-a	0.541326
YBL021c	YDR299w				YDR216w	YOL086c	0.508641
YBL021c	YDR372c				YDR216w	YOL115w	0.654395
YBL021c	YDR373w				YDR216w	YOL124c	0.502839
YBL021c	YDR376w				YDR216w	YOL147c	0.518405
YBL021c	YDR377w				YDR216w	YOL155c	0.60379
YBL021c	YDR453c				YDR216w	YOR017w	0.341908
YBL021c	YDR473c				YDR216w	YOR027w	0.717261
YBL021c	YDR495c				YDR216w	YOR032c	0.291756
YBL021c	YDR522c				YDR216w	YOR040w	0.93954
YBL021c	YDR529c				YDR216w	YOR056c	0.0125881
YBL021c	YEL024w				YDR216w	YOR057w	0.0654479
YBL021c	YEL025c				YDR216w	YOR084w	0.480047
YBL021c	YER048w-a				YDR216w	YOR100c	0.328246
YBL021c	YER100w				YDR216w	YOR108w	0.152406
YBL021c	YER174c				YDR216w	YOR134w	0.236999
YBL021c	YER175c				YDR216w	YOR142w	0.531185
YBL021c	YER176w				YDR216w	YOR161c	0.479828
YBL021c	YFL018c				YDR216w	YOR178c	0.555731
YBL021c	YFR022w				YDR216w	YOR180c	0.169138
YBL021c	YFR023w				YDR216w	YOR206w	0.22222
YBL021c	YGL001c				YDR216w	YOR220w	0.02365
YBL021c	YGL079w				YDR216w	YOR245c	0.49148
YBL021c	YGL133w				YDR216w	YOR273c	0.839037
YBL021c	YGL134w				YDR216w	YOR294w	0.217415
YBL021c	YGL159w				YDR216w	YOR302w	0.661249
YBL021c	YGL187c				YDR216w	YOR313c	0.466338
YBL021c	YGL191w				YDR216w	YOR317w	0.739198
YBL021c	YGL195w				YDR216w	YOR340c	0.0389067
YBL021c	YGL196w				YDR216w	YOR341w	0.403587
YBL021c	YGR059w				YDR216w	YOR348c	0.737436
YBL021c	YGR183c				YDR216w	YOR363c	0.429513
YBL021c	YGR187c				YDR216w	YOR368w	0.556597
YBL021c	YGR234w				YDR216w	YOR374w	0.379416
YBL021c	YHR001w				YDR216w	YOR378w	0.55347
YBL021c	YHR001w-a				YDR216w	YOR388c	0.677746
YBL021c	YHR008c				YDR216w	YOR389w	0.938868
YBL021c	YHR044c				YDR216w	YPL018w	0.278921
YBL021c	YHR050w				YDR216w	YPL019c	0.128572
YBL021c	YHR050w-a				YDR216w	YPL020c	0.0942412
YBL021c	YHR051w				YDR216w	YPL033c	0.350794
YBL021c	YHR190w				YDR216w	YPL036w	0.898335
YBL021c	YHR193c				YDR216w	YPL043w	0.0168277
YBL021c	YHR194w				YDR216w	YPL051w	0.629585
YBL021c	YIL003w				YDR216w	YPL061w	0.856285
YBL021c	YIL125w				YDR216w	YPL092w	0.176619
YBL021c	YIL155c				YDR216w	YPL113c	0.494291
YBL021c	YJL060w				YDR216w	YPL123c	0.119349
YBL021c	YJL061w				YDR216w	YPL135w	0.751102
YBL021c	YJL145w				YDR216w	YPL147w	0.502837
YBL021c	YJL146w				YDR216w	YPL148c	0.44955
YBL021c	YJL148w				YDR216w	YPL164c	0.0371418
YBL021c	YJL166w				YDR216w	YPL187w	0.343237
YBL021c	YJL207c				YDR216w	YPL200w	0.0414892
YBL021c	YJR048w				YDR216w	YPL201c	0.113711
YBL021c	YJR077c				YDR216w	YPL216w	0.192976
YBL021c	YJR078w				YDR216w	YPL230w	0.251622
YBL021c	YJR079w				YDR216w	YPL249c-a	0.641401
YBL021c	YJR082c				YDR216w	YPL250c	0.425147
YBL021c	YJR100c				YDR216w	YPL253c	0.156642
YBL021c	YJR121w				YDR216w	YPL265w	0.370337
YBL021c	YKL015w				YDR216w	YPR001w	0.130723
YBL021c	YKL016c				YDR216w	YPR002w	0.82713
YBL021c	YKL040c				YDR216w	YPR006c	0.215833
YBL021c	YKL072w				YDR216w	YPR010c	0.348414
YBL021c	YKL073w				YDR216w	YPR118w	0.327176
YBL021c	YKL078w				YDR216w	YPR133w-a	0.539007
YBL021c	YKL141w				YDR216w	YPR149w	0.563125
YBL021c	YKL148c				YDR216w	YPR151c	0.207578
YBL021c	YKL217w				YDR216w	YPR152c	0.229875
YBL021c	YKL220c				YDR216w	YPR160w	0.714052
YBL021c	YLL026w				YGL166w	YBR011c	0.505133
YBL021c	YLL027w				YGL166w	YBR286w	0.997841
YBL021c	YLL028w				YGL166w	YCR005c	0.106191
YBL021c	YLL034c				YGL166w	YEL071w	0.551781
YBL021c	YLL039c				YGL166w	YER024w	0.291817
YBL021c	YLR038c				YGL166w	YGL156w	0.244547
YBL021c	YLR168c				YGL166w	YGL166w	0.376375
YBL021c	YLR219w				YGL166w	YGR282c	0.790866
YBL021c	YLR220w				YGL166w	YHR053c	0.561366
YBL021c	YLR238w				YGL166w	YIL117c	0.107671
YBL021c	YLR295c				YGL166w	YJR104c	0.229182
YBL021c	YLR304c				YGL166w	YLR080w	0.0246533
YBL021c	YLR395c				YGL166w	YLR155c	0.222167
YBL021c	YML007w				YGL166w	YMR229c	0.486398
YBL021c	YML054c				YGL166w	YNL146w	0.434285
YBL021c	YML088w				YGL166w	YNR064c	0.287662
YBL021c	YML091c				YGL166w	YNR066c	0.464953
YBL021c	YML119w				YGL166w	YNR068c	0.0758428
YBL021c	YML120c				YGL166w	YOL154w	0.492758
YBL021c	YMR064w				YGL166w	YOR031w	0.0199466
YBL021c	YMR065w				YGL166w	YOR220w	0.02365
YBL021c	YMR126c				YGL166w	YPR061c	0.419887
YBL021c	YMR133w				YGL181w	YAL064c-a	0.37914
YBL021c	YMR194w				YGL181w	YAL065c	0.557277
YBL021c	YMR211w				YGL181w	YAL067c	0.704488
YBL021c	YMR256c				YGL181w	YAL068c	0.566381
YBL021c	YMR258c				YGL181w	YBR098w	0.243703
YBL021c	YMR280c				YGL181w	YBR126c	0.264653
YBL021c	YNL009w				YGL181w	YBR273c	0.159724
YBL021c	YNL010w				YGL181w	YDL092w	0.805228
YBL021c	YNL037c				YGL181w	YDL098c	0.35458
YBL021c	YNL052w				YGL181w	YDL102w	0.568807
YBL021c	YNR001c				YGL181w	YDL180w	0.468481
YBL021c	YNR004w				YGL181w	YDR222w	0.929378
YBL021c	YNR054c				YGL181w	YDR223w	0.325132
YBL021c	YOL024w				YGL181w	YDR282c	0.448989
YBL021c	YOL091w				YGL181w	YDR284c	0.219624
YBL021c	YOL105c				YGL181w	YEL018w	0.267328
YBL021c	YOR064c				YGL181w	YEL019c	0.543965
YBL021c	YOR065w				YGL181w	YEL072w	0.155682
YBL021c	YOR111w				YGL181w	YEL073c	0.128178
YBL021c	YOR136w				YGL181w	YER163c	0.0237917
YBL021c	YOR154w				YGL181w	YER165w	0.530979
YBL021c	YOR257w				YGL181w	YFL011w	0.503402
YBL021c	YOR268c				YGL181w	YFL012w	0.657143
YBL021c	YOR269w				YGL181w	YFL053w	0.723934
YBL021c	YOR375c				YGL181w	YFR039c	0.839134
YBL021c	YPL018w				YGL181w	YFR040w	0.44347
YBL021c	YPL019c				YGL181w	YGL242c	0.441128
YBL021c	YPL207w				YGL181w	YGL246c	0.360607
YBL021c	YPL208w				YGL181w	YGR016w	0.0949864
YBL021c	YPL270w				YGL181w	YGR027c	0.280324
YBL021c	YPL271w				YGL181w	YGR043c	0.445848
YBL021c	YPR020w				YGL181w	YGR125w	0.69491
YBL021c	YPR145w				YGL181w	YGR127w	0.172706
YBL021c	YPR190c				YGL181w	YHR134w	0.66258
YBL021c	YPR191w				YGL181w	YIL162w	0.0359066
YBL021c	YPR198w				YGL181w	YKL004w	0.0711039
YBL103c	YAL029c				YGL181w	YKL005c	0.830654
YBL103c	YAL061w				YGL181w	YKL220c	0.051293
YBL103c	YAL062w				YGL181w	YKL221w	0.239932
YBL103c	YBL042c				YGL181w	YLL026w	0.426942
YBL103c	YBL043w				YGL181w	YLR258w	0.519294
YBL103c	YBL079w				YGL181w	YLR429w	0.477168
YBL103c	YBR104w				YGL181w	YLR430w	0.498013
YBL103c	YBR163w				YGL181w	YMR246w	0.380901
YBL103c	YBR167c				YGL181w	YMR259c	0.779924
YBL103c	YBR247c				YGL181w	YNL167c	0.343123
YBL103c	YCL025c				YGL181w	YNR072w	0.470733
YBL103c	YCR005c				YGL181w	YOL041c	0.00258535
YBL103c	YCR019w				YGL181w	YOL082w	0.893814
YBL103c	YCR020c-a				YGL181w	YOL083w	0.0102524
YBL103c	YCR020w-b				YGL181w	YOL088c	0.307861
YBL103c	YCR021c				YGL181w	YOL128c	0.338239
YBL103c	YCR090c				YGL181w	YOL130w	0.175278
YBL103c	YCR095c				YGL181w	YOR296w	0.673644
YBL103c	YCR096c				YGL181w	YPR047w	0.689328
YBL103c	YCR097w				YGL181w	YPR049c	0.466197
YBL103c	YCR105w				YGL181w	YPR051w	0.122013
YBL103c	YCR107w				YGL181w	YPR160w	0.714052
YBL103c	YDL001w				YHR178w	YAL003w	0.539532
YBL103c	YDL013w				YHR178w	YAL025c	0.242948
YBL103c	YDL018c				YHR178w	YAL059w	0.337337
YBL103c	YDL044c				YHR178w	YAL064w	0.811252
YBL103c	YDL066w				YHR178w	YAL065c	0.557277
YBL103c	YDL067c				YHR178w	YAR073w	0.525493
YBL103c	YDL110c				YHR178w	YBL028c	0.8752
YBL103c	YDL176w				YHR178w	YBL039c	0.171988
YBL103c	YDL182w				YHR178w	YBR021w	0.0262569
YBL103c	YDR041w				YHR178w	YBR034c	0.152676
YBL103c	YDR042c				YHR178w	YBR054w	0.997794
YBL103c	YDR043c				YHR178w	YBR068c	0.842744
YBL103c	YDR067c				YHR178w	YBR137w	0.307073
YBL103c	YDR068w				YHR178w	YBR142w	0.241125
YBL103c	YDR077w				YHR178w	YBR196c	0.154049
YBL103c	YDR078c				YHR178w	YBR210w	0.0449466
YBL103c	YDR079w				YHR178w	YBR267w	0.197625
YBL103c	YDR084c				YHR178w	YBR279w	0.978766
YBL103c	YDR127w				YHR178w	YCL040w	0.946343
YBL103c	YDR131c				YHR178w	YCL042w	0.835127
YBL103c	YDR146c				YHR178w	YCL043c	0.145585
YBL103c	YDR171w				YHR178w	YCL054w	0.0559295
YBL103c	YDR179c				YHR178w	YCL064c	0.0695846
YBL103c	YDR179w-a				YHR178w	YCL066w	0.406291
YBL103c	YDR279w				YHR178w	YCR047c	0.112102
YBL103c	YDR314c				YHR178w	YCR057c	0.00350656
YBL103c	YDR317w				YHR178w	YCR072c	0.335371
YBL103c	YDR385w				YHR178w	YCR098c	0.642424
YBL103c	YDR406w				YHR178w	YCR101c	0.454996
YBL103c	YDR457w				YHR178w	YDL021w	0.215061
YBL103c	YDR473c				YHR178w	YDL022w	0.652656
YBL103c	YDR482c				YHR178w	YDL031w	0.0401757
YBL103c	YDR483w				YHR178w	YDL049c	0.0610626
YBL103c	YDR494w				YHR178w	YDL063c	0.0101653
YBL103c	YDR508c				YHR178w	YDL079c	0.515783
YBL103c	YDR510w				YHR178w	YDL085w	0.701007
YBL103c	YDR519w				YHR178w	YDL148c	0.0952456
YBL103c	YDR522c				YHR178w	YDL159w	0.717636
YBL103c	YDR534c				YHR178w	YDL160c	0.223893
YBL103c	YEL050c				YHR178w	YDL174c	0.746124
YBL103c	YEL071w				YHR178w	YDL193w	0.486291
YBL103c	YEL072w				YHR178w	YDL210w	0.319041
YBL103c	YER001w				YHR178w	YDL235c	0.417873
YBL103c	YER002w				YHR178w	YDR026c	0.864416
YBL103c	YER013w				YHR178w	YDR033w	0.0479402
YBL103c	YER044c-a				YHR178w	YDR038c	0.657199
YBL103c	YER069w				YHR178w	YDR061w	0.782723
YBL103c	YER110c				YHR178w	YDR077w	0.879894
YBL103c	YER126c				YHR178w	YDR083w	0.166911
YBL103c	YER128w				YHR178w	YDR084c	0.274247
YBL103c	YER129w				YHR178w	YDR100w	0.876297
YBL103c	YER158c				YHR178w	YDR158w	0.475057
YBL103c	YFR008w				YHR178w	YDR171w	0.296539
YBL103c	YFR017c				YHR178w	YDR179c	0.463972
YBL103c	YFR022w				YHR178w	YDR179w-a	0.418966
YBL103c	YGL001c				YHR178w	YDR219c	0.983385
YBL103c	YGL009c				YHR178w	YDR221w	0.458809
YBL103c	YGL159w				YHR178w	YDR232w	0.246555
YBL103c	YGL255w				YHR178w	YDR248c	0.204262
YBL103c	YGR043c				YHR178w	YDR258c	0.35357
YBL103c	YGR071c				YHR178w	YDR259c	0.854043
YBL103c	YGR072w				YHR178w	YDR262w	0.538054
YBL103c	YGR142w				YHR178w	YDR294c	0.511361
YBL103c	YGR188c				YHR178w	YDR345c	0.822942
YBL103c	YGR218w				YHR178w	YDR346c	0.484978
YBL103c	YGR254w				YHR178w	YDR347w	0.480694
YBL103c	YGR271w				YHR178w	YDR358w	0.167985
YBL103c	YGR272c				YHR178w	YDR399w	0.838285
YBL103c	YGR286c				YHR178w	YDR441c	0.536878
YBL103c	YHL030w				YHR178w	YDR496c	0.395781
YBL103c	YHR018c				YHR178w	YDR510w	0.333421
YBL103c	YHR037w				YHR178w	YDR516c	0.571531
YBL103c	YHR051w				YHR178w	YDR525w-a	0.858584
YBL103c	YHR081w				YHR178w	YEL026w	0.589678
YBL103c	YHR104w				YHR178w	YEL041w	0.393478
YBL103c	YHR136c				YHR178w	YEL044w	0.588131
YBL103c	YHR156c				YHR178w	YEL060c	0.706788
YBL103c	YHR161c				YHR178w	YER054c	0.0660415
YBL103c	YHR162w				YHR178w	YER055c	0.399473
YBL103c	YIL037c				YHR178w	YER060w	0.38274
YBL103c	YIL045w				YHR178w	YER064c	0.136375
YBL103c	YIL056w				YHR178w	YER070w	0.625433
YBL103c	YIL136w				YHR178w	YER075c	0.983002
YBL103c	YIR029w				YHR178w	YER082c	0.109041
YBL103c	YJL023c				YHR178w	YER088c	0.158017
YBL103c	YJL031c				YHR178w	YER126c	0.0185592
YBL103c	YJL088w				YHR178w	YER145c	0.575401
YBL103c	YJL144w				YHR178w	YER146w	0.326526
YBL103c	YJL204c				YHR178w	YER177w	0.506128
YBL103c	YJL217w				YHR178w	YFL023w	0.0303163
YBL103c	YJR011c				YHR178w	YFL024c	0.46353
YBL103c	YJR109c				YHR178w	YFL030w	0.0394204
YBL103c	YJR110w				YHR178w	YFL056c	0.0464648
YBL103c	YJR148w				YHR178w	YFR022w	0.911649
YBL103c	YKL067w				YHR178w	YFR043c	0.773739
YBL103c	YKL071w				YHR178w	YFR057w	0.458753
YBL103c	YKL179c				YHR178w	YGL001c	0.565686
YBL103c	YKL216w				YHR178w	YGL061c	0.387031
YBL103c	YKL219w				YHR178w	YGL117w	0.453592
YBL103c	YKL220c				YHR178w	YGL125w	0.162379
YBL103c	YKL221w				YHR178w	YGL169w	0.583423
YBL103c	YKR004c				YHR178w	YGL174w	0.935975
YBL103c	YKR009c				YHR178w	YGL184c	0.443595
YBL103c	YKR039w				YHR178w	YGL227w	0.574496
YBL103c	YKR056w				YHR178w	YGL253w	0.581522
YBL103c	YKR075c				YHR178w	YGR065c	0.99678
YBL103c	YKR089c				YHR178w	YGR081c	0.462034
YBL103c	YKR102w				YHR178w	YGR128c	0.332325
YBL103c	YLL001w				YHR178w	YGR133w	0.19001
YBL103c	YLL004w				YHR178w	YGR145w	0.369276
YBL103c	YLL005c				YHR178w	YGR150c	0.694008
YBL103c	YLL015w				YHR178w	YGR187c	0.0332672
YBL103c	YLL055w				YHR178w	YGR194c	0.168067
YBL103c	YLR009w				YHR178w	YGR217w	0.199773
YBL103c	YLR049c				YHR178w	YGR218w	0.635554
YBL103c	YLR082c				YHR178w	YGR236c	0.101764
YBL103c	YLR107w				YHR178w	YGR283c	0.860628
YBL103c	YLR113w				YHR178w	YHL024w	0.876864
YBL103c	YLR130c				YHR178w	YHL028w	0.588707
YBL103c	YLR136c				YHR178w	YHL029c	0.367145
YBL103c	YLR141w				YHR178w	YHR028c	0.240389
YBL103c	YLR142w				YHR178w	YHR053c	0.561366
YBL103c	YLR258w				YHR178w	YHR062c	0.498322
YBL103c	YLR266c				YHR178w	YHR066w	0.634739
YBL103c	YLR267w				YHR178w	YHR087w	0.0757552
YBL103c	YLR276c				YHR178w	YHR094c	0.768968
YBL103c	YLR304c				YHR178w	YHR120w	0.283597
YBL103c	YLR316c				YHR178w	YHR137w	0.947771
YBL103c	YLR318w				YHR178w	YHR156c	0.121013
YBL103c	YLR327c				YHR178w	YHR157w	0.432474
YBL103c	YLR346c				YHR178w	YHR160c	0.301047
YBL103c	YLR397c				YHR178w	YHR162w	0.544738
YBL103c	YML110c				YHR178w	YHR170w	0.141532
YBL103c	YML123c				YHR178w	YHR172w	0.026887
YBL103c	YMR019w				YHR178w	YHR178w	0.112053
YBL103c	YMR098c				YHR178w	YHR181w	0.210615
YBL103c	YMR178w				YHR178w	YHR184w	0.696182
YBL103c	YMR192w				YHR178w	YHR196w	0.566216
YBL103c	YMR193w				YHR178w	YHR197w	0.777635
YBL103c	YMR227c				YHR178w	YHR207c	0.459847
YBL103c	YMR228w				YHR178w	YIL019w	0.246956
YBL103c	YMR251w-a				YHR178w	YIL091c	0.669106
YBL103c	YMR258c				YHR178w	YIL099w	0.451519
YBL103c	YNL001w				YHR178w	YIL119c	0.10981
YBL103c	YNL002c				YHR178w	YIL132c	0.479756
YBL103c	YNL010w				YHR178w	YIL159w	0.446808
YBL103c	YNL036w				YHR178w	YIL160c	0.579269
YBL103c	YNL037c				YHR178w	YIL169c	0.0336876
YBL103c	YNL134c				YHR178w	YIR012w	0.0872531
YBL103c	YNR001c				YHR178w	YJL050w	0.192982
YBL103c	YNR017w				YHR178w	YJL057c	0.436539
YBL103c	YNR053c				YHR178w	YJL098w	0.0546482
YBL103c	YOL001w				YHR178w	YJL116c	0.0851706
YBL103c	YOL145c				YHR178w	YJL144w	0.26753
YBL103c	YOL159c				YHR178w	YJL148w	0.554799
YBL103c	YOR032c				YHR178w	YJL153c	0.639605
YBL103c	YOR107w				YHR178w	YJL196c	0.504084
YBL103c	YOR136w				YHR178w	YJR041c	0.0533687
YBL103c	YOR148c				YHR178w	YJR088c	0.921713
YBL103c	YOR153w				YHR178w	YJR089w	0.299429
YBL103c	YOR302w				YHR178w	YKL001c	0.192327
YBL103c	YOR303w				YHR178w	YKL009w	0.664846
YBL103c	YOR306c				YHR178w	YKL062w	0.144551
YBL103c	YPL012w				YHR178w	YKL064w	0.935313
YBL103c	YPL054w				YHR178w	YKL071w	0.466005
YBL103c	YPL093w				YHR178w	YKL096w	0.0213542
YBL103c	YPL111w				YHR178w	YKL109w	0.121011
YBL103c	YPL124w				YHR178w	YKL120w	0.941056
YBL103c	YPL125w				YHR178w	YKL135c	0.79664
YBL103c	YPL135w				YHR178w	YKL179c	0.748965
YBL103c	YPL137c				YHR178w	YKL205w	0.118775
YBL103c	YPL268w				YHR178w	YKL221w	0.239932
YBL103c	YPR001w				YHR178w	YKR009c	0.339418
YBL103c	YPR002w				YHR178w	YKR024c	0.565147
YBL103c	YPR040w				YHR178w	YKR039w	0.6334
YBL103c	YPR119w				YHR178w	YKR042w	0.425518
YBL103c	YPR198w				YHR178w	YKR056w	0.516405
YBR049c	YAL030w				YHR178w	YKR079c	0.274726
YBR049c	YAL031c				YHR178w	YKR099w	0.6085
YBR049c	YAL038w				YHR178w	YLL008w	0.176339
YBR049c	YAL054c				YHR178w	YLL011w	0.459954
YBR049c	YBL013w				YHR178w	YLL028w	0.963156
YBR049c	YBL014c				YHR178w	YLL034c	0.31083
YBR049c	YBL058w				YHR178w	YLR009w	0.0589431
YBR049c	YBL059c-a				YHR178w	YLR098c	0.411391
YBR049c	YBL059w				YHR178w	YLR110c	0.500439
YBR049c	YBR019c				YHR178w	YLR113w	0.508381
YBR049c	YBR020w				YHR178w	YLR141w	0.135228
YBR049c	YBR049c				YHR178w	YLR149c	0.459854
YBR049c	YBR095c				YHR178w	YLR150w	0.558591
YBR049c	YBR096w				YHR178w	YLR152c	0.244678
YBR049c	YBR164c				YHR178w	YLR174w	0.329905
YBR049c	YBR170c				YHR178w	YLR186w	0.30221
YBR049c	YBR171w				YHR178w	YLR199c	0.103604
YBR049c	YBR222c				YHR178w	YLR200w	0.475073
YBR049c	YBR236c				YHR178w	YLR222c	0.383694
YBR049c	YBR237w				YHR178w	YLR276c	0.060243
YBR049c	YCR012w				YHR178w	YLR304c	0.0540874
YBR049c	YCR032w				YHR178w	YLR348c	0.883115
YBR049c	YCR042c				YHR178w	YLR375w	0.231539
YBR049c	YCR093w				YHR178w	YLR397c	0.205646
YBR049c	YCR094w				YHR178w	YLR401c	0.235466
YBR049c	YDL045w-a				YHR178w	YLR409c	0.0637906
YBR049c	YDL046w				YHR178w	YLR419w	0.299429
YBR049c	YDL102w				YHR178w	YLR435w	0.34403
YBR049c	YDL137w				YHR178w	YLR437c	0.3088
YBR049c	YDL138w				YHR178w	YLR438w	0.0969826
YBR049c	YDL140c				YHR178w	YML007w	0.947587
YBR049c	YDL155w				YHR178w	YML008c	0.607483
YBR049c	YDL161w				YHR178w	YML027w	0.131567
YBR049c	YDL164c				YHR178w	YML049c	0.48854
YBR049c	YDL186w				YHR178w	YML060w	0.915162
YBR049c	YDL188c				YHR178w	YML082w	0.187159
YBR049c	YDL212w				YHR178w	YML093w	0.328481
YBR049c	YDL213c				YHR178w	YML119w	0.457959
YBR049c	YDL225w				YHR178w	YML123c	0.0270516
YBR049c	YDL226c				YHR178w	YMR040w	0.485864
YBR049c	YDL233w				YHR178w	YMR049c	0.0445622
YBR049c	YDR003w				YHR178w	YMR056c	0.0355019
YBR049c	YDR028c				YHR178w	YMR070w	0.272726
YBR049c	YDR030c				YHR178w	YMR093w	0.208313
YBR049c	YDR036c				YHR178w	YMR105c	0.118937
YBR049c	YDR037w				YHR178w	YMR136w	0.780492
YBR049c	YDR050c				YHR178w	YMR145c	0.456668
YBR049c	YDR146c				YHR178w	YMR239c	0.96883
YBR049c	YDR155c				YHR178w	YMR272c	0.533671
YBR049c	YDR156w				YHR178w	YMR290c	0.0626531
YBR049c	YDR158w				YHR178w	YMR300c	0.74428
YBR049c	YDR257c				YHR178w	YMR315w	0.413269
YBR049c	YDR313c				YHR178w	YMR319c	0.372405
YBR049c	YDR322c-a				YHR178w	YNL055c	0.621848
YBR049c	YDR323c				YHR178w	YNL065w	0.0310523
YBR049c	YDR328c				YHR178w	YNL075w	0.222467
YBR049c	YDR457w				YHR178w	YNL111c	0.343029
YBR049c	YDR465c				YHR178w	YNL112w	0.0247571
YBR049c	YDR466w				YHR178w	YNL126w	0.874103
YBR049c	YEL012w				YHR178w	YNL182c	0.770746
YBR049c	YEL013w				YHR178w	YNL187w	0.585328
YBR049c	YEL022w				YHR178w	YNL194c	0.00818158
YBR049c	YEL023c				YHR178w	YNL204c	0.58072
YBR049c	YER012w				YHR178w	YNL231c	0.949143
YBR049c	YER013w				YHR178w	YNL241c	0.677389
YBR049c	YER025w				YHR178w	YNL273w	0.966995
YBR049c	YER039c				YHR178w	YNL274c	0.931222
YBR049c	YER039c-a				YHR178w	YNL275w	0.865917
YBR049c	YER040w				YHR178w	YNL299w	0.0818144
YBR049c	YER048w-a				YHR178w	YNL300w	0.616195
YBR049c	YER049w				YHR178w	YNR002c	0.78578
YBR049c	YER068w				YHR178w	YNR012w	0.656636
YBR049c	YER069w				YHR178w	YOL041c	0.00258535
YBR049c	YER086w				YHR178w	YOL080c	0.546534
YBR049c	YER105c				YHR178w	YOL109w	0.263221
YBR049c	YER106w				YHR178w	YOL121c	0.414056
YBR049c	YER156c				YHR178w	YOL125w	0.180235
YBR049c	YER157w				YHR178w	YOL126c	0.835965
YBR049c	YFL005w				YHR178w	YOL136c	0.787164
YBR049c	YFL007w				YHR178w	YOL143c	0.257276
YBR049c	YFL023w				YHR178w	YOL163w	0.26015
YBR049c	YFL024c				YHR178w	YOR028c	0.335726
YBR049c	YFL039c				YHR178w	YOR086c	0.573115
YBR049c	YFR050c				YHR178w	YOR087w	0.396407
YBR049c	YGL026c				YHR178w	YOR098c	0.24481
YBR049c	YGL068w				YHR178w	YOR099w	0.309314
YBR049c	YGL070c				YHR178w	YOR107w	0.514539
YBR049c	YGL089c				YHR178w	YOR119c	0.446782
YBR049c	YGL119w				YHR178w	YOR120w	0.0524857
YBR049c	YGL120c				YHR178w	YOR153w	0.852238
YBR049c	YGL151w				YHR178w	YOR183w	0.522046
YBR049c	YGL159w				YHR178w	YOR273c	0.839037
YBR049c	YGL181w				YHR178w	YOR274w	0.074935
YBR049c	YGL183c				YHR178w	YOR287c	0.579788
YBR049c	YGL191w				YHR178w	YOR294w	0.217415
YBR049c	YGL192w				YHR178w	YOR310c	0.477702
YBR049c	YGL198w				YHR178w	YOR315w	0.909217
YBR049c	YGL200c				YHR178w	YOR344c	0.99875
YBR049c	YGL237c				YHR178w	YOR369c	0.571262
YBR049c	YGL238w				YHR178w	YOR386w	0.16183
YBR049c	YGL240w				YHR178w	YPL012w	0.0557434
YBR049c	YGL244w				YHR178w	YPL016w	0.801892
YBR049c	YGL245w				YHR178w	YPL017c	0.315212
YBR049c	YGR012w				YHR178w	YPL026c	0.104232
YBR049c	YGR078c				YHR178w	YPL043w	0.0168277
YBR049c	YGR079w				YHR178w	YPL052w	0.571917
YBR049c	YGR147c				YHR178w	YPL061w	0.856285
YBR049c	YGR179c				YHR178w	YPL065w	0.275189
YBR049c	YGR184c				YHR178w	YPL079w	0.865756
YBR049c	YGR192c				YHR178w	YPL093w	0.16162
YBR049c	YGR231c				YHR178w	YPL113c	0.494291
YBR049c	YGR232w				YHR178w	YPL123c	0.119349
YBR049c	YGR235c				YHR178w	YPL135w	0.751102
YBR049c	YGR241c				YHR178w	YPL177c	0.449678
YBR049c	YGR243w				YHR178w	YPL183c	0.181855
YBR049c	YGR254w				YHR178w	YPL203w	0.871292
YBR049c	YGR271c-a				YHR178w	YPL212c	0.0535637
YBR049c	YHL031c				YHR178w	YPL247c	0.762681
YBR049c	YHR025w				YHR178w	YPR013c	0.436569
YBR049c	YHR026w				YHR178w	YPR015c	0.521816
YBR049c	YHR039c-a				YHR178w	YPR049c	0.466197
YBR049c	YHR040w				YHR178w	YPR074c	0.221132
YBR049c	YHR146w				YHR178w	YPR075c	0.388731
YBR049c	YIL022w				YHR178w	YPR112c	0.305556
YBR049c	YIL023c				YHR178w	YPR137w	0.0746543
YBR049c	YIL075c				YHR178w	YPR149w	0.563125
YBR049c	YIL108w				YHR178w	YPR192w	0.525037
YBR049c	YIL109c				YMR164c	YAR050w	0.162226
YBR049c	YIL112w				YMR164c	YBL039c	0.171988
YBR049c	YIL113w				YMR164c	YBL074c	0.428201
YBR049c	YIL126w				YMR164c	YBL078c	0.024112
YBR049c	YIL148w				YMR164c	YBL087c	0.362806
YBR049c	YIL149c				YMR164c	YBR184w	0.734772
YBR049c	YIR001c				YMR164c	YBR247c	0.109013
YBR049c	YIR002c				YMR164c	YCR072c	0.335371
YBR049c	YIR003w				YMR164c	YCR105w	0.651449
YBR049c	YJL001w				YMR164c	YCR107w	0.189164
YBR049c	YJL002c				YMR164c	YDL063c	0.0101653
YBR049c	YJL106w				YMR164c	YDL110c	0.453147
YBR049c	YJL148w				YMR164c	YDR119w	0.297174
YBR049c	YJL158c				YMR164c	YDR317w	0.0451313
YBR049c	YJL196c				YMR164c	YEL039c	0.251361
YBR049c	YJR007w				YMR164c	YER006w	0.303619
YBR049c	YJR085c				YMR164c	YER155c	0.812571
YBR049c	YJR086w				YMR164c	YGL055w	0.543045
YBR049c	YJR090c				YMR164c	YGL247w	0.407471
YBR049c	YJR097w				YMR164c	YGR024c	0.881166
YBR049c	YJR098c				YMR164c	YGR079w	0.642385
YBR049c	YJR099w				YMR164c	YGR103w	0.367722
YBR049c	YJR100c				YMR164c	YGR159c	0.128165
YBR049c	YJR122w				YMR164c	YGR175c	0.266189
YBR049c	YKL025c				YMR164c	YHR118c	0.332429
YBR049c	YKL052c				YMR164c	YHR119w	0.683546
YBR049c	YKL058w				YMR164c	YHR169w	0.0749736
YBR049c	YKL059c				YMR164c	YIL140w	0.323682
YBR049c	YKL072w				YMR164c	YIR019c	0.61898
YBR049c	YKL073w				YMR164c	YJL118w	0.646066
YBR049c	YKL081w				YMR164c	YJL121c	0.36902
YBR049c	YKL082c				YMR164c	YJR041c	0.0533687
YBR049c	YKL104c				YMR164c	YJR042w	0.473414
YBR049c	YKL122c				YMR164c	YKL007w	0.194788
YBR049c	YKL146w				YMR164c	YKL008c	0.131511
YBR049c	YKL148c				YMR164c	YKR008w	0.725609
YBR049c	YKL182w				YMR164c	YLR033w	0.834218
YBR049c	YKL203c				YMR164c	YLR098c	0.411391
YBR049c	YKL220c				YMR164c	YLR175w	0.132504
YBR049c	YKR015c				YMR164c	YNL202w	0.697554
YBR049c	YKR016w				YMR164c	YNL204c	0.58072
YBR049c	YKR068c				YMR164c	YNL206c	0.912851
YBR049c	YKR069w				YMR164c	YNL256w	0.10448
YBR049c	YLL033w				YMR164c	YNL257c	0.680394
YBR049c	YLL034c				YMR164c	YOL077w-a	0.438803
YBR049c	YLL040c				YMR164c	YOL078w	0.450167
YBR049c	YLR032w				YMR164c	YOL080c	0.546534
YBR049c	YLR083c				YMR164c	YOR084w	0.480047
YBR049c	YLR110c				YMR164c	YOR173w	0.128983
YBR049c	YLR113w				YMR164c	YOR206w	0.22222
YBR049c	YLR170c				YMR164c	YOR341w	0.403587
YBR049c	YLR223c				YMR164c	YPL024w	0.356257
YBR049c	YLR224w				YMR164c	YPL026c	0.104232
YBR049c	YLR274w				YMR164c	YPR082c	4.82872e-05
YBR049c	YLR378c				YMR164c	YPR083w	0.872718
YBR049c	YLR380w				YMR164c	YPR112c	0.305556
YBR049c	YLR388w				YMR164c	YPR133c	0.0975716
YBR049c	YML001w				YMR164c	YPR133w-a	0.539007
YBR049c	YML002w				YMR164c	YPR134w	0.586083
YBR049c	YML119w				YOR038c	YBL001c	0.624154
YBR049c	YML120c				YOR038c	YBL002w	0.470265
YBR049c	YML129c				YOR038c	YBL004w	0.438684
YBR049c	YMR001c				YOR038c	YBR009c	0.177615
YBR049c	YMR019w				YOR038c	YBR010w	0.00539263
YBR049c	YMR039c				YOR038c	YBR053c	0.291616
YBR049c	YMR040w				YOR038c	YBR060c	0.209362
YBR049c	YMR047c				YOR038c	YBR066c	0.5078
YBR049c	YMR048w				YOR038c	YBR098w	0.243703
YBR049c	YMR117c				YOR038c	YDL001w	0.0543734
YBR049c	YMR121c				YOR038c	YDL070w	0.495114
YBR049c	YMR122w-a				YOR038c	YDL075w	0.486429
YBR049c	YMR182c				YOR038c	YDL143w	0.374885
YBR049c	YMR185w				YOR038c	YDR032c	0.70145
YBR049c	YMR186w				YOR038c	YDR042c	0.575771
YBR049c	YMR188c				YOR038c	YDR101c	0.0326355
YBR049c	YMR189w				YOR038c	YDR103w	0.448352
YBR049c	YMR213w				YOR038c	YDR224c	0.267836
YBR049c	YMR214w				YOR038c	YDR225w	0.993109
YBR049c	YMR221c				YOR038c	YDR277c	0.66897
YBR049c	YMR280c				YOR038c	YEL001c	0.345596
YBR049c	YMR281w				YOR038c	YER044c	0.468535
YBR049c	YMR311c				YOR038c	YGR055w	0.104193
YBR049c	YNL001w				YOR038c	YGR170w	0.477109
YBR049c	YNL008c				YOR038c	YGR233c	0.499536
YBR049c	YNL090w				YOR038c	YGR234w	0.261496
YBR049c	YNL091w				YOR038c	YGR240c	0.28896
YBR049c	YNL092w				YOR038c	YGR253c	0.739266
YBR049c	YNL111c				YOR038c	YGR258c	0.574166
YBR049c	YNL113w				YOR038c	YJL012c	0.588477
YBR049c	YNL115c				YOR038c	YJL160c	0.264136
YBR049c	YNL117w				YOR038c	YKL062w	0.144551
YBR049c	YNL118c				YOR038c	YKL109w	0.121011
YBR049c	YNL157w				YOR038c	YKL110c	0.147076
YBR049c	YNL161w				YOR038c	YKR093w	0.380405
YBR049c	YNL169c				YOR038c	YLL001w	0.611619
YBR049c	YNL216w				YOR038c	YLL026w	0.426942
YBR049c	YNL262w				YOR038c	YML001w	0.425983
YBR049c	YNL263c				YOR038c	YML123c	0.0270516
YBR049c	YNL284c				YOR038c	YMR010w	0.236773
YBR049c	YNR011c				YOR038c	YNL031c	0.571057
YBR049c	YNR012w				YOR038c	YNL146w	0.434285
YBR049c	YNR013c				YOR038c	YNL147w	0.287413
YBR049c	YNR016c				YOR038c	YOL001w	0.575865
YBR049c	YNR039c				YOR038c	YOR017w	0.341908
YBR049c	YNR040w				YOR038c	YOR152c	0.152354
YBR049c	YOL004w				YOR038c	YOR153w	0.852238
YBR049c	YOL005c				YOR038c	YOR154w	0.959402
YBR049c	YOL006c				YOR038c	YPL005w	0.0796611
YBR049c	YOL144w				YOR038c	YPL060w	0.193667
YBR049c	YOL145c				YOR038c	YPL061w	0.856285
YBR049c	YOR044w				YOR038c	YPL241c	0.143738
YBR049c	YOR048c				YOR038c	YPR013c	0.436569
YBR049c	YOR074c
YBR049c	YOR075w
YBR049c	YOR076c
YBR049c	YOR093c
YBR049c	YOR094w
YBR049c	YOR116c
YBR049c	YOR117w
YBR049c	YOR120w
YBR049c	YOR122c
YBR049c	YOR128c
YBR049c	YOR148c
YBR049c	YOR149c
YBR049c	YOR150w
YBR049c	YOR186w
YBR049c	YOR187w
YBR049c	YOR196c
YBR049c	YOR198c
YBR049c	YOR272w
YBR049c	YOR287c
YBR049c	YOR319w
YBR049c	YOR335c
YBR049c	YOR336w
YBR049c	YPL078c
YBR049c	YPL180w
YBR049c	YPL181w
YBR049c	YPL204w
YBR049c	YPL206c
YBR049c	YPL212c
YBR049c	YPL231w
YBR049c	YPR025c
YBR049c	YPR026w
YBR049c	YPR029c
YBR049c	YPR034w
YBR049c	YPR052c
YBR049c	YPR054w
YBR049c	YPR055w
YBR049c	YPR066w
YBR049c	YPR067w
YBR049c	YPR074c
YBR049c	YPR100w
YBR049c	YPR101w
YBR049c	YPR119w
YBR049c	YPR163c
YBR049c	YPR164w
YBR049c	YPR181c
YBR049c	YPR182w
YBR066c	YAL034w-a
YBR066c	YAR066w
YBR066c	YBR018c
YBR066c	YBR052c
YBR066c	YBR067c
YBR066c	YBR069c
YBR066c	YBR132c
YBR066c	YBR147w
YBR066c	YBR156c
YBR066c	YCL027w
YBR066c	YCR075c
YBR066c	YDL004w
YBR066c	YDL085c-a
YBR066c	YDL091c
YBR066c	YDL181w
YBR066c	YDL240w
YBR066c	YDR030c
YBR066c	YDR031w
YBR066c	YDR038c
YBR066c	YDR041w
YBR066c	YDR070c
YBR066c	YDR107c
YBR066c	YDR237w
YBR066c	YDR277c
YBR066c	YDR286c
YBR066c	YDR298c
YBR066c	YDR377w
YBR066c	YDR461w
YBR066c	YEL011w
YBR066c	YEL024w
YBR066c	YEL039c
YBR066c	YER047c
YBR066c	YER058w
YBR066c	YER096w
YBR066c	YER170w
YBR066c	YFR011c
YBR066c	YFR015c
YBR066c	YFR053c
YBR066c	YGL010w
YBR066c	YGL032c
YBR066c	YGL143c
YBR066c	YGL187c
YBR066c	YGL226w
YBR066c	YGL255w
YBR066c	YGR053c
YBR066c	YGR088w
YBR066c	YGR108w
YBR066c	YGR110w
YBR066c	YGR221c
YBR066c	YHL028w
YBR066c	YHL033c
YBR066c	YHR031c
YBR066c	YHR033w
YBR066c	YHR043c
YBR066c	YHR051w
YBR066c	YHR080c
YBR066c	YIL001w
YBR066c	YIL013c
YBR066c	YIL087c
YBR066c	YIL098c
YBR066c	YIL099w
YBR066c	YIL101c
YBR066c	YIL113w
YBR066c	YIL119c
YBR066c	YIL162w
YBR066c	YIR032c
YBR066c	YJL003w
YBR066c	YJL078c
YBR066c	YJL079c
YBR066c	YJL170c
YBR066c	YJL196c
YBR066c	YJL210w
YBR066c	YJR048w
YBR066c	YJR121w
YBR066c	YJR127c
YBR066c	YJR135c
YBR066c	YJR153w
YBR066c	YKL016c
YBR066c	YKL150w
YBR066c	YKR083c
YBR066c	YKR093w
YBR066c	YLR042c
YBR066c	YLR411w
YBR066c	YML054c
YBR066c	YML081c-a
YBR066c	YML087c
YBR066c	YML091c
YBR066c	YML120c
YBR066c	YML123c
YBR066c	YMR003w
YBR066c	YMR031c
YBR066c	YMR035w
YBR066c	YMR058w
YBR066c	YMR105c
YBR066c	YMR145c
YBR066c	YMR157c
YBR066c	YMR188c
YBR066c	YMR195w
YBR066c	YMR244c-a
YBR066c	YMR250w
YBR066c	YMR252c
YBR066c	YMR256c
YBR066c	YMR286w
YBR066c	YNL052w
YBR066c	YNL173c
YBR066c	YNL200c
YBR066c	YNL237w
YBR066c	YNL274c
YBR066c	YNL279w
YBR066c	YNL306w
YBR066c	YNR060w
YBR066c	YOL042w
YBR066c	YOL071w
YBR066c	YOL154w
YBR066c	YOR049c
YBR066c	YOR100c
YBR066c	YOR136w
YBR066c	YOR161c
YBR066c	YOR179c
YBR066c	YOR185c
YBR066c	YOR187w
YBR066c	YOR315w
YBR066c	YOR347c
YBR066c	YOR348c
YBR066c	YOR349w
YBR066c	YOR374w
YBR066c	YPL004c
YBR066c	YPL074w
YBR066c	YPL078c
YBR066c	YPL113c
YBR066c	YPL134c
YBR066c	YPL177c
YBR066c	YPL183w-a
YBR066c	YPL271w
YBR066c	YPR020w
YBR066c	YPR101w
YBR066c	YPR149w
YBR066c	YPR151c
YBR066c	YPR191w
YBR083w	YAL028w
YBR083w	YAL029c
YBR083w	YAL038w
YBR083w	YAL039c
YBR083w	YAL040c
YBR083w	YAL041w
YBR083w	YAR010c
YBR083w	YAR014c
YBR083w	YAR015w
YBR083w	YAR071w
YBR083w	YBL002w
YBR083w	YBL004w
YBR083w	YBL011w
YBR083w	YBL014c
YBR083w	YBL016w
YBR083w	YBL017c
YBR083w	YBL027w
YBR083w	YBL028c
YBR083w	YBL029c-a
YBR083w	YBL029w
YBR083w	YBL030c
YBR083w	YBL037w
YBR083w	YBL041w
YBR083w	YBL042c
YBR083w	YBL043w
YBR083w	YBL044w
YBR083w	YBL045c
YBR083w	YBL099w
YBR083w	YBR007c
YBR083w	YBR011c
YBR083w	YBR021w
YBR083w	YBR040w
YBR083w	YBR048w
YBR083w	YBR066c
YBR083w	YBR067c
YBR083w	YBR077c
YBR083w	YBR078w
YBR083w	YBR082c
YBR083w	YBR083w
YBR083w	YBR093c
YBR083w	YBR094w
YBR083w	YBR117c
YBR083w	YBR118w
YBR083w	YBR133c
YBR083w	YBR135w
YBR083w	YBR150c
YBR083w	YBR151w
YBR083w	YBR162c
YBR083w	YBR162w-a
YBR083w	YBR200w
YBR083w	YBR202w
YBR083w	YBR208c
YBR083w	YBR210w
YBR083w	YBR301w
YBR083w	YCL021w-a
YBR083w	YCL027w
YBR083w	YCR005c
YBR083w	YCR017c
YBR083w	YCR018c
YBR083w	YCR023c
YBR083w	YCR027c
YBR083w	YCR061w
YBR083w	YCR089w
YBR083w	YCR107w
YBR083w	YDL047w
YBR083w	YDL048c
YBR083w	YDL049c
YBR083w	YDL055c
YBR083w	YDL126c
YBR083w	YDL127w
YBR083w	YDL128w
YBR083w	YDL160c
YBR083w	YDL161w
YBR083w	YDL182w
YBR083w	YDL183c
YBR083w	YDL214c
YBR083w	YDL222c
YBR083w	YDR011w
YBR083w	YDR034c
YBR083w	YDR041w
YBR083w	YDR043c
YBR083w	YDR044w
YBR083w	YDR055w
YBR083w	YDR077w
YBR083w	YDR098c
YBR083w	YDR099w
YBR083w	YDR132c
YBR083w	YDR169c
YBR083w	YDR169c-a
YBR083w	YDR170c
YBR083w	YDR171w
YBR083w	YDR180w
YBR083w	YDR186c
YBR083w	YDR188w
YBR083w	YDR210w
YBR083w	YDR211w
YBR083w	YDR226w
YBR083w	YDR249c
YBR083w	YDR251w
YBR083w	YDR259c
YBR083w	YDR261c
YBR083w	YDR262w
YBR083w	YDR275w
YBR083w	YDR309c
YBR083w	YDR316w-b
YBR083w	YDR317w
YBR083w	YDR342c
YBR083w	YDR345c
YBR083w	YDR365c
YBR083w	YDR378c
YBR083w	YDR379w
YBR083w	YDR384c
YBR083w	YDR385w
YBR083w	YDR441c
YBR083w	YDR446w
YBR083w	YDR447c
YBR083w	YDR448w
YBR083w	YDR451c
YBR083w	YDR452w
YBR083w	YDR461w
YBR083w	YDR463w
YBR083w	YDR508c
YBR083w	YDR510w
YBR083w	YDR522c
YBR083w	YDR524c-b
YBR083w	YDR525w-a
YBR083w	YDR528w
YBR083w	YEL001c
YBR083w	YEL007w
YBR083w	YEL009c
YBR083w	YEL011w
YBR083w	YEL021w
YBR083w	YEL040w
YBR083w	YEL062w
YBR083w	YEL063c
YBR083w	YER001w
YBR083w	YER053c-a
YBR083w	YER056c
YBR083w	YER064c
YBR083w	YER070w
YBR083w	YER073w
YBR083w	YER075c
YBR083w	YER103w
YBR083w	YER109c
YBR083w	YER118c
YBR083w	YER120w
YBR083w	YER137c
YBR083w	YER138w-a
YBR083w	YER145c
YBR083w	YER146w
YBR083w	YER149c
YBR083w	YER150w
YBR083w	YER158c
YBR083w	YER159c
YBR083w	YER177w
YBR083w	YER184c
YBR083w	YER185w
YBR083w	YFL014w
YBR083w	YFL016c
YBR083w	YFL039c
YBR083w	YFL047w
YBR083w	YFL048c
YBR083w	YFR053c
YBR083w	YFR055w
YBR083w	YGL006w-a
YBR083w	YGL007c-a
YBR083w	YGL032c
YBR083w	YGL036w
YBR083w	YGL037c
YBR083w	YGL062w
YBR083w	YGL076c
YBR083w	YGL096w
YBR083w	YGL145w
YBR083w	YGL146c
YBR083w	YGL147c
YBR083w	YGL158w
YBR083w	YGL162w
YBR083w	YGL163c
YBR083w	YGL178w
YBR083w	YGL179c
YBR083w	YGL192w
YBR083w	YGL194c
YBR083w	YGR014w
YBR083w	YGR027c
YBR083w	YGR028w
YBR083w	YGR032w
YBR083w	YGR040w
YBR083w	YGR052w
YBR083w	YGR060w
YBR083w	YGR086c
YBR083w	YGR101w
YBR083w	YGR121c
YBR083w	YGR121w-a
YBR083w	YGR122w
YBR083w	YGR125w
YBR083w	YGR143w
YBR083w	YGR149w
YBR083w	YGR152c
YBR083w	YGR153w
YBR083w	YGR161c
YBR083w	YGR162w
YBR083w	YGR183c
YBR083w	YGR189c
YBR083w	YGR191w
YBR083w	YGR213c
YBR083w	YGR218w
YBR083w	YGR221c
YBR083w	YGR222w
YBR083w	YGR229c
YBR083w	YGR230w
YBR083w	YGR233c
YBR083w	YGR234w
YBR083w	YGR249w
YBR083w	YGR250c
YBR083w	YGR251w
YBR083w	YHL015w
YBR083w	YHL015w-a
YBR083w	YHL016c
YBR083w	YHL021c
YBR083w	YHL024w
YBR083w	YHL044w
YBR083w	YHR005c
YBR083w	YHR007c
YBR083w	YHR033w
YBR083w	YHR084w
YBR083w	YHR092c
YBR083w	YHR094c
YBR083w	YHR096c
YBR083w	YHR141c
YBR083w	YHR142w
YBR083w	YHR152w
YBR083w	YHR156c
YBR083w	YIL095w
YBR083w	YIL096c
YBR083w	YIL116w
YBR083w	YIL117c
YBR083w	YIL118w
YBR083w	YIL119c
YBR083w	YIL123w
YBR083w	YIL140w
YBR083w	YIL172c
YBR083w	YIR013c
YBR083w	YIR017c
YBR083w	YIR018c-a
YBR083w	YIR018w
YBR083w	YIR019c
YBR083w	YIR021w
YBR083w	YIR027c
YBR083w	YIR028w
YBR083w	YIR029w
YBR083w	YIR031c
YBR083w	YJL045w
YBR083w	YJL047c-a
YBR083w	YJL048c
YBR083w	YJL083w
YBR083w	YJL084c
YBR083w	YJL105w
YBR083w	YJL112w
YBR083w	YJL130c
YBR083w	YJL145w
YBR083w	YJL158c
YBR083w	YJL186w
YBR083w	YJL187c
YBR083w	YJL194w
YBR083w	YJL196c
YBR083w	YJL214w
YBR083w	YJL216c
YBR083w	YJR025c
YBR083w	YJR094c
YBR083w	YJR094w-a
YBR083w	YJR109c
YBR083w	YJR110w
YBR083w	YJR113c
YBR083w	YJR115w
YBR083w	YJR123w
YBR083w	YJR127c
YBR083w	YJR148w
YBR083w	YJR152w
YBR083w	YJR153w
YBR083w	YKL006c-a
YBR083w	YKL006w
YBR083w	YKL028w
YBR083w	YKL029c
YBR083w	YKL032c
YBR083w	YKL043w
YBR083w	YKL095w
YBR083w	YKL096c-b
YBR083w	YKL096w
YBR083w	YKL096w-a
YBR083w	YKL101w
YBR083w	YKL103c
YBR083w	YKL104c
YBR083w	YKL109w
YBR083w	YKL110c
YBR083w	YKL156w
YBR083w	YKL157w
YBR083w	YKL163w
YBR083w	YKL164c
YBR083w	YKL179c
YBR083w	YKL201c
YBR083w	YKR011c
YBR083w	YKR013w
YBR083w	YKR031c
YBR083w	YKR034w
YBR083w	YKR038c
YBR083w	YKR039w
YBR083w	YKR041w
YBR083w	YKR042w
YBR083w	YKR061w
YBR083w	YKR091w
YBR083w	YKR100c
YBR083w	YKR101w
YBR083w	YLL015w
YBR083w	YLL052c
YBR083w	YLL054c
YBR083w	YLR023c
YBR083w	YLR035c
YBR083w	YLR042c
YBR083w	YLR053c
YBR083w	YLR084c
YBR083w	YLR110c
YBR083w	YLR113w
YBR083w	YLR120c
YBR083w	YLR157w-c
YBR083w	YLR220w
YBR083w	YLR227c
YBR083w	YLR250w
YBR083w	YLR257w
YBR083w	YLR303w
YBR083w	YLR332w
YBR083w	YLR342w
YBR083w	YLR347c
YBR083w	YLR353w
YBR083w	YLR360w
YBR083w	YLR401c
YBR083w	YLR403w
YBR083w	YLR412c-a
YBR083w	YLR413w
YBR083w	YLR414c
YBR083w	YLR417w
YBR083w	YLR438w
YBR083w	YLR446w
YBR083w	YLR449w
YBR083w	YML041c
YBR083w	YML072c
YBR083w	YML088w
YBR083w	YML091c
YBR083w	YML100w
YBR083w	YMR006c
YBR083w	YMR016c
YBR083w	YMR017w
YBR083w	YMR037c
YBR083w	YMR041c
YBR083w	YMR042w
YBR083w	YMR049c
YBR083w	YMR052w
YBR083w	YMR065w
YBR083w	YMR081c
YBR083w	YMR083w
YBR083w	YMR088c
YBR083w	YMR121c
YBR083w	YMR122w-a
YBR083w	YMR135c
YBR083w	YMR136w
YBR083w	YMR164c
YBR083w	YMR173w
YBR083w	YMR194c-b
YBR083w	YMR195w
YBR083w	YMR199w
YBR083w	YMR201c
YBR083w	YMR202w
YBR083w	YMR232w
YBR083w	YMR235c
YBR083w	YMR236w
YBR083w	YMR240c
YBR083w	YMR241w
YBR083w	YMR244c-a
YBR083w	YMR246w
YBR083w	YMR247c
YBR083w	YMR247w-a
YBR083w	YMR251w-a
YBR083w	YMR265c
YBR083w	YMR266w
YBR083w	YMR302c
YBR083w	YMR305c
YBR083w	YMR306w
YBR083w	YMR319c
YBR083w	YNL051w
YBR083w	YNL053w
YBR083w	YNL054w
YBR083w	YNL055c
YBR083w	YNL087w
YBR083w	YNL090w
YBR083w	YNL101w
YBR083w	YNL124w
YBR083w	YNL125c
YBR083w	YNL132w
YBR083w	YNL133c
YBR083w	YNL142w
YBR083w	YNL144c
YBR083w	YNL145w
YBR083w	YNL159c
YBR083w	YNL160w
YBR083w	YNL166c
YBR083w	YNL178w
YBR083w	YNL180c
YBR083w	YNL208w
YBR083w	YNL241c
YBR083w	YNL279w
YBR083w	YNL280c
YBR083w	YNL282w
YBR083w	YNL283c
YBR083w	YNL287w
YBR083w	YNL289w
YBR083w	YNL321w
[truncated: 37,523 more rows]

## Sheet: PRSp
TF	Target Gene				TF	Target Gene			TF	Target Gene
YAL051w	YAL016w		YBL005w		YBL005w	YAL003w	0.785504		YBL005w	YLR106c	0.00101589	up		YBL005w	TF	down
YAL051w	YAL025c		YPR015c		YBL005w	YAL005c	0.844646		YDR423c	YLR106c	0.00101589	up		YDR423c	TF	#N/A
YAL051w	YAL034w-a		YLR131c		YBL005w	YAL025c	0.177221		YGL071w	YNL117w	0.00116301	up		YGL071w	TF	#N/A
YAL051w	YAL035w		YHR178w		YBL005w	YAL034w-a	0.444788		YGL073w	YNL117w	0.00116301	up		YGL073w	TF	#N/A
YAL051w	YAL036c		YMR037c		YBL005w	YAL036c	0.0707903		YGL013c	YGR295c	0.00187993	down		YGL013c	TF	#N/A
YAL051w	YAL067c		YGL073w		YBL005w	YAL059w	0.168741		YGL071w	YGR232w	0.00205558	down		YMR037c	TF	#N/A
YAL051w	YAR035w		YDR423c		YBL005w	YAL061w	0.30746		YMR037c	YGR232w	0.00205558	down		YDR216w	TF	#N/A
YAL051w	YAR071w		YDR216w		YBL005w	YAL065c	0.0378447		YDR423c	YFL052w	0.00289826	down		YHR178w	TF	#N/A
YAL051w	YBL008w		YPL139c		YBL005w	YAR071w	0.0727751		YGL071w	YFL052w	0.00289826	down		YPR015c	TF	#N/A
YAL051w	YBL049w		YGL071w		YBL005w	YAR075w	0.427594		YDR216w	YDR259c	0.00366197	up		YLR131c	TF	#N/A
YAL051w	YBL075c		YMR164c		YBL005w	YBL004w	0.0307589		YGL013c	YDR259c	0.00366197	up		YMR164c	TF	#N/A
YAL051w	YBL089w		YGL013c		YBL005w	YBL005w	0.023114		YGL073w	YDR259c	0.00366197	up		YPL139c	TF	#N/A
YAL051w	YBL095w				YBL005w	YBL005w-a	0.191686		YHR178w	YDR259c	0.00366197	up		YLR106c	target	up
YAL051w	YBR006w				YBL005w	YBL006c	0.0433228		YMR037c	YDR259c	0.00366197	up		YNL117w	target	up
YAL051w	YBR019c				YBL005w	YBL007c	0.979416		YGL073w	YDR394w	0.00395743	down		YGR295c	target	down
YAL051w	YBR020w				YBL005w	YBL011w	0.878196		YBL005w	YNL108c	0.00421702	up		YGR232w	target	down
YAL051w	YBR053c				YBL005w	YBL028c	0.0850446		YGL073w	YNL167c	0.00455553	down		YFL052w	target	down
YAL051w	YBR054w				YBL005w	YBL029w	0.50528		YBL005w	YOL022c	0.00477099	up		YDR259c	target	up
YAL051w	YBR072w				YBL005w	YBL036c	0.155637		YDR423c	YOL107w	0.00486013	down		YDR394w	target	down
YAL051w	YBR074w				YBL005w	YBL039c	0.130834		YDR216w	YOR388c	0.00490221	down		YNL108c	target	up
YAL051w	YBR117c				YBL005w	YBL041w	0.0401132		YBL005w	YKL216w	0.00491704	up		YNL167c	target	down
YAL051w	YBR127c				YBL005w	YBL042c	0.141821		YDR216w	YKL216w	0.00491704	up		YOL022c	target	up
YAL051w	YBR150c				YBL005w	YBL043w	0.512376		YDR423c	YKL216w	0.00491704	up		YOL107w	target	down
YAL051w	YBR151w				YBL005w	YBL049w	0.261207		YGL013c	YKL216w	0.00491704	up		YOR388c	target	down
YAL051w	YBR154c				YBL005w	YBL054w	0.462945		YDR423c	YIL098c	0.00550245	down		YKL216w	target	up
YAL051w	YBR159w				YBL005w	YBL102w	0.190335		YPR015c	YIL098c	0.00550245	down		YIL098c	target	down
YAL051w	YBR187w				YBL005w	YBL103c	0.229257		YBL005w	YOR310c	0.00587587	up		YOR310c	target	up
YAL051w	YBR200w				YBL005w	YBR008c	0.989919		YHR178w	YOR310c	0.00587587	up		YGR245c	target	up
YAL051w	YBR214w				YBL005w	YBR034c	0.585015		YBL005w	YGR245c	0.00607605	up		YOL131w	target	down
YAL051w	YBR222c				YBL005w	YBR047w	0.485934		YDR216w	YGR245c	0.00607605	up		YPL146c	target	up
YAL051w	YBR295w				YBL005w	YBR054w	0.376307		YGL013c	YGR245c	0.00607605	up		YIL022w	target	up
YAL051w	YCL042w				YBL005w	YBR072w	0.693015		YMR037c	YGR245c	0.00607605	up		YGL198w	target	down
YAL051w	YCL048w				YBL005w	YBR084w	0.399916		YGL073w	YOL131w	0.00627825	down		YGR224w	target	down
YAL051w	YCR005c				YBL005w	YBR092c	0.775413		YMR037c	YPL146c	0.00668	up		YOR098c	target	up
YAL051w	YCR010c				YBL005w	YBR093c	0.0634843		YGL071w	YIL022w	0.00683711	up		YIL018w	target	up
YAL051w	YCR020c-a				YBL005w	YBR126c	0.277925		YGL071w	YGL198w	0.00735834	down		YHR162w	target	down
YAL051w	YCR081w				YBL005w	YBR142w	0.136593		YBL005w	YGR224w	0.0075069	down		YKL053c-a	target	down
YAL051w	YDL024c				YBL005w	YBR145w	0.502573		YGL013c	YGR224w	0.0075069	down		YDL188c	target	down
YAL051w	YDL037c				YBL005w	YBR147w	0.391053		YGL073w	YOR098c	0.00779536	up		YBR076w	target	down
YAL051w	YDL038c				YBL005w	YBR149w	0.61945		YHR178w	YOR098c	0.00779536	up		YGL226w	target	down
YAL051w	YDL039c				YBL005w	YBR169c	0.190602		YGL013c	YIL018w	0.00792061	up		YDL159w	target	up
YAL051w	YDL078c				YBL005w	YBR177c	0.999765		YBL005w	YHR162w	0.0080569	down		YGR272c	target	up
YAL051w	YDL110c				YBL005w	YBR201w	0.389301		YGL013c	YHR162w	0.0080569	down		YLR359w	target	up
YAL051w	YDL132w				YBL005w	YBR214w	0.176632		YHR178w	YHR162w	0.0080569	down		YGR008c	target	down
YAL051w	YDL135c				YBL005w	YBR244w	0.239604		YPR015c	YHR162w	0.0080569	down		YCR107w	target	down
YAL051w	YDL145c				YBL005w	YBR256c	0.460207		YMR037c	YKL053c-a	0.00840211	down		YLR192c	target	down
YAL051w	YDL178w				YBL005w	YBR296c	0.492036		YGL071w	YDL188c	0.00852515	down		YLR113w	target	down
YAL051w	YDL179w				YBL005w	YCL026c-a	0.0695649		YDR216w	YBR076w	0.00874225	down		YJR098c	target	down
YAL051w	YDL223c				YBL005w	YCL026c-b	0.595152		YGL073w	YBR076w	0.00874225	down		YCR037c	target	up
YAL051w	YDR034w-b				YBL005w	YCL030c	0.374624		YLR131c	YGL226w	0.00945747	down		YER125w	target	down
YAL051w	YDR071c				YBL005w	YCL037c	0.576559		YDR216w	YDL159w	0.00974944	up		YNL209w	target	up
YAL051w	YDR083w				YBL005w	YCL040w	0.721931		YHR178w	YDL159w	0.00974944	up		YBR215w	target	up
YAL051w	YDR111c				YBL005w	YCL042w	0.2569		YMR037c	YGR272c	0.0098489	up		YOL004w	target	down
YAL051w	YDR207c				YBL005w	YCL043c	0.892609		YDR423c	YLR359w	0.0103691	up		YDR071c	target	down
YAL051w	YDR208w				YBL005w	YCL054w	0.282903		YBL005w	YGR008c	0.0105312	down		YBL014c	target	up
YAL051w	YDR244w				YBL005w	YCL059c	0.29257		YDR216w	YGR008c	0.0105312	down		YNL082w	target	up
YAL051w	YDR255c				YBL005w	YCR005c	0.206399		YGL013c	YGR008c	0.0105312	down		YCR043c	target	up
YAL051w	YDR256c				YBL005w	YCR010c	0.853531		YGL071w	YGR008c	0.0105312	down		YJL155c	target	down
YAL051w	YDR281c				YBL005w	YCR053w	0.422751		YMR037c	YGR008c	0.0105312	down		YCL045c	target	up
YAL051w	YDR384c				YBL005w	YCR057c	0.549601		YGL071w	YCR107w	0.0106801	down		YLR155c	target	down
YAL051w	YDR492w				YBL005w	YCR061w	0.865185		YMR164c	YCR107w	0.0106801	down		YDR111c	target	up
YAL051w	YDR528w				YBL005w	YCR102c	0.0560063		YDR423c	YLR192c	0.010937	down		YKR069w	target	up
YAL051w	YDR533c				YBL005w	YDL014w	0.349668		YGL071w	YLR192c	0.010937	down		YGL028c	target	up
YAL051w	YDR536w				YBL005w	YDL020c	0.0229968		YGL013c	YLR113w	0.0110474	down		YOR063w	target	up
YAL051w	YEL011w				YBL005w	YDL029w	0.16524		YGL071w	YLR113w	0.0110474	down		YNL262w	target	up
YAL051w	YEL040w				YBL005w	YDL108w	0.17956		YHR178w	YLR113w	0.0110474	down		YDR282c	target	down
YAL051w	YEL060c				YBL005w	YDL124w	0.388622		YGL071w	YJR098c	0.011124	down		YHR071w	target	down
YAL051w	YER015w				YBL005w	YDL139c	0.140186		YDR423c	YCR037c	0.0111618	up		YJR138w	target	down
YAL051w	YER024w				YBL005w	YDL159w-a	0.924147		YLR131c	YER125w	0.012203	down		YPR101w	target	up
YAL051w	YER065c				YBL005w	YDL222c	0.670659		YBL005w	YNL209w	0.0125733	up		YKR055w	target	up
YAL051w	YER103w				YBL005w	YDL229w	0.0967209		YPR015c	YBR215w	0.0126409	up		YLR284c	target	down
YAL051w	YGL045w				YBL005w	YDL248w	0.0908376		YGL071w	YOL004w	0.012681	down		YEL006w	target	down
YAL051w	YGL063w				YBL005w	YDR006c	0.884268		YDR216w	YDR071c	0.0136535	down		YEL049w	target	down
YAL051w	YGL143c				YBL005w	YDR009w	0.793971		YGL073w	YDR071c	0.0136535	down		YPL206c	target	down
YAL051w	YGL201c				YBL005w	YDR011w	0.663539		YGL071w	YBL014c	0.0138737	up		YER163c	target	down
YAL051w	YGL205w				YBL005w	YDR021w	0.497027		YMR037c	YNL082w	0.0146109	up		YMR275c	target	down
YAL051w	YGL207w				YBL005w	YDR025w	0.90388		YDR423c	YCR043c	0.0149326	up		YDR402c	target	down
YAL051w	YGL235w				YBL005w	YDR033w	0.376253		YMR037c	YJL155c	0.0159208	down		YDL020c	target	down
YAL051w	YGL237c				YBL005w	YDR034w-b	0.0365573		YGL013c	YCL045c	0.0160017	up		YBL005w	target	down
YAL051w	YGR035c				YBL005w	YDR043c	0.202704		YBL005w	YLR155c	0.0168917	down		YHR086w	target	up
YAL051w	YGR052w				YBL005w	YDR054c	0.169703		YDR216w	YLR155c	0.0168917	down		YHL022c	target	down
YAL051w	YGR065c				YBL005w	YDR055w	0.0361048		YDR216w	YDR111c	0.0169591	up		YDL142c	target	down
YAL051w	YGR079w				YBL005w	YDR062w	0.131246		YGL071w	YKR069w	0.0172612	up		YHR030c	target	up
YAL051w	YGR081c				YBL005w	YDR070c	0.395136		YBL005w	YGL028c	0.0179884	up		YOR371c	target	up
YAL051w	YGR088w				YBL005w	YDR072c	0.965407		YGL013c	YGL028c	0.0179884	up		YCL069w	target	down
YAL051w	YGR109c				YBL005w	YDR073w	0.339188		YLR131c	YGL028c	0.0179884	up		YPL034w	target	down
YAL051w	YGR109w-a				YBL005w	YDR074w	0.279431		YMR037c	YOR063w	0.0184004	up		YDR525w-a	target	down
YAL051w	YGR109w-b				YBL005w	YDR093w	0.344885		YGL071w	YNL262w	0.0187808	up		YLL009c	target	down
YAL051w	YGR138c				YBL005w	YDR165w	0.628618		YGL013c	YDR282c	0.0191671	down		YDR089w	target	down
YAL051w	YGR188c				YBL005w	YDR171w	0.193481		YBL005w	YHR071w	0.0193103	down		YDR059c	target	down
YAL051w	YGR201c				YBL005w	YDR184c	0.66856		YDR216w	YHR071w	0.0193103	down		YBR014c	target	down
YAL051w	YGR256w				YBL005w	YDR214w	0.933387		YGL013c	YHR071w	0.0193103	down		YOL125w	target	up
YAL051w	YGR271c-a				YBL005w	YDR258c	0.0491899		YGL071w	YHR071w	0.0193103	down		YJL037w	target	down
YAL051w	YGR289c				YBL005w	YDR297w	0.595921		YGL071w	YJR138w	0.0197939	down		YBR275c	target	up
YAL051w	YHL017w				YBL005w	YDR299w	0.453903		YGL071w	YPR101w	0.0198342	up		YBR157c	target	down
YAL051w	YHR041c				YBL005w	YDR321w	0.700965		YMR037c	YKR055w	0.0204888	up		YDL147w	target	down
YAL051w	YHR042w				YBL005w	YDR324c	0.459287		YDR216w	YLR284c	0.0215268	down		YHR157w	target	down
YAL051w	YHR049w				YBL005w	YDR345c	0.216024		YGL073w	YLR284c	0.0215268	down		YDR138w	target	down
YAL051w	YHR053c				YBL005w	YDR353w	0.274158		YLR131c	YEL006w	0.0216399	down		YGL120c	target	up
YAL051w	YHR087w				YBL005w	YDR361c	0.756524		YGL071w	YEL049w	0.0224083	down		YNL098c	target	down
YAL051w	YHR096c				YBL005w	YDR369c	0.94757		YGL071w	YPL206c	0.0224358	down		YBL004w	target	up
YAL051w	YHR113w				YBL005w	YDR380w	0.577498		YDR423c	YER163c	0.0225344	down		YJL001w	target	down
YAL051w	YHR117w				YBL005w	YDR398w	0.155599		YGL073w	YMR275c	0.0226903	down		YJR137c	target	up
YAL051w	YHR139c				YBL005w	YDR399w	0.497819		YGL071w	YDR402c	0.0229719	down		YPL119c	target	down
YAL051w	YHR140w				YBL005w	YDR404c	0.677684		YBL005w	YDL020c	0.0229968	down		YDR055w	target	down
YAL051w	YHR160c				YBL005w	YDR405w	0.552577		YGL013c	YDL020c	0.0229968	down		YDR034w-b	target	down
YAL051w	YIL069c				YBL005w	YDR406w	0.92829		YGL071w	YDL020c	0.0229968	down		YAL009w	target	down
YAL051w	YIL113w				YBL005w	YDR415c	0.639668		YGL073w	YDL020c	0.0229968	down		YPR084w	target	up
YAL051w	YIL114c				YBL005w	YDR416w	0.226302		YMR037c	YDL020c	0.0229968	down		YPL170w	target	up
YAL051w	YIL120w				YBL005w	YDR418w	0.833684		YBL005w	YBL005w	0.023114	down		YAL065c	target	down
YAL051w	YIL160c				YBL005w	YDR447c	0.899671		YGL013c	YBL005w	0.023114	down		YDR267c	target	up
YAL051w	YJL045w				YBL005w	YDR449c	0.342152		YGL073w	YBL005w	0.023114	down		YBL111c	target	down
YAL051w	YJL141c				YBL005w	YDR450w	0.43327		YDR216w	YHR086w	0.023685	up		YMR227c	target	up
YAL051w	YJL153c				YBL005w	YDR465c	0.377194		YGL013c	YHR086w	0.023685	up		YDR068w	target	up
YAL051w	YJL179w				YBL005w	YDR468c	0.859244		YPL139c	YHL022c	0.0242584	down		YGR251w	target	up
YAL051w	YJL196c				YBL005w	YDR469w	0.774822		YDR216w	YDL142c	0.0248776	down		YOL032w	target	down
YAL051w	YJL200c				YBL005w	YDR492w	0.265437		YGL013c	YHR030c	0.0253047	up		YPL036w	target	down
YAL051w	YJL218w				YBL005w	YDR496c	0.281998		YMR037c	YOR371c	0.0253737	up		YGR171c	target	down
YAL051w	YJR019c				YBL005w	YDR516c	0.0923828		YGL071w	YCL069w	0.0254106	down		YBL041w	target	down
YAL051w	YJR069c				YBL005w	YDR533c	0.335955		YGL071w	YPL034w	0.0258019	down		YIL105c	target	down
YAL051w	YKL093w				YBL005w	YEL011w	0.329619		YGL013c	YDR525w-a	0.0264005	down		YLR170c	target	down
YAL051w	YKL146w				YBL005w	YEL020w-a	0.0434173		YHR178w	YDR525w-a	0.0264005	down		YFL020c	target	down
YAL051w	YKL148c				YBL005w	YEL026w	0.800363		YLR131c	YDR525w-a	0.0264005	down		YBR153w	target	up
YAL051w	YKL163w				YBL005w	YEL039c	0.768165		YMR037c	YDR525w-a	0.0264005	down		YOR207c	target	up
YAL051w	YKL188c				YBL005w	YEL046c	0.26313		YMR037c	YLL009c	0.0267434	down		YOR065w	target	up
YAL051w	YKL201c				YBL005w	YEL054c	0.877434		YDR216w	YDR089w	0.0271558	down		YGR154c	target	down
YAL051w	YKL220c				YBL005w	YEL060c	0.316368		YDR423c	YDR089w	0.0271558	down		YBL006c	target	down
YAL051w	YKR009c				YBL005w	YEL071w	0.257395		YMR037c	YDR089w	0.0271558	down		YEL020w-a	target	down
YAL051w	YKR097w				YBL005w	YER006w	0.238635		YDR216w	YDR059c	0.0274767	down		YAR031w	target	down
YAL051w	YLL006w				YBL005w	YER037w	0.794565		YGL073w	YDR059c	0.0274767	down		YEL070w	target	down
YAL051w	YLL008w				YBL005w	YER042w	0.660666		YMR037c	YBR014c	0.0275434	down		YMR241w	target	up
YAL051w	YLL052c				YBL005w	YER052c	0.0906593		YGL013c	YOL125w	0.0275718	up		YDR155c	target	down
YAL051w	YLR002c				YBL005w	YER062c	0.804384		YHR178w	YOL125w	0.0275718	up		YJL026w	target	up
YAL051w	YLR009w				YBL005w	YER067w	0.238987		YGL073w	YJL037w	0.0286055	down		YGR253c	target	down
YAL051w	YLR054c				YBL005w	YER069w	0.562186		YGL073w	YBR275c	0.0286799	up		YAL039c	target	down
YAL051w	YLR089c				YBL005w	YER072w	0.132181		YDR423c	YBR157c	0.0287169	down		YGL009c	target	down
YAL051w	YLR090w				YBL005w	YER103w	0.812065		YGL013c	YBR157c	0.0287169	down		YNL206c	target	up
YAL051w	YLR142w				YBL005w	YER110c	0.257704		YLR131c	YBR157c	0.0287169	down		YGR238c	target	down
YAL051w	YLR149c				YBL005w	YER126c	0.765398		YGL013c	YDL147w	0.0287485	down		YKR103w	target	down
YAL051w	YLR162w				YBL005w	YER130c	0.42611		YGL071w	YHR157w	0.0289545	down		YDL046w	target	down
YAL051w	YLR164w				YBL005w	YER142c	0.890567		YGL073w	YHR157w	0.0289545	down		YDR258c	target	down
YAL051w	YLR174w				YBL005w	YER143w	0.560926		YHR178w	YHR157w	0.0289545	down		YMR269w	target	up
YAL051w	YLR176c				YBL005w	YER145c	0.930475		YMR037c	YHR157w	0.0289545	down
YAL051w	YLR177w				YBL005w	YER150w	0.556262		YGL073w	YDR138w	0.0290875	down
YAL051w	YLR178c				YBL005w	YER175c	0.510292		YBL005w	YGL120c	0.0300431	up
YAL051w	YLR197w				YBL005w	YER185w	0.381574		YGL071w	YGL120c	0.0300431	up
YAL051w	YLR284c				YBL005w	YFL014w	0.912599		YLR131c	YNL098c	0.030364	down
YAL051w	YLR285w				YBL005w	YFL027c	0.413481		YMR037c	YNL098c	0.030364	down
YAL051w	YLR373c				YBL005w	YFL056c	0.261733		YBL005w	YBL004w	0.0307589	up
YAL051w	YLR375w				YBL005w	YFL064c	0.166109		YGL013c	YJL001w	0.0342152	down
YAL051w	YLR401c				YBL005w	YFR006w	0.933793		YGL071w	YJL001w	0.0342152	down
YAL051w	YLR449w				YBL005w	YFR027w	0.111295		YGL071w	YJR137c	0.0348419	up
YAL051w	YML004c				YBL005w	YFR053c	0.382991		YDR423c	YPL119c	0.03567	down
YAL051w	YML042w				YBL005w	YGL028c	0.0179884		YGL073w	YPL119c	0.03567	down
YAL051w	YML072c				YBL005w	YGL029w	0.234373		YBL005w	YDR055w	0.0361048	down
YAL051w	YML093w				YBL005w	YGL030w	0.988379		YGL013c	YDR055w	0.0361048	down
YAL051w	YML128c				YBL005w	YGL037c	0.150074		YLR131c	YDR055w	0.0361048	down
YAL051w	YML131w				YBL005w	YGL039w	0.653792		YBL005w	YDR034w-b	0.0365573	down
YAL051w	YMR018w				YBL005w	YGL055w	0.713062		YDR216w	YDR034w-b	0.0365573	down
YAL051w	YMR043w				YBL005w	YGL062w	0.29022		YDR423c	YDR034w-b	0.0365573	down
YAL051w	YMR107w				YBL005w	YGL089c	0.98743		YGL013c	YDR034w-b	0.0365573	down
YAL051w	YMR113w				YBL005w	YGL111w	0.543457		YGL073w	YDR034w-b	0.0365573	down
YAL051w	YMR118c				YBL005w	YGL117w	0.359834		YMR037c	YDR034w-b	0.0365573	down
YAL051w	YMR169c				YBL005w	YGL120c	0.0300431		YPR015c	YDR034w-b	0.0365573	down
YAL051w	YMR174c				YBL005w	YGL121c	0.419222		YMR037c	YAL009w	0.0368214	down
YAL051w	YMR175w				YBL005w	YGL141w	0.549793		YDR423c	YPR084w	0.0376478	up
YAL051w	YMR210w				YBL005w	YGL156w	0.449012		YGL073w	YPL170w	0.0377513	up
YAL051w	YMR224c				YBL005w	YGL157w	0.521935		YBL005w	YAL065c	0.0378447	down
YAL051w	YMR227c				YBL005w	YGL171w	0.340671		YGL013c	YAL065c	0.0378447	down
YAL051w	YMR250w				YBL005w	YGL179c	0.77583		YHR178w	YAL065c	0.0378447	down
YAL051w	YMR272c				YBL005w	YGL209w	0.879612		YDR216w	YDR267c	0.0380241	up
YAL051w	YMR303c				YBL005w	YGL253w	0.45215		YDR216w	YBL111c	0.0381368	down
YAL051w	YMR313c				YBL005w	YGL259w	0.731234		YGL013c	YBL111c	0.0381368	down
YAL051w	YMR322c				YBL005w	YGR008c	0.0105312		YMR037c	YMR227c	0.0384337	up
YAL051w	YMR323w				YBL005w	YGR028w	0.695593		YMR037c	YDR068w	0.0390707	up
YAL051w	YNL002c				YBL005w	YGR032w	0.900245		YGL073w	YGR251w	0.0392049	up
YAL051w	YNL009w				YBL005w	YGR035c	0.213257		YGL071w	YOL032w	0.0397614	down
YAL051w	YNL117w				YBL005w	YGR079w	0.501681		YGL073w	YOL032w	0.0397614	down
YAL051w	YNL128w				YBL005w	YGR088w	0.513693		YDR216w	YPL036w	0.0398303	down
YAL051w	YNL141w				YBL005w	YGR103w	0.0978583		YGL071w	YPL036w	0.0398303	down
YAL051w	YNL160w				YBL005w	YGR110w	0.532273		YDR423c	YGR171c	0.0398583	down
YAL051w	YNL182c				YBL005w	YGR123c	0.317162		YBL005w	YBL041w	0.0401132	down
YAL051w	YNL194c				YBL005w	YGR142w	0.626634		YGL071w	YIL105c	0.040752	down
YAL051w	YNL195c				YBL005w	YGR145w	0.228135		YGL071w	YLR170c	0.0408007	down
YAL051w	YNL202w				YBL005w	YGR159c	0.40548		YGL071w	YFL020c	0.0416233	down
YAL051w	YNL270c				YBL005w	YGR161c	0.451996		YPR015c	YFL020c	0.0416233	down
YAL051w	YNL299w				YBL005w	YGR162w	0.691506		YDR423c	YBR153w	0.0419353	up
YAL051w	YNL321w				YBL005w	YGR197c	0.629501		YMR037c	YOR207c	0.0421433	up
YAL051w	YNL322c				YBL005w	YGR200c	0.700035		YGL013c	YOR065w	0.0422805	up
YAL051w	YNR001c				YBL005w	YGR209c	0.10429		YGL073w	YGR154c	0.0429716	down
YAL051w	YNR050c				YBL005w	YGR214w	0.749037		YMR037c	YGR154c	0.0429716	down
YAL051w	YOL002c				YBL005w	YGR224w	0.0075069		YBL005w	YBL006c	0.0433228	down
YAL051w	YOL011w				YBL005w	YGR234w	0.202402		YGL013c	YBL006c	0.0433228	down
YAL051w	YOL041c				YBL005w	YGR243w	0.166024		YBL005w	YEL020w-a	0.0434173	down
YAL051w	YOL083w				YBL005w	YGR245c	0.00607605		YGL013c	YEL020w-a	0.0434173	down
YAL051w	YOL084w				YBL005w	YGR248w	0.213977		YGL073w	YAR031w	0.0435834	down
YAL051w	YOL101c				YBL005w	YGR249w	0.193614		YMR037c	YEL070w	0.0445804	down
YAL051w	YOL119c				YBL005w	YGR271c-a	0.363305		YGL013c	YMR241w	0.0445882	up
YAL051w	YOL126c				YBL005w	YGR280c	0.355233		YGL071w	YDR155c	0.0446293	down
YAL051w	YOL147c				YBL005w	YGR281w	0.851805		YGL073w	YDR155c	0.0446293	down
YAL051w	YOL156w				YBL005w	YGR287c	0.299849		YLR131c	YDR155c	0.0446293	down
YAL051w	YOR017w				YBL005w	YHL011c	0.418602		YPR015c	YJL026w	0.0448462	up
YAL051w	YOR031w				YBL005w	YHL021c	0.917794		YMR037c	YGR253c	0.0449064	down
YAL051w	YOR042w				YBL005w	YHL030w	0.404638		YDR423c	YAL039c	0.0450024	down
YAL051w	YOR048c				YBL005w	YHL036w	0.35545		YDR216w	YGL009c	0.0452601	down
YAL051w	YOR084w				YBL005w	YHR018c	0.467323		YGL071w	YGL009c	0.0452601	down
YAL051w	YOR100c				YBL005w	YHR029c	0.393887		YMR164c	YNL206c	0.0457759	up
YAL051w	YOR101w				YBL005w	YHR044c	0.147535		YDR423c	YGR238c	0.0469096	down
YAL051w	YOR117w				YBL005w	YHR052w	0.437494		YGL071w	YKR103w	0.0471529	down
YAL051w	YOR148c				YBL005w	YHR064c	0.97505		YGL071w	YDL046w	0.0480208	down
YAL051w	YOR153w				YBL005w	YHR066w	0.35794		YBL005w	YDR258c	0.0491899	down
YAL051w	YOR178c				YBL005w	YHR071w	0.0193103		YDR216w	YDR258c	0.0491899	down
YAL051w	YOR180c				YBL005w	YHR087w	0.260905		YGL013c	YDR258c	0.0491899	down
YAL051w	YOR184w				YBL005w	YHR088w	0.0836131		YGL071w	YDR258c	0.0491899	down
YAL051w	YOR186w				YBL005w	YHR089c	0.430153		YGL073w	YDR258c	0.0491899	down
YAL051w	YOR190w				YBL005w	YHR092c	0.241557		YHR178w	YDR258c	0.0491899	down
YAL051w	YOR209c				YBL005w	YHR104w	0.254681		YMR037c	YDR258c	0.0491899	down
YAL051w	YOR229w				YBL005w	YHR128w	0.589435		YDR216w	YMR269w	0.0493096	up
YAL051w	YOR230w				YBL005w	YHR136c	0.290604
YAL051w	YOR268c				YBL005w	YHR138c	0.644424
YAL051w	YOR273c				YBL005w	YHR140w	0.574561
YAL051w	YOR291w				YBL005w	YHR148w	0.687825
YAL051w	YOR298w				YBL005w	YHR162w	0.0080569
YAL051w	YOR302w				YBL005w	YHR169w	0.158711
YAL051w	YOR315w				YBL005w	YHR170w	0.152804
YAL051w	YOR317w				YBL005w	YHR197w	0.555171
YAL051w	YOR332w				YBL005w	YHR216w	0.946055
YAL051w	YOR348c				YBL005w	YIL035c	0.46849
YAL051w	YOR363c				YBL005w	YIL045w	0.839455
YAL051w	YPL016w				YBL005w	YIL056w	0.537832
YAL051w	YPL017c				YBL005w	YIL064w	0.617939
YAL051w	YPL036w				YBL005w	YIL091c	0.327232
YAL051w	YPL051w				YBL005w	YIL099w	0.932304
YAL051w	YPL054w				YBL005w	YIL103w	0.393789
YAL051w	YPL092w				YBL005w	YIL113w	0.0747085
YAL051w	YPL095c				YBL005w	YIL116w	0.700762
YAL051w	YPL112c				YBL005w	YIL117c	0.442882
YAL051w	YPL147w				YBL005w	YIL119c	0.157876
YAL051w	YPL223c				YBL005w	YIL127c	0.301719
YAL051w	YPL262w				YBL005w	YIL133c	0.49766
YAL051w	YPL263c				YBL005w	YIL169c	0.449955
YAL051w	YPL265w				YBL005w	YIL172c	0.700043
YAL051w	YPL274w				YBL005w	YIR026c	0.305689
YAL051w	YPR001w				YBL005w	YJL008c	0.396188
YAL051w	YPR128c				YBL005w	YJL012c	0.542448
YAL051w	YPR148c				YBL005w	YJL052w	0.82399
YBL005w	YAL003w				YBL005w	YJL082w	0.400082
YBL005w	YAL005c				YBL005w	YJL083w	0.0842534
YBL005w	YAL025c				YBL005w	YJL090c	0.994495
YBL005w	YAL034w-a				YBL005w	YJL163c	0.517638
YBL005w	YAL036c				YBL005w	YJL185c	0.797706
YBL005w	YAL059w				YBL005w	YJL189w	0.903256
YBL005w	YAL061w				YBL005w	YJL216c	0.300003
YBL005w	YAL065c				YBL005w	YJL219w	0.814985
YBL005w	YAR071w				YBL005w	YJR007w	0.0643708
YBL005w	YAR075w				YBL005w	YJR096w	0.489181
YBL005w	YBL004w				YBL005w	YJR154w	0.543181
YBL005w	YBL005w				YBL005w	YKL007w	0.13754
YBL005w	YBL005w-a				YBL005w	YKL008c	0.216328
YBL005w	YBL006c				YBL005w	YKL012w	0.934798
YBL005w	YBL007c				YBL005w	YKL013c	0.199693
YBL005w	YBL011w				YBL005w	YKL035w	0.443457
YBL005w	YBL028c				YBL005w	YKL051w	0.660736
YBL005w	YBL029w				YBL005w	YKL056c	0.829849
YBL005w	YBL036c				YBL005w	YKL067w	0.268139
YBL005w	YBL039c				YBL005w	YKL071w	0.575227
YBL005w	YBL041w				YBL005w	YKL077w	0.239518
YBL005w	YBL042c				YBL005w	YKL081w	0.532488
YBL005w	YBL043w				YBL005w	YKL086w	0.397142
YBL005w	YBL049w				YBL005w	YKL103c	0.525268
YBL005w	YBL054w				YBL005w	YKL129c	0.61825
YBL005w	YBL102w				YBL005w	YKL139w	0.911897
YBL005w	YBL103c				YBL005w	YKL216w	0.00491704
YBL005w	YBR008c				YBL005w	YKR092c	0.440071
YBL005w	YBR034c				YBL005w	YLL028w	0.776874
YBL005w	YBR047w				YBL005w	YLL056c	0.863648
YBL005w	YBR054w				YBL005w	YLL060c	0.296675
YBL005w	YBR072w				YBL005w	YLL061w	0.498047
YBL005w	YBR084w				YBL005w	YLL062c	0.862491
YBL005w	YBR092c				YBL005w	YLR003c	0.455367
YBL005w	YBR093c				YBL005w	YLR009w	0.530488
YBL005w	YBR126c				YBL005w	YLR042c	0.712733
YBL005w	YBR142w				YBL005w	YLR051c	0.326234
YBL005w	YBR145w				YBL005w	YLR063w	0.651341
YBL005w	YBR147w				YBL005w	YLR073c	0.568982
YBL005w	YBR149w				YBL005w	YLR074c	0.702627
YBL005w	YBR169c				YBL005w	YLR083c	0.141595
YBL005w	YBR177c				YBL005w	YLR099c	0.699995
YBL005w	YBR201w				YBL005w	YLR100w	0.71547
YBL005w	YBR214w				YBL005w	YLR106c	0.00101589
YBL005w	YBR244w				YBL005w	YLR120c	0.525597
YBL005w	YBR256c				YBL005w	YLR130c	0.5184
YBL005w	YBR296c				YBL005w	YLR136c	0.760841
YBL005w	YCL026c-a				YBL005w	YLR149c	0.277184
YBL005w	YCL026c-b				YBL005w	YLR152c	0.174096
YBL005w	YCL030c				YBL005w	YLR155c	0.0168917
YBL005w	YCL037c				YBL005w	YLR156w	0.138238
YBL005w	YCL040w				YBL005w	YLR172c	0.498023
YBL005w	YCL042w				YBL005w	YLR175w	0.060971
YBL005w	YCL043c				YBL005w	YLR178c	0.138868
YBL005w	YCL054w				YBL005w	YLR180w	0.905362
YBL005w	YCL059c				YBL005w	YLR194c	0.360603
YBL005w	YCR005c				YBL005w	YLR196w	0.23905
YBL005w	YCR010c				YBL005w	YLR197w	0.0702128
YBL005w	YCR053w				YBL005w	YLR216c	0.255036
YBL005w	YCR057c				YBL005w	YLR222c	0.161404
YBL005w	YCR061w				YBL005w	YLR249w	0.312763
YBL005w	YCR102c				YBL005w	YLR264w	0.982352
YBL005w	YDL014w				YBL005w	YLR270w	0.257122
YBL005w	YDL020c				YBL005w	YLR304c	0.300239
YBL005w	YDL029w				YBL005w	YLR323c	0.72341
YBL005w	YDL108w				YBL005w	YLR327c	0.706912
YBL005w	YDL124w				YBL005w	YLR346c	0.325832
YBL005w	YDL139c				YBL005w	YLR409c	0.171179
YBL005w	YDL159w-a				YBL005w	YLR413w	0.804883
YBL005w	YDL222c				YBL005w	YLR437c	0.261368
YBL005w	YDL229w				YBL005w	YLR438w	0.373839
YBL005w	YDL248w				YBL005w	YLR449w	0.154009
YBL005w	YDR006c				YBL005w	YLR460c	0.0924934
YBL005w	YDR009w				YBL005w	YML054c	0.959468
YBL005w	YDR011w				YBL005w	YML056c	0.194782
YBL005w	YDR021w				YBL005w	YML093w	0.251357
YBL005w	YDR025w				YBL005w	YML096w	0.419419
YBL005w	YDR033w				YBL005w	YML097c	0.30889
YBL005w	YDR034w-b				YBL005w	YML100w	0.14983
YBL005w	YDR043c				YBL005w	YML113w	0.554025
YBL005w	YDR054c				YBL005w	YML116w	0.994079
YBL005w	YDR055w				YBL005w	YML123c	0.658575
YBL005w	YDR062w				YBL005w	YML125c	0.734231
YBL005w	YDR070c				YBL005w	YML128c	0.0779183
YBL005w	YDR072c				YBL005w	YML130c	0.355095
YBL005w	YDR073w				YBL005w	YMR006c	0.605972
YBL005w	YDR074w				YBL005w	YMR008c	0.534179
YBL005w	YDR093w				YBL005w	YMR011w	0.667956
YBL005w	YDR165w				YBL005w	YMR020w	0.590168
YBL005w	YDR171w				YBL005w	YMR040w	0.534066
YBL005w	YDR184c				YBL005w	YMR048w	0.0933763
YBL005w	YDR214w				YBL005w	YMR049c	0.364811
YBL005w	YDR258c				YBL005w	YMR062c	0.820813
YBL005w	YDR297w				YBL005w	YMR090w	0.211761
YBL005w	YDR299w				YBL005w	YMR095c	0.198934
YBL005w	YDR321w				YBL005w	YMR096w	0.23019
YBL005w	YDR324c				YBL005w	YMR102c	0.205961
YBL005w	YDR345c				YBL005w	YMR105c	0.222365
YBL005w	YDR353w				YBL005w	YMR128w	0.36311
YBL005w	YDR361c				YBL005w	YMR131c	0.646275
YBL005w	YDR369c				YBL005w	YMR136w	0.637299
YBL005w	YDR380w				YBL005w	YMR165c	0.0984419
YBL005w	YDR398w				YBL005w	YMR169c	0.0999069
YBL005w	YDR399w				YBL005w	YMR174c	0.732211
YBL005w	YDR404c				YBL005w	YMR193w	0.407089
YBL005w	YDR405w				YBL005w	YMR195w	0.133881
YBL005w	YDR406w				YBL005w	YMR246w	0.596898
YBL005w	YDR415c				YBL005w	YMR250w	0.305152
YBL005w	YDR416w				YBL005w	YMR251w-a	0.223289
YBL005w	YDR418w				YBL005w	YMR258c	0.405668
YBL005w	YDR447c				YBL005w	YMR272c	0.827647
YBL005w	YDR449c				YBL005w	YMR291w	0.128858
YBL005w	YDR450w				YBL005w	YNL035c	0.79663
YBL005w	YDR465c				YBL005w	YNL108c	0.00421702
YBL005w	YDR468c				YBL005w	YNL123w	0.543115
YBL005w	YDR469w				YBL005w	YNL134c	0.417637
YBL005w	YDR492w				YBL005w	YNL160w	0.516903
YBL005w	YDR496c				YBL005w	YNL182c	0.266278
YBL005w	YDR516c				YBL005w	YNL202w	0.347648
YBL005w	YDR533c				YBL005w	YNL207w	0.134365
YBL005w	YEL011w				YBL005w	YNL209w	0.0125733
YBL005w	YEL020w-a				YBL005w	YNL231c	0.268343
YBL005w	YEL026w				YBL005w	YNL237w	0.607696
YBL005w	YEL039c				YBL005w	YNL248c	0.617731
YBL005w	YEL046c				YBL005w	YNL258c	0.443122
YBL005w	YEL054c				YBL005w	YNL274c	0.46863
YBL005w	YEL060c				YBL005w	YNL327w	0.665861
YBL005w	YEL071w				YBL005w	YNL331c	0.186401
YBL005w	YER006w				YBL005w	YNR007c	0.149802
YBL005w	YER037w				YBL005w	YNR008w	0.175702
YBL005w	YER042w				YBL005w	YNR012w	0.621655
YBL005w	YER052c				YBL005w	YNR019w	0.300224
YBL005w	YER062c				YBL005w	YNR034w	0.265853
YBL005w	YER067w				YBL005w	YNR044w	0.296816
YBL005w	YER069w				YBL005w	YNR053c	0.408447
YBL005w	YER072w				YBL005w	YNR060w	0.388536
YBL005w	YER103w				YBL005w	YNR067c	0.920431
YBL005w	YER110c				YBL005w	YNR070w	0.5315
YBL005w	YER126c				YBL005w	YNR075w	0.102447
YBL005w	YER130c				YBL005w	YOL001w	0.836174
YBL005w	YER142c				YBL005w	YOL010w	0.414439
YBL005w	YER143w				YBL005w	YOL016c	0.695282
YBL005w	YER145c				YBL005w	YOL022c	0.00477099
YBL005w	YER150w				YBL005w	YOL029c	0.513237
YBL005w	YER175c				YBL005w	YOL030w	0.543002
YBL005w	YER185w				YBL005w	YOL031c	0.259199
YBL005w	YFL014w				YBL005w	YOL052c-a	0.483873
YBL005w	YFL027c				YBL005w	YOL058w	0.367459
YBL005w	YFL056c				YBL005w	YOL077c	0.55497
YBL005w	YFL064c				YBL005w	YOL083w	0.320623
YBL005w	YFR006w				YBL005w	YOL101c	0.0737128
YBL005w	YFR027w				YBL005w	YOL109w	0.893802
YBL005w	YFR053c				YBL005w	YOL123w	0.577026
YBL005w	YGL028c				YBL005w	YOL124c	0.257909
YBL005w	YGL029w				YBL005w	YOL144w	0.494394
YBL005w	YGL030w				YBL005w	YOL151w	0.144136
YBL005w	YGL037c				YBL005w	YOL155c	0.379097
YBL005w	YGL039w				YBL005w	YOL156w	0.987733
YBL005w	YGL055w				YBL005w	YOL158c	0.545558
YBL005w	YGL062w				YBL005w	YOR004w	0.0870845
YBL005w	YGL089c				YBL005w	YOR010c	0.272218
YBL005w	YGL111w				YBL005w	YOR014w	0.135835
YBL005w	YGL117w				YBL005w	YOR018w	0.433528
YBL005w	YGL120c				YBL005w	YOR020c	0.523151
YBL005w	YGL121c				YBL005w	YOR049c	0.461166
YBL005w	YGL141w				YBL005w	YOR052c	0.401819
YBL005w	YGL156w				YBL005w	YOR056c	0.19994
YBL005w	YGL157w				YBL005w	YOR095c	0.422289
YBL005w	YGL171w				YBL005w	YOR101w	0.374932
YBL005w	YGL179c				YBL005w	YOR148c	0.871742
YBL005w	YGL209w				YBL005w	YOR151c	0.20937
YBL005w	YGL253w				YBL005w	YOR152c	0.59835
YBL005w	YGL259w				YBL005w	YOR153w	0.242981
YBL005w	YGR008c				YBL005w	YOR173w	0.242183
YBL005w	YGR028w				YBL005w	YOR178c	0.164851
YBL005w	YGR032w				YBL005w	YOR180c	0.616743
YBL005w	YGR035c				YBL005w	YOR183w	0.965999
YBL005w	YGR079w				YBL005w	YOR192c	0.656845
YBL005w	YGR088w				YBL005w	YOR202w	0.296781
YBL005w	YGR103w				YBL005w	YOR204w	0.419407
YBL005w	YGR110w				YBL005w	YOR206w	0.255872
YBL005w	YGR123c				YBL005w	YOR226c	0.192104
YBL005w	YGR142w				YBL005w	YOR233w	0.0591673
YBL005w	YGR145w				YBL005w	YOR252w	0.181411
YBL005w	YGR159c				YBL005w	YOR272w	0.510711
YBL005w	YGR161c				YBL005w	YOR273c	0.462407
YBL005w	YGR162w				YBL005w	YOR287c	0.484043
YBL005w	YGR197c				YBL005w	YOR289w	0.275112
YBL005w	YGR200c				YBL005w	YOR294w	0.697652
YBL005w	YGR209c				YBL005w	YOR303w	0.809636
YBL005w	YGR214w				YBL005w	YOR310c	0.00587587
YBL005w	YGR224w				YBL005w	YOR327c	0.678205
YBL005w	YGR234w				YBL005w	YOR328w	0.705301
YBL005w	YGR243w				YBL005w	YOR340c	0.588329
YBL005w	YGR245c				YBL005w	YOR341w	0.0841251
YBL005w	YGR248w				YBL005w	YOR344c	0.216094
YBL005w	YGR249w				YBL005w	YOR346w	0.441687
YBL005w	YGR271c-a				YBL005w	YOR348c	0.419037
YBL005w	YGR280c				YBL005w	YOR349w	0.327028
YBL005w	YGR281w				YBL005w	YOR374w	0.383746
YBL005w	YGR287c				YBL005w	YOR382w	0.797642
YBL005w	YHL011c				YBL005w	YOR385w	0.902373
YBL005w	YHL021c				YBL005w	YPL004c	0.379163
YBL005w	YHL030w				YBL005w	YPL012w	0.161719
YBL005w	YHL036w				YBL005w	YPL019c	0.673703
YBL005w	YHR018c				YBL005w	YPL043w	0.0576005
YBL005w	YHR029c				YBL005w	YPL058c	0.604663
YBL005w	YHR044c				YBL005w	YPL061w	0.873704
YBL005w	YHR052w				YBL005w	YPL068c	0.65533
YBL005w	YHR064c				YBL005w	YPL088w	0.747934
YBL005w	YHR066w				YBL005w	YPL093w	0.333789
YBL005w	YHR071w				YBL005w	YPL111w	0.435602
YBL005w	YHR087w				YBL005w	YPL126w	0.219538
YBL005w	YHR088w				YBL005w	YPL135w	0.0600118
YBL005w	YHR089c				YBL005w	YPL154c	0.553239
YBL005w	YHR092c				YBL005w	YPL171c	0.185147
YBL005w	YHR104w				YBL005w	YPL207w	0.635222
YBL005w	YHR128w				YBL005w	YPL211w	0.463436
YBL005w	YHR136c				YBL005w	YPL217c	0.471174
YBL005w	YHR138c				YBL005w	YPL226w	0.237799
YBL005w	YHR140w				YBL005w	YPL240c	0.723159
YBL005w	YHR148w				YBL005w	YPL241c	0.96613
YBL005w	YHR162w				YBL005w	YPL250c	0.0568172
YBL005w	YHR169w				YBL005w	YPL266w	0.277449
YBL005w	YHR170w				YBL005w	YPL274w	0.98247
YBL005w	YHR197w				YBL005w	YPR010c	0.129084
YBL005w	YHR216w				YBL005w	YPR016c	0.998762
YBL005w	YIL035c				YBL005w	YPR110c	0.838705
YBL005w	YIL045w				YBL005w	YPR112c	0.186001
YBL005w	YIL056w				YBL005w	YPR127w	0.528145
YBL005w	YIL064w				YBL005w	YPR143w	0.105792
YBL005w	YIL091c				YBL005w	YPR144c	0.106195
YBL005w	YIL099w				YBL005w	YPR149w	0.889188
YBL005w	YIL103w				YBL005w	YPR160w	0.28516
YBL005w	YIL113w				YBL005w	YPR163c	0.0568862
YBL005w	YIL116w				YBL005w	YPR167c	0.731686
YBL005w	YIL117c				YBL005w	YPR184w	0.222752
YBL005w	YIL119c				YBL005w	YPR190c	0.291788
YBL005w	YIL127c				YDR216w	YAL018c	0.869149
YBL005w	YIL133c				YDR216w	YAL020c	0.35266
YBL005w	YIL169c				YDR216w	YAL022c	0.780818
YBL005w	YIL172c				YDR216w	YAL040c	0.545303
YBL005w	YIR026c				YDR216w	YAL054c	0.859913
YBL005w	YJL008c				YDR216w	YAL059w	0.168741
YBL005w	YJL012c				YDR216w	YAR035w	0.31733
YBL005w	YJL052w				YDR216w	YAR050w	0.368965
YBL005w	YJL082w				YDR216w	YAR068w	0.269273
YBL005w	YJL083w				YDR216w	YAR071w	0.0727751
YBL005w	YJL090c				YDR216w	YAR075w	0.427594
YBL005w	YJL163c				YDR216w	YBL043w	0.512376
YBL005w	YJL185c				YDR216w	YBL051c	0.466859
YBL005w	YJL189w				YDR216w	YBL068w	0.278344
YBL005w	YJL216c				YDR216w	YBL111c	0.0381368
YBL005w	YJL219w				YDR216w	YBR004c	0.760651
YBL005w	YJR007w				YDR216w	YBR005w	0.921303
YBL005w	YJR096w				YDR216w	YBR021w	0.359858
YBL005w	YJR154w				YDR216w	YBR026c	0.521748
YBL005w	YKL007w				YDR216w	YBR045c	0.432284
YBL005w	YKL008c				YDR216w	YBR046c	0.618409
YBL005w	YKL012w				YDR216w	YBR054w	0.376307
YBL005w	YKL013c				YDR216w	YBR056w	0.461735
YBL005w	YKL035w				YDR216w	YBR067c	0.468083
YBL005w	YKL051w				YDR216w	YBR076w	0.00874225
YBL005w	YKL056c				YDR216w	YBR083w	0.191635
YBL005w	YKL067w				YDR216w	YBR093c	0.0634843
YBL005w	YKL071w				YDR216w	YBR109c	0.299441
YBL005w	YKL077w				YDR216w	YBR117c	0.415613
YBL005w	YKL081w				YDR216w	YBR126c	0.277925
YBL005w	YKL086w				YDR216w	YBR145w	0.502573
YBL005w	YKL103c				YDR216w	YBR149w	0.61945
YBL005w	YKL129c				YDR216w	YBR159w	0.292469
YBL005w	YKL139w				YDR216w	YBR183w	0.749285
YBL005w	YKL216w				YDR216w	YBR200w	0.696248
YBL005w	YKR092c				YDR216w	YBR214w	0.176632
YBL005w	YLL028w				YDR216w	YBR222c	0.261001
YBL005w	YLL056c				YDR216w	YBR223c	0.659362
YBL005w	YLL060c				YDR216w	YBR227c	0.488828
YBL005w	YLL061w				YDR216w	YBR228w	0.806623
YBL005w	YLL062c				YDR216w	YBR242w	0.20217
YBL005w	YLR003c				YDR216w	YBR256c	0.460207
YBL005w	YLR009w				YDR216w	YBR257w	0.0855896
YBL005w	YLR042c				YDR216w	YBR291c	0.0642724
YBL005w	YLR051c				YDR216w	YBR294w	0.608776
YBL005w	YLR063w				YDR216w	YCL042w	0.2569
YBL005w	YLR073c				YDR216w	YCL054w	0.282903
YBL005w	YLR074c				YDR216w	YCL059c	0.29257
YBL005w	YLR083c				YDR216w	YCL064c	0.802069
YBL005w	YLR099c				YDR216w	YCR004c	0.234044
YBL005w	YLR100w				YDR216w	YCR010c	0.853531
YBL005w	YLR106c				YDR216w	YCR021c	0.41126
YBL005w	YLR120c				YDR216w	YCR057c	0.549601
YBL005w	YLR130c				YDR216w	YCR068w	0.479897
YBL005w	YLR136c				YDR216w	YCR079w	0.974677
YBL005w	YLR149c				YDR216w	YDL010w	0.500363
YBL005w	YLR152c				YDR216w	YDL017w	0.274069
YBL005w	YLR155c				YDR216w	YDL018c	0.393194
YBL005w	YLR156w				YDR216w	YDL021w	0.476139
YBL005w	YLR172c				YDR216w	YDL024c	0.557038
YBL005w	YLR175w				YDR216w	YDL038c	0.728281
YBL005w	YLR178c				YDR216w	YDL060w	0.316469
YBL005w	YLR180w				YDR216w	YDL073w	0.240498
YBL005w	YLR194c				YDR216w	YDL074c	0.455009
YBL005w	YLR196w				YDR216w	YDL078c	0.512817
YBL005w	YLR197w				YDR216w	YDL091c	0.673911
YBL005w	YLR216c				YDR216w	YDL107w	0.722383
YBL005w	YLR222c				YDR216w	YDL110c	0.195114
YBL005w	YLR249w				YDR216w	YDL117w	0.726228
YBL005w	YLR264w				YDR216w	YDL119c	0.437907
YBL005w	YLR270w				YDR216w	YDL134c	0.870662
YBL005w	YLR304c				YDR216w	YDL142c	0.0248776
YBL005w	YLR323c				YDR216w	YDL145c	0.890294
YBL005w	YLR327c				YDR216w	YDL156w	0.0887232
YBL005w	YLR346c				YDR216w	YDL159w	0.00974944
YBL005w	YLR409c				YDR216w	YDL160c	0.106326
YBL005w	YLR413w				YDR216w	YDL161w	0.970205
YBL005w	YLR437c				YDR216w	YDL170w	0.238519
YBL005w	YLR438w				YDR216w	YDL220c	0.32807
YBL005w	YLR449w				YDR216w	YDL223c	0.305775
YBL005w	YLR460c				YDR216w	YDL240w	0.526976
YBL005w	YML054c				YDR216w	YDR034w-b	0.0365573
YBL005w	YML056c				YDR216w	YDR043c	0.202704
YBL005w	YML093w				YDR216w	YDR059c	0.0274767
YBL005w	YML096w				YDR216w	YDR070c	0.395136
YBL005w	YML097c				YDR216w	YDR071c	0.0136535
YBL005w	YML100w				YDR216w	YDR075w	0.079348
YBL005w	YML113w				YDR216w	YDR077w	0.40318
YBL005w	YML116w				YDR216w	YDR083w	0.201704
YBL005w	YML123c				YDR216w	YDR084c	0.0593758
YBL005w	YML125c				YDR216w	YDR089w	0.0271558
YBL005w	YML128c				YDR216w	YDR101c	0.476579
YBL005w	YML130c				YDR216w	YDR110w	0.168414
YBL005w	YMR006c				YDR216w	YDR111c	0.0169591
YBL005w	YMR008c				YDR216w	YDR120c	0.824274
YBL005w	YMR011w				YDR216w	YDR171w	0.193481
YBL005w	YMR020w				YDR216w	YDR182w	0.675082
YBL005w	YMR040w				YDR216w	YDR183w	0.884515
YBL005w	YMR048w				YDR216w	YDR216w	0.368361
YBL005w	YMR049c				YDR216w	YDR218c	0.852333
YBL005w	YMR062c				YDR216w	YDR244w	0.836198
YBL005w	YMR090w				YDR216w	YDR256c	0.893574
YBL005w	YMR095c				YDR216w	YDR258c	0.0491899
YBL005w	YMR096w				YDR216w	YDR259c	0.00366197
YBL005w	YMR102c				YDR216w	YDR262w	0.189595
YBL005w	YMR105c				YDR216w	YDR267c	0.0380241
YBL005w	YMR128w				YDR216w	YDR294c	0.240184
YBL005w	YMR131c				YDR216w	YDR309c	0.265539
YBL005w	YMR136w				YDR216w	YDR315c	0.209411
YBL005w	YMR165c				YDR216w	YDR361c	0.756524
YBL005w	YMR169c				YDR216w	YDR380w	0.577498
YBL005w	YMR174c				YDR216w	YDR384c	0.612198
YBL005w	YMR193w				YDR216w	YDR399w	0.497819
YBL005w	YMR195w				YDR216w	YDR432w	0.604258
YBL005w	YMR246w				YDR216w	YDR443c	0.273635
YBL005w	YMR250w				YDR216w	YDR449c	0.342152
YBL005w	YMR251w-a				YDR216w	YDR516c	0.0923828
YBL005w	YMR258c				YDR216w	YEL011w	0.329619
YBL005w	YMR272c				YDR216w	YEL017c-a	0.552675
YBL005w	YMR291w				YDR216w	YEL024w	0.811946
YBL005w	YNL035c				YDR216w	YEL035c	0.410308
YBL005w	YNL108c				YDR216w	YEL041w	0.73424
YBL005w	YNL123w				YDR216w	YEL076c	0.161422
YBL005w	YNL134c				YDR216w	YEL076c-a	0.589516
YBL005w	YNL160w				YDR216w	YER011w	0.488849
YBL005w	YNL182c				YDR216w	YER015w	0.768142
YBL005w	YNL202w				YDR216w	YER037w	0.794565
YBL005w	YNL207w				YDR216w	YER054c	0.297987
YBL005w	YNL209w				YDR216w	YER067w	0.238987
YBL005w	YNL231c				YDR216w	YER072w	0.132181
YBL005w	YNL237w				YDR216w	YER073w	0.784561
YBL005w	YNL248c				YDR216w	YER085c	0.192464
YBL005w	YNL258c				YDR216w	YER115c	0.856492
YBL005w	YNL274c				YDR216w	YER126c	0.765398
YBL005w	YNL327w				YDR216w	YER133w	0.77013
YBL005w	YNL331c				YDR216w	YER142c	0.890567
YBL005w	YNR007c				YDR216w	YER150w	0.556262
YBL005w	YNR008w				YDR216w	YER179w	0.913191
YBL005w	YNR012w				YDR216w	YFL014w	0.912599
YBL005w	YNR019w				YDR216w	YFL054c	0.80371
YBL005w	YNR034w				YDR216w	YFL067w	0.179009
YBL005w	YNR044w				YDR216w	YFR007w	0.169376
YBL005w	YNR053c				YDR216w	YFR015c	0.346501
YBL005w	YNR060w				YDR216w	YFR017c	0.824122
YBL005w	YNR067c				YDR216w	YFR034c	0.638318
YBL005w	YNR070w				YDR216w	YFR044c	0.417268
YBL005w	YNR075w				YDR216w	YFR045w	0.909291
YBL005w	YOL001w				YDR216w	YFR053c	0.382991
YBL005w	YOL010w				YDR216w	YGL009c	0.0452601
YBL005w	YOL016c				YDR216w	YGL013c	0.873885
YBL005w	YOL022c				YDR216w	YGL037c	0.150074
YBL005w	YOL029c				YDR216w	YGL055w	0.713062
YBL005w	YOL030w				YDR216w	YGL078c	0.433822
YBL005w	YOL031c				YDR216w	YGL081w	0.309039
YBL005w	YOL052c-a				YDR216w	YGL116w	0.826725
YBL005w	YOL058w				YDR216w	YGL145w	0.84945
YBL005w	YOL077c				YDR216w	YGL205w	0.772402
YBL005w	YOL083w				YDR216w	YGL207w	0.437949
YBL005w	YOL101c				YDR216w	YGL225w	0.541777
YBL005w	YOL109w				YDR216w	YGL246c	0.494692
YBL005w	YOL123w				YDR216w	YGR008c	0.0105312
YBL005w	YOL124c				YDR216w	YGR035c	0.213257
YBL005w	YOL144w				YDR216w	YGR041w	0.832445
YBL005w	YOL151w				YDR216w	YGR043c	0.696017
YBL005w	YOL155c				YDR216w	YGR067c	0.776734
YBL005w	YOL156w				YDR216w	YGR079w	0.501681
YBL005w	YOL158c				YDR216w	YGR098c	0.185753
YBL005w	YOR004w				YDR216w	YGR099w	0.499329
YBL005w	YOR010c				YDR216w	YGR123c	0.317162
YBL005w	YOR014w				YDR216w	YGR142w	0.626634
YBL005w	YOR018w				YDR216w	YGR145w	0.228135
YBL005w	YOR020c				YDR216w	YGR177c	0.805411
YBL005w	YOR049c				YDR216w	YGR188c	0.350989
YBL005w	YOR052c				YDR216w	YGR205w	0.321968
YBL005w	YOR056c				YDR216w	YGR230w	0.0769174
YBL005w	YOR095c				YDR216w	YGR236c	0.463115
YBL005w	YOR101w				YDR216w	YGR244c	0.533978
YBL005w	YOR148c				YDR216w	YGR245c	0.00607605
YBL005w	YOR151c				YDR216w	YGR248w	0.213977
YBL005w	YOR152c				YDR216w	YGR256w	0.40354
YBL005w	YOR153w				YDR216w	YGR280c	0.355233
YBL005w	YOR173w				YDR216w	YHL021c	0.917794
YBL005w	YOR178c				YDR216w	YHL032c	0.381742
YBL005w	YOR180c				YDR216w	YHL036w	0.35545
YBL005w	YOR183w				YDR216w	YHR018c	0.467323
YBL005w	YOR192c				YDR216w	YHR028c	0.497683
YBL005w	YOR202w				YDR216w	YHR029c	0.393887
YBL005w	YOR204w				YDR216w	YHR049w	0.977476
YBL005w	YOR206w				YDR216w	YHR052w	0.437494
YBL005w	YOR226c				YDR216w	YHR071w	0.0193103
YBL005w	YOR233w				YDR216w	YHR086w	0.023685
YBL005w	YOR252w				YDR216w	YHR087w	0.260905
YBL005w	YOR272w				YDR216w	YHR097c	0.132458
YBL005w	YOR273c				YDR216w	YHR136c	0.290604
YBL005w	YOR287c				YDR216w	YHR137w	0.407037
YBL005w	YOR289w				YDR216w	YHR138c	0.644424
YBL005w	YOR294w				YDR216w	YHR140w	0.574561
YBL005w	YOR303w				YDR216w	YHR155w	0.909015
YBL005w	YOR310c				YDR216w	YHR170w	0.152804
YBL005w	YOR327c				YDR216w	YHR176w	0.451328
YBL005w	YOR328w				YDR216w	YHR208w	0.41473
YBL005w	YOR340c				YDR216w	YHR216w	0.946055
YBL005w	YOR341w				YDR216w	YIL009w	0.683951
YBL005w	YOR344c				YDR216w	YIL057c	0.515316
YBL005w	YOR346w				YDR216w	YIL060w	0.510407
YBL005w	YOR348c				YDR216w	YIL066c	0.491963
YBL005w	YOR349w				YDR216w	YIL107c	0.962949
YBL005w	YOR374w				YDR216w	YIL120w	0.70255
YBL005w	YOR382w				YDR216w	YIL136w	0.702314
YBL005w	YOR385w				YDR216w	YIL146c	0.357357
YBL005w	YPL004c				YDR216w	YIL153w	0.623113
YBL005w	YPL012w				YDR216w	YIL155c	0.638237
YBL005w	YPL019c				YDR216w	YIL160c	0.956928
YBL005w	YPL043w				YDR216w	YIL169c	0.449955
YBL005w	YPL058c				YDR216w	YIR015w	0.715405
YBL005w	YPL061w				YDR216w	YIR016w	0.807683
YBL005w	YPL068c				YDR216w	YIR032c	0.777641
YBL005w	YPL088w				YDR216w	YIR034c	0.523573
YBL005w	YPL093w				YDR216w	YJL023c	0.957431
YBL005w	YPL111w				YDR216w	YJL043w	0.157425
YBL005w	YPL126w				YDR216w	YJL048c	0.884314
YBL005w	YPL135w				YDR216w	YJL057c	0.364674
YBL005w	YPL154c				YDR216w	YJL107c	0.879773
YBL005w	YPL171c				YDR216w	YJL122w	0.423662
YBL005w	YPL207w				YDR216w	YJL131c	0.511169
YBL005w	YPL211w				YDR216w	YJL163c	0.517638
YBL005w	YPL217c				YDR216w	YJL172w	0.363797
YBL005w	YPL226w				YDR216w	YJL196c	0.498415
YBL005w	YPL240c				YDR216w	YJL198w	0.470507
YBL005w	YPL241c				YDR216w	YJL203w	0.841938
YBL005w	YPL250c				YDR216w	YJL204c	0.57866
YBL005w	YPL266w				YDR216w	YJL210w	0.251147
YBL005w	YPL274w				YDR216w	YJL217w	0.645304
YBL005w	YPR010c				YDR216w	YJR019c	0.34658
YBL005w	YPR016c				YDR216w	YJR094c	0.995116
YBL005w	YPR110c				YDR216w	YJR132w	0.176094
YBL005w	YPR112c				YDR216w	YJR140c	0.67303
YBL005w	YPR127w				YDR216w	YJR141w	0.9145
YBL005w	YPR143w				YDR216w	YKL015w	0.734663
YBL005w	YPR144c				YDR216w	YKL016c	0.555847
YBL005w	YPR149w				YDR216w	YKL035w	0.443457
YBL005w	YPR160w				YDR216w	YKL071w	0.575227
YBL005w	YPR163c				YDR216w	YKL086w	0.397142
YBL005w	YPR167c				YDR216w	YKL120w	0.497819
YBL005w	YPR184w				YDR216w	YKL149c	0.139453
YBL005w	YPR190c				YDR216w	YKL157w	0.494167
YBL008w	YAL001c				YDR216w	YKL163w	0.120758
YBL008w	YAR002w				YDR216w	YKL164c	0.345426
YBL008w	YBL029w				YDR216w	YKL187c	0.805301
YBL008w	YBR009c				YDR216w	YKL188c	0.671684
YBL008w	YBR010w				YDR216w	YKL197c	0.970098
YBL008w	YBR095c				YDR216w	YKL216w	0.00491704
YBL008w	YBR096w				YDR216w	YKL217w	0.84596
YBL008w	YBR097w				YDR216w	YKR009c	0.718032
YBL008w	YBR163w				YDR216w	YKR024c	0.48936
YBL008w	YDL001w				YDR216w	YKR067w	0.568432
YBL008w	YDR086c				YDR216w	YKR075c	0.704331
YBL008w	YDR125c				YDR216w	YKR080w	0.0574073
YBL008w	YDR224c				YDR216w	YKR093w	0.581495
YBL008w	YDR225w				YDR216w	YLL011w	0.469257
YBL008w	YDR292c				YDR216w	YLR009w	0.530488
YBL008w	YDR418w				YDR216w	YLR044c	0.792871
YBL008w	YDR523c				YDR216w	YLR064w	0.134559
YBL008w	YEL001c				YDR216w	YLR126c	0.428715
YBL008w	YEL002c				YDR216w	YLR134w	0.785599
YBL008w	YEL022w				YDR216w	YLR149c	0.277184
YBL008w	YEL023c				YDR216w	YLR151c	0.503842
YBL008w	YFR001w				YDR216w	YLR155c	0.0168917
YBL008w	YGL164c				YDR216w	YLR163c	0.209403
YBL008w	YGR003w				YDR216w	YLR178c	0.138868
YBL008w	YGR026w				YDR216w	YLR216c	0.255036
YBL008w	YGR059w				YDR216w	YLR220w	0.46259
YBL008w	YGR187c				YDR216w	YLR222c	0.161404
YBL008w	YHR138c				YDR216w	YLR249w	0.312763
YBL008w	YHR140w				YDR216w	YLR258w	0.214214
YBL008w	YHR155w				YDR216w	YLR266c	0.987933
YBL008w	YJL012c				YDR216w	YLR270w	0.257122
YBL008w	YJR006w				YDR216w	YLR284c	0.0215268
YBL008w	YJR007w				YDR216w	YLR299w	0.535464
YBL008w	YJR044c				YDR216w	YLR324w	0.540983
YBL008w	YKL078w				YDR216w	YLR327c	0.706912
YBL008w	YKL203c				YDR216w	YLR330w	0.91659
YBL008w	YKR010c				YDR216w	YLR348c	0.453956
YBL008w	YKR026c				YDR216w	YLR356w	0.294252
YBL008w	YLL001w				YDR216w	YLR432w	0.553335
YBL008w	YLR002c				YDR216w	YLR438w	0.373839
YBL008w	YLR060w				YDR216w	YML049c	0.264983
YBL008w	YLR061w				YDR216w	YML052w	0.0960037
YBL008w	YLR166c				YDR216w	YML054c	0.959468
YBL008w	YLR225c				YDR216w	YML056c	0.194782
YBL008w	YMR259c				YDR216w	YML058w	0.258727
YBL008w	YNL031c				YDR216w	YML074c	0.480981
YBL008w	YNL048w				YDR216w	YML075c	0.618288
YBL008w	YNL241c				YDR216w	YML100w	0.14983
YBL008w	YOL105c				YDR216w	YML123c	0.658575
YBL008w	YOL144w				YDR216w	YML128c	0.0779183
YBL008w	YOL145c				YDR216w	YML131w	0.761794
YBL008w	YOR003w				YDR216w	YMR011w	0.667956
YBL008w	YOR137c				YDR216w	YMR015c	0.853985
YBL008w	YOR273c				YDR216w	YMR017w	0.73681
YBL008w	YOR274w				YDR216w	YMR018w	0.615637
YBL008w	YOR296w				YDR216w	YMR104c	0.753891
YBL008w	YOR303w				YDR216w	YMR105c	0.222365
YBL008w	YPL018w				YDR216w	YMR107w	0.865096
YBL008w	YPL019c				YDR216w	YMR165c	0.0984419
YBL008w	YPL097w				YDR216w	YMR169c	0.0999069
YBL008w	YPL249c-a				YDR216w	YMR189w	0.912572
YBL008w	YPL253c				YDR216w	YMR195w	0.133881
YBL008w	YPR135w				YDR216w	YMR196w	0.33159
YBL008w	YPR144c				YDR216w	YMR225c	0.507689
YBL021c	YAL062w				YDR216w	YMR229c	0.156267
YBL021c	YBL001c				YDR216w	YMR251w-a	0.223289
YBL021c	YBL030c				YDR216w	YMR266w	0.0810293
YBL021c	YBL044w				YDR216w	YMR269w	0.0493096
YBL021c	YBL045c				YDR216w	YMR303c	0.193611
YBL021c	YBL099w				YDR216w	YMR304w	0.353776
YBL021c	YBR014c				YDR216w	YMR313c	0.0531827
YBL021c	YBR025c				YDR216w	YMR323w	0.966366
YBL021c	YBR038w				YDR216w	YNL009w	0.735902
YBL021c	YBR039w				YDR216w	YNL012w	0.156043
YBL021c	YBR167c				YDR216w	YNL036w	0.468009
YBL021c	YBR168w				YDR216w	YNL061w	0.16561
YBL021c	YBR216c				YDR216w	YNL078w	0.72461
YBL021c	YBR217w				YDR216w	YNL087w	0.203334
YBL021c	YBR243c				YDR216w	YNL100w	0.16778
YBL021c	YBR244w				YDR216w	YNL122c	0.118994
YBL021c	YBR275c				YDR216w	YNL124w	0.224076
YBL021c	YCR028c				YDR216w	YNL130c	0.118415
YBL021c	YCR105w				YDR216w	YNL141w	0.542896
YBL021c	YDL066w				YDR216w	YNL182c	0.266278
YBL021c	YDL067c				YDR216w	YNL186w	0.0955875
YBL021c	YDL149w				YDR216w	YNL194c	0.475548
YBL021c	YDL170w				YDR216w	YNL196c	0.572521
YBL021c	YDL171c				YDR216w	YNL202w	0.347648
YBL021c	YDL174c				YDR216w	YNL237w	0.607696
YBL021c	YDL181w				YDR216w	YNL239w	0.404887
YBL021c	YDL205c				YDR216w	YNL241c	0.694054
YBL021c	YDL230w				YDR216w	YNL270c	0.945927
YBL021c	YDR030c				YDR216w	YNL305c	0.729402
YBL021c	YDR031w				YDR216w	YNL309w	0.994944
YBL021c	YDR042c				YDR216w	YNR006w	0.386515
YBL021c	YDR146c				YDR216w	YNR028w	0.527561
YBL021c	YDR148c				YDR216w	YNR046w	0.929926
YBL021c	YDR178w				YDR216w	YNR050c	0.0663061
YBL021c	YDR183w				YDR216w	YNR056c	0.527903
YBL021c	YDR232w				YDR216w	YNR064c	0.451024
YBL021c	YDR282c				YDR216w	YNR072w	0.0921247
YBL021c	YDR292c				YDR216w	YOL019w	0.414521
YBL021c	YDR298c				YDR216w	YOL052c-a	0.483873
YBL021c	YDR299w				YDR216w	YOL086c	0.922033
YBL021c	YDR372c				YDR216w	YOL115w	0.211522
YBL021c	YDR373w				YDR216w	YOL124c	0.257909
YBL021c	YDR376w				YDR216w	YOL147c	0.595236
YBL021c	YDR377w				YDR216w	YOL155c	0.379097
YBL021c	YDR453c				YDR216w	YOR017w	0.885842
YBL021c	YDR473c				YDR216w	YOR027w	0.65412
YBL021c	YDR495c				YDR216w	YOR032c	0.282049
YBL021c	YDR522c				YDR216w	YOR040w	0.182521
YBL021c	YDR529c				YDR216w	YOR056c	0.19994
YBL021c	YEL024w				YDR216w	YOR057w	0.343919
YBL021c	YEL025c				YDR216w	YOR084w	0.315641
YBL021c	YER048w-a				YDR216w	YOR100c	0.827994
YBL021c	YER100w				YDR216w	YOR108w	0.0795164
YBL021c	YER174c				YDR216w	YOR134w	0.385963
YBL021c	YER175c				YDR216w	YOR142w	0.788446
YBL021c	YER176w				YDR216w	YOR161c	0.132393
YBL021c	YFL018c				YDR216w	YOR178c	0.164851
YBL021c	YFR022w				YDR216w	YOR180c	0.616743
YBL021c	YFR023w				YDR216w	YOR206w	0.255872
YBL021c	YGL001c				YDR216w	YOR220w	0.488903
YBL021c	YGL079w				YDR216w	YOR245c	0.691364
YBL021c	YGL133w				YDR216w	YOR273c	0.462407
YBL021c	YGL134w				YDR216w	YOR294w	0.697652
YBL021c	YGL159w				YDR216w	YOR302w	0.258059
YBL021c	YGL187c				YDR216w	YOR313c	0.421062
YBL021c	YGL191w				YDR216w	YOR317w	0.594121
YBL021c	YGL195w				YDR216w	YOR340c	0.588329
YBL021c	YGL196w				YDR216w	YOR341w	0.0841251
YBL021c	YGR059w				YDR216w	YOR348c	0.419037
YBL021c	YGR183c				YDR216w	YOR363c	0.999238
YBL021c	YGR187c				YDR216w	YOR368w	0.656566
YBL021c	YGR234w				YDR216w	YOR374w	0.383746
YBL021c	YHR001w				YDR216w	YOR378w	0.25525
YBL021c	YHR001w-a				YDR216w	YOR388c	0.00490221
YBL021c	YHR008c				YDR216w	YOR389w	0.90218
YBL021c	YHR044c				YDR216w	YPL018w	0.632901
YBL021c	YHR050w				YDR216w	YPL019c	0.673703
YBL021c	YHR050w-a				YDR216w	YPL020c	0.935671
YBL021c	YHR051w				YDR216w	YPL033c	0.0689299
YBL021c	YHR190w				YDR216w	YPL036w	0.0398303
YBL021c	YHR193c				YDR216w	YPL043w	0.0576005
YBL021c	YHR194w				YDR216w	YPL051w	0.892473
YBL021c	YIL003w				YDR216w	YPL061w	0.873704
YBL021c	YIL125w				YDR216w	YPL092w	0.273654
YBL021c	YIL155c				YDR216w	YPL113c	0.887957
YBL021c	YJL060w				YDR216w	YPL123c	0.1781
YBL021c	YJL061w				YDR216w	YPL135w	0.0600118
YBL021c	YJL145w				YDR216w	YPL147w	0.22677
YBL021c	YJL146w				YDR216w	YPL148c	0.646996
YBL021c	YJL148w				YDR216w	YPL164c	0.793765
YBL021c	YJL166w				YDR216w	YPL187w	0.817465
YBL021c	YJL207c				YDR216w	YPL200w	0.76625
YBL021c	YJR048w				YDR216w	YPL201c	0.367327
YBL021c	YJR077c				YDR216w	YPL216w	0.219571
YBL021c	YJR078w				YDR216w	YPL230w	0.531266
YBL021c	YJR079w				YDR216w	YPL249c-a	0.891482
YBL021c	YJR082c				YDR216w	YPL250c	0.0568172
YBL021c	YJR100c				YDR216w	YPL253c	0.841136
YBL021c	YJR121w				YDR216w	YPL265w	0.404678
YBL021c	YKL015w				YDR216w	YPR001w	0.643786
YBL021c	YKL016c				YDR216w	YPR002w	0.150491
YBL021c	YKL040c				YDR216w	YPR006c	0.166066
YBL021c	YKL072w				YDR216w	YPR010c	0.129084
YBL021c	YKL073w				YDR216w	YPR118w	0.22276
YBL021c	YKL078w				YDR216w	YPR133w-a	0.670405
YBL021c	YKL141w				YDR216w	YPR149w	0.889188
YBL021c	YKL148c				YDR216w	YPR151c	0.639215
YBL021c	YKL217w				YDR216w	YPR152c	0.295242
YBL021c	YKL220c				YDR216w	YPR160w	0.28516
YBL021c	YLL026w				YDR423c	YAL005c	0.844646
YBL021c	YLL027w				YDR423c	YAL011w	0.675416
YBL021c	YLL028w				YDR423c	YAL013w	0.434401
YBL021c	YLL034c				YDR423c	YAL014c	0.579714
YBL021c	YLL039c				YDR423c	YAL015c	0.450118
YBL021c	YLR038c				YDR423c	YAL025c	0.177221
YBL021c	YLR168c				YDR423c	YAL037w	0.754258
YBL021c	YLR219w				YDR423c	YAL039c	0.0450024
YBL021c	YLR220w				YDR423c	YAL044c	0.355534
YBL021c	YLR238w				YDR423c	YAL061w	0.30746
YBL021c	YLR295c				YDR423c	YAL062w	0.205617
YBL021c	YLR304c				YDR423c	YAL063c	0.174599
YBL021c	YLR395c				YDR423c	YAR009c	0.379742
YBL021c	YML007w				YDR423c	YAR015w	0.522935
YBL021c	YML054c				YDR423c	YBL008w	0.969209
YBL021c	YML088w				YDR423c	YBL009w	0.626447
YBL021c	YML091c				YDR423c	YBL018c	0.308542
YBL021c	YML119w				YDR423c	YBL021c	0.445596
YBL021c	YML120c				YDR423c	YBL022c	0.385039
YBL021c	YMR064w				YDR423c	YBL029c-a	0.208274
YBL021c	YMR065w				YDR423c	YBL029w	0.50528
YBL021c	YMR126c				YDR423c	YBL034c	0.860555
YBL021c	YMR133w				YDR423c	YBL042c	0.141821
YBL021c	YMR194w				YDR423c	YBL049w	0.261207
YBL021c	YMR211w				YDR423c	YBL054w	0.462945
YBL021c	YMR256c				YDR423c	YBL058w	0.697253
YBL021c	YMR258c				YDR423c	YBL061c	0.401764
YBL021c	YMR280c				YDR423c	YBL064c	0.109277
YBL021c	YNL009w				YDR423c	YBL093c	0.658941
YBL021c	YNL010w				YDR423c	YBL098w	0.282018
YBL021c	YNL037c				YDR423c	YBL113c	0.444355
YBL021c	YNL052w				YDR423c	YBR008c	0.989919
YBL021c	YNR001c				YDR423c	YBR018c	0.80175
YBL021c	YNR004w				YDR423c	YBR046c	0.618409
YBL021c	YNR054c				YDR423c	YBR056w	0.461735
YBL021c	YOL024w				YDR423c	YBR072w	0.693015
YBL021c	YOL091w				YDR423c	YBR074w	0.299271
YBL021c	YOL105c				YDR423c	YBR102c	0.332258
YBL021c	YOR064c				YDR423c	YBR103w	0.433933
YBL021c	YOR065w				YDR423c	YBR117c	0.415613
YBL021c	YOR111w				YDR423c	YBR126c	0.277925
YBL021c	YOR136w				YDR423c	YBR147w	0.391053
YBL021c	YOR154w				YDR423c	YBR153w	0.0419353
YBL021c	YOR257w				YDR423c	YBR157c	0.0287169
YBL021c	YOR268c				YDR423c	YBR169c	0.190602
YBL021c	YOR269w				YDR423c	YBR203w	0.360828
YBL021c	YOR375c				YDR423c	YBR241c	0.954778
YBL021c	YPL018w				YDR423c	YBR273c	0.743888
YBL021c	YPL019c				YDR423c	YBR280c	0.323041
YBL021c	YPL207w				YDR423c	YBR285w	0.356187
YBL021c	YPL208w				YDR423c	YBR295w	0.393608
YBL021c	YPL270w				YDR423c	YBR296c	0.492036
YBL021c	YPL271w				YDR423c	YCL002c	0.846265
YBL021c	YPR020w				YDR423c	YCL026c-a	0.0695649
YBL021c	YPR145w				YDR423c	YCR037c	0.0111618
YBL021c	YPR190c				YDR423c	YCR043c	0.0149326
YBL021c	YPR191w				YDR423c	YDL021w	0.476139
YBL021c	YPR198w				YDR423c	YDL085w	0.0645377
YBL103c	YAL029c				YDR423c	YDL099w	0.648743
YBL103c	YAL061w				YDR423c	YDL100c	0.268481
YBL103c	YAL062w				YDR423c	YDL110c	0.195114
YBL103c	YBL042c				YDR423c	YDL204w	0.377788
YBL103c	YBL043w				YDR423c	YDL219w	0.114803
YBL103c	YBL079w				YDR423c	YDL222c	0.670659
YBL103c	YBR104w				YDR423c	YDL223c	0.305775
YBL103c	YBR163w				YDR423c	YDL239c	0.303558
YBL103c	YBR167c				YDR423c	YDR001c	0.314332
YBL103c	YBR247c				YDR423c	YDR009w	0.793971
YBL103c	YCL025c				YDR423c	YDR011w	0.663539
YBL103c	YCR005c				YDR423c	YDR034w-b	0.0365573
YBL103c	YCR019w				YDR423c	YDR036c	0.096544
YBL103c	YCR020c-a				YDR423c	YDR074w	0.279431
YBL103c	YCR020w-b				YDR423c	YDR086c	0.498141
YBL103c	YCR021c				YDR423c	YDR089w	0.0271558
YBL103c	YCR090c				YDR423c	YDR091c	0.591572
YBL103c	YCR095c				YDR423c	YDR107c	0.404672
YBL103c	YCR096c				YDR423c	YDR132c	0.282255
YBL103c	YCR097w				YDR423c	YDR135c	0.765971
YBL103c	YCR105w				YDR423c	YDR137w	0.508727
YBL103c	YCR107w				YDR423c	YDR152w	0.073715
YBL103c	YDL001w				YDR423c	YDR171w	0.193481
YBL103c	YDL013w				YDR423c	YDR197w	0.241538
YBL103c	YDL018c				YDR423c	YDR213w	0.890754
YBL103c	YDL044c				YDR423c	YDR224c	0.532831
YBL103c	YDL066w				YDR423c	YDR272w	0.416513
YBL103c	YDL067c				YDR423c	YDR302w	0.90333
YBL103c	YDL110c				YDR423c	YDR322c-a	0.208631
YBL103c	YDL176w				YDR423c	YDR328c	0.29183
YBL103c	YDL182w				YDR423c	YDR348c	0.125367
YBL103c	YDR041w				YDR423c	YDR354w	0.768856
YBL103c	YDR042c				YDR423c	YDR370c	0.734281
YBL103c	YDR043c				YDR423c	YDR384c	0.612198
YBL103c	YDR067c				YDR423c	YDR398w	0.155599
YBL103c	YDR068w				YDR423c	YDR399w	0.497819
YBL103c	YDR077w				YDR423c	YDR423c	0.523629
YBL103c	YDR078c				YDR423c	YDR441c	0.530367
YBL103c	YDR079w				YDR423c	YDR449c	0.342152
YBL103c	YDR084c				YDR423c	YDR450w	0.43327
YBL103c	YDR127w				YDR423c	YDR459c	0.697123
YBL103c	YDR131c				YDR423c	YDR523c	0.146187
YBL103c	YDR146c				YDR423c	YDR533c	0.335955
YBL103c	YDR171w				YDR423c	YEL016c	0.223598
YBL103c	YDR179c				YDR423c	YEL044w	0.117075
YBL103c	YDR179w-a				YDR423c	YEL046c	0.26313
YBL103c	YDR279w				YDR423c	YEL064c	0.800566
YBL103c	YDR314c				YDR423c	YEL071w	0.257395
YBL103c	YDR317w				YDR423c	YER006w	0.238635
YBL103c	YDR385w				YDR423c	YER029c	0.280956
YBL103c	YDR406w				YDR423c	YER030w	0.378904
YBL103c	YDR457w				YDR423c	YER038c	0.858977
YBL103c	YDR473c				YDR423c	YER045c	0.880655
YBL103c	YDR482c				YDR423c	YER046w	0.858855
YBL103c	YDR483w				YDR423c	YER060w-a	0.795248
YBL103c	YDR494w				YDR423c	YER069w	0.562186
YBL103c	YDR508c				YDR423c	YER094c	0.202675
YBL103c	YDR510w				YDR423c	YER100w	0.4048
YBL103c	YDR519w				YDR423c	YER103w	0.812065
YBL103c	YDR522c				YDR423c	YER124c	0.395025
YBL103c	YDR534c				YDR423c	YER132c	0.332853
YBL103c	YEL050c				YDR423c	YER140w	0.212184
YBL103c	YEL071w				YDR423c	YER158c	0.536747
YBL103c	YEL072w				YDR423c	YER161c	0.600347
YBL103c	YER001w				YDR423c	YER163c	0.0225344
YBL103c	YER002w				YDR423c	YFL013c	0.56848
YBL103c	YER013w				YDR423c	YFL014w	0.912599
YBL103c	YER044c-a				YDR423c	YFL016c	0.299619
YBL103c	YER069w				YDR423c	YFL023w	0.214148
YBL103c	YER110c				YDR423c	YFL025c	0.209321
YBL103c	YER126c				YDR423c	YFL027c	0.413481
YBL103c	YER128w				YDR423c	YFL030w	0.577138
YBL103c	YER129w				YDR423c	YFL042c	0.604906
YBL103c	YER158c				YDR423c	YFL052w	0.00289826
YBL103c	YFR008w				YDR423c	YFL053w	0.816223
YBL103c	YFR017c				YDR423c	YFR001w	0.698692
YBL103c	YFR022w				YDR423c	YFR024c-a	0.513031
YBL103c	YGL001c				YDR423c	YFR037c	0.732696
YBL103c	YGL009c				YDR423c	YGL011c	0.142631
YBL103c	YGL159w				YDR423c	YGL029w	0.234373
YBL103c	YGL255w				YDR423c	YGL043w	0.301679
YBL103c	YGR043c				YDR423c	YGL116w	0.826725
YBL103c	YGR071c				YDR423c	YGL117w	0.359834
YBL103c	YGR072w				YDR423c	YGL128c	0.595446
YBL103c	YGR142w				YDR423c	YGL156w	0.449012
YBL103c	YGR188c				YDR423c	YGL157w	0.521935
YBL103c	YGR218w				YDR423c	YGL158w	0.874907
YBL103c	YGR254w				YDR423c	YGL169w	0.519785
YBL103c	YGR271w				YDR423c	YGL234w	0.0599201
YBL103c	YGR272c				YDR423c	YGL254w	0.218847
YBL103c	YGR286c				YDR423c	YGR002c	0.884742
YBL103c	YHL030w				YDR423c	YGR005c	0.336333
YBL103c	YHR018c				YDR423c	YGR009c	0.545441
YBL103c	YHR037w				YDR423c	YGR036c	0.267349
YBL103c	YHR051w				YDR423c	YGR043c	0.696017
YBL103c	YHR081w				YDR423c	YGR052w	0.699782
YBL103c	YHR104w				YDR423c	YGR067c	0.776734
YBL103c	YHR136c				YDR423c	YGR079w	0.501681
YBL103c	YHR156c				YDR423c	YGR088w	0.513693
YBL103c	YHR161c				YDR423c	YGR090w	0.25196
YBL103c	YHR162w				YDR423c	YGR098c	0.185753
YBL103c	YIL037c				YDR423c	YGR108w	0.2786
YBL103c	YIL045w				YDR423c	YGR117c	0.251138
YBL103c	YIL056w				YDR423c	YGR122w	0.411537
YBL103c	YIL136w				YDR423c	YGR130c	0.471441
YBL103c	YIR029w				YDR423c	YGR136w	0.228396
YBL103c	YJL023c				YDR423c	YGR149w	0.481206
YBL103c	YJL031c				YDR423c	YGR168c	0.789885
YBL103c	YJL088w				YDR423c	YGR171c	0.0398583
YBL103c	YJL144w				YDR423c	YGR201c	0.266809
YBL103c	YJL204c				YDR423c	YGR209c	0.10429
YBL103c	YJL217w				YDR423c	YGR222w	0.427282
YBL103c	YJR011c				YDR423c	YGR233c	0.917549
YBL103c	YJR109c				YDR423c	YGR234w	0.202402
YBL103c	YJR110w				YDR423c	YGR236c	0.463115
YBL103c	YJR148w				YDR423c	YGR237c	0.570119
YBL103c	YKL067w				YDR423c	YGR238c	0.0469096
YBL103c	YKL071w				YDR423c	YGR239c	0.232166
YBL103c	YKL179c				YDR423c	YGR248w	0.213977
YBL103c	YKL216w				YDR423c	YGR249w	0.193614
YBL103c	YKL219w				YDR423c	YGR256w	0.40354
YBL103c	YKL220c				YDR423c	YHL021c	0.917794
YBL103c	YKL221w				YDR423c	YHL034c	0.136997
YBL103c	YKR004c				YDR423c	YHL035c	0.76067
YBL103c	YKR009c				YDR423c	YHL039w	0.147297
YBL103c	YKR039w				YDR423c	YHL040c	0.836073
YBL103c	YKR056w				YDR423c	YHR007c	0.342077
YBL103c	YKR075c				YDR423c	YHR008c	0.572695
YBL103c	YKR089c				YDR423c	YHR016c	0.38995
YBL103c	YKR102w				YDR423c	YHR018c	0.467323
YBL103c	YLL001w				YDR423c	YHR029c	0.393887
YBL103c	YLL004w				YDR423c	YHR047c	0.407742
YBL103c	YLL005c				YDR423c	YHR049w	0.977476
YBL103c	YLL015w				YDR423c	YHR053c	0.516406
YBL103c	YLL055w				YDR423c	YHR077c	0.420913
YBL103c	YLR009w				YDR423c	YHR088w	0.0836131
YBL103c	YLR049c				YDR423c	YHR091c	0.31437
YBL103c	YLR082c				YDR423c	YHR096c	0.161489
YBL103c	YLR107w				YDR423c	YHR097c	0.132458
YBL103c	YLR113w				YDR423c	YHR103w	0.554895
YBL103c	YLR130c				YDR423c	YHR107c	0.979351
YBL103c	YLR136c				YDR423c	YHR111w	0.528112
YBL103c	YLR141w				YDR423c	YHR123w	0.316218
YBL103c	YLR142w				YDR423c	YHR128w	0.589435
YBL103c	YLR258w				YDR423c	YHR133c	0.976275
YBL103c	YLR266c				YDR423c	YHR137w	0.407037
YBL103c	YLR267w				YDR423c	YHR146w	0.577045
YBL103c	YLR276c				YDR423c	YHR204w	0.196731
YBL103c	YLR304c				YDR423c	YHR205w	0.862075
YBL103c	YLR316c				YDR423c	YHR210c	0.0729119
YBL103c	YLR318w				YDR423c	YIL045w	0.839455
YBL103c	YLR327c				YDR423c	YIL066c	0.491963
YBL103c	YLR346c				YDR423c	YIL069c	0.982154
YBL103c	YLR397c				YDR423c	YIL091c	0.327232
YBL103c	YML110c				YDR423c	YIL098c	0.00550245
YBL103c	YML123c				YDR423c	YIL118w	0.852132
YBL103c	YMR019w				YDR423c	YIL119c	0.157876
YBL103c	YMR098c				YDR423c	YIL127c	0.301719
YBL103c	YMR178w				YDR423c	YIL136w	0.702314
YBL103c	YMR192w				YDR423c	YIL155c	0.638237
YBL103c	YMR193w				YDR423c	YIR019c	0.278126
YBL103c	YMR227c				YDR423c	YIR021w	0.403258
YBL103c	YMR228w				YDR423c	YJL029c	0.352479
YBL103c	YMR251w-a				YDR423c	YJL077c	0.548777
YBL103c	YMR258c				YDR423c	YJL088w	0.647581
YBL103c	YNL001w				YDR423c	YJL100w	0.348707
YBL103c	YNL002c				YDR423c	YJL101c	0.211893
YBL103c	YNL010w				YDR423c	YJL116c	0.455528
YBL103c	YNL036w				YDR423c	YJL170c	0.875918
YBL103c	YNL037c				YDR423c	YJL171c	0.472952
YBL103c	YNL134c				YDR423c	YJL198w	0.470507
YBL103c	YNR001c				YDR423c	YJR011c	0.337179
YBL103c	YNR017w				YDR423c	YJR013w	0.973521
YBL103c	YNR053c				YDR423c	YJR044c	0.256555
YBL103c	YOL001w				YDR423c	YJR049c	0.936351
YBL103c	YOL145c				YDR423c	YJR096w	0.489181
YBL103c	YOL159c				YDR423c	YJR115w	0.734774
YBL103c	YOR032c				YDR423c	YJR132w	0.176094
YBL103c	YOR107w				YDR423c	YKL002w	0.791406
YBL103c	YOR136w				YDR423c	YKL029c	0.172093
YBL103c	YOR148c				YDR423c	YKL033w	0.9174
YBL103c	YOR153w				YDR423c	YKL039w	0.577881
YBL103c	YOR302w				YDR423c	YKL040c	0.933397
YBL103c	YOR303w				YDR423c	YKL060c	0.881989
YBL103c	YOR306c				YDR423c	YKL071w	0.575227
YBL103c	YPL012w				YDR423c	YKL086w	0.397142
YBL103c	YPL054w				YDR423c	YKL087c	0.307847
YBL103c	YPL093w				YDR423c	YKL093w	0.987482
YBL103c	YPL111w				YDR423c	YKL101w	0.18551
YBL103c	YPL124w				YDR423c	YKL103c	0.525268
YBL103c	YPL125w				YDR423c	YKL107w	0.327781
YBL103c	YPL135w				YDR423c	YKL120w	0.497819
YBL103c	YPL137c				YDR423c	YKL132c	0.169922
YBL103c	YPL268w				YDR423c	YKL154w	0.332064
YBL103c	YPR001w				YDR423c	YKL155c	0.348787
YBL103c	YPR002w				YDR423c	YKL163w	0.120758
YBL103c	YPR040w				YDR423c	YKL216w	0.00491704
YBL103c	YPR119w				YDR423c	YKR027w	0.814675
YBL103c	YPR198w				YDR423c	YKR039w	0.224672
YBR049c	YAL030w				YDR423c	YKR049c	0.0875753
YBR049c	YAL031c				YDR423c	YKR052c	0.62778
YBR049c	YAL038w				YDR423c	YKR071c	0.317205
YBR049c	YAL054c				YDR423c	YKR080w	0.0574073
YBR049c	YBL013w				YDR423c	YKR081c	0.355906
YBR049c	YBL014c				YDR423c	YKR097w	0.401792
YBR049c	YBL058w				YDR423c	YLL019c	0.283499
YBR049c	YBL059c-a				YDR423c	YLL025w	0.918402
YBR049c	YBL059w				YDR423c	YLL054c	0.179765
YBR049c	YBR019c				YDR423c	YLL058w	0.739655
YBR049c	YBR020w				YDR423c	YLL060c	0.296675
YBR049c	YBR049c				YDR423c	YLR022c	0.5658
YBR049c	YBR095c				YDR423c	YLR043c	0.284776
YBR049c	YBR096w				YDR423c	YLR047c	0.577024
YBR049c	YBR164c				YDR423c	YLR053c	0.970512
YBR049c	YBR170c				YDR423c	YLR058c	0.0803324
YBR049c	YBR171w				YDR423c	YLR072w	0.813206
YBR049c	YBR222c				YDR423c	YLR081w	0.268996
YBR049c	YBR236c				YDR423c	YLR090w	0.0599316
YBR049c	YBR237w				YDR423c	YLR106c	0.00101589
YBR049c	YCR012w				YDR423c	YLR108c	0.196655
YBR049c	YCR032w				YDR423c	YLR109w	0.301457
YBR049c	YCR042c				YDR423c	YLR121c	0.234672
YBR049c	YCR093w				YDR423c	YLR125w	0.372216
YBR049c	YCR094w				YDR423c	YLR126c	0.428715
YBR049c	YDL045w-a				YDR423c	YLR177w	0.534225
YBR049c	YDL046w				YDR423c	YLR178c	0.138868
YBR049c	YDL102w				YDR423c	YLR192c	0.010937
YBR049c	YDL137w				YDR423c	YLR214w	0.837249
YBR049c	YDL138w				YDR423c	YLR222c	0.161404
YBR049c	YDL140c				YDR423c	YLR251w	0.235295
YBR049c	YDL155w				YDR423c	YLR257w	0.941002
YBR049c	YDL161w				YDR423c	YLR327c	0.706912
YBR049c	YDL164c				YDR423c	YLR359w	0.0103691
YBR049c	YDL186w				YDR423c	YLR397c	0.10477
YBR049c	YDL188c				YDR423c	YLR420w	0.718776
YBR049c	YDL212w				YDR423c	YLR448w	0.859371
YBR049c	YDL213c				YDR423c	YLR455w	0.637323
YBR049c	YDL225w				YDR423c	YLR456w	0.336829
YBR049c	YDL226c				YDR423c	YML030w	0.0660518
YBR049c	YDL233w				YDR423c	YML032c	0.298982
YBR049c	YDR003w				YDR423c	YML052w	0.0960037
YBR049c	YDR028c				YDR423c	YML054c	0.959468
YBR049c	YDR030c				YDR423c	YML070w	0.779788
YBR049c	YDR036c				YDR423c	YML092c	0.4929
YBR049c	YDR037w				YDR423c	YML100w	0.14983
YBR049c	YDR050c				YDR423c	YML116w	0.994079
YBR049c	YDR146c				YDR423c	YML121w	0.74931
YBR049c	YDR155c				YDR423c	YML123c	0.658575
YBR049c	YDR156w				YDR423c	YML128c	0.0779183
YBR049c	YDR158w				YDR423c	YMR011w	0.667956
YBR049c	YDR257c				YDR423c	YMR038c	0.857612
YBR049c	YDR313c				YDR423c	YMR044w	0.786052
YBR049c	YDR322c-a				YDR423c	YMR062c	0.820813
YBR049c	YDR323c				YDR423c	YMR079w	0.663572
YBR049c	YDR328c				YDR423c	YMR081c	0.569872
YBR049c	YDR457w				YDR423c	YMR090w	0.211761
YBR049c	YDR465c				YDR423c	YMR096w	0.23019
YBR049c	YDR466w				YDR423c	YMR105c	0.222365
YBR049c	YEL012w				YDR423c	YMR113w	0.695717
YBR049c	YEL013w				YDR423c	YMR120c	0.751729
YBR049c	YEL022w				YDR423c	YMR134w	0.534978
YBR049c	YEL023c				YDR423c	YMR169c	0.0999069
YBR049c	YER012w				YDR423c	YMR175w	0.681204
YBR049c	YER013w				YDR423c	YMR189w	0.912572
YBR049c	YER025w				YDR423c	YMR194w	0.836667
YBR049c	YER039c				YDR423c	YMR196w	0.33159
YBR049c	YER039c-a				YDR423c	YMR220w	0.824862
YBR049c	YER040w				YDR423c	YMR230w	0.93107
YBR049c	YER048w-a				YDR423c	YMR250w	0.305152
YBR049c	YER049w				YDR423c	YMR251w	0.513153
YBR049c	YER068w				YDR423c	YMR261c	0.5359
YBR049c	YER069w				YDR423c	YMR263w	0.167384
YBR049c	YER086w				YDR423c	YMR300c	0.82615
YBR049c	YER105c				YDR423c	YMR301c	0.131559
YBR049c	YER106w				YDR423c	YMR315w	0.101702
YBR049c	YER156c				YDR423c	YMR319c	0.540108
YBR049c	YER157w				YDR423c	YNL014w	0.35606
YBR049c	YFL005w				YDR423c	YNL023c	0.200291
YBR049c	YFL007w				YDR423c	YNL035c	0.79663
YBR049c	YFL023w				YDR423c	YNL036w	0.468009
YBR049c	YFL024c				YDR423c	YNL062c	0.430943
YBR049c	YFL039c				YDR423c	YNL077w	0.0958306
YBR049c	YFR050c				YDR423c	YNL079c	0.351753
YBR049c	YGL026c				YDR423c	YNL084c	0.922981
YBR049c	YGL068w				YDR423c	YNL087w	0.203334
YBR049c	YGL070c				YDR423c	YNL097c	0.976838
YBR049c	YGL089c				YDR423c	YNL103w	0.670165
YBR049c	YGL119w				YDR423c	YNL111c	0.641262
YBR049c	YGL120c				YDR423c	YNL115c	0.463523
YBR049c	YGL151w				YDR423c	YNL122c	0.118994
YBR049c	YGL159w				YDR423c	YNL134c	0.417637
YBR049c	YGL181w				YDR423c	YNL141w	0.542896
YBR049c	YGL183c				YDR423c	YNL148c	0.889006
YBR049c	YGL191w				YDR423c	YNL163c	0.366056
YBR049c	YGL192w				YDR423c	YNL173c	0.0607133
YBR049c	YGL198w				YDR423c	YNL178w	0.86863
YBR049c	YGL200c				YDR423c	YNL180c	0.112162
YBR049c	YGL237c				YDR423c	YNL207w	0.134365
YBR049c	YGL238w				YDR423c	YNL220w	0.525087
YBR049c	YGL240w				YDR423c	YNL229c	0.275991
YBR049c	YGL244w				YDR423c	YNL274c	0.46863
YBR049c	YGL245w				YDR423c	YNL279w	0.611942
YBR049c	YGR012w				YDR423c	YNL294c	0.539667
YBR049c	YGR078c				YDR423c	YNL308c	0.695266
YBR049c	YGR079w				YDR423c	YNL328c	0.267118
YBR049c	YGR147c				YDR423c	YNR009w	0.655788
YBR049c	YGR179c				YDR423c	YNR027w	0.166612
YBR049c	YGR184c				YDR423c	YNR033w	0.714229
YBR049c	YGR192c				YDR423c	YNR034w	0.265853
YBR049c	YGR231c				YDR423c	YNR034w-a	0.706149
YBR049c	YGR232w				YDR423c	YNR045w	0.697921
YBR049c	YGR235c				YDR423c	YNR049c	0.704452
YBR049c	YGR241c				YDR423c	YNR051c	0.260762
YBR049c	YGR243w				YDR423c	YNR053c	0.408447
YBR049c	YGR254w				YDR423c	YNR056c	0.527903
YBR049c	YGR271c-a				YDR423c	YNR062c	0.755942
YBR049c	YHL031c				YDR423c	YOL052c-a	0.483873
YBR049c	YHR025w				YDR423c	YOL077c	0.55497
YBR049c	YHR026w				YDR423c	YOL107w	0.00486013
YBR049c	YHR039c-a				YDR423c	YOL112w	0.0552992
YBR049c	YHR040w				YDR423c	YOL119c	0.45542
YBR049c	YHR146w				YDR423c	YOL140w	0.798295
YBR049c	YIL022w				YDR423c	YOL156w	0.987733
YBR049c	YIL023c				YDR423c	YOR007c	0.720664
YBR049c	YIL075c				YDR423c	YOR010c	0.272218
YBR049c	YIL108w				YDR423c	YOR011w	0.825425
YBR049c	YIL109c				YDR423c	YOR034c	0.0804168
YBR049c	YIL112w				YDR423c	YOR036w	0.660224
YBR049c	YIL113w				YDR423c	YOR038c	0.106796
YBR049c	YIL126w				YDR423c	YOR056c	0.19994
YBR049c	YIL148w				YDR423c	YOR106w	0.667474
YBR049c	YIL149c				YDR423c	YOR109w	0.142177
YBR049c	YIR001c				YDR423c	YOR123c	0.215016
YBR049c	YIR002c				YDR423c	YOR128c	0.937102
YBR049c	YIR003w				YDR423c	YOR129c	0.714957
YBR049c	YJL001w				YDR423c	YOR134w	0.385963
YBR049c	YJL002c				YDR423c	YOR153w	0.242981
YBR049c	YJL106w				YDR423c	YOR165w	0.0694339
YBR049c	YJL148w				YDR423c	YOR172w	0.500611
YBR049c	YJL158c				YDR423c	YOR173w	0.242183
YBR049c	YJL196c				YDR423c	YOR184w	0.719164
YBR049c	YJR007w				YDR423c	YOR192c	0.656845
YBR049c	YJR085c				YDR423c	YOR194c	0.749392
YBR049c	YJR086w				YDR423c	YOR202w	0.296781
YBR049c	YJR090c				YDR423c	YOR208w	0.061393
YBR049c	YJR097w				YDR423c	YOR210w	0.838061
YBR049c	YJR098c				YDR423c	YOR223w	0.46426
YBR049c	YJR099w				YDR423c	YOR262w	0.633555
YBR049c	YJR100c				YDR423c	YOR273c	0.462407
YBR049c	YJR122w				YDR423c	YOR285w	0.230454
YBR049c	YKL025c				YDR423c	YOR297c	0.866037
YBR049c	YKL052c				YDR423c	YOR302w	0.258059
YBR049c	YKL058w				YDR423c	YOR303w	0.809636
YBR049c	YKL059c				YDR423c	YOR313c	0.421062
YBR049c	YKL072w				YDR423c	YOR315w	0.793524
YBR049c	YKL073w				YDR423c	YOR323c	0.364832
YBR049c	YKL081w				YDR423c	YOR372c	0.887292
YBR049c	YKL082c				YDR423c	YOR374w	0.383746
YBR049c	YKL104c				YDR423c	YOR381w	0.5138
YBR049c	YKL122c				YDR423c	YOR383c	0.781398
YBR049c	YKL146w				YDR423c	YOR390w	0.922085
YBR049c	YKL148c				YDR423c	YPL051w	0.892473
YBR049c	YKL182w				YDR423c	YPL054w	0.449518
YBR049c	YKL203c				YDR423c	YPL061w	0.873704
YBR049c	YKL220c				YDR423c	YPL081w	0.382482
YBR049c	YKR015c				YDR423c	YPL089c	0.850233
YBR049c	YKR016w				YDR423c	YPL092w	0.273654
YBR049c	YKR068c				YDR423c	YPL096w	0.932746
YBR049c	YKR069w				YDR423c	YPL119c	0.03567
YBR049c	YLL033w				YDR423c	YPL165c	0.304289
YBR049c	YLL034c				YDR423c	YPL171c	0.185147
YBR049c	YLL040c				YDR423c	YPL178w	0.0962748
YBR049c	YLR032w				YDR423c	YPL181w	0.130813
YBR049c	YLR083c				YDR423c	YPL186c	0.137819
YBR049c	YLR110c				YDR423c	YPL241c	0.96613
YBR049c	YLR113w				YDR423c	YPL242c	0.667265
YBR049c	YLR170c				YDR423c	YPL279c	0.70333
YBR049c	YLR223c				YDR423c	YPR004c	0.351624
YBR049c	YLR224w				YDR423c	YPR013c	0.418669
YBR049c	YLR274w				YDR423c	YPR024w	0.319845
YBR049c	YLR378c				YDR423c	YPR034w	0.526793
YBR049c	YLR380w				YDR423c	YPR040w	0.934695
YBR049c	YLR388w				YDR423c	YPR047w	0.212526
YBR049c	YML001w				YDR423c	YPR048w	0.800569
YBR049c	YML002w				YDR423c	YPR049c	0.704283
YBR049c	YML119w				YDR423c	YPR075c	0.0975248
YBR049c	YML120c				YDR423c	YPR081c	0.423189
YBR049c	YML129c				YDR423c	YPR084w	0.0376478
YBR049c	YMR001c				YDR423c	YPR088c	0.657378
YBR049c	YMR019w				YDR423c	YPR128c	0.701834
YBR049c	YMR039c				YDR423c	YPR143w	0.105792
YBR049c	YMR040w				YDR423c	YPR166c	0.4663
YBR049c	YMR047c				YDR423c	YPR169w	0.182585
YBR049c	YMR048w				YDR423c	YPR184w	0.222752
YBR049c	YMR117c				YDR423c	YPR185w	0.667456
YBR049c	YMR121c				YDR423c	YPR194c	0.587657
YBR049c	YMR122w-a				YGL013c	YAL003w	0.785504
YBR049c	YMR182c				YGL013c	YAL022c	0.780818
YBR049c	YMR185w				YGL013c	YAL034w-a	0.444788
YBR049c	YMR186w				YGL013c	YAL061w	0.30746
YBR049c	YMR188c				YGL013c	YAL065c	0.0378447
YBR049c	YMR189w				YGL013c	YAR002w	0.467703
YBR049c	YMR213w				YGL013c	YAR066w	0.208077
YBR049c	YMR214w				YGL013c	YAR068w	0.269273
YBR049c	YMR221c				YGL013c	YAR071w	0.0727751
YBR049c	YMR280c				YGL013c	YBL001c	0.127369
YBR049c	YMR281w				YGL013c	YBL005w	0.023114
YBR049c	YMR311c				YGL013c	YBL006c	0.0433228
YBR049c	YNL001w				YGL013c	YBL028c	0.0850446
YBR049c	YNL008c				YGL013c	YBL029c-a	0.208274
YBR049c	YNL090w				YGL013c	YBL029w	0.50528
YBR049c	YNL091w				YGL013c	YBL036c	0.155637
YBR049c	YNL092w				YGL013c	YBL039c	0.130834
YBR049c	YNL111c				YGL013c	YBL049w	0.261207
YBR049c	YNL113w				YGL013c	YBL064c	0.109277
YBR049c	YNL115c				YGL013c	YBL087c	0.98036
YBR049c	YNL117w				YGL013c	YBL111c	0.0381368
YBR049c	YNL118c				YGL013c	YBL112c	0.405719
YBR049c	YNL157w				YGL013c	YBL113c	0.444355
YBR049c	YNL161w				YGL013c	YBR008c	0.989919
YBR049c	YNL169c				YGL013c	YBR039w	0.577326
YBR049c	YNL216w				YGL013c	YBR040w	0.914044
YBR049c	YNL262w				YGL013c	YBR053c	0.273383
YBR049c	YNL263c				YGL013c	YBR054w	0.376307
YBR049c	YNL284c				YGL013c	YBR057c	0.211363
YBR049c	YNR011c				YGL013c	YBR072w	0.693015
YBR049c	YNR012w				YGL013c	YBR077c	0.582781
YBR049c	YNR013c				YGL013c	YBR078w	0.869314
YBR049c	YNR016c				YGL013c	YBR083w	0.191635
YBR049c	YNR039c				YGL013c	YBR092c	0.775413
YBR049c	YNR040w				YGL013c	YBR093c	0.0634843
YBR049c	YOL004w				YGL013c	YBR126c	0.277925
YBR049c	YOL005c				YGL013c	YBR145w	0.502573
YBR049c	YOL006c				YGL013c	YBR147w	0.391053
YBR049c	YOL144w				YGL013c	YBR157c	0.0287169
YBR049c	YOL145c				YGL013c	YBR158w	0.449036
YBR049c	YOR044w				YGL013c	YBR169c	0.190602
YBR049c	YOR048c				YGL013c	YBR177c	0.999765
YBR049c	YOR074c				YGL013c	YBR183w	0.749285
YBR049c	YOR075w				YGL013c	YBR203w	0.360828
YBR049c	YOR076c				YGL013c	YBR230c	0.0806698
YBR049c	YOR093c				YGL013c	YBR233w-a	0.060863
YBR049c	YOR094w				YGL013c	YBR256c	0.460207
YBR049c	YOR116c				YGL013c	YBR291c	0.0642724
YBR049c	YOR117w				YGL013c	YCL024w	0.10265
YBR049c	YOR120w				YGL013c	YCL025c	0.147514
YBR049c	YOR122c				YGL013c	YCL026c-a	0.0695649
YBR049c	YOR128c				YGL013c	YCL026c-b	0.595152
YBR049c	YOR148c				YGL013c	YCL030c	0.374624
YBR049c	YOR149c				YGL013c	YCL040w	0.721931
YBR049c	YOR150w				YGL013c	YCL042w	0.2569
YBR049c	YOR186w				YGL013c	YCL043c	0.892609
YBR049c	YOR187w				YGL013c	YCL045c	0.0160017
YBR049c	YOR196c				YGL013c	YCL066w	0.645284
YBR049c	YOR198c				YGL013c	YCR005c	0.206399
YBR049c	YOR272w				YGL013c	YCR010c	0.853531
YBR049c	YOR287c				YGL013c	YCR021c	0.41126
YBR049c	YOR319w				YGL013c	YCR053w	0.422751
YBR049c	YOR335c				YGL013c	YCR061w	0.865185
YBR049c	YOR336w				YGL013c	YCR065w	0.727927
YBR049c	YPL078c				YGL013c	YCR087c-a	0.407763
YBR049c	YPL180w				YGL013c	YCR104w	0.207743
YBR049c	YPL181w				YGL013c	YCR105w	0.974579
YBR049c	YPL204w				YGL013c	YCR108c	0.350632
YBR049c	YPL206c				YGL013c	YDL001w	0.279095
YBR049c	YPL212c				YGL013c	YDL014w	0.349668
YBR049c	YPL231w				YGL013c	YDL020c	0.0229968
YBR049c	YPR025c				YGL013c	YDL029w	0.16524
YBR049c	YPR026w				YGL013c	YDL038c	0.728281
YBR049c	YPR029c				YGL013c	YDL048c	0.381032
YBR049c	YPR034w				YGL013c	YDL055c	0.171277
YBR049c	YPR052c				YGL013c	YDL060w	0.316469
YBR049c	YPR054w				YGL013c	YDL063c	0.575671
YBR049c	YPR055w				YGL013c	YDL082w	0.795313
YBR049c	YPR066w				YGL013c	YDL083c	0.747642
YBR049c	YPR067w				YGL013c	YDL108w	0.17956
YBR049c	YPR074c				YGL013c	YDL110c	0.195114
YBR049c	YPR100w				YGL013c	YDL115c	0.108997
YBR049c	YPR101w				YGL013c	YDL124w	0.388622
YBR049c	YPR119w				YGL013c	YDL139c	0.140186
YBR049c	YPR163c				YGL013c	YDL147w	0.0287485
YBR049c	YPR164w				YGL013c	YDL148c	0.400833
YBR049c	YPR181c				YGL013c	YDL159w-a	0.924147
YBR049c	YPR182w				YGL013c	YDL182w	0.836327
YBR066c	YAL034w-a				YGL013c	YDL204w	0.377788
YBR066c	YAR066w				YGL013c	YDL214c	0.944765
YBR066c	YBR018c				YGL013c	YDL216c	0.246842
YBR066c	YBR052c				YGL013c	YDL222c	0.670659
YBR066c	YBR067c				YGL013c	YDL223c	0.305775
YBR066c	YBR069c				YGL013c	YDL244w	0.110388
YBR066c	YBR132c				YGL013c	YDR011w	0.663539
YBR066c	YBR147w				YGL013c	YDR013w	0.560677
YBR066c	YBR156c				YGL013c	YDR034w-b	0.0365573
YBR066c	YCL027w				YGL013c	YDR041w	0.116126
YBR066c	YCR075c				YGL013c	YDR042c	0.700198
YBR066c	YDL004w				YGL013c	YDR043c	0.202704
YBR066c	YDL085c-a				YGL013c	YDR046c	0.292607
YBR066c	YDL091c				YGL013c	YDR047w	0.696359
YBR066c	YDL181w				YGL013c	YDR055w	0.0361048
YBR066c	YDL240w				YGL013c	YDR065w	0.912867
YBR066c	YDR030c				YGL013c	YDR072c	0.965407
YBR066c	YDR031w				YGL013c	YDR073w	0.339188
YBR066c	YDR038c				YGL013c	YDR074w	0.279431
YBR066c	YDR041w				YGL013c	YDR076w	0.204052
YBR066c	YDR070c				YGL013c	YDR077w	0.40318
YBR066c	YDR107c				YGL013c	YDR093w	0.344885
YBR066c	YDR237w				YGL013c	YDR171w	0.193481
YBR066c	YDR277c				YGL013c	YDR234w	0.227864
YBR066c	YDR286c				YGL013c	YDR258c	0.0491899
YBR066c	YDR298c				YGL013c	YDR259c	0.00366197
YBR066c	YDR377w				YGL013c	YDR277c	0.128639
YBR066c	YDR461w				YGL013c	YDR282c	0.0191671
YBR066c	YEL011w				YGL013c	YDR297w	0.595921
YBR066c	YEL024w				YGL013c	YDR332w	0.611764
YBR066c	YEL039c				YGL013c	YDR342c	0.753416
YBR066c	YER047c				YGL013c	YDR345c	0.216024
YBR066c	YER058w				YGL013c	YDR353w	0.274158
YBR066c	YER096w				YGL013c	YDR366c	0.623145
YBR066c	YER170w				YGL013c	YDR367w	0.44798
YBR066c	YFR011c				YGL013c	YDR368w	0.393422
YBR066c	YFR015c				YGL013c	YDR399w	0.497819
YBR066c	YFR053c				YGL013c	YDR406w	0.92829
YBR066c	YGL010w				YGL013c	YDR465c	0.377194
YBR066c	YGL032c				YGL013c	YDR470c	0.205566
YBR066c	YGL143c				YGL013c	YDR471w	0.931914
YBR066c	YGL187c				YGL013c	YDR486c	0.767924
YBR066c	YGL226w				YGL013c	YDR492w	0.265437
YBR066c	YGL255w				YGL013c	YDR510w	0.792289
YBR066c	YGR053c				YGL013c	YDR516c	0.0923828
YBR066c	YGR088w				YGL013c	YDR525w-a	0.0264005
YBR066c	YGR108w				YGL013c	YDR533c	0.335955
YBR066c	YGR110w				YGL013c	YDR534c	0.520127
YBR066c	YGR221c				YGL013c	YEL011w	0.329619
YBR066c	YHL028w				YGL013c	YEL020w-a	0.0434173
YBR066c	YHL033c				YGL013c	YEL024w	0.811946
YBR066c	YHR031c				YGL013c	YEL035c	0.410308
YBR066c	YHR033w				YGL013c	YEL039c	0.768165
YBR066c	YHR043c				YGL013c	YEL044w	0.117075
YBR066c	YHR051w				YGL013c	YEL046c	0.26313
YBR066c	YHR080c				YGL013c	YEL054c	0.877434
YBR066c	YIL001w				YGL013c	YEL060c	0.316368
YBR066c	YIL013c				YGL013c	YEL064c	0.800566
YBR066c	YIL087c				YGL013c	YEL065w	0.512569
YBR066c	YIL098c				YGL013c	YEL071w	0.257395
YBR066c	YIL099w				YGL013c	YER006w	0.238635
YBR066c	YIL101c				YGL013c	YER019c-a	0.394168
YBR066c	YIL113w				YGL013c	YER020w	0.959127
YBR066c	YIL119c				YGL013c	YER037w	0.794565
YBR066c	YIL162w				YGL013c	YER042w	0.660666
YBR066c	YIR032c				YGL013c	YER052c	0.0906593
YBR066c	YJL003w				YGL013c	YER053c	0.369684
YBR066c	YJL078c				YGL013c	YER062c	0.804384
YBR066c	YJL079c				YGL013c	YER064c	0.543269
YBR066c	YJL170c				YGL013c	YER067w	0.238987
YBR066c	YJL196c				YGL013c	YER069w	0.562186
YBR066c	YJL210w				YGL013c	YER072w	0.132181
YBR066c	YJR048w				YGL013c	YER073w	0.784561
YBR066c	YJR121w				YGL013c	YER074w	0.68339
YBR066c	YJR127c				YGL013c	YER079w	0.256848
YBR066c	YJR135c				YGL013c	YER103w	0.812065
YBR066c	YJR153w				YGL013c	YER110c	0.257704
YBR066c	YKL016c				YGL013c	YER116c	0.767484
YBR066c	YKL150w				YGL013c	YER117w	0.769978
YBR066c	YKR083c				YGL013c	YER130c	0.42611
YBR066c	YKR093w				YGL013c	YER145c	0.930475
YBR066c	YLR042c				YGL013c	YER146w	0.329802
YBR066c	YLR411w				YGL013c	YER155c	0.298309
YBR066c	YML054c				YGL013c	YER175c	0.510292
YBR066c	YML081c-a				YGL013c	YER177w	0.676473
YBR066c	YML087c				YGL013c	YFL014w	0.912599
YBR066c	YML091c				YGL013c	YFL023w	0.214148
YBR066c	YML120c				YGL013c	YFL024c	0.48929
YBR066c	YML123c				YGL013c	YFL027c	0.413481
YBR066c	YMR003w				YGL013c	YFL028c	0.100629
YBR066c	YMR031c				YGL013c	YFL034c-a	0.880218
YBR066c	YMR035w				YGL013c	YFR006w	0.933793
YBR066c	YMR058w				YGL013c	YFR017c	0.824122
YBR066c	YMR105c				YGL013c	YFR033c	0.111671
YBR066c	YMR145c				YGL013c	YFR041c	0.725969
YBR066c	YMR157c				YGL013c	YFR053c	0.382991
YBR066c	YMR188c				YGL013c	YGL001c	0.357214
YBR066c	YMR195w				YGL013c	YGL008c	0.928195
YBR066c	YMR244c-a				YGL013c	YGL013c	0.873885
YBR066c	YMR250w				YGL013c	YGL021w	0.668112
YBR066c	YMR252c				YGL013c	YGL028c	0.0179884
YBR066c	YMR256c				YGL013c	YGL036w	0.0876643
YBR066c	YMR286w				YGL013c	YGL037c	0.150074
YBR066c	YNL052w				YGL013c	YGL039w	0.653792
YBR066c	YNL173c				YGL013c	YGL055w	0.713062
YBR066c	YNL200c				YGL013c	YGL062w	0.29022
YBR066c	YNL237w				YGL013c	YGL103w	0.986325
YBR066c	YNL274c				YGL013c	YGL104c	0.397365
YBR066c	YNL279w				YGL013c	YGL116w	0.826725
YBR066c	YNL306w				YGL013c	YGL117w	0.359834
YBR066c	YNR060w				YGL013c	YGL121c	0.419222
YBR066c	YOL042w				YGL013c	YGL156w	0.449012
YBR066c	YOL071w				YGL013c	YGL157w	0.521935
YBR066c	YOL154w				YGL013c	YGL163c	0.290555
YBR066c	YOR049c				YGL013c	YGL171w	0.340671
YBR066c	YOR100c				YGL013c	YGL189c	0.980425
YBR066c	YOR136w				YGL013c	YGL209w	0.879612
YBR066c	YOR161c				YGL013c	YGL224c	0.51549
YBR066c	YOR179c				YGL013c	YGL231c	0.290777
YBR066c	YOR185c				YGL013c	YGL253w	0.45215
YBR066c	YOR187w				YGL013c	YGL259w	0.731234
YBR066c	YOR315w				YGL013c	YGR008c	0.0105312
YBR066c	YOR347c				YGL013c	YGR019w	0.463371
YBR066c	YOR348c				YGL013c	YGR028w	0.695593
YBR066c	YOR349w				YGL013c	YGR035c	0.213257
YBR066c	YOR374w				YGL013c	YGR035w-a	0.209892
YBR066c	YPL004c				YGL013c	YGR043c	0.696017
YBR066c	YPL074w				YGL013c	YGR052w	0.699782
YBR066c	YPL078c				YGL013c	YGR088w	0.513693
YBR066c	YPL113c				YGL013c	YGR103w	0.0978583
YBR066c	YPL134c				YGL013c	YGR108w	0.2786
YBR066c	YPL177c				YGL013c	YGR146c	0.440531
YBR066c	YPL183w-a				YGL013c	YGR159c	0.40548
YBR066c	YPL271w				YGL013c	YGR161c	0.451996
YBR066c	YPR020w				YGL013c	YGR192c	0.539313
YBR066c	YPR101w				YGL013c	YGR197c	0.629501
YBR066c	YPR149w				YGL013c	YGR213c	0.439975
YBR066c	YPR151c				YGL013c	YGR224w	0.0075069
YBR066c	YPR191w				YGL013c	YGR243w	0.166024
YBR083w	YAL028w				YGL013c	YGR245c	0.00607605
YBR083w	YAL029c				YGL013c	YGR248w	0.213977
YBR083w	YAL038w				YGL013c	YGR249w	0.193614
YBR083w	YAL039c				YGL013c	YGR254w	0.938505
YBR083w	YAL040c				YGL013c	YGR256w	0.40354
YBR083w	YAL041w				YGL013c	YGR279c	0.745816
YBR083w	YAR010c				YGL013c	YGR280c	0.355233
YBR083w	YAR014c				YGL013c	YGR281w	0.851805
YBR083w	YAR015w				YGL013c	YGR295c	0.00187993
YBR083w	YAR071w				YGL013c	YHL011c	0.418602
YBR083w	YBL002w				YGL013c	YHL012w	0.33695
YBR083w	YBL004w				YGL013c	YHL013c	0.775551
YBR083w	YBL011w				YGL013c	YHL015w	0.793548
YBR083w	YBL014c				YGL013c	YHL016c	0.412955
YBR083w	YBL016w				YGL013c	YHL021c	0.917794
YBR083w	YBL017c				YGL013c	YHL028w	0.355835
YBR083w	YBL027w				YGL013c	YHL029c	0.372079
YBR083w	YBL028c				YGL013c	YHL030w	0.404638
YBR083w	YBL029c-a				YGL013c	YHL036w	0.35545
YBR083w	YBL029w				YGL013c	YHL048w	0.465013
YBR083w	YBL030c				YGL013c	YHR018c	0.467323
YBR083w	YBL037w				YGL013c	YHR029c	0.393887
YBR083w	YBL041w				YGL013c	YHR030c	0.0253047
YBR083w	YBL042c				YGL013c	YHR071w	0.0193103
YBR083w	YBL043w				YGL013c	YHR086w	0.023685
YBR083w	YBL044w				YGL013c	YHR087w	0.260905
YBR083w	YBL045c				YGL013c	YHR091c	0.31437
YBR083w	YBL099w				YGL013c	YHR092c	0.241557
YBR083w	YBR007c				YGL013c	YHR094c	0.272658
YBR083w	YBR011c				YGL013c	YHR104w	0.254681
YBR083w	YBR021w				YGL013c	YHR136c	0.290604
YBR083w	YBR040w				YGL013c	YHR139c	0.390338
YBR083w	YBR048w				YGL013c	YHR140w	0.574561
YBR083w	YBR066c				YGL013c	YHR141c	0.91824
YBR083w	YBR067c				YGL013c	YHR142w	0.238932
YBR083w	YBR077c				YGL013c	YHR162w	0.0080569
YBR083w	YBR078w				YGL013c	YHR170w	0.152804
YBR083w	YBR082c				YGL013c	YHR179w	0.522495
YBR083w	YBR083w				YGL013c	YHR193c	0.170545
YBR083w	YBR093c				YGL013c	YHR194w	0.702294
YBR083w	YBR094w				YGL013c	YHR196w	0.363437
YBR083w	YBR117c				YGL013c	YHR197w	0.555171
YBR083w	YBR118w				YGL013c	YHR202w	0.422142
YBR083w	YBR133c				YGL013c	YIL003w	0.856284
YBR083w	YBR135w				YGL013c	YIL013c	0.668156
YBR083w	YBR150c				YGL013c	YIL018w	0.00792061
YBR083w	YBR151w				YGL013c	YIL019w	0.0588801
YBR083w	YBR162c				YGL013c	YIL056w	0.537832
YBR083w	YBR162w-a				YGL013c	YIL087c	0.246241
YBR083w	YBR200w				YGL013c	YIL099w	0.932304
YBR083w	YBR202w				YGL013c	YIL103w	0.393789
YBR083w	YBR208c				YGL013c	YIL104c	0.401689
YBR083w	YBR210w				YGL013c	YIL113w	0.0747085
YBR083w	YBR301w				YGL013c	YIL116w	0.700762
YBR083w	YCL021w-a				YGL013c	YIL117c	0.442882
YBR083w	YCL027w				YGL013c	YIL118w	0.852132
YBR083w	YCR005c				YGL013c	YIL119c	0.157876
YBR083w	YCR017c				YGL013c	YIL128w	0.889999
YBR083w	YCR018c				YGL013c	YIL129c	0.999614
YBR083w	YCR023c				YGL013c	YIL133c	0.49766
YBR083w	YCR027c				YGL013c	YIL136w	0.702314
YBR083w	YCR061w				YGL013c	YIL172c	0.700043
YBR083w	YCR089w				YGL013c	YIR017c	0.123083
YBR083w	YCR107w				YGL013c	YIR018w	0.859695
YBR083w	YDL047w				YGL013c	YIR038c	0.158089
YBR083w	YDL048c				YGL013c	YIR039c	0.372121
YBR083w	YDL049c				YGL013c	YJL001w	0.0342152
YBR083w	YDL055c				YGL013c	YJL008c	0.396188
YBR083w	YDL126c				YGL013c	YJL016w	0.080506
YBR083w	YDL127w				YGL013c	YJL042w	0.305042
YBR083w	YDL128w				YGL013c	YJL043w	0.157425
YBR083w	YDL160c				YGL013c	YJL052w	0.82399
YBR083w	YDL161w				YGL013c	YJL082w	0.400082
YBR083w	YDL182w				YGL013c	YJL083w	0.0842534
YBR083w	YDL183c				YGL013c	YJL090c	0.994495
YBR083w	YDL214c				YGL013c	YJL161w	0.127064
YBR083w	YDL222c				YGL013c	YJL163c	0.517638
YBR083w	YDR011w				YGL013c	YJL185c	0.797706
YBR083w	YDR034c				YGL013c	YJL189w	0.903256
YBR083w	YDR041w				YGL013c	YJL192c	0.441707
YBR083w	YDR043c				YGL013c	YJL201w	0.535957
YBR083w	YDR044w				YGL013c	YJL216c	0.300003
YBR083w	YDR055w				YGL013c	YJL219w	0.814985
YBR083w	YDR077w				YGL013c	YJR044c	0.256555
YBR083w	YDR098c				YGL013c	YJR096w	0.489181
YBR083w	YDR099w				YGL013c	YJR123w	0.992162
YBR083w	YDR132c				YGL013c	YJR144w	0.871984
YBR083w	YDR169c				YGL013c	YJR148w	0.913097
YBR083w	YDR169c-a				YGL013c	YJR154w	0.543181
YBR083w	YDR170c				YGL013c	YKL007w	0.13754
YBR083w	YDR171w				YGL013c	YKL008c	0.216328
YBR083w	YDR180w				YGL013c	YKL029c	0.172093
YBR083w	YDR186c				YGL013c	YKL035w	0.443457
YBR083w	YDR188w				YGL013c	YKL062w	0.611151
YBR083w	YDR210w				YGL013c	YKL067w	0.268139
YBR083w	YDR211w				YGL013c	YKL071w	0.575227
YBR083w	YDR226w				YGL013c	YKL086w	0.397142
YBR083w	YDR249c				YGL013c	YKL091c	0.189386
YBR083w	YDR251w				YGL013c	YKL096w	0.681665
YBR083w	YDR259c				YGL013c	YKL096w-a	0.561562
YBR083w	YDR261c				YGL013c	YKL109w	0.273519
YBR083w	YDR262w				YGL013c	YKL110c	0.189731
YBR083w	YDR275w				YGL013c	YKL129c	0.61825
YBR083w	YDR309c				YGL013c	YKL132c	0.169922
YBR083w	YDR316w-b				YGL013c	YKL139w	0.911897
YBR083w	YDR317w				YGL013c	YKL150w	0.122825
YBR083w	YDR342c				YGL013c	YKL151c	0.487065
YBR083w	YDR345c				YGL013c	YKL182w	0.636433
YBR083w	YDR365c				YGL013c	YKL187c	0.805301
YBR083w	YDR378c				YGL013c	YKL201c	0.773946
YBR083w	YDR379w				YGL013c	YKL209c	0.298217
YBR083w	YDR384c				YGL013c	YKL216w	0.00491704
YBR083w	YDR385w				YGL013c	YKR042w	0.638367
YBR083w	YDR441c				YGL013c	YLL001w	0.28331
YBR083w	YDR446w				YGL013c	YLL024c	0.903562
YBR083w	YDR447c				YGL013c	YLL026w	0.373589
YBR083w	YDR448w				YGL013c	YLL027w	0.404342
YBR083w	YDR451c				YGL013c	YLL028w	0.776874
YBR083w	YDR452w				YGL013c	YLL050c	0.0704267
YBR083w	YDR461w				YGL013c	YLL056c	0.863648
YBR083w	YDR463w				YGL013c	YLR014c	0.414662
YBR083w	YDR508c				YGL013c	YLR042c	0.712733
YBR083w	YDR510w				YGL013c	YLR044c	0.792871
YBR083w	YDR522c				YGL013c	YLR060w	0.228225
YBR083w	YDR524c-b				YGL013c	YLR099c	0.699995
YBR083w	YDR525w-a				YGL013c	YLR099w-a	0.377733
YBR083w	YDR528w				YGL013c	YLR100w	0.71547
YBR083w	YEL001c				YGL013c	YLR108c	0.196655
YBR083w	YEL007w				YGL013c	YLR109w	0.301457
YBR083w	YEL009c				YGL013c	YLR113w	0.0110474
YBR083w	YEL011w				YGL013c	YLR121c	0.234672
YBR083w	YEL021w				YGL013c	YLR136c	0.760841
YBR083w	YEL040w				YGL013c	YLR149c	0.277184
YBR083w	YEL062w				YGL013c	YLR162w	0.723435
YBR083w	YEL063c				YGL013c	YLR178c	0.138868
YBR083w	YER001w				YGL013c	YLR180w	0.905362
YBR083w	YER053c-a				YGL013c	YLR194c	0.360603
YBR083w	YER056c				YGL013c	YLR206w	0.557175
YBR083w	YER064c				YGL013c	YLR207w	0.812515
YBR083w	YER070w				YGL013c	YLR251w	0.235295
YBR083w	YER073w				YGL013c	YLR258w	0.214214
YBR083w	YER075c				YGL013c	YLR297w	0.668538
YBR083w	YER103w				YGL013c	YLR303w	0.0700601
YBR083w	YER109c				YGL013c	YLR304c	0.300239
YBR083w	YER118c				YGL013c	YLR312c	0.681259
YBR083w	YER120w				YGL013c	YLR323c	0.72341
YBR083w	YER137c				YGL013c	YLR327c	0.706912
YBR083w	YER138w-a				YGL013c	YLR342w	0.814479
YBR083w	YER145c				YGL013c	YLR346c	0.325832
YBR083w	YER146w				YGL013c	YLR348c	0.453956
YBR083w	YER149c				YGL013c	YLR355c	0.494266
YBR083w	YER150w				YGL013c	YLR360w	0.364004
YBR083w	YER158c				YGL013c	YLR413w	0.804883
YBR083w	YER159c				YGL013c	YLR461w	0.600727
YBR083w	YER177w				YGL013c	YLR462w	0.281538
YBR083w	YER184c				YGL013c	YML018c	0.255722
YBR083w	YER185w				YGL013c	YML098w	0.687509
YBR083w	YFL014w				YGL013c	YML100w	0.14983
YBR083w	YFL016c				YGL013c	YML111w	0.394502
YBR083w	YFL039c				YGL013c	YML112w	0.287338
YBR083w	YFL047w				YGL013c	YML116w	0.994079
YBR083w	YFL048c				YGL013c	YML123c	0.658575
YBR083w	YFR053c				YGL013c	YML125c	0.734231
YBR083w	YFR055w				YGL013c	YML128c	0.0779183
YBR083w	YGL006w-a				YGL013c	YML130c	0.355095
YBR083w	YGL007c-a				YGL013c	YML131w	0.761794
YBR083w	YGL032c				YGL013c	YMR006c	0.605972
YBR083w	YGL036w				YGL013c	YMR011w	0.667956
YBR083w	YGL037c				YGL013c	YMR015c	0.853985
YBR083w	YGL062w				YGL013c	YMR016c	0.826151
YBR083w	YGL076c				YGL013c	YMR056c	0.769723
YBR083w	YGL096w				YGL013c	YMR058w	0.844553
YBR083w	YGL145w				YGL013c	YMR062c	0.820813
YBR083w	YGL146c				YGL013c	YMR070w	0.549055
YBR083w	YGL147c				YGL013c	YMR096w	0.23019
YBR083w	YGL158w				YGL013c	YMR102c	0.205961
YBR083w	YGL162w				YGL013c	YMR104c	0.753891
YBR083w	YGL163c				YGL013c	YMR105c	0.222365
YBR083w	YGL178w				YGL013c	YMR107w	0.865096
YBR083w	YGL179c				YGL013c	YMR134w	0.534978
YBR083w	YGL192w				YGL013c	YMR136w	0.637299
YBR083w	YGL194c				YGL013c	YMR145c	0.937367
YBR083w	YGR014w				YGL013c	YMR165c	0.0984419
YBR083w	YGR027c				YGL013c	YMR169c	0.0999069
YBR083w	YGR028w				YGL013c	YMR195w	0.133881
YBR083w	YGR032w				YGL013c	YMR196w	0.33159
YBR083w	YGR040w				YGL013c	YMR199w	0.749201
YBR083w	YGR052w				YGL013c	YMR220w	0.824862
YBR083w	YGR060w				YGL013c	YMR240c	0.488823
YBR083w	YGR086c				YGL013c	YMR241w	0.0445882
YBR083w	YGR101w				YGL013c	YMR251w-a	0.223289
YBR083w	YGR121c				YGL013c	YMR291w	0.128858
YBR083w	YGR121w-a				YGL013c	YMR307w	0.445342
YBR083w	YGR122w				YGL013c	YMR316w	0.924127
YBR083w	YGR125w				YGL013c	YMR318c	0.414342
YBR083w	YGR143w				YGL013c	YNL010w	0.779567
YBR083w	YGR149w				YGL013c	YNL035c	0.79663
YBR083w	YGR152c				YGL013c	YNL036w	0.468009
YBR083w	YGR153w				YGL013c	YNL038w	0.600157
YBR083w	YGR161c				YGL013c	YNL069c	0.895911
YBR083w	YGR162w				YGL013c	YNL077w	0.0958306
YBR083w	YGR183c				YGL013c	YNL111c	0.641262
YBR083w	YGR189c				YGL013c	YNL123w	0.543115
YBR083w	YGR191w				YGL013c	YNL134c	0.417637
YBR083w	YGR213c				YGL013c	YNL144c	0.682063
YBR083w	YGR218w				YGL013c	YNL160w	0.516903
YBR083w	YGR221c				YGL013c	YNL192w	0.776265
YBR083w	YGR222w				YGL013c	YNL194c	0.475548
YBR083w	YGR229c				YGL013c	YNL195c	0.755601
YBR083w	YGR230w				YGL013c	YNL200c	0.215935
YBR083w	YGR233c				YGL013c	YNL202w	0.347648
YBR083w	YGR234w				YGL013c	YNL230c	0.0994986
YBR083w	YGR249w				YGL013c	YNL231c	0.268343
YBR083w	YGR250c				YGL013c	YNL236w	0.771112
YBR083w	YGR251w				YGL013c	YNL237w	0.607696
YBR083w	YHL015w				YGL013c	YNL241c	0.694054
YBR083w	YHL015w-a				YGL013c	YNL259c	0.802331
YBR083w	YHL016c				YGL013c	YNL265c	0.98342
YBR083w	YHL021c				YGL013c	YNL274c	0.46863
YBR083w	YHL024w				YGL013c	YNL289w	0.49526
YBR083w	YHL044w				YGL013c	YNR014w	0.423179
YBR083w	YHR005c				YGL013c	YNR044w	0.296816
YBR083w	YHR007c				YGL013c	YNR050c	0.0663061
YBR083w	YHR033w				YGL013c	YNR060w	0.388536
YBR083w	YHR084w				YGL013c	YNR067c	0.920431
YBR083w	YHR092c				YGL013c	YNR075w	0.102447
YBR083w	YHR094c				YGL013c	YOL010w	0.414439
YBR083w	YHR096c				YGL013c	YOL016c	0.695282
YBR083w	YHR141c				YGL013c	YOL029c	0.513237
YBR083w	YHR142w				YGL013c	YOL052c-a	0.483873
YBR083w	YHR152w				YGL013c	YOL058w	0.367459
YBR083w	YHR156c				YGL013c	YOL077c	0.55497
YBR083w	YIL095w				YGL013c	YOL077w-a	0.573836
YBR083w	YIL096c				YGL013c	YOL078w	0.213097
YBR083w	YIL116w				YGL013c	YOL080c	0.656071
YBR083w	YIL117c				YGL013c	YOL084w	0.838654
YBR083w	YIL118w				YGL013c	YOL086c	0.922033
YBR083w	YIL119c				YGL013c	YOL101c	0.0737128
YBR083w	YIL123w				YGL013c	YOL109w	0.893802
YBR083w	YIL140w				YGL013c	YOL121c	0.807329
YBR083w	YIL172c				YGL013c	YOL125w	0.0275718
YBR083w	YIR013c				YGL013c	YOL126c	0.395232
YBR083w	YIR017c				YGL013c	YOL149w	0.158786
YBR083w	YIR018c-a				YGL013c	YOL151w	0.144136
YBR083w	YIR018w				YGL013c	YOL156w	0.987733
YBR083w	YIR019c				YGL013c	YOL158c	0.545558
YBR083w	YIR021w				YGL013c	YOR009w	0.0776662
YBR083w	YIR027c				YGL013c	YOR020c	0.523151
YBR083w	YIR028w				YGL013c	YOR049c	0.461166
YBR083w	YIR029w				YGL013c	YOR052c	0.401819
YBR083w	YIR031c				YGL013c	YOR065w	0.0422805
YBR083w	YJL045w				YGL013c	YOR095c	0.422289
YBR083w	YJL047c-a				YGL013c	YOR120w	0.0951982
YBR083w	YJL048c				YGL013c	YOR136w	0.313579
YBR083w	YJL083w				YGL013c	YOR138c	0.160156
YBR083w	YJL084c				YGL013c	YOR140w	0.179328
YBR083w	YJL105w				YGL013c	YOR152c	0.59835
YBR083w	YJL112w				YGL013c	YOR153w	0.242981
YBR083w	YJL130c				YGL013c	YOR161c	0.132393
YBR083w	YJL145w				YGL013c	YOR162c	0.173366
YBR083w	YJL158c				YGL013c	YOR173w	0.242183
YBR083w	YJL186w				YGL013c	YOR176w	0.374298
YBR083w	YJL187c				YGL013c	YOR178c	0.164851
YBR083w	YJL194w				YGL013c	YOR192c	0.656845
YBR083w	YJL196c				YGL013c	YOR202w	0.296781
YBR083w	YJL214w				YGL013c	YOR246c	0.101406
YBR083w	YJL216c				YGL013c	YOR247w	0.302834
YBR083w	YJR025c				YGL013c	YOR268c	0.692073
YBR083w	YJR094c				YGL013c	YOR269w	0.388196
YBR083w	YJR094w-a				YGL013c	YOR273c	0.462407
YBR083w	YJR109c				YGL013c	YOR274w	0.952737
YBR083w	YJR110w				YGL013c	YOR303w	0.809636
YBR083w	YJR113c				YGL013c	YOR307c	0.497491
YBR083w	YJR115w				YGL013c	YOR315w	0.793524
YBR083w	YJR123w				YGL013c	YOR319w	0.962764
YBR083w	YJR127c				YGL013c	YOR327c	0.678205
YBR083w	YJR148w				YGL013c	YOR328w	0.705301
YBR083w	YJR152w				YGL013c	YOR341w	0.0841251
YBR083w	YJR153w				YGL013c	YOR342c	0.0935615
YBR083w	YKL006c-a				YGL013c	YOR344c	0.216094
YBR083w	YKL006w				YGL013c	YOR346w	0.441687
YBR083w	YKL028w				YGL013c	YOR348c	0.419037
YBR083w	YKL029c				YGL013c	YOR349w	0.327028
YBR083w	YKL032c				YGL013c	YOR374w	0.383746
YBR083w	YKL043w				YGL013c	YOR380w	0.360104
YBR083w	YKL095w				YGL013c	YOR381w	0.5138
YBR083w	YKL096c-b				YGL013c	YOR382w	0.797642
YBR083w	YKL096w				YGL013c	YOR385w	0.902373
YBR083w	YKL096w-a				YGL013c	YPL004c	0.379163
YBR083w	YKL101w				YGL013c	YPL012w	0.161719
YBR083w	YKL103c				YGL013c	YPL014w	0.774272
YBR083w	YKL104c				YGL013c	YPL017c	0.496729
YBR083w	YKL109w				YGL013c	YPL018w	0.632901
YBR083w	YKL110c				YGL013c	YPL019c	0.673703
YBR083w	YKL156w				YGL013c	YPL058c	0.604663
YBR083w	YKL157w				YGL013c	YPL061w	0.873704
YBR083w	YKL163w				YGL013c	YPL068c	0.65533
YBR083w	YKL164c				YGL013c	YPL088w	0.747934
YBR083w	YKL179c				YGL013c	YPL135w	0.0600118
YBR083w	YKL201c				YGL013c	YPL143w	0.882771
YBR083w	YKR011c				YGL013c	YPL144w	0.81491
YBR083w	YKR013w				YGL013c	YPL154c	0.553239
YBR083w	YKR031c				YGL013c	YPL186c	0.137819
YBR083w	YKR034w				YGL013c	YPL211w	0.463436
YBR083w	YKR038c				YGL013c	YPL230w	0.531266
YBR083w	YKR039w				YGL013c	YPL247c	0.911172
YBR083w	YKR041w				YGL013c	YPL249c-a	0.891482
YBR083w	YKR042w				YGL013c	YPL250c	0.0568172
YBR083w	YKR061w				YGL013c	YPL253c	0.841136
YBR083w	YKR091w				YGL013c	YPL265w	0.404678
YBR083w	YKR100c				YGL013c	YPL274w	0.98247
YBR083w	YKR101w				YGL013c	YPL278c	0.974419
YBR083w	YLL015w				YGL013c	YPR010c	0.129084
YBR083w	YLL052c				YGL013c	YPR016c	0.998762
YBR083w	YLL054c				YGL013c	YPR027c	0.60094
YBR083w	YLR023c				YGL013c	YPR035w	0.483332
YBR083w	YLR035c				YGL013c	YPR036w-a	0.281932
YBR083w	YLR042c				YGL013c	YPR065w	0.206862
YBR083w	YLR053c				YGL013c	YPR127w	0.528145
YBR083w	YLR084c				YGL013c	YPR145w	0.536163
YBR083w	YLR110c				YGL013c	YPR149w	0.889188
YBR083w	YLR113w				YGL013c	YPR160w	0.28516
YBR083w	YLR120c				YGL013c	YPR167c	0.731686
YBR083w	YLR157w-c				YGL013c	YPR169w	0.182585
YBR083w	YLR220w				YGL013c	YPR171w	0.577408
YBR083w	YLR227c				YGL013c	YPR184w	0.222752
YBR083w	YLR250w				YGL013c	YPR192w	0.364979
YBR083w	YLR257w				YGL013c	YPR201w	0.468263
YBR083w	YLR303w				YGL071w	YAL005c	0.844646
YBR083w	YLR332w				YGL071w	YAL017w	0.516506
YBR083w	YLR342w				YGL071w	YAL018c	0.869149
YBR083w	YLR347c				YGL071w	YAL030w	0.494521
YBR083w	YLR353w				YGL071w	YAL031c	0.704604
YBR083w	YLR360w				YGL071w	YAL060w	0.322463
YBR083w	YLR401c				YGL071w	YAL061w	0.30746
YBR083w	YLR403w				YGL071w	YAL063c	0.174599
YBR083w	YLR412c-a				YGL071w	YAR028w	0.572814
YBR083w	YLR413w				YGL071w	YAR050w	0.368965
YBR083w	YLR414c				YGL071w	YBL013w	0.788071
YBR083w	YLR417w				YGL071w	YBL014c	0.0138737
YBR083w	YLR438w				YGL071w	YBL029c-a	0.208274
YBR083w	YLR446w				YGL071w	YBL036c	0.155637
YBR083w	YLR449w				YGL071w	YBL042c	0.141821
[truncated: 37,595 more rows]

## Sheet: PRSqGO
SIGNIFICANT TARGETS
[truncated: 196 more rows]

[truncated: 1 more sheets: PRSpGO]
