# Supplementary material for: Yeast cells with impaired drug resistance accumulate glycerol and glucose
Source: Royal Society of Chemistry journal article supplement (doi:10.1039/c2mb25512j), 2013-10-22
Supplement: c2mb25512j_3.xlsx [file c2mb25512j_3.xlsx]

## Sheet: Metabolome data
Metabolome data
	EXOMETABOLOME						ENDOMETABOLOME
Metabolite	C-lim-Δqdr3/Δqdr3	C-lim-Δpdr3/Δpdr3	C-lim-Δho/Δho	N-lim-Δqdr3/Δqdr3	N-lim-Δpdr3/Δpdr3	N-lim -Δho/Δho	C-lim-Δqdr3/Δqdr3	C-lim-Δpdr3/Δpdr3	C-lim-Δho/Δho	N-lim-Δqdr3/Δqdr3	N-lim-Δpdr3/Δpdr3	N-lim -Δho/Δho
1,6-anhydroglucose	0	0	0	0.0138706	0.0251319	0.00768172	1.064	0.686229	1.14627	0.878362	2.11183	0.12643
2-desoxy-pentos-3-ulose	0.0113239	0.00920673	0	3.03968	0.0534205	0.00992732	0.0647782	0.0091206	0.00526399	0.0208829	0.0200749	1.48387
2-hydroxyglutarate	0	0	0	0	0	0	0.00410262	0.018238	0.0120554	0.00534319	0.0874725	0.0032819
2-ketoglutarate	0	0	0	0	0	0	0.0125884	0.0134215	0.0177769	0.0404853	0.00733901	0
MG(16:0)	0	0	0	0	0	0	0.0020325	0.00233871	0	0.0141648	0.0856395	0.0368583
3-hydroxy-3-methylglutarate	0	0	0.0355371	0	0.0336813	0	0.0143917	0.0159874	0.0133358	0.0381299	0.0299822	0
3-methyl-2-hydroxybutanoate	0	0	0	0	0	0	0.135135	0.544514	0.237821	0.0353068	0	0.428127
4-deoxypyridoxine	0	0	0	0	0.0169614	0.413567	0	0	0	0.0268913	0.0174085	0.0108167
4-methyl-2-hydroxypentanoate	0.826625	0.748056	1.15174	0.516997	0.368913	0.494018	0.0221216	0.0696742	0.0363797	0.0250449	0.0149445	0.0285213
alanine	0	0	0	0	0	0	0.0772135	0.0748864	0.0287417	0	0	0.024556
alpha ketoglutarate	0.0992325	0.103064	0.118408	0	0.129249	0.136766	0.00805332	0.0237555	0.00929026	0.00897715	0	0
ammonium	0.0272169	0.0326104	0	0	0	0	0	0	0	0	0	0
benzoate	0	0	0	0.0755119	0	0.163247	0	0	0.00206118	0.0078327	0	0.00280482
erythronate	0	0.0218432	0	0	0	0	0.0125707	0.0307542	0.0146794	0	0	0
glucose	0.0323384	0.0306867	0	0.193094	0.00355871	0	0.35135	0.287071	0	2.16553	2.27727	0
glucuronolactone	0	0	0	0	0	0	0	0	0	0.00243029	0	0.00267233
glutamate	0	0	0	0	0	0	0	0	0	0	0	0.298294
glycerate	0	0	0	0	0	0	0.0179709	0.00972985	0.022004	0.0111178	0	0
glycerol	0.0113239	0.00920673	0	3.03968	0.0534205	1.23709	1.57549	0.305599	0	0	2.18947	1.48387
glycine	0	0	0	0	0	0.0106564	0	0	0	0.00247805	0.0129111	0.00833724
heptadecanoate	0	0.00774704	0.00707251	0	0	0	0	0	0	0	0	0
hexadecanoate	0.035092	0.0339598	0.0256013	0	0.00416232	0.0211981	0.0331832	0.0329401	0.0318357	0.0833324	0.0714892	0.0731821
homoserine	0	0	0	0	0	0	0.0124727	0.0164677	0.0247691	0.0271317	0.00689582	0.0250162
isoaleprolate	0	0	0	0.049357	0.0433018	0.0536107	0.00718197	0.00506447	0.00756298	0.000534968	0.0240868	0.000336181
isoleucine	0	0	0	0	0	0	0.00275726	0	0.00322594	0	0.0228942	0.0135806
lactate	0	0	0	0.0869935	0.0531213	0.16648	0.00330035	0.00981543	0.0203653	0.00722628	0.00572306	0.00582113
leucine	0.0342858	0.0134659	0	0	0	0	0.990397	1.66784	1.4111	0.00829889	0	0.00484383
lysine	0	0	0	0	0	0	0	0.0205057	0.0119353	0.024291	0.149582	0.592881
malonate	0.256076	0.241005	0.217032	0.176529	0.222565	0.185431	0.671904	0.690536	0.705035	0.376408	0.420268	0.539941
maltose	0	0	0	0	0	0	0.0303979	0.0337018	0.00954172	0.0569608	0.136976	0.153635
MG(16:1)	0	0	0	0.0210806	0.0356526	0.0319965	1.59688	0.590434	1.59314	0.0569608	3.03701	0.218195
MG(18:1)	0	0	0	0	0	0	0.00707302	0.0116692	0.0087402	0.0250354	0.0168915	0.0141875
MG(18:0)	0	0	0	0.0493164	0.0202928	0.0141813	0	0	0	0	0	0
myo-inositol	0	0	0	0	0.0108521	0.0226271	0.00872193	0.0113661	0.0135443	0.0495056	0.0130412	0.0304864
myo-inositol-1-phosphate	0.00347254	0	0.00618902	0	0	0	0.00566476	0.00337525	0.00587276	0.00989768	0.00873992	0.0143972
N-acetylalanine	0	0	0	0	0	0	0.029996	0.0273047	0.0270942	0.0350416	0.0727649	0.054392
octadecanoate	0	0	0	0	0	0	0.0612492	0.0778093	0.0811785	0.269876	0.163987	0.330193
pantothenate	0	0	0	0.00655067	0.129407	0.0400398	0	0	0	0	0	0
pentadecanoate	0	0	0	0	0	0.217515	0	0	0	0	0	0
phenolate	0	0	0	0	0	0.0483845	0.00763436	0.00582523	0.00779605	0.0129569	0	0.012905
erythronate	18.4131	14.2606	17.8746	0	14.518	14.0252	0.0333587	0.0224739	0.0240539	0.0329059	1.45865	0.685271
phosphocreatinine	0	0	0	0.278024	0.164379	0.175287	0.0245166	0.0403233	0.05935	0	0.0740148	0.1993
phosphorate	0.175693	0.0775132	0.015419	0	2.29633	2.55747	0.0222654	0.0168094	0.02043	2.82217	2.35637	1.48715
pyroglutamate	0.195561	0.289397	0.0147345	0.818727	0	3.36285	0.208513	0.193774	0.0459775	0.24617	0.141956	0.469036
pyruvate	0	0	0	0.069709	0.0562613	0.045472	0	0.00646332	0	0.00923929	0.0213607	0.00641659
serine	0.0106938	0.016504	0.0195945	0.00474219	0.0245925	0.961002	0.00901622	0.00914818	0.00266669	1.04269	0.0329952	0.0497209
succinate	0.0223081	0.0411657	0	0.23881	0.308518	0.385875	0	0	0	0	0.0129397	0.078606
sucrose	0	0	0	0	0	0	0	0.00201317	0.0026148	0.01008	0	0
sulphate	0	0	0	0	0	0.0146168	0	0	0	0	0	0
threonine	0.0373981	0.114988	0.121046	115.534	4.88761	93.9707	0.0544539	0.0338914	0.279081	0.293282	0.0522691	0.0508932
trihydroxybenzene	0	0	0	0	0	0	0	0	0	0.00405544	0	0.00210241
trihyrdoxylamine	0	0	0	0.0323042	0	0	0	0.00259769	0	0	0	0
uracil	0.0894148	0.0901092	0.0583731	0.131362	0.12731	0.20831	0	0.0127158	0.00767359	0.00922553	0.00941853	0.0108708
valine	0	0	0	0	0	0	0.101275	0.151529	0.114043	0.0616505	0.00354839	0.0974015
