# Supplementary material for: Yeast cells with impaired drug resistance accumulate glycerol and glucose
Source: Royal Society of Chemistry journal article supplement (doi:10.1039/c2mb25512j), 2013-10-22
Supplement: c2mb25512j_4.xlsx [file c2mb25512j_4.xlsx]

## Sheet: in silico flux distributions
FBA data
Flux	C-lim-Δqdr3/Δqdr3	C-lim-Δpdr3/Δpdr3	C-lim-Δho/Δho	N-lim-Δqdr3/Δqdr3	N-lim-Δpdr3/Δpdr3	N-lim -Δho/Δho
GLK1	0	0	0	0	0	0
GLK1	0	0	0	0	0	0
GLK1	0	0	0	0	0	0
HXK1	0	0	0	0	0	0
HXK1	0	0	0	0	0	0
HXK1	0	0	0	0	0	0
HXK1	0	0	0	0	0	0
HXK2	0	0	0	0	0	0
HXK2	1.2073	1.9623	1.8034	5.8886	6.6569	3.7855
HXK2	0	0	0	0	0	0
HXK2	0	0	0	0	0	0
PGI1	-998.963	-1000	-1000	-994.538	-993.836	-996.638
PGI1	1000	996.803	997.108	1000	1000	1000
PGI1	1000	996.803	997.108	1000	1000	1000
PFK2	0	0	0	0	0	0
PFK1	0.8891	0	0	5.513	6.2237	3.4152
PFK1	0	0	0	0	0	0
PFK1	0	0	0	0	0	0
FBA1	0.8891	0	0	5.513	6.2237	3.4152
TPI1	0.6645	-0.0525	-0.0861	4.9211	6.0529	3.4008
TDH1	1000	1000	1000	1000	1000	1000
TDH2	-1000	-1000	-1000	-1000	-1000	-1000
TDH3	1.5098	1.5758	1.3898	10.4896	12.3365	6.8724
PGK1	1.5098	1.5758	1.3898	10.4896	12.3365	6.8724
GPM1	0	0	0	0	0	0
GPM1	1.478	1.4902	1.3107	10.4868	12.3365	6.807
GPM2	-1000	-1000	-1000	-1000	-1000	-1000
GPM3	1000	1000	1000	1000	1000	1000
ENO1	1.478	1.4902	1.3107	1000	1000	1000
ENO2	-1000	-1000	-1000	-1000	-1000	-1000
ERR1	1000	1000	1000	10.4868	12.3365	6.807
ERR2	1000	1000	1000	-1000	-1000	-1000
ERR1	-1000	-1000	-1000	1000	1000	1000
CDC19	0	0	0	0	0	0
PYK2	1.4252	1.4374	1.2579	10.4339	12.2836	6.7541
PDA1	0.8616	0.8768	0.7152	0.1235	0	0.2546
CIT1	0	0	0	0	0	0
CIT2	0	0	0	0	0	0
CIT3	0.8033	0.8185	0.6569	0.1019	0.1019	0.1963
ACO1	-999.197	-999.182	-999.343	-999.898	-999.898	-999.804
YJL200C	1000	1000	1000	1000	1000	1000
IDH1	1.8713	0.6378	0.4762	0.0126	0.0126	0
IDP1	-1.2162	0.0914	0.0914	0	0	0.0719
IDP2	0.0893	0.0893	0.0893	0.0893	0.0893	0.0893
IDP3	0	0	0	0	0	0
IDP1	-1.2162	0.0914	0.0914	0	0	0.0719
IDP2	0.0893	0.0893	0.0893	0.0893	0.0893	0.0893
IDP3	0	0	0	0	0	0
KGD1	0.6425	0.7167	0.5551	0	0	0.0594
LSC2	-0.6425	-0.7167	-0.5551	0	0	-0.0594
LSC1	0	0	0	0	0	0
SDH3	1000	1000	1000	999.989	999.84	1000
YEL047C	999.315	999.335	999.485	1000	1000	999.921
OSM1	0	0	0	0	0	0
FUM1	1000	1000	1000	999.989	999.84	1000
FUM1	-999.292	-999.298	-999.448	-999.962	-999.962	-999.883
MDH1	-4.7116	-21.1377	-18.8087	-0.6683	-0.6414	-0.3711
MDH3	1000	1000	1000	1000	1000	1000
MDH2	-994.58	-978.16	-980.639	-999.305	-999.641	-999.512
ICL1	0.059	0	0	0	0	0.0351
ICL2	0	0	0	0	0	0
DAL7	0	0	0	0	0	0
MLS1	0	0	0	0	0	0
PCK1	0	0	0	0	0	0
FBP1	0	0	0	0	0	0
PYC1	0.1737	0.2536	0.2418	0.3501	0.8584	0.1817
PYC2	0	0	0	0	0	0
MAE1	0	0	0	0	0.1598	0
ZWF1	0	4.9883	4.5246	0.256	0.3224	0.2526
SOL1	0	0	0	0	0	0
SOL2	0	0	0	0	0	0
SOL3	0	4.9883	4.5246	0.256	0.3224	0.2526
SOL4	0	0	0	0	0	0
GND2	0	4.9883	4.5246	0.256	0.3224	0.2526
GND1	0	0	0	0	0	0
RPE1	-0.0668	3.2773	2.9725	0.1317	0.1406	0.1336
RKI1	0.0668	1.711	1.5521	0.1243	0.1818	0.119
TKL2	999.98	1000	1000	1000	1000	1000
TKL2	-1000	-998.375	-998.527	-999.947	-999.943	-999.946
TKL1	-1000	-998.348	-998.5	-999.921	-999.917	-999.92
TKL1	999.953	1000	1000	1000	1000	1000
TAL1	-1000	-998.348	-998.5	-999.921	-999.917	-999.92
YGR043C	999.98	1000	1000	1000	1000	1000
RBK1	0	0	0	0	0	0
RBK1	0	0	0	0	0	0
PGM1	999.933	1000	1000	-1000	-1000	-1000
PGM1	999.832	999.832	999.832	-1000	-1000	-1000
PGM2	-1000	-1000	-1000	1000	1000	1000
PGM2	-1000	-1000	-1000	999.832	999.832	999.832
PMI40	-0.0808	-0.0808	-0.0808	-0.0808	-0.0808	-0.0808
SEC53	0.0808	0.0808	0.0808	0.0808	0.0808	0.0808
PSA1	0.0808	0.0808	0.0808	0.0808	0.0808	0.0808
PFK26	0	0	0	0	0	0
PFK27	0	0	0	0	0	0
FBP26	0	0	0	0	0	0
U1_	0	0	0	0	0	0
SOR1	0	0	0	0	0	0
GAL1	0	0	0	0	0	0
GAL7	-1000	-1000	-1000	-1000	-1000	-1000
GAL10	0	0	0	0	0	0
YHL012W	1000	1000	1000	1000	1000	1000
UGP1	0.1677	0.1677	0.1677	0.1677	0.1677	0.1677
YBR184W	0	0	0	0	0	0
YBR184W	0	0	0	0	0	0
YBR184W	0	0	0	0	0	0
YBR184W	0	0	0	0	0	0
YBR184W	0	0	0	0	0	0
YBR184W	0	0	0	0	0	0
YBR184W	0	0	0	0	0	0
MAL32	0	0	0	0	0	0
YGR287C	0	0	0	0	0	0
MAL12	0	0	0	0	0	0
YIL172C	0	0	0	0	0	0
YJL216C	0	0	0	0	0	0
FSP2	0	0	0	0	0	0
FSP2	0	0	0	0	0	0
GAL7	1000	1000	1000	1000	1000	1000
TPS1	0	0	0	0	0	0
TSL1	0	0	0	0	0	0
TPS3	0.0023	0.0023	0.0023	0.0023	0.0023	0.0023
TPS2	0.0023	0.0023	0.0023	0.0023	0.0023	0.0023
ATH1	0	0	0	0	0	0
NTH2	0	0	0	0	0	0
NTH1	0	0	0	0	0	0
GLC3	0	0	0	0	0	0
GPH1	0	0	0	0	0	0
GSY1	0	0	0	0	0	0
GSY2	0.0518	0.0518	0.0518	0.0518	0.0518	0.0518
ACS1	0	0	0	0	0	0
ACS2	0.0551	0.0551	0.0551	0.0918	0.2153	0.0551
SFA1	0	0	0	0	0	0
YJL068C	0	0	0	0	0	0
PDC6	0.2154	0.1325	0.1264	9.7859	11.4542	6.1433
PDC5	0	0	0	0	0	0
PDC1	0	0	0	0	0	0
ACH1	0	0	0	0	0	0
LYS21	0	0	0	0	0	0
LYS20	0	0	0	0	0	0
LYS20	0.0286	0.0286	0.0286	0.0286	0.0286	0.0286
ADH4	-1000	-1000	-1000	-1000	-1000	-1000
ADH3	1.3077	0.1045	0.0968	0	0	0.0285
ADH2	-1.3077	-0.1045	-0.0968	-9.7612	-11.4383	-6.0384
ADH5	-1000	-1000	-1000	-1000	-1000	-1000
ADH1	1000	1000	1000	1000	1000	1000
SFA1	1000	1000	1000	1000	1000	1000
GLO1	0	0	0	0	0	0
GLO2	0	0	0	0	0	0
GLO4	0	0	0	0	0	0
IPP1	0.452	0.4336	0.4271	0.4563	0.6329	0.4134
PPA2	0	0	0	0	0	0
U2_	0	0	0	0	0	0
NDI1	0	0	0	0	0	0
NDH2	0	0	0	0	0	0
NDH1	5.5127	14.0214	12.2321	0	0	0
NCP1	0	0	0	0	0	0
SDH3	0.6853	0.6648	0.515	-0.0106	-0.0736	1.4788
RIP1	6.2088	12.4151	12.0216	0.0153	0.0055	1.4986
COX1	3.1044	6.2075	6.0108	0.0077	0.0027	0.7493
ATP1	6.5648	15.8582	15.2677	0.0161	0.0161	1.5633
CYB2	0	0	0	0	0	0
DLD1	0	0	0	0	0	0
YPL275W	0.0623	0	0	0	0	0
YPL276W	0	0	0	0	0	0
FDH1	0	0	0	0	0	0
DUR1	0	0	0	0	0	0
DUR1	0	0	0	0	0	0
NIT2	0	0	0	0	0	0
ECM17	-1000	-999.994	-999.994	-999.994	-999.994	-999.994
FAA2	-1000	-1000	-1000	-1000	-1000	-1000
FAA3	1000	1000	1000	1000	1000	1000
FAA1	-1000	-1000	-1000	-1000	-1000	-1000
FAA4	1000	1000	1000	1000	1000	1000
FOX2	0	0	0	0	0	0
POT1	0	0	0	0	0	0
ERG10	0.0013	0.0013	0.0013	0.0013	0.0013	0.0013
ERG10	0	0	0	0	0	0
ACP1	0	0	0	0	0	0
ACP1/CEM1/MCT1/OAR1	0	0	0	0	0	0
ACP1/CEM1/MCT1/OAR1	0	0	0	0	0	0
ACP1/CEM1/MCT1/OAR1	0	0	0	0	0	0
ACP1/CEM1/MCT1/OAR1	0	0	0	0	0	0
ACP1/CEM1/MCT1/OAR1	0	0	0	0	0	0
ACP1/CEM1/MCT1/OAR1	0	0	0	0	0	0
ACP1/CEM1/MCT1/OAR1	0	0	0	0	0	0
ACP1/CEM1/MCT1/OAR1	0	0	0	0	0	0
ACP1/CEM1/MCT1/OAR1	0	0	0	0	0	0
ACC1	0.0398	0.0398	0.0398	0.0398	0.0398	0.0398
FAS1	0.0398	0.0398	0.0398	0.0398	0.0398	0.0398
FAS1	0.0056	0.0056	0.0056	0.0056	0.0056	0.0056
CEM1	0	0	0	0	0	0
ACB1/ACC1/FAS1/FAS2/	0.0001	0.0001	0.0001	0.0001	0.0001	0.0001
ACB1/ACC1/FAS1/FAS2/	0.0003	0.0003	0.0003	0.0003	0.0003	0.0003
ACB1/ACC1/FAS1/FAS2/	0.0006	0.0006	0.0006	0.0006	0.0006	0.0006
ACB1/ACC1/FAS1/FAS2/	0	0	0	0	0	0
ACB1/ACC1/FAS1/FAS2/	0.0015	0.0015	0.0015	0.0015	0.0015	0.0015
ACB1/ACC1/FAS1/FAS2/	0.0009	0.0009	0.0009	0.0009	0.0009	0.0009
ACB1/ACC1/FAS1/FAS2/	0.0003	0.0003	0.0003	0.0003	0.0003	0.0003
ACB1/ACC1/FAS1/FAS2/	0.0013	0.0013	0.0013	0.0013	0.0013	0.0013
ACB1/ACC1/FAS1/FAS2/	0.0005	0.0005	0.0005	0.0005	0.0005	0.0005
FAS1	0	0	0	0	0	0
FAS1	0	0	0	0	0	0
POX1/FOX2/POT3	0	0	0	0	0	0
POX1/FOX2/POT3	0	0	0	0	0	0
POX1/FOX2/POT3	0	0	0	0	0	0
U3_	0.0025	0.0025	0.0025	0.0025	0.0025	0.0025
U4_	0	0	0	0	0	0
U5_	0	0	0	0	0	0
U6_	0	0	0	0	0	0
U7_	0	0	0	0	0	0
SLC1	0	0	0	0	0	0
U8_	0.0025	0.0025	0.0025	0.0025	0.0025	0.0025
CDS1	0	0	0	0	0	0
CDS1	0.0018	0.0018	0.0018	0.0018	0.0018	0.0018
CHO1	0.0012	0.0012	0.0012	0.0012	0.0012	0.0012
CHO1	0	0	0	0	0	0
PSD2	0.0011	0.0011	0.0011	0.0011	0.0011	0.0011
PSD1	0	0	0	0	0	0
CHO2	0.0006	0.0006	0.0006	0.0006	0.0006	0.0006
OPI3	0.0006	0.0006	0.0006	0.0006	0.0006	0.0006
OPI3	0.0006	0.0006	0.0006	0.0006	0.0006	0.0006
CKI1	0	0	0	0	0	0
PCT1	0	0	0	0	0	0
CPT1	0	0	0	0	0	0
EKI1	0	0	0	0	0	0
MUQ1	0	0	0	0	0	0
EPT1	0	0	0	0	0	0
INO1	0.0005	0.0005	0.0005	0.0005	0.0005	0.0005
INM1	0.0005	0.0005	0.0005	0.0005	0.0005	0.0005
PIS1	0.0005	0.0005	0.0005	0.0005	0.0005	0.0005
TOR1	0	0	0	0	0	0
TOR2	0	0	0	0	0	0
VPS34	0	0	0	0	0	0
PIK1	0	0	0	0	0	0
STT4	0	0	0	0	0	0
FAB1	0	0	0	0	0	0
MSS4	0	0	0	0	0	0
PLC1	0	0	0	0	0	0
PGS1	0	0	0	0	0	0
U9_	0	0	0	0	0	0
CRD1	0	0	0	0	0	0
DPP1	0.0007	0.0007	0.0007	0.0007	0.0007	0.0007
LPP1	0	0	0	0	0	0
LCB2	0	0	0	0	0	0
LCB1	0	0	0	0	0	0
TSC10	0	0	0	0	0	0
SUR2	0	0	0	0	0	0
U10_	0	0	0	0	0	0
U11_	0	0	0	0	0	0
SCS7	0	0	0	0	0	0
AUR1	0	0	0	0	0	0
CSG2	0	0	0	0	0	0
SUR1	0	0	0	0	0	0
IPT1	0	0	0	0	0	0
LCB4	0	0	0	0	0	0
LCB5	0	0	0	0	0	0
LCB4	0	0	0	0	0	0
LCB5	0	0	0	0	0	0
LCB3	0	0	0	0	0	0
YSR3	0	0	0	0	0	0
DPL1	0	0	0	0	0	0
HMGS	-0.0013	-0.0013	-0.0013	-0.0013	-0.0013	-0.0013
HMG2	-1000	-1000	-1000	-1000	-1000	-1000
HMG1	999.999	999.999	999.999	999.999	999.999	999.999
ERG12	0	0	0	0	0	0
ERG12	0	0	0	0	0	0
ERG12	0	0	0	0	0	0
ERG12	0.0013	0.0013	0.0013	0.0013	0.0013	0.0013
ERG8	0.0013	0.0013	0.0013	0.0013	0.0013	0.0013
MVD1	0.0013	0.0013	0.0013	0.0013	0.0013	0.0013
IDI1	0.0004	0.0004	0.0004	0.0004	0.0004	0.0004
ERG20	0.0004	0.0004	0.0004	0.0004	0.0004	0.0004
ERG20	0.0004	0.0004	0.0004	0.0004	0.0004	0.0004
ERG9	0.0002	0.0002	0.0002	0.0002	0.0002	0.0002
ERG1	0.0002	0.0002	0.0002	0.0002	0.0002	0.0002
ERG7	0.0002	0.0002	0.0002	0.0002	0.0002	0.0002
ERG11	0	0	0	0	0	0
ERG24	0	0	0	0	0	0
ERG25	0	0	0	0	0	0
ERG26	0	0	0	0	0	0
YLR100C	0	0	0	0	0	0
ERG25	0.0002	0.0002	0.0002	0.0002	0.0002	0.0002
ERG26	0.0002	0.0002	0.0002	0.0002	0.0002	0.0002
YLR100C	0.0002	0.0002	0.0002	0.0002	0.0002	0.0002
ERG6	-0.5533	0.0001	0.0001	0	0	0
ERG2	-0.5533	0.0001	0.0001	0	0	0
ERG3	-0.5533	0.0001	0.0001	0	0	0
ERG5	-0.5533	0.0001	0.0001	0	0	0
ERG4	-0.5533	0.0001	0.0001	0	0	0
U12_	0.0002	0.0002	0.0002	0.0002	0.0002	0.0002
U13_	0	0	0	0	0	0
U14_	0.5533	0	0	0.0001	0.0001	0.0001
PRS5	-1000	-1000	-1000	-1000	-1000	-1000
PRS4	0.0202	0.0591	0.0526	0.0452	0.0983	0.039
PRS2	1000	1000	1000	1000	1000	1000
PRS3	1000	1000	1000	1000	1000	1000
PRS1	-1000	-1000	-1000	-1000	-1000	-1000
DAL1	0	0	0	0	0	0
DAL2	0	0	0	0	0	0
DAL3	0	0	0	0	0	0
CYR1	0	0	0	0	0	0
GUK1	-999.938	-1000	-1000	-1000	-1000	-1000
GUK1	-0.0002	-0.0002	-0.0002	-0.0002	-0.0002	-0.0002
GUK1	1000	1000	1000	1000	1000	1000
ADE4	0	0.0098	0.0098	0.0098	0.0098	0.0098
ADE5,7	0	0.0098	0.0098	0.0098	0.0098	0.0098
ADE8	0	0.0098	0.0098	0.0098	0.0098	0.0098
ADE6	0	0.0098	0.0098	0.0098	0.0098	0.0098
ADE5,7	0	0.0098	0.0098	0.0098	0.0098	0.0098
ADE2	0	-0.0098	-0.0098	-0.0098	-0.0098	-0.0098
ADE1	0	0.0098	0.0098	0.0098	0.0098	0.0098
ADE13	0	0.0098	0.0098	0.0098	0.0098	0.0098
ADE16	-999.993	-999.984	-999.984	-999.984	-999.984	-999.984
ADE17	1000	1000	1000	1000	1000	1000
ADE16	-999.993	-999.984	-999.984	-999.984	-999.984	-999.984
ADE17	1000	1000	1000	1000	1000	1000
ADE12	0.0066	0.0116	0.0116	0.0116	0.0116	0.0116
ADE13	0.0066	0.0116	0.0116	0.0116	0.0116	0.0116
FUN63	0	0	0	0	0	0
PUR5	0	0	0	0	0	0
IMD4	0	0	0	0	0	0
IMD3	0	0.0048	0.0048	0.0048	0.0048	0.0048
YAR075W	0	0	0	0	0	0
GUA1	0	0.0048	0.0048	0.0048	0.0048	0.0048
AMD1	0	0	0	0	0	0
PDE1	0	0	0	0	0	0
PDE2	0	0	0	0	0	0
PDE2	0	0	0	0	0	0
PDE2	0	0	0	0	0	0
PDE2	0	0	0	0	0	0
PDE2	0	0	0	0	0	0
APA2	0	0	0	0	0	0
APA1	0	0	0	0	0	0
APA1	0	0	0	0	0	0
URA2	0.0107	0.0398	0.0333	0.0259	0.0791	0.0197
URA4	0.0107	0.0398	0.0333	0.0259	0.0791	0.0197
URA1	0	2.3109	0.7588	0	0	0
PYRD	0.0107	-2.2711	-0.7255	0.0259	0.0791	0.0197
URA5	-1000	-999.96	-999.967	-999.974	-999.921	-999.98
URA10	1000.01	1000	1000	1000	1000	1000
URA3	0.0107	0.0398	0.0333	0.0259	0.0791	0.0197
URA6	1000	1000	1000	1000	1000	1000
FUR1	0	0	0	0	0	0
FCY1	0	0	0	0	0	0
U15_	0.0002	0	0	0	0	0
U16_	0	0	0	0	0	0
URK1	0	0	0	0	0	0
URK1	0	0	0	0	0.6807	0
URK1	0	0	0	0	0	0
PNP1	-0.0002	0	0	0	0	0
PNP1	0.0002	0	0	0	0	0
CDD1	0	0	0	0	0	0
CDD1	0	0	0	0	0	0
CDC8	-0.0006	0.0288	0.0223	0.0149	0.068	0.0086
TRR1	0.0013	0.0357	0.0292	0.0218	0.075	0.0156
TRR2	0	0	0	0	0	0
DUT1	0	0	0	0	0	0
CDC21	0	0.0291	0.0226	0.0152	0.0684	0.009
U17_	0	0	0	0	0	0
U18_	-0.0027	-0.0027	-0.0027	-0.0027	-0.0027	-0.0027
DCD1	-0.0002	-0.0002	-0.0002	-0.0002	-0.0002	-0.0002
URA7	0	0	0	0	0	0
URA8	0	0	0	0	0	0
URA7	0.0045	0.0045	0.0045	0.0045	0.0045	0.0045
URA8	0	0	0	0	0	0
PUS4	-1000	-1000	-1000	-1000	-1000	-1000
PUS1	1000	1000	1000	1000	1000	1000
PUS2	-1000	-1000	-1000	-1000	-1000	-1000
DEG1	1000	1000	1000	1000	1000	1000
APT1	0	0	0	0	0	0
APT2	0	0	0	0	0	0
AAH1	0	0	0	0	0	0
AAH1	0	0	0	0	0	0
PNP1	0	0	0	0	0	0
PNP1	0	0	0	0	0	0
PNP1	0	0	0	0	0	0
PNP1	0	0	0	0	0	0
PNP1	1000	1000	1000	1000	1000	1000
PNP1	-999.933	-1000	-1000	-1000	-1000	-1000
PNP1	0	0	0	0	0	0
XPT1	0	0	0	0	0	0
URH1	0	0	0	0	0	0
URH1	0	0	0	0	0	0
YJR105W	0.0019	0.0019	0.0019	0.0019	0.0019	0.0019
ADK1	-999.715	-999.719	-999.725	-999.696	-998.839	-999.739
ADK1	999.85	999.907	999.907	999.908	999.227	999.908
ADK1	0	0	0	0	0	0
ADK2	0	0	0	0	0	0
ADK2	0	0	0	0	0	0
ADK2	0	0	0	0	0	0
RNR3	0	0	0	0	0	0
YNK1	0.1735	0.1735	0.1735	0.1889	0.2421	0.1827
YNK1	-0.0027	-0.0027	-0.0027	-0.0027	-0.0027	-0.0027
YNK1	-0.0002	-0.0002	-0.0002	0	0	0
YNK1	0	0	0	-0.0155	-0.0686	-0.0092
YNK1	0	0	0	0	0	0
YNK1	-0.0006	0.0288	0.0223	0.0149	0.068	0.0086
YNK1	1000	1000	1000	1000	1000	1000
YNK1	1000	1000	1000	1000	1000	1000
YNK1	0	0	0	0	0	0
U19_	-0.0004	-0.0004	-0.0004	-0.0004	-0.0004	-0.0004
AAH1	0	0	0	0	0	0
U20_	0	0	0	0	0	0
U21_	0.0671	0	0	0	0	0
HPT1	0	0	0	0	0	0
HPT1	0	0	0	0	0	0
U22_	0.0002	0	0	0	0	0
URA6	-1000	-999.966	-999.973	-999.98	-999.927	-999.986
URA6	0	-0.0294	-0.0229	-0.0155	-0.0686	-0.0092
U23_	0	0	0	0	0	0
DCD1	0	0	0	0	0	0
U24_	0	0	0	0	0	0
U25_	0.0002	0	0	0	0	0
U26_	0	0	0	0	0	0
U27_	0	0	0	0	0	0
U28_	0	0	0	0	0	0
U29_	0	0	0	0	0.6807	0
U30_	0	0	0	0	0	0
U31_	0	0	0	0	0	0
U32_	0	0	0	0	0	0
U33_	0	0	0	0	0	0
U34_	0.0002	0	0	0	0	0
RNR1	0.0004	0.0004	0.0004	0.0004	0.0004	0.0004
RNR1	0	0	0	0.0002	0.0002	0.0002
RNR1	0	0	0	0	0	0
RNR1	0	0.0294	0.0229	0	0	0
U35_	0	0	0	0	0	0
U36_	0.0002	0.0002	0.0002	0	0	0
U37_	0	0	0	0	0	0
U38_	0	0	0	0.0155	0.0686	0.0092
U39_	0	0	0	0	0	0
U40_	0	0	0	0	0	0
AMD1	0	0	0	0	0	0
YBR284W	0	0	0	0	0	0
YJL070C	0	0	0	0	0	0
GAD1	0	0	0	0	0	0
UGA1	0	0	0	0	0	0
YBR006W	0	0	0	0	0	0
GFA1	0	0	0	0	0	0
GNA1	0	0	0	0	0	0
PCM1	0	0	0	0	0	0
QRI1	0	0	0	0	0	0
CHS3	0	0	0	0	0	0
CHS2	0	0	0	0	0	0
CHS1	0	0	0	0	0	0
PUT2	0	0	0	0.1067	0	0
U41_	0	9.3344	8.42	0.1882	0.2159	0
GLT1	0	0	0	0.5759	0.7723	0
GDH2	0	0	0	0	0	0
GDH3	0	0	0	0	0	0
GDH1	0.4671	0.5209	0.5144	0	0	0.5007
GLN1	0.057	0.1105	0.104	0.6725	0.9221	0.0904
PCM1	0	0	0	0	0	0
U42_	0	0	0	0	0	0
U43_	0	0	0	0	0	0
U44_	0	0	0	0	0	0
ARA1	0	0	0	0	0	0
ARA1	0	0	0	0	0	0
XKS1	0	0	0	0	0	0
U45_	0	0	0	0	0	0
AAT1	0	0	0	0	0	0
AAT2	0.0784	0.1372	0.1372	0.2751	0.4743	0.1022
YAT1	0	0	0	0.0367	0.1601	0
CAT2	0	0	0	0.0367	0.1601	0
YDR111C	0.1048	0.0459	0.0459	0.0459	0.0459	0.0809
YLR089C	0	0	0	0	0	0
ASN1	0.0102	0	0	0	0	0
ASN2	0	0.0102	0.0102	0.0102	0.0102	0.0102
MHT1	0	0	0	0	0	0
SAM4	0	0	0	0	0	0
YCR024C	0	0	0	0	0	0
DED81	0	0	0	0	0	0
ASP3-1	0	0	0	0	0	0
ASP3-2	0	0	0	0	0	0
ASP3-3	0	0	0	0	0	0
ASP3-4	0	0	0	0	0	0
ASP1	0	0	0	0	0	0
SER3	0	0	0	0	0	0
SER33	0.0318	0.0856	0.0791	0.0028	0	0.0654
SER1	0.0318	0.0856	0.0791	0.0028	0	0.0654
SER2	0.0318	0.0856	0.0791	0.0028	0	0.0654
SHM1	1000	1000	1000	999.98	999.832	1000
SHM2	-999.991	-999.938	-999.944	-1000	-999.898	-999.958
YFL030W	0.059	0	0	0	0	0.0351
GCV1	0	0	0	0.0205	0.1685	0
GCV1	0	0	0	0.0484	0	0
HOM3	0.0051	0.02	0.0265	0.1717	0.3178	0.0051
HOM2	0.0051	0.02	0.0265	0.1717	0.3178	0.0051
HOM6	0.0051	0.02	0.0265	0.1717	0.3178	0.0051
HOM6	0	0	0	0	0	0
THR1	0	0.0149	0.0214	0.1667	0.3128	0
THR4	0	0.0149	0.0214	0.1667	0.3128	0
CYS4	0	0	0	0	0.0437	0
GLY1	0.0384	0.0235	0.017	0	0	0.0384
GCV2	0	0	0	0	0	0
CHA1	0	0	0	0	0	0
ILV1	0.0193	0.0193	0.0193	0.0193	0.0193	0.0193
CHA1	0	0	0	0	0	0
YIL167W	0	0	0	0	0	0
U46_	0	0	0	0.1283	0.2743	0
YFR055W	0	0	0	0	0.0437	0
SAH1	0.0019	0.0019	0.0019	0.0019	0.0019	0.0019
MET6	0	0	0	0	0	0
U47_	0.0019	0.0069	0.0069	0.0069	0.0069	0.0069
CYS3	0	0	0	0	0	0
MET2	0.0051	0.0051	0.0051	0.0051	0.0051	0.0051
MET17	0.0051	0	0	0	0	0
MET17	0	0.0051	0.0051	0.0051	0.0051	0.0051
MET17	0	0	0	0	0	0
YML082W	0	0	0	0	0	0
SAM2	0.0019	0.0019	0.0019	0.0019	0.0019	0.0019
SAM1	0	0	0	0	0	0
DPH5	0	0	0	0	0	0
MET3	0	0	0	0	0	0
MET14	0.0007	0.0057	0.0057	0.0057	0.0057	0.0057
MET10	1000	1000	1000	1000	1000	1000
U48_	0.0007	0.0007	0.0007	0.0007	0.0007	0.0007
YGR012W	0.0007	0.0007	0.0007	0.0007	0.0007	0.0007
MET22	0.0007	0.0057	0.0057	0.0057	0.0057	0.0057
MET16	0.0007	0.0057	0.0057	0.0057	0.0057	0.0057
APA1	0.0007	0.0057	0.0057	0.0057	0.0057	0.0057
BAT1	0	0	0	0	0	0
BAT1	0	0	0	0	0	0
BAT2	0.0193	0.0193	0.0193	0.0193	0.0193	0.0193
BAT2	0.0265	0.0265	0.0265	0.0265	0.0265	0.0265
BAT2	0.0296	0.0296	0.0296	0.0296	0.0296	0.0296
ILV2	0.0193	0.0193	0.0193	0.0193	0.0193	0.0193
ILV2	0.0561	0.0561	0.0561	0.0561	0.0561	0.0561
ILV5	0.0561	0.0561	0.0561	0.0561	0.0561	0.0561
ILV5	0.0193	0.0193	0.0193	0.0193	0.0193	0.0193
ILV3	0.0561	0.0561	0.0561	0.0561	0.0561	0.0561
ILV3	0.0193	0.0193	0.0193	0.0193	0.0193	0.0193
LEU4	0.0296	0.0296	0.0296	0.0296	0.0296	0.0296
LEU1	0	0	0	0	0	0
LEU1	0	0	0	0	0	0
LEU2	0.0296	0.0296	0.0296	0.0296	0.0296	0.0296
U49_	0.0286	0.0286	0.0286	0.0286	0.0286	0.0286
LYS4	-0.0286	-0.0286	-0.0286	-0.0286	-0.0286	-0.0286
LYS12	0.0286	0.0286	0.0286	0.0286	0.0286	0.0286
U50_	0.0286	0.0286	0.0286	0.0286	0.0286	0.0286
U51_	0.0286	0.0286	0.0286	0.0286	0.0286	0.0286
LYS2	0	0	0	0	0	0
LYS2	0.0286	0.0286	0.0286	0.0286	0.0286	0.0286
LYS9	0.0286	0.0286	0.0286	0.0286	0.0286	0.0286
LYS1	0.0286	0.0286	0.0286	0.0286	0.0286	0.0286
KRS1	0	0	0	0	0	0
MSK1	0	0	0	0	0	0
ECM40	0	0	0	0	0	0
ARG5	0.0161	0.0161	0.0161	0.0161	0.0161	0.0161
ARG5	0.0161	0.0161	0.0161	0.0161	0.0161	0.0161
ARG8	0.0161	0.0161	0.0161	0.0161	0.0161	0.0161
ECM40	0.0161	0.0161	0.0161	0.0161	0.0161	0.0161
URA2	0	0	0	0	0	0
CPA2	0.0268	0.0559	0.0494	0.042	0.0951	0.0358
ARG3	0.0161	0.0161	0.0161	0.0161	0.0161	0.0161
CAR2	0	0	0	0	0	0
ARG1	0.0161	0.0161	0.0161	0.0161	0.0161	0.0161
ARG4	0.0161	0.0161	0.0161	0.0161	0.0161	0.0161
SPE1	0	0	0	0	0	0
SPE2	0	0	0	0	0	0
SPE3	0	0	0	0	0	0
SPE4	0	0	0	0	0	0
AMD2	0	0	0	0	0	0
YMR293C	0	0	0	0	0	0
CAR1	0	0	0	0	0	0
YDR341C	0	0	0	0	0	0
MSR1	0	0	0	0	0	0
DYS1	0	0	0	0	0	0
HIS1	0.0066	0.0066	0.0066	0.0066	0.0066	0.0066
HIS4	0.0066	0.0066	0.0066	0.0066	0.0066	0.0066
HIS4	0.0066	0.0066	0.0066	0.0066	0.0066	0.0066
HIS6	0.0066	0.0066	0.0066	0.0066	0.0066	0.0066
HIS3	0.0066	0.0066	0.0066	0.0066	0.0066	0.0066
HIS5	0.0066	0.0066	0.0066	0.0066	0.0066	0.0066
HIS2	0.0066	0.0066	0.0066	0.0066	0.0066	0.0066
HIS4	0.0066	0.0066	0.0066	0.0066	0.0066	0.0066
HIS7	0.0066	0.0066	0.0066	0.0066	0.0066	0.0066
HTS1	0	0	0	0	0	0
HMT1	0	0	0	0	0	0
ARO4	0.0264	0.0264	0.0264	0.0264	0.0264	0.0264
ARO3	0	0	0	0	0	0
ARO1	0.0264	0.0264	0.0264	0.0264	0.0264	0.0264
ARO1	0.0264	0.0264	0.0264	0.0264	0.0264	0.0264
ARO1	0.0264	0.0264	0.0264	0.0264	0.0264	0.0264
ARO1	0.0264	0.0264	0.0264	0.0264	0.0264	0.0264
ARO1	0.0264	0.0264	0.0264	0.0264	0.0264	0.0264
ARO2	0.0264	0.0264	0.0264	0.0264	0.0264	0.0264
ARO7	0.0236	0.0236	0.0236	0.0236	0.0236	0.0236
PHA2	0.0134	0.0134	0.0134	0.0134	0.0134	0.0134
ARO9	0.0134	0.0134	0.0134	0.0134	0.0134	0.0134
TYR1	0.0102	0.0102	0.0102	0.0102	0.0102	0.0102
ARO8	0.0102	0.0102	0.0102	0.0102	0.0102	0.0102
ARO9	0	0	0	0	0	0
U52_	0	0	0	0	0	0
TRP2	0.0028	0.0028	0.0028	0.0028	0.0028	0.0028
TRP3	0	0	0	0	0	0
TRP4	0.0028	0.0028	0.0028	0.0028	0.0028	0.0028
TRP1	0.0028	0.0028	0.0028	0.0028	0.0028	0.0028
TRP3	0.0028	0.0028	0.0028	0.0028	0.0028	0.0028
TRP5	0.0028	0.0028	0.0028	0.0028	0.0028	0.0028
CTA1	0	1.1555	0.3794	0	0	0
CTT1	0	0	0	0	0	0
AAT1	-1000	-1000	-1000	-1000	-1000	-1000
AAT2	1000	1000	1000	1000	1000	1000
ALD2	0	0	0	0	0	0
ALD3	0	0	0	0	0	0
ALD4	0	0.1045	0.0968	0	0	0
ALD4	1.3077	0	0	0	0	0
ALD5	0	0	0	0	0	0.0285
ALD6	-1.1408	0	0	0.0125	0	0.0524
YJR078W	0	0	0	0	0	0
U53_	0	0	0	0	0	0
YLR231C	0	0	0	0	0	0
YBL098W	0	0	0	0	0	0
YLR231C	0	0	0	0	0	0
BNA1	0	0	0	0	0	0
U54_	0	0	0	0	0	0
U55_	0	0	0	0	0	0
U56_	0	0	0	0	0	0
U57_	0	0	0	0	0	0
U58_	0	0	0	0	0	0
U59_	0	0	0	0	0	0
U60_	0	0	0	0	0	0
MSW1	0	0	0	0	0	0
AMD2	0	0	0	0	0	0
AMD2	0	0	0	0	0	0
U61_	0	0	0	0	0	0
U62_	0	0	0	0	0	0
U63_	0	0	0	0	0	0
U64_	0	0	0	0	0	0
U65_	0	0	0	0	0	0
PRO1	0.0165	9.3509	8.4365	0.3114	0.2323	0.0165
PRO2	0.0165	9.3509	8.4365	0.3114	0.2323	0.0165
PRO2	0	0	0	0	0	0
U66_	0.0165	9.3509	8.4365	0.3114	0.2323	0.0165
U67_	0	0	0	-0.1067	0	0
PRO3	0.0165	9.3509	8.4365	0.3114	0.2323	0.0165
PRO3	0	0	0	0	0	0
PRO3	0	0	0	0	0	0
PUT1	0	9.3344	8.42	0.2949	0.2159	0
U68_	0	0	0	0	0	0
ALD5	0	0	0	0	0	0
NIT2	0	0	0	0	0	0
NIT2	0	0	0	0	0	0
NMT1	0	0	0	0	0	0
NAT1	0	0	0	0	0	0
NAT2	0	0	0	0	0	0
GSH1	0	0	0	0	0	0
GSH2	0	0	0	0	0	0
GPX2	1000	1000	1000	1000	1000	1000
HYR1	-1000	-1000	-1000	-1000	-1000	-1000
GPX1	0	0	0	0	0	0
GLR1	0	0	0	0	0	0
ECM38	0	0	0	0	0	0
GSC2	0	0	0	0	0	0
FKS1	0	0	0	0	0	0
FKS3	0.1135	0.1135	0.1135	0.1135	0.1135	0.1135
EXG2	0	0	0	0	0	0
BGL2	0	0	0	0	0	0
EXG1	0	0	0	0	0	0
SPR1	0	0	0	0	0	0
SEC59	0	0	0	0	0	0
DPM1	0.0808	0.0808	0.0808	0.0808	0.0808	0.0808
PMT2	0	0	0	0	0	0
PMT5	0.0808	0.0808	0.0808	0.0808	0.0808	0.0808
PMT1	0	0	0	0	0	0
PMT6	0	0	0	0	0	0
PMT4	0	0	0	0	0	0
PMT3	0	0	0	0	0	0
KTR4	0	0	0	0	0	0
KTR3	0	0	0	0	0	0
KRE2	0	0	0	0	0	0
YUR1	0	0	0	0	0	0
KTR2	0	0	0	0	0	0
KTR1	0	0	0	0	0	0
KTR6	0	0	0	0	0	0
HOR2	0.2222	0.05	0.0836	0.5894	0.1684	0.0119
RHR2	0	0	0	0	0	0
CDA1	0	0	0	0	0	0
CDA2	0	0	0	0	0	0
DAK2	0	0	0	0	0	0
DAK1	0	0	0	0	0	0
GPD1	0	0	0	0	0	0
GPD2	0.2247	0.0525	0.0861	0.5919	0.2572	1.4139
GUT1	0	0	0	0	0	0
GUT2	0	0	0	0	0.0863	1.3995
U69_	0.0007	0.0007	0.0007	0.0007	0.0007	0.0007
THI80	0	0	0	0	0	0
THI80	0	0	0	0	0	0
U70_	0	0	0	0	0	0
THI20	0	0	0	0	0	0
THI21	0	0	0	0	0	0
THI22	0	0	0	0	0	0
THI20	0	0	0	0	0	0
U71_	0	0	0	0	0	0
U72_	0	0	0	0	0	0
U73_	0	0	0	0	0	0
U74_	0	0	0	0	0	0
U75_	0	0	0	0	0	0
THI6	0	0	0	0	0	0
THI6	0	0	0	0	0	0
U76_	0	0	0	0	0	0
U77_	0	0	0	0	0	0
RIB1	0.0623	0	0	0	0	0
RIB7	0	0	0	0	0	0
RIB7	0	0	0	0	0	0
U78_	0	0	0	0	0	0
U79_	0	0	0	0	0	0
RIB5	0	0	0	0	0	0
PHO11	0	0	0	0	0	0
FMN1	0	0	0	0	0	0
FMN1	0	0	0	0	0	0
FAD1	0	0	0	0	0	0
U80_	0	0	0	0	0	0
U81_	0	0	0	0	0	0
U82_	0	0	0	0	0	0
U83_	0	0	0	0	0	0
PDX3	0	0	0	0	0	0
PDX3	0	0	0	0	0	0
PDX3	0	0	0	0	0	0
PDX3	0	0	0	0	0	0
PDX3	0	0	0	0	0	0
SER1	0	0	0	0	0	0
THR4	0	0	0	0	0	0
U84_	0	0	0	0	0	0
U85_	0	0	0	0	0	0
U86_	0	0	0	0	0	0
BIO3	0	0	0	0	0	0
BIO4	0	0	0	0	0	0
BIO2	0	0	0	0	0	0
FOL2	0	0	0	0	0	0
U87_	0	0	0	0	0	0
PHO8	0	0	0	0	0	0
YDL100C	0	0	0	0	0	0
FOL1	0	0	0	0	0	0
FOL1	0	0	0	0	0	0
ABZ1	0	0	0	0	0	0
U88_	0	0	0	0	0	0
FOL1	0	0	0	0	0	0
FOL1	0	0	0	0	0	0
U89_	0	0	0	0	0	0
DFR1	0	0	0	0.0152	0.0684	0.009
DFR1	0	0.0291	0.0226	0	0	0
U90_	0	0	0	0	0	0
U91_	0.0019	0.0069	0.0069	0.0069	0.0069	0.0069
RMA1	1000	1000	1000	1000	1000	1000
FOL3	-1000	-1000	-1000	-1000	-1000	-1000
MET7	0	0	0	0	0	0
MET12	0	0	0	0	0	0
MET13	0	0	0	0	0	0
MIS1	0	0	0	0	0	0
ADE3	0.0085	0.0332	0.0332	0.0332	0.0332	0.0332
MIS1	0	0	0	0	0	0
ADE3	0	0	0	0	0	0
MIS1	0	0	0	0	0	0
ADE3	0.0085	0.0332	0.0332	0.0332	0.0332	0.0332
MTD1	0	0	0	0	0	0
FMT1	0	0	0	0	0	0
ECM31	0	0	0	0	0	0
PAN5	0	0	0	0	0	0
ILV5	0	0	0	0	0	0
YIL145C	0	0	0	0	0	0
YDR531W	0	0	0	0	0	0
U92_	0	0	0	0	0	0
U93_	0	0	0	0	0	0
U94_	0	0	0	0	0	0
U95_	0	0	0	0	0	0
U96_	0	0	0	0	0	0
U97_	0	0	0	0	0	0
U98_	0	0	0	0	0	0
PPT2	0	0	0	0	0	0
PNC1	0	0	0	0	0	0
NPT1	0	0	0	0	0	0
U99_	0	0	0	0	0	0
U100_	0	0	0	0	0	0
QPT1	0	0	0	0	0	0
YLR328W	0	0	0	0	0	0
QNS1	0	0	0	0	0	0
UTR1	0	0	0	0	0	0
YEL041W	0	0	0	0	0	0
POS5	0	0	0	0	0	0
U101_	0	0	0	0	0	0
U102_	0	0	0	0	0	0
U103_	1000	1000	1000	1000	1000	1000
U104_	-1000	-1000	-1000	-1000	-1000	-1000
QPT1	0	0	0	0	0	0
YLR328W	0	0	0	0	0	0
YLR328W	0	0	0	0	0	0
QNS1	0	0	0	0	0	0
UTR1	0	0	0	0	0	0
POS5	0	0	0	0	0	0
YEL041W	0	0	0	0	0	0
U105_	0	0	0	0	0	0
PNP1	0	0	0	0	0	0
PNP1	0	0	0	0	0	0
PNC1	0	0	0	0	0	0
NPT1	0	0	0	0	0	0
U106_	0	0	0	0	0	0
HEM1	0	0	0	0	0	0
HEM2	0	0	0	0	0	0
HEM3	0	0	0	0	0	0
HEM4	0	0	0	0	0	0
HEM12	0	0	0	0	0	0
HEM13	0	0	0	0	0	0
HEM14	0	0	0	0	0	0
HEM15	0	0	0	0	0	0
YGL245W	0	0	0	0	0	0
MSE1	0	0	0	0	0	0
MET1	0	0	0	0	0	0
TRP3	0	0	0	0	0	0
TRP2	0	0	0	0	0	0
BET2	0	0	0	0	0	0
COQ1	0	0	0	0	0	0
COQ2	0	0	0	0	0	0
COX10	0	0	0	0	0	0
RAM1	0	0	0	0	0	0
RER2	0	0	0	0	0	0
SRT1	0	0	0	0	0	0
PAD1	0	0	0	0	0	0
U107_	0	0	0	0	0	0
DIM1	0	0	0	0	0	0
U108_	0	0	0	0	0	0
COQ5	0	0	0	0	0	0
COQ6	0	0	0	0	0	0
COQ3	0	0	0	0	0	0
U109_	3.1044	6.2075	6.0108	0.0077	0.0027	0.7493
U110_	-2.2917	-2.4553	-1.9705	-0.2686	-0.305	-0.5186
U111_	1.3077	0.1045	0.0968	0	0	0.0285
U112_	-0.0193	-0.0193	-0.0193	-0.0193	-0.0193	-0.0193
U113_	0	0	0	0	0	0
U114_	-1000	-1000	-1000	-999.985	-999.932	-999.991
U115_	1000	1000	1000	1000	1000	1000
U116_	-1000	-1000	-1000	-999.98	-999.832	-1000
U117_	1000	1000	1000	999.959	999.663	1000
U118_	0	0	0	0	0	0
U119_	0	0	0	0	0	0
U120_	0	-9.3344	-8.42	-0.2949	-0.2159	0
U121_	0	0	0	0	0	0
U122_	1.3077	0.1045	0.0968	0	0	0.0285
U123_	0	0	0	0.0367	0.1601	0
U124_	0	0	0	0.0367	0.1601	0
U125_	0	0	0	0	0	0
U126_	0	0	0	0	0	0
U127_	0	0	0	0	0	0
U128_	-0.0193	-0.0193	-0.0193	-0.0193	-0.0193	-0.0193
U129_	0.0286	0.0286	0.0286	0.0286	0.0286	0.0286
AAC1	7.1912	16.5587	15.8066	0	0	1.6067
PET9	0	0	0	0	0	0
AAC3	0	0	0	0	0	0
MIR1	-5.5024	-21.9437	-19.4531	998.98	999.245	999.445
YER053C	0	0	0	-999.737	-999.816	-1000
DIC1	-999.357	-999.283	-999.445	-999.989	-999.84	-999.941
DIC1	-5.5024	-21.9437	-19.4531	-0.7576	-0.5709	-0.5549
DIC1	0	0	0	0	0	0
U130_	0	0	0	0	0	0
OAC1	5.5149	21.9563	19.4657	0.7701	0.7433	0.5675
CTP1	-0.1483	-0.0893	-0.0893	-0.0893	-0.0893	-0.1244
CTP1	0	0	0	0	0	0
CTP1	0.1483	0.0893	0.0893	0.0893	0.0893	0.1244
U131_	-0.0296	-0.0296	-0.0296	-0.0296	-0.0296	-0.0296
U132_	0	0	0	0	0	0
U133_	0.9931	1.0083	0.8467	0.255	-0.0283	0.3861
U134_	0.0321	-9.3023	-8.3879	-1000	-1000	-999.968
U135_	0	0	0	999.737	999.816	1000
ORT1	-0.0161	-0.0161	-0.0161	-0.0161	-0.0161	-0.0161
CRC1	0	0	0	0	0	0
U136_	-0.0265	-0.0265	-0.0265	-0.0265	-0.0265	-0.0265
U137_	-0.0193	-0.0193	-0.0193	-0.0193	-0.0193	-0.0193
FLX1	0	0	0	0	0	0
U138_	0	0	0	0	0	0
U139_	0	0	0	0	0	0
U140_	0	0	0	0	0	0
U141_	0	0	0	0	0	0
U142_	0	0	0	0	0	0
U143_	0	0	0	0	0	0
U144_	0	0	0	0	0	0
U145_	0	0	0	0	0	0
U146_	0	0	0	0.0152	0.0684	0.009
U147_	0	0	0	0	0	0
U148_	0	0	0	0	0	0
U149_	0	0	0	0	0	0
U150_	0	0	0	0	0	0
SFC1	0	0	0	0	0	0
ODC1	1000	1000	1000	1000	1000	1000
ODC2	-1000	-1000	-1000	-1000	-1000	-1000
U151_	0	0	0	0	0	0
U152_	0	0	0	0	0	0
HXT4	0	0	0	0	0	0
GAL2	1.2073	1.9623	1.8034	5.8886	6.6569	3.7855
HXT11	0	0	0	0	0	0
STL1	0	0	0	0	0	0
HXT1	0	0	0	0	0	0
HXT11	0	0	0	0	0	0
HXT13	0	0	0	0	0	0
HXT15	0	0	0	0	0	0
HXT16	0	0	0	0	0	0
HXT10	0	0	0	0	0	0
HXT17	0	0	0	0	0	0
HXT2	0	0	0	0	0	0
HXT4	0	0	0	0	0	0
HXT3	0	0	0	0	0	0
HXT5	0	0	0	0	0	0
HXT6	0	0	0	0	0	0
HXT7	0	0	0	0	0	0
HXT8	0	0	0	0	0	0
HXT9	0	0	0	0	0	0
GAL2	0	0	0	0	0	0
HXT10	0	0	0	0	0	0
HXT11	0	0	0	0	0	0
HXT14	0	0	0	0	0	0
HXT9	0	0	0	0	0	0
STL1	0	0	0	0	0	0
AGP3	-1000	-1000	-1000	-1000	-1000	-1000
STL1	1000	1000	1000	1000	1000	1000
GAP1	1000	1000	1000	1000	1000	1000
AGP1	-1000	-1000	-1000	-1000	-1000	-1000
DIP5	1000	1000	1000	-1000	-1000	-1000
STL1	-1000	-1000	-1000	1000	1000	1000
HXT1	0	0	0	0	0	0
HXT10	0	0	0	0	0	0
HXT11	0	0	0	0	0	0
HXT13	0	0	0	0	0	0
HXT15	0	0	0	0	0	0
HXT16	0	0	0	0	0	0
HXT17	0	0	0	0	0	0
HXT2	0	0	0	0	0	0
HXT3	0	0	0	0	0	0
HXT4	0	0	0	0	0	0
HXT5	0	0	0	0	0	0
HXT6	0	0	0	0	0	0
HXT7	0	0	0	0	0	0
HXT8	0	0	0	0	0	0
HXT9	0	0	0	0	0	0
HXT1	0	0	0	0	0	0
HXT10	0	0	0	0	0	0
HXT11	0	0	0	0	0	0
HXT13	0	0	0	0	0	0
HXT15	0	0	0	0	0	0
HXT16	0	0	0	0	0	0
HXT17	0	0	0	0	0	0
HXT2	0	0	0	0	0	0
HXT3	0	0	0	0	0	0
HXT4	0	0	0	0	0	0
HXT5	0	0	0	0	0	0
HXT6	0	0	0	0	0	0
HXT7	0	0	0	0	0	0
HXT8	0	0	0	0	0	0
HXT9	0	0	0	0	0	0
ITR1	0	0	0	0	0	0
ITR2	0	0	0	0	0	0
U153_	0	0	0	0	0	0
SUC2	0	0	0	0	0	0
U154_	0	0	0	0	0	0
MAL31	1000	1000	1000	1000	1000	1000
U155_	-1000	-1000	-1000	-1000	-1000	-1000
U156_	0	0	0	0	0	0
U157_	0	0	0	0	0	0
U158_	0	0	0	0	0	0
U159_	0	0	0	0	0	0
U160_	0	0	0	0	0	0
U161_	0	0	0	0	0	0
U162_	0	0	0	0	0	0
FPS1	-0.2222	-0.05	-0.0836	-0.5894	-0.1684	-0.0119
JEN1	0	0	0	0	0	0
U163_	0	0	0	0	0	0
U164_	0	0	0	0	0	0
U165_	0	0	0	0	0	0
U166_	0	0	0	0	0	0
U167_	0	0	0	0	0	0
U168_	0	0	0	0	0	0
U170_	0	0	0	0	0	0
GAP1	1000	1000	1000	1000	1000	1000
DIP5	1000	1000	1000	1000	1000	1000
AGP1	0	0	0	0	0	0
TAT2	-1000	-1000	-1000	-1000	-1000	-1000
PUT4	-1000	-1000	-1000	-1000	-1000	-1000
GAP1	-1000	-1000	-1000	-1000	-1000	-1000
CAN1	0	0	0	0	0	0
ALP1	1000	1000	1000	1000	1000	1000
GAP1	1000	1000	1000	1000	1000	1000
AGP1	-1000	-1000	-1000	-1000	-1000	-1000
GNP1	-1000	-1000	-1000	-1000	-1000	-1000
DIP5	1000	1000	1000	1000	1000	1000
AGP3	-1000	-1000	-1000	-1000	-1000	-1000
GAP1	0	0	0	0	0	0
DIP5	1000	1000	1000	1000	1000	1000
GAP1	1000	1000	1000	1000	1000	1000
GNP1	-1000	-1000	-1000	-1000	-1000	-1000
BAP2	-1000	-1000	-1000	-1000	-1000	-1000
BAP3	1000	1000	1000	1000	1000	1000
VAP1	1000	1000	1000	1000	1000	1000
TAT2	-1000	-1000	-1000	-1000	-1000	-1000
GAP1	-1000	-1000	-1000	-1000	-1000	-1000
TAT2	1000	1000	1000	1000	1000	1000
DIP5	-1000	-1000	-1000	-1000	-1000	-1000
PUT4	1000	1000	1000	1000	1000	1000
GAP1	-1000	-1000	-1000	-1000	-1000	-1000
AGP1	1000	1000	1000	1000	1000	1000
GNP1	1000	1000	1000	1000	1000	1000
DIP5	-1000	-1000	-1000	-1000	-1000	-1000
HIP1	-1000	-1000	-1000	-1000	-1000	-1000
GAP1	1000	1000	1000	1000	1000	1000
AGP1	-1000	-1000	-1000	-1000	-1000	-1000
VAP1	1000	1000	1000	1000	1000	1000
TAT1	-1000	-1000	-1000	-1000	-1000	-1000
GAP1	1000	1000	1000	1000	1000	1000
AGP1	1000	1000	1000	1000	1000	1000
BAP2	1000	1000	1000	1000	1000	1000
BAP3	-1000	-1000	-1000	-1000	-1000	-1000
VAP1	-1000	-1000	-1000	-1000	-1000	-1000
TAT1	-1000	-1000	-1000	-1000	-1000	-1000
GAP1	-1000	-1000	-1000	-1000	-1000	-1000
AGP1	-1000	-1000	-1000	-1000	-1000	-1000
BAP2	0	0	0	0	0	0
BAP3	1000	1000	1000	1000	1000	1000
VAP1	1000	1000	1000	1000	1000	1000
GNP1	1000	1000	1000	1000	1000	1000
GAP1	-1000	-1000	-1000	-1000	-1000	-1000
AGP1	-1000	-1000	-1000	-1000	-1000	-1000
GNP1	0	0	0	0	0	0
BAP2	-1000	-1000	-1000	-1000	-1000	-1000
BAP3	1000	1000	1000	1000	1000	1000
MUP1	1000	1000	1000	1000	1000	1000
MUP3	1000	1000	1000	1000	1000	1000
GAP1	-1000	-1000	-1000	-1000	-1000	-1000
AGP1	1000	1000	1000	1000	1000	1000
TAT2	-1000	-1000	-1000	-1000	-1000	-1000
BAP2	0	0	0	0	0	0
BAP3	1000	1000	1000	1000	1000	1000
GAP1	1000	1000	1000	1000	1000	1000
PUT4	-1000	-1000	-1000	-1000	-1000	-1000
TAT1	-1000	-1000	-1000	-1000	-1000	-1000
GAP1	-1000	-1000	-1000	-1000	-1000	-1000
VAP1	1000	1000	1000	1000	1000	1000
TAT2	1000	1000	1000	1000	1000	1000
BAP2	-1000	-1000	-1000	-1000	-1000	-1000
BAP3	1000	1000	1000	1000	1000	1000
TAT1	-1000	-1000	-1000	-1000	-1000	-1000
GAP1	1000	1000	1000	1000	1000	1000
AGP1	0	0	0	0	0	0
BAP2	-1000	-1000	-1000	-1000	-1000	-1000
VAP1	-1000	-1000	-1000	-1000	-1000	-1000
TAT2	1000	1000	1000	1000	1000	1000
BAP3	1000	1000	1000	1000	1000	1000
GAP1	-1000	-1000	-1000	-1000	-1000	-1000
AGP1	1000	1000	1000	1000	1000	1000
BAP3	-1000	-1000	-1000	-1000	-1000	-1000
VAP1	1000	1000	1000	1000	1000	1000
BAP2	0	0	0	0	0	0
AGP3	-1000	-1000	-1000	-1000	-1000	-1000
AGP1	1000	1000	1000	1000	1000	1000
GNP1	1000	1000	1000	1000	1000	1000
GAP1	0	0	0	0	0	0
DIP5	-1000	-1000	-1000	-1000	-1000	-1000
TAT1	1000	1000	1000	1000	1000	1000
AGP1	1000	1000	1000	1000	1000	1000
GAP1	-1000	-1000	-1000	-1000	-1000	-1000
GNP1	-1000	-1000	-1000	-1000	-1000	-1000
LYP1	-1000	-1000	-1000	-1000	-1000	-1000
GAP1	1000	1000	1000	1000	1000	1000
MMP1	0	0	0	0	0	0
SAM3	0	0	0	0	0	0
PUT4	0	0	0	0	0	0
UGA4	0	0	0	0	0	0
AGP2	0	0	0	0	0	0
HNM1	0	0	0	0	0	0
BIO5	0	0	0	0	0	0
UGA4	0	0	0	0	0	0
GAP1	-1000	-1000	-1000	-1000	-1000	-1000
CAN1	1000	1000	1000	1000	1000	1000
U171_	0	0	0	0	0	0
U172_	0	0	0	0	0	0
PTR2	0	0	0	0	0	0
PTR2	0	0	0	0	0	0
PTR2	0	0	0	0	0	0
FUR4	0	0	0	0	0	0
U173_	0	0	0	0	0	0
FCY2	0	0	0	0	0	0
FCY2	0	0	0	0	0	0
FCY2	-999.933	-1000	-1000	-1000	-1000	-1000
FCY21	0	0	0	0	0	0
FCY21	0	0	0	0	0	0
FCY21	1000	1000	1000	1000	1000	1000
FCY22	0	0	0	0	0	0
FCY22	0	0	0	0	0	0
FCY22	1000	1000	1000	1000	1000	1000
YGL186C	0	0	0	0	0	0
YGL186C	0	0	0	0	0	0
YGL186C	-1000	-1000	-1000	-1000	-1000	-1000
U174_	0	0	0	0	0	0
U175_	0	0	0	0	0	0
FUI1	0	0	0	0	0	0
U176_	0	0	0	0	0	0
U177_	0	0	0	0	0	0
U178_	0	0	0	0	0	0
U179_	0	0	0	0	0	0
U180_	0	0	0	0	0	0
U181_	0	0	0	0	0	0
U182_	0	0	0	0	0	0
U183_	0	0	0	0	0	0
U184_	0	0	0	0	0	0
U185_	0	0	0	0	0	0
FUI1	0	0	0	0	0	0
U186_	0	0	0	0	0	0
U187_	0	0	0	0	0	0
U188_	0	0	0	0	0	0
U189_	0	0	0	0	0	0
U190_	0	0	0	0	0	0
U191_	0	0	0	0	0	0
U192_	0	0	0	0	0	0
FUI1	0	0	0	0	0	0
U193_	0	0	0	0	0	0
U194_	0	0	0	0	0	0
U195_	0	0	0	0	0	0
U196_	0	0	0	0	0	0
U197_	0	0	0	0	0	0
U198_	0	0	0	0	0	0
U199_	0	0	0	0	0	0
U200_	0	0	0	0	0	0
U201_	0	0	0	0	0	0
U202_	0	0	0	0	0	0
BPH1	-0.1175	-0.0551	-0.0474	-0.0547	-0.0648	-0.0315
U203_	0	0	0	0	0	0
U204_	0	0	0	-9.7612	-11.4383	-6.0099
U205_	-0.0161	-0.0519	-0.0401	-0.0106	-0.1599	-0.0151
JEN1	0	0	0	0	0	0
DUR3	0	0	0	0	0	0
MEP1	-1000	-1000	-1000	1000	1000	1000
MEP2	0.5095	0.6168	0.6038	-1000	-1000	-1000
MEP3	1000	1000	1000	0.589	0.6953	0.5766
TRK1	0	0	0	0	0	0
SUL1	0	0	0	0	0	0
SUL2	0	0	0	0.0077	0.0077	0.0077
YGR125W	0.0027	0.0077	0.0077	0	0	0
PHO84	0.0662	0.107	0.0875	0.0653	0.2247	0.0466
U206_	0	0	0	0	0	0
U207_	0	0	0	0	0	0
U208_	0	0	0	0	0	0
U209_	0	0	0	0	0	0
U210_	0	0	0	0	0	0
U211_	0	0	0	0	0	0
U212_	0	0	0	0	0	0
U213_	-1000	-1000	-1000	-1000	-1000	-1000
NHA1	0	0	0	0	0	0
FEN2	0	0	0	0	0	0
U214_	1	1	1	1	1	1
PMP1	0	0	0	0	0	0
PMP2	0	0	0	0	0	0
PMA1	0	0	0	0	0	0
PMA2	0	0	0	0	0	0
U215_	0	0	0	0	0	0
U216_	-0.0101	-0.0045	-0.0126	-0.0121	-0.0159	-0.0141
THI7	0	0	0	0	0	0
YOR071C	0	0	0	0	0	0
YOR192C	0	0	0	0	0	0
DAL4	0	0	0	0	0	0
DAL5	0	0	0	0	0	0
U217_	0	0	0	0	0	0
U218_	0	0	0	0	0	0
U219_	0.0006	-0.0288	-0.0223	-0.0149	-0.068	-0.0086
U220_	-0.0002	0	0	0	0	0
U221_	0	0	0	0	0	0
VHT1	0	0	0	0	0	0
U222_	0	0	0	0	0	0
U223_	0	0	0	0	0	0
U224_	0	0	0	0	0	0
U225_	0	0	0	0	0	0
U226_	0	0	0	0	0	0
U227_	1.9994	7.3647	6.3919	0.0092	0.0043	0.7508
U228_	-2.5279	-7.4448	-6.502	-10.1517	-11.5141	-6.8551
AUS1	0	0	0	0	0	0
AUS1	0	0	0	0	0	0
U229_	0	0	0	0	0	0
Growth	0.1	0.1	0.1	0.1	0.1	0.1
ACxt	0.1175	0.0551	0.0474	0.0547	0.0648	0.0315
ACALxt	0.0101	0.0045	0.0126	0.0121	0.0159	0.0141
ADxt	0	0	0	0	0	0
ADNxt	0	0	0	0	0	0
AKGxt	0	0	0	0	0	0
ALAxt	0	0	0	0	0	0
AONAxt	0	0	0	0	0	0
ARABxt	0	0	0	0	0	0
ARGxt	0	0	0	0	0	0
ASNxt	0	0	0	0	0	0
ASPxt	0	0	0	0	0	0
ATNxt	0	0	0	0	0	0
BTxt	0	0	0	0	0	0
C140xt	0	0	0	0	0	0
C160xt	0	0	0	0	0	0
C161xt	0	0	0	0	0	0
C180xt	0	0	0	0	0	0
C181xt	0	0	0	0	0	0
CHOxt	0	0	0	0	0	0
CITxt	0	0	0	0	0	0
CO2xt	2.5279	7.4448	6.502	10.1517	11.5141	6.8551
CYSxt	0	0	0	0	0	0
CYTDxt	0	0	0	0	0	0
CYTSxt	0	0	0	0	0	0
DAxt	0	0	0	0	0	0
DANNAxt	0	0	0	0	0	0
DCxt	0	0	0	0	0	0
DGxt	0	0	0	0	0	0
DINxt	0	0	0	0	0	0
DIPEPxt	0	0	0	0	0	0
DTxt	0	0	0	0	0	0
DTTPxt	-0.0006	0.0288	0.0223	0.0149	0.068	0.0086
DUxt	0	0	0	0	0	0
ETHxt	0	0	0	9.7612	11.4383	6.0099
FORxt	0	0	0	0	0	0
FRUxt	0	0	0	0	0	0
FUCxt	0	0	0	0	0	0
FUMxt	0	0	0	0	0	0
GA6Pxt	0	0	0	0	0	0
GABAxt	0	0	0	0	0	0
GLxt	0.2222	0.05	0.0836	0.5894	0.1684	0.0119
GL3Pxt	0	0	0	0	0	0
GLACxt	0	0	0	0	0	0
GLALxt	0	0	0	0	0	0
GLAMxt	0	0	0	0	0	0
GLCNxt	0	0	0	0	0	0
GLNxt	0	0	0	0	0	0
GLTxt	0	0	0	0	0	0
GLUxt	0	0	0	0	0	0
GLYxt	0	0	0	0	0	0
GNxt	-0.0671	0	0	0	0	0
GSNxt	0	0	0	0	0	0
HISxt	0	0	0	0	0	0
ILExt	0	0	0	0	0	0
INSxt	0	0	0	0	0	0
INSxt	0	0	0	0	0	0
LACxt	0	0	0	0	0	0
LEUxt	0	0	0	0	0	0
LYSxt	0	0	0	0	0	0
MALxt	0	0	0	0	0	0
MANxt	0	0	0	0	0	0
MANxt	0	0	0	0	0	0
MDAPxt	0	0	0	0	0	0
MELIxt	0	0	0	0	0	0
METxt	0	0	0	0	0	0
MIxt	0	0	0	0	0	0
MKxt	0	0	0	0	0	0
MMETxt	0	0	0	0	0	0
MNTxt	0	0	0	0	0	0
MTHNxt	0	0	0	0	0	0
MVLxt	0	0	0	0	0	0
NAxt	0	0	0	0	0	0
OGTxt	0	0	0	0	0	0
OPEPxt	0	0	0	0	0	0
ORNxt	0	0	0	0	0	0
PAPxt	0	0	0	0	0	0
PEPTxt	0	0	0	0	0	0
PHExt	0	0	0	0	0	0
PIMExt	0	0	0	0	0	0
PNTOxt	0	0	0	0	0	0
PROxt	0	0	0	0	0	0
PTRCxt	0	0	0	0	0	0
PYRxt	0	0	0	0	0	0
PYRDXxt	0	0	0	0	0	0
RIBxt	0	0	0	0	0	0
RMNxt	0	0	0	0	0	0
SAMxt	0	0	0	0	0	0
SERxt	0	0	0	0	0	0
SORxt	0	0	0	0	0	0
SPMDxt	0	0	0	0	0	0
SPRMxt	0	0	0	0	0	0
SUCxt	0	0	0	0	0	0
SUCCxt	0.0161	0.0519	0.0401	0.0106	0.1599	0.0151
THRxt	0	0	0	0	0	0
THYxt	0.0002	0	0	0	0	0
TRExt	0	0	0	0	0	0
TRPxt	0	0	0	0	0	0
TYRxt	0	0	0	0	0	0
URAxt	0	0	0	0	0	0
UREAxt	0	0	0	0	0	0
URIxt	0	0	0	0	0	0
VALxt	0	0	0	0	0	0
XANxt	0	0	0	0	0	0
XTSNxt	0	0	0	0	0	0
SLFxt	-0.0027	-0.0077	-0.0077	-0.0077	-0.0077	-0.0077
ZYMSTxt	0	0	0	0	0	0
ERGOSTxt	0	0	0	0	0	0
O2xt	-1.9994	-7.3647	-6.3919	-0.0092	-0.0043	-0.7508
NH3xt	-0.5095	-0.6168	-0.6038	-0.589	-0.6953	-0.5766
PIxt	-0.0662	-0.107	-0.0875	-0.0653	-0.2247	-0.0466
GLCxt	-1.2073	-1.9623	-1.8034	-5.8886	-6.6569	-3.7855
