# Supplementary material for: Yeast cells with impaired drug resistance accumulate glycerol and glucose
Source: Royal Society of Chemistry journal article supplement (doi:10.1039/c2mb25512j), 2013-10-22
Supplement: c2mb25512j_5.xlsx [file c2mb25512j_5.xlsx]

## Sheet: phenotype screening tests
OD600 after 48 hours following inoculation
Deletant	delHO/delHO			delPDR3/delPDR3				delQDR3/delQDR3
	R1	R2	avg	R1	R2	avg	p-value	R1	R2	avg	p-value
control	1.866	1.926	1.896	1.868	1.869	1.8685	0.456138	1.897	1.865	1.881	0.702196
YPD + hydrochloric acid	1.529	1.547	1.538	1.614	1.65	1.632	0.0429068	1.692	1.728	1.71	0.013415
YPD + acetic acid	1.495	1.49	1.4925	1.764	1.636	1.7	0.0835144	1.532	1.493	1.5125	0.416043
YPD + sodium hydroxide	0.028	0.025	0.0265	0.084	0.054	0.069	0.106154	0.028	0.019	0.0235	0.591752
YPD + potassium hydroxide	0.028	0.025	0.0265	0.041	0.026	0.0335	0.456695	0.058	0.092	0.075	0.104726
YPD + sodium chloride	1.575	1.604	1.5895	1.635	1.67	1.6525	0.109224	1.579	1.604	1.5915	0.926329
YPD + potassium chloride	1.681	1.665	1.673	1.637	1.681	1.659	0.61051	1.588	1.831	1.7095	0.792643
YPD + potassium acetate	1.8	1.759	1.7795	1.757	1.788	1.7725	0.81088	1.921	1.882	1.9015	0.0497993
YPD + sodium acetate	1.834	1.825	1.8295	1.845	1.808	1.8265	0.889268	1.852	1.874	1.863	0.10619
YPD + glycerol	0.142	0.118	0.13	0.421	0.413	0.417	0.00193684	0.403	0.405	0.404	0.0019258
YPD + sorbitol	1.369	1.333	1.351	1.39	1.394	1.392	0.151885	1.301	1.631	1.466	0.560039
YPD in vented flask	1.779	1.765	1.772	1.66	1.682	1.671	0.0162597	1.73	1.651	1.6905	0.179266
YPD in non-vented flask	1.5	1.544	1.522	1.508	1.482	1.495	0.401476	1.338	1.519	1.4285	0.421147
YPG in vented flask	1.215	1.299	1.257	0.202	0.237	0.2195	0.00191777	0.602	0.336	0.469	0.0299288
YPG in non-vented flask	1.163	1.162	1.1625	0.29	0.321	0.3055	0.000327296	0.407	0.412	0.4095	1.14635e-05
YPD + 2M glycerol in vented flask	0.165	0.154	0.1595	0.006	0.004	0.005	0.0013066	0.004	0.006	0.005	0.0013066
YPD + 2M glycerol in non-vented flask	0.947	0.966	0.9565	0.201	0.335	0.268	0.00952244	0.654	0.703	0.6785	0.00881659
F1 w/ dextrose	0.55	0.6	0.575	0.588	0.571	0.5795	0.880361	0.564	0.581	0.5725	0.933203
F1 w/ dextrose + Co++	0.474	0.516	0.495	0.588	0.515	0.5515	0.31173	0.601	0.523	0.562	0.269535
F1 w/ dextrose + Se++	0.588	0.62	0.604	0.572	0.642	0.607	0.944961	0.572	0.519	0.5455	0.199362
F1 w/ dextrose + Fe++	0.573		0.573	0.615	0.645	0.63	#DIV/0!	0.492	0.572	0.532	#DIV/0!
F1 w/ dextrose - Fe--	0.552	0.563	0.5575	0.6	0.571	0.5855	0.21275	0.587	0.558	0.5725	0.435468
F1 w/ dextrose + Cu++	0.493	0.543	0.518	0.564	0.596	0.58	0.171934		0.554	0.554	#DIV/0!
F1 w/ dextrose - Cu--	0.598	0.615	0.6065	0.598	0.613	0.6055	0.937743	0.546	0.608	0.577	0.455637
F1 w/ dextrose + Zn++	0.509	0.581	0.545	0.468	0.475	0.4715	0.179206	0.572	0.53	0.551	0.898726
F1 w/ dextrose - Zn--	0.616	0.657	0.6365	0.572	0.6	0.586	0.178916	0.615	0.623	0.619	0.490285
F1 w/ dextrose + Mg++	0.55	0.589	0.5695	0.597	0.764	0.6805	0.324801	0.597	0.557	0.577	0.813474
F1 w/ dextrose - Mg--	0.568	0.618	0.593	0.561	0.527	0.544	0.24651	0.51	0.547	0.5285	0.173807
F1 w/ glycerol	0.077	0.167	0.122	0.033	0.042	0.0375	0.202644	0.049	0.036	0.0425	0.222482
F1 w/ glycerol + Co++	0.114	0.043	0.0785	0.038	0.029	0.0335	0.335499	0.036	0.031	0.0335	0.333461
F1 w/ glycerol + Se++	0.014	0.016	0.015	0.027	0.006	0.0165	0.899944	0.008	0.007	0.0075	0.0215079
F1 w/ glycerol + Fe++	0.107	0.139	0.123	0.047	0.048	0.0475	0.0421334	0.035	0.034	0.0345	0.0311945
F1 w/ glycerol - Fe--	0.023	0.154	0.0885	0.04	0.042	0.041	0.543749	0.023	0.04	0.0315	0.479099
F1 w/ glycerol + Cu++	0.046	0.047	0.0465	0.03	0.04	0.035	0.149314	0	0.038	0.019	0.284869
F1 w/ glycerol - Cu--	0.04	0.084	0.062	0.032	0.078	0.055	0.84633	0.046	0.03	0.038	0.413061
F1 w/ glycerol + Zn++	0.068	0.056	0.062	0.034	0.028	0.031	0.0437745	0.035	0.028	0.0315	0.0481523
F1 w/ glycerol - Zn--	0.025	0.155	0.09	0.04	0.048	0.044	0.553166	0.034	0.032	0.033	0.473057
F1 w/ glycerol + Mg++	0.059	0.18	0.1195	0.048	0.025	0.0365	0.310104	0.052	0.054	0.053	0.38638
F1 w/ glycerol - Mg--	0.057	0.194	0.1255	0.06	0.065	0.0625	0.455071	0.068	0.069	0.0685	0.492887
